# Supplementary material for: PPP1R35 is a novel centrosomal protein that regulates centriole length in concert with the microcephaly protein RTTN
Source: eLife journal article supplement (doi:10.7554/elife.37846), 2018-08-31
Supplement: supp [file elife-37846-supp-v1.zip]

Archive with 31 entries (31 files):
- elife_poa_e37846_Figure_6_source_data_1.xlsx
- elife_poa_e37846_Figure_3_source_data_1.xlsx
- elife_poa_e37846_Figure_3_figure_supplement_1.pdf
- elife_poa_e37846_Supplementary_file_4.xlsx
- elife_poa_e37846_Video_1.mov
- elife_poa_e37846_Figure_3_figure_supplement_2_source_data_1.xlsx
- elife_poa_e37846_Supplementary_file_2.docx
- elife_poa_e37846_Figure_4_source_data_1.xlsx
- elife_poa_e37846_Supplementary_file_1.xlsx
- elife_poa_e37846_Figure_3_figure_supplement_2.pdf
- elife_poa_e37846_Figure_4_figure_supplement_1.pdf
- elife_poa_e37846_Figure_1_source_data_1.xlsx
- elife_poa_e37846_Figure_3_figure_supplement_5.pdf
- elife_poa_e37846_Figure_5_figure_supplement_1.pdf
- elife_poa_e37846_Figure_3_figure_supplement_3_source_data_1.xlsx
- elife_poa_e37846_Figure_3_figure_supplement_5_source_data_1.xlsx
- elife_poa_e37846_Figure_5_source_data_1.xlsx
- elife_poa_e37846_Figure_5_figure_supplement_3.pdf
- elife_poa_e37846_Figure_6_figure_supplement_1.pdf
- elife_poa_e37846_Figure_1_figure_supplement_1.pdf
- elife_poa_e37846_Figure_6_figure_supplement_1_source_data_1.xlsx
- elife_poa_e37846_Figure_5_figure_supplement_2.pdf
- elife_poa_e37846_Figure_5_figure_supplement_4_source_data_1.xlsx
- elife_poa_e37846_Supplementary_file_3.docx
- elife_poa_e37846_Figure_3_figure_supplement_4.pdf
- elife_poa_e37846_Figure_3_figure_supplement_3.pdf
- elife_poa_e37846_Figure_4_figure_supplement_1_source_data_1.xlsx
- elife_poa_e37846_Figure_2_source_data_1.xlsx
- elife_poa_e37846_Transparent_Reporting_File.pdf
- elife_poa_e37846_Figure_5_figure_supplement_4.pdf
- elife_poa_e37846_Figure_1_figure_supplement_1_source_data_1.xlsx
