# Supplementary material for: PPP1R35 is a novel centrosomal protein that regulates centriole length in concert with the microcephaly protein RTTN
Source: eLife journal article supplement (doi:10.7554/elife.37846), 2018-08-31
Supplement: supp [file elife-37846-supp-v1.zip › elife_poa_e37846_Figure_1_figure_supplement_1_source_data_1.xlsx]

## Sheet: Fig 1- figure supplement 1b
Figure 1- figure supplement 1b Source Data
CEP152 spots
GFP-PPP1R35 U2OS				WT U2OS
	Raw Numbers	Percentage			Raw Numbers	Percentage			GFP-PPP1R35		WT U2OS
Replicate 1	Neg. Control	Neg. Control		Replicate 1	Neg. Control	Neg. Control		Percentages	Avg	St. Dev.	Avg	St. Dev.
Total Cells	285			Total Cells	775			0 spots	3.79908	2.73293	2.36366	2.452
0 spots	24	8.42105		0 spots	9	1.16129		1 spots	27.9198	3.36166	27.9183	5.01299
1 spots	70	24.5614		1 spots	219	28.2581		2 spots	64.1309	4.78781	66.9926	2.6566
2 spots	185	64.9123		2 spots	530	68.3871		> 2 spots	4.15029	2.8107	2.72543	1.98361
> 2 spots	6	2.10526		> 2 spots	17	2.19355
Total > 1 spots	191	67.0175		2 or more spots	547	70.5806
	Raw Numbers	Percentage			Raw Numbers	Percentage
Replicate 2	Neg. Control	Neg. Control		Replicate 2	Neg. Control	Neg. Control
Total Cells	100			Total Cells	598
0 spots	4	4		0 spots	10	1.67224
1 spots	24	24		1 spots	184	30.7692
2 spots	71	71		2 spots	394	65.8863
> 2 spots	1	1		> 2 spots	10	1.67224
Total > 1 spots	72	72		2 or more spots	404	67.5585
	Raw Numbers	Percentage			Raw Numbers	Percentage
Replicate 3	Neg. Control	Neg. Control		Replicate 3	Neg. Control	Neg. Control
Total Cells	77			Total Cells	263
0 spots	2	2.5974		0 spots	2	0.760456
1 spots	24	31.1688		1 spots	68	25.8555
2 spots	44	57.1429		2 spots	190	72.2433
> 2 spots	7	9.09091		> 2 spots	3	1.14068
Total > 1 spots	51	66.2338		2 or more spots	193	73.384
	Raw Numbers	Percentage			Raw Numbers	Percentage
Replicate 4	Neg. Control	Neg. Control		Replicate 4	Neg. Control	Neg. Control
Total Cells	255			Total Cells	255
0 spots	16	6.27451		0 spots	3	1.17647
1 spots	81	31.7647		1 spots	81	31.7647
2 spots	152	59.6078		2 spots	166	65.098
> 2 spots	6	2.35294		> 2 spots	5	1.96078
Total > 1 spots	158	61.9608		2 or more spots	171	67.0588
	Raw Numbers	Percentage			Raw Numbers	Percentage
Replicate 5	Neg. Control	Neg. Control		Replicate 5	Neg. Control	Neg. Control
Total Cells	400			Total Cells	286
0 spots	13	3.25		0 spots	7	2.44755
1 spots	99	24.75		1 spots	82	28.6713
2 spots	271	67.75		2 spots	182	63.6364
> 2 spots	17	4.25		> 2 spots	15	5.24476
Total > 1 spots	288	72		2 or more spots	197	68.8811
	Raw Numbers	Percentage			Raw Numbers	Percentage
Replicate 6	Neg. Control	Neg. Control		Replicate 6	Neg. Control	Neg. Control
Total Cells	133			Total Cells	562
0 spots	1	0.75188		0 spots	48	8.54093
1 spots	39	29.3233		1 spots	100	17.7936
2 spots	88	66.1654		2 spots	382	67.9715
> 2 spots	5	3.7594		> 2 spots	32	5.69395
Total > 1 spots	93	69.9248		2 or more spots	414	73.6655
	Raw Numbers	Percentage			Raw Numbers	Percentage
Replicate 7	Neg. Control	Neg. Control		Replicate 7	Neg. Control	Neg. Control
Total Cells	154			Total Cells	377
0 spots	2	1.2987		0 spots	5	1.32626
1 spots	46	29.8701		1 spots	119	31.565
2 spots	96	62.3377		2 spots	250	66.313
> 2 spots	10	6.49351		> 2 spots	3	0.795756
Total > 1 spots	106	68.8312		2 or more spots	253	67.1088
					Raw Numbers	Percentage
				Replicate 8	Neg. Control	Neg. Control
				Total Cells	122
				0 spots	4	3.27869
				1 spots	28	22.9508
				2 spots	84	68.8525
				> 2 spots	6	4.91803
				2 or more spots	90	73.7705
					Raw Numbers	Percentage
				Replicate 9	Neg. Control	Neg. Control
				Total Cells	110
				0 spots	1	0.909091
				1 spots	37	33.6364
				2 spots	71	64.5455
				> 2 spots	1	0.909091
				2 or more spots	72	65.4545
