# Supplementary material for: PPP1R35 is a novel centrosomal protein that regulates centriole length in concert with the microcephaly protein RTTN
Source: eLife journal article supplement (doi:10.7554/elife.37846), 2018-08-31
Supplement: supp [file elife-37846-supp-v1.zip › elife_poa_e37846_Figure_1_source_data_1.xlsx]

## Sheet: Fig 1F and 1G
Figure 1D and 1E Source Data
Normalized Data and Fits: Centrosome
	CENT1	CENT2	CENT3	CENT4	CENT5	CENT6	CENT7	CENT8	CENT9	CENT10	CENT11	CENT12	CENT13	CENT14	CENT15	CENT16	CENT17	CENT18	CENT19	CENT20
Time	Data	Data	Data	Data	Data	Data	Data	Data	Data	Data	Data	Data	Data	Data	Data	Data	Data	Data	Data	Data	Time	Average	St. Dev.
0	0.988963	0.941076	1	0.838259	0.834261	1	0.826555	0.876445	0.758002	0.970865	1	0.966415	0.824994	0.773602	0.863867	1	1	0.991905	0.889792	0.941203	0	0.91431	0.0834586
0.499	0.967809	1	0.996518	0.891093	0.958863	0.931415	1	0.853527	1	0.793273	0.933471	0.877141	0.766399	0.855022	1	0.95538	0.799458	0.90953	0.964225	0.927376	0.499	0.919025	0.0741308
0.999	0.967893	0.942336	0.841869	0.861538	0.985692	0.951469	0.971356	1	0.934689	0.741859	0.885021	1	0.97174	0.891441	0.963076	0.992459	0.981159	0.912512	1	0.945209	0.999	0.937066	0.0656293
1.499	1	0.883349	0.920485	1	0.919515	0.94215	0.942396	0.901554	0.723832	0.685518	0.898501	0.933882	1	1	0.815784	0.99824	0.885955	0.903991	0.913118	0.967242	1.499	0.911776	0.0863648
1.999	0.842642	0.98017	0.995508	0.824089	1	0.851648	0.923247	0.915305	0.724697	1	0.986599	0.923261	0.961887	0.717699	0.835464	0.914907	0.951042	1	0.819421	1	1.999	0.908379	0.0905046
3.445	0.338796	0.259868	0.306155	0.248583	0.470588	0.166617	0.307327	0.409526	0.347967	0.547772	0.314567	0.427902	0.515426	0.245883	0.418746	0.356712	0.266486	0.369124	0.440178	0.372876	3.445	0.356555	0.0969396
3.527	0.364883	0.28763	0.375786	0.359717	0.488275	0.150514	0.406077	0.359904	0.399438	0.544344	0.344223	0.434982	0.523464	0.232197	0.40637	0.312343	0.234941	0.30294	0.310313	0.413452	3.527	0.36259	0.0975879
3.606	0.327759	0.285993	0.411388	0.293117	0.481121	0.213061	0.346574	0.444002	0.482266	0.531277	0.369836	0.468663	0.462276	0.281605	0.387705	0.31825	0.283043	0.346116	0.359193	0.444014	3.606	0.376863	0.0858154
3.685	0.398495	0.329367	0.460916	0.301012	0.517289	0.18339	0.374585	0.464328	0.480104	0.551842	0.367616	0.520333	0.458387	0.315008	0.49158	0.263575	0.261062	0.35691	0.316341	0.46456	3.685	0.393835	0.102125
3.764	0.435535	0.299024	0.465521	0.311134	0.469992	0.198226	0.406552	0.369271	0.487457	0.585476	0.384902	0.494115	0.456313	0.234516	0.405762	0.301031	0.339994	0.331487	0.369676	0.485495	3.764	0.391574	0.0964832
3.842	0.376254	0.304312	0.500337	0.371457	0.494634	0.212241	0.420794	0.401156	0.461289	0.608398	0.412814	0.567888	0.594504	0.278126	0.408196	0.287582	0.236369	0.313592	0.33246	0.450927	3.842	0.401667	0.114136
3.921	0.393562	0.339125	0.536276	0.283603	0.486486	0.213136	0.372527	0.428458	0.360294	0.667309	0.421775	0.470194	0.495981	0.267687	0.440454	0.292358	0.320868	0.373242	0.34504	0.516896	3.921	0.401264	0.108053
4	0.410619	0.28209	0.496518	0.41498	0.473569	0.229835	0.43662	0.427461	0.587587	0.59383	0.461581	0.506172	0.387607	0.313384	0.474133	0.323529	0.312018	0.373669	0.302975	0.533824	4	0.4171	0.101761
4.079	0.486789	0.306012	0.481806	0.307692	0.526033	0.231102	0.326001	0.491032	0.446799	0.629606	0.432559	0.486365	0.682914	0.227093	0.554068	0.357215	0.378961	0.300525	0.345695	0.56781	4.079	0.428304	0.128577
4.158	0.434866	0.379855	0.446541	0.341903	0.472576	0.215968	0.422852	0.469908	0.459343	0.742502	0.486401	0.516123	0.581799	0.294131	0.446338	0.393414	0.359121	0.334185	0.361945	0.56206	4.158	0.436092	0.114155
4.237	0.439214	0.310859	0.558962	0.294939	0.38752	0.207917	0.359709	0.573934	0.506488	0.716581	0.453097	0.551239	0.42909	0.297379	0.563603	0.386124	0.377534	0.326658	0.283711	0.57944	4.237	0.4302	0.13052
4.316	0.464632	0.334718	0.515723	0.284413	0.563394	0.250857	0.399905	0.461937	0.431661	0.568123	0.499167	0.509903	0.519316	0.294595	0.432745	0.315611	0.338995	0.422383	0.347399	0.530271	4.316	0.424287	0.0986359
4.395	0.482943	0.356689	0.59288	0.234211	0.428855	0.2314	0.470328	0.553806	0.483564	0.66581	0.452779	0.497943	0.516204	0.222918	0.538852	0.334087	0.265772	0.32538	0.360765	0.532468	4.395	0.427383	0.129266
4.474	0.446154	0.345546	0.611186	0.377935	0.66713	0.232593	0.386454	0.459346	0.602292	0.633676	0.49996	0.546168	0.544205	0.331014	0.506594	0.308824	0.287611	0.300099	0.477526	0.59359	4.474	0.457895	0.130676
4.552	0.538127	0.348505	0.590521	0.397368	0.474165	0.257716	0.428391	0.428258	0.488106	0.659169	0.453017	0.52129	0.430127	0.338205	0.313248	0.429487	0.344847	0.322681	0.401258	0.576274	4.552	0.437038	0.103522
4.631	0.573244	0.296317	0.518756	0.451619	0.48907	0.240644	0.465897	0.489039	0.538279	0.782134	0.454365	0.511626	0.552502	0.21248	0.453845	0.332956	0.328718	0.395966	0.375966	0.612651	4.631	0.453804	0.134263
4.71	0.436037	0.352723	0.587826	0.357895	0.633545	0.22976	0.439943	0.494022	0.401384	0.74036	0.430814	0.454598	0.453721	0.261656	0.518158	0.379085	0.277476	0.42849	0.389202	0.607611	4.71	0.443715	0.128056
4.789	0.427592	0.317092	0.518419	0.385628	0.470787	0.19666	0.469062	0.415703	0.442258	0.775493	0.520339	0.558033	0.533575	0.302714	0.415906	0.35734	0.287182	0.341003	0.340322	0.592751	4.789	0.433393	0.129671
4.868	0.529766	0.388983	0.592318	0.385425	0.564785	0.2727	0.381864	0.453766	0.571367	0.688089	0.44366	0.557841	0.60643	0.25145	0.505173	0.40083	0.284613	0.367703	0.297078	0.562706	4.868	0.455327	0.126878
4.947	0.441806	0.256594	0.575022	0.37753	0.494436	0.209706	0.394524	0.514149	0.437067	0.634747	0.420902	0.588556	0.495722	0.318952	0.504971	0.349045	0.36797	0.402216	0.324204	0.590683	4.947	0.43494	0.115206
7.451	0.507441	0.362166	0.618037	0.423482	0.518084	0.280006	0.550087	0.355719	0.517301	0.677378	0.596067	0.614869	0.500907	0.403155	0.564415	0.350427	0.359834	0.461298	0.425501	0.596821	7.451	0.48415	0.110507
9.951	0.544064	0.430469	0.632075	0.435223	0.681638	0.263307	0.553094	0.610403	0.568772	0.566195	0.650781	0.658406	0.438424	0.365808	0.511057	0.453117	0.364116	0.397103	0.49063	0.663695	9.951	0.513919	0.118223
12.451	0.695234	0.4226	0.568284	0.36498	0.613871	0.310347	0.488685	0.534874	0.532656	0.631962	0.600904	0.547603	0.66658	0.247506	0.556502	0.367521	0.453754	0.411447	0.403224	0.686309	12.451	0.505242	0.128546
14.951	0.676421	0.372742	0.605234	0.391903	0.556836	0.300805	0.565279	0.424472	0.553633	0.620394	0.579098	0.697828	0.606171	0.316632	0.477379	0.417169	0.474165	0.451924	0.427074	0.735026	14.951	0.512509	0.125319
17.451	0.657023	0.410198	0.561995	0.417409	0.534579	0.330774	0.518911	0.599641	0.5891	0.722151	0.62723	0.639939	0.47161	0.221758	0.570298	0.437531	0.323294	0.445249	0.405451	0.624992	17.451	0.505457	0.130146
19.952	0.53888	0.319736	0.684299	0.395344	0.631955	0.337931	0.470169	0.570945	0.595804	0.670308	0.565776	0.660607	0.43246	0.203201	0.458511	0.511438	0.361833	0.471098	0.573581	0.712218	19.952	0.508305	0.137713
22.451	0.626254	0.390683	0.551438	0.463968	0.591614	0.307515	0.654059	0.525707	0.527033	0.668809	0.607961	0.750167	0.499093	0.39782	0.563197	0.414279	0.443192	0.431189	0.479492	0.711314	22.451	0.530239	0.117355
24.951	0.61806	0.375323	0.672731	0.39332	0.560811	0.259281	0.588542	0.564767	0.557093	0.697515	0.626834	0.731892	0.528649	0.264904	0.51268	0.336476	0.380959	0.538276	0.498886	0.684629	24.951	0.519581	0.141711
27.451	0.64908	0.399559	0.655323	0.394534	0.605525	0.305874	0.521127	0.414109	0.610727	0.689589	0.662358	0.596115	0.532279	0.411042	0.644756	0.395299	0.44205	0.4586	0.362731	0.735995	27.451	0.524334	0.129095
29.951	0.601839	0.415675	0.62208	0.32996	0.726749	0.352766	0.525083	0.592666	0.690744	0.808912	0.618032	0.677926	0.551724	0.348411	0.503753	0.454625	0.389523	0.420821	0.517888	0.708083	29.951	0.542863	0.140316
Centrosome Calculated Variables
	CENT1	CENT2	CENT3	CENT4	CENT5	CENT6	CENT7	CENT8	CENT9	CENT10	CENT11	CENT12	CENT13	CENT14	CENT15	CENT16	CENT17	CENT18	CENT19	CENT20	Average	St. Dev.
Amplitude1	-9.3123	-4.8992	-7.1285	-1.6907	-2.052	-5.0199	-3.6371	-1.8213	-2.0123	-2.4818	-9.9827	-6.2478	-0.3366	-0.7893	-1.7468	-2.6816	-2.6257	-2.6557	-3.0865	-13.1137	-4.16607	3.39153
Tau1	2.0389	1.8589	0.6258	1.1064	2.9408	2.3266	2.4466	1.0806	2.8856	0.4135	1.8555	3.304	0.6811	1.343	1.472	1.9973	2.7475	4.2329	6.4186	1.1113	2.14434	1.40786	s
Final Value	22.0951	18.4715	16.2496	5.9103	9.1275	12.3514	10.2829	7.782	8.0287	9.5492	23.088	20.8474	6.0107	4.041	7.8513	9.9081	8.4355	9.6154	10.8333	31.6321	12.6055	7.14398
Half-Life	1.4133	1.2885	0.4338	0.7669	2.0384	1.6127	1.6959	0.749	2.0001	0.2866	1.2861	2.2901	0.4721	0.9309	1.0203	1.3844	1.9044	2.934	4.449	0.7703	1.48634	0.97584	s
Ampl. immobile	11.8436	26.4124	8.9486	7.0719	4.9451	24.9896	7.2582	5.7989	3.3695	2.0972	12.2198	8.3949	4.378	6.8334	5.2874	13.1121	10.8211	10.1578	10	12.4131	9.81763	6.28766
Fraction immobile	0.5413	0.8102	0.5238	0.7582	0.7039	0.8143	0.6171	0.7768	0.5098	0.5196	0.52	0.5269	0.979	0.8852	0.7558	0.8997	0.7899	0.8438	0.9228	0.462	0.708005	0.165051
PreBleach	33.9387	44.8839	25.1982	12.9821	14.0726	37.3411	17.5411	13.581	11.3982	11.6464	35.3077	29.2423	10.3887	10.8744	13.1387	23.0202	19.2565	19.7732	20.8333	44.0452	22.4232	11.3097
FirstPost	12.0595	12.2857	8.1131	3.6548	7.0476	6.6518	5.7798	6.1161	4.7887	7.6101	11.8065	13.3095	5.9167	3.1548	6.1429	8.4464	5.5565	7.7351	9.997	17.1756	8.16741	3.5778
LastPost	21.4226	19.6518	16.4851	4.8512	10.8839	14.0833	9.875	8.8512	9.506	11.2381	23.1964	21.0863	6.3333	4.4702	7.3899	10.7649	8.122	8.8185	11.7619	32.6161	13.0704	7.22644
Normalized Data and Fits: Cytosol
	Cyt1	Cyt2	Cyt3	Cyt4	Cyt5	Cyt6	Cyt7	Cyt8	Cyt9	Cyt10	Cyt11	Cyt12	Cyt13	Cyt14	Cyt15	Cyt16	Cyt17	Cyt18	Cyt19	Cyt20
Time	Data	Data	Data	Data	Data	Data	Data	Data	Data	Data	Data	Data	Data	Data	Data	Data	Data	Data	Data	Data	Time	Data Average	Data St. Dev.
0	0.850354	0.962633	0.863874	1	0.859621	0.956726	0.908531	0.815902	0.842846	0.962818	0.926113	1	0.927479	1	0.970581	0.787842	0.919038	1	0.858274	0.945441	0	0.917904	0.0663541
0.498	0.92273	0.824081	1	0.906005	0.885303	0.827469	0.753306	0.819572	0.916341	0.882173	0.919284	0.980671	0.989002	0.897202	0.715457	0.787842	0.830057	0.92238	1	1	0.498	0.888944	0.0842172
0.998	0.968448	0.899739	0.643106	0.92624	0.833804	0.899153	0.881905	0.729969	0.759447	0.88438	0.833925	0.932713	0.752707	0.923758	0.664577	0.879635	0.875065	0.924239	0.761635	0.977016	0.998	0.847573	0.0972886
1.498	1	0.862833	0.619983	0.928525	0.931424	0.722484	0.858721	0.733945	0.733125	0.82292	0.944278	0.893765	0.765252	0.916334	0.754762	0.687842	0.878686	0.773414	0.971396	0.917947	1.498	0.835882	0.105724
1.998	0.986607	0.888052	0.832897	0.98205	0.7183	0.798683	0.806013	0.715596	0.95387	0.94618	0.665938	0.888824	0.718336	0.930611	0.803955	0.96535	0.96327	0.84871	0.968487	0.816776	1.998	0.859925	0.102214
3.38	0.530457	0.524835	0.432373	0.545039	0.58572	0.537912	0.602427	0.508563	0.469377	0.65348	0.585359	0.637407	0.605602	0.563392	0.412587	0.611246	0.624935	0.579596	0.590498	0.580711	3.38	0.559076	0.064967
3.458	0.590856	0.6497	0.524433	0.625163	0.579131	0.542051	0.663648	0.679817	0.53792	0.568761	0.623873	0.665892	0.645987	0.830954	0.461056	0.618237	0.644594	0.644899	0.591467	0.471915	3.458	0.608018	0.0818033
3.541	0.694527	0.597263	0.621291	0.825392	0.624849	0.516463	0.637747	0.549541	0.686995	0.683701	0.63398	0.690743	0.734662	0.957453	0.579214	0.660486	0.613295	0.574715	0.695055	0.644399	3.541	0.661089	0.0981167
3.62	0.659627	0.567123	0.722949	0.587631	0.763614	0.539229	0.654773	0.59052	0.55043	0.808489	0.651325	0.697573	0.679842	0.882638	0.560164	0.677204	0.740817	0.711829	0.661926	0.62743	3.62	0.666757	0.089777
3.698	0.629491	0.611718	0.642234	0.769909	0.771279	0.501787	0.694258	0.595413	0.768309	0.706621	0.736411	0.710943	0.806152	0.833238	0.632023	0.60152	0.68598	0.671624	0.606173	0.717646	3.698	0.684636	0.0831045
3.777	0.847521	0.58819	0.72164	0.755222	0.795751	0.513641	0.582322	0.698165	0.808965	0.716129	0.602568	0.742189	0.689466	0.79783	0.57198	0.771429	0.671236	0.701604	0.621364	0.628719	3.777	0.691296	0.091964
3.856	0.715518	0.73566	0.74171	0.748695	0.753126	0.736595	0.615287	0.596636	0.608548	0.804244	0.638896	0.795088	0.777969	0.726442	0.615626	0.606383	0.644335	0.660702	0.589367	0.65965	3.856	0.688524	0.0718878
3.935	0.740502	0.675688	0.410558	0.670692	0.772489	0.597366	0.709473	0.61896	0.690904	0.747878	0.69817	0.828949	0.75855	0.758138	0.744876	0.669605	0.783756	0.620033	0.720265	0.608635	3.935	0.691274	0.0913956
4.014	0.749388	0.621098	0.601222	0.737924	0.708081	0.622766	0.607318	0.5737	0.616367	0.789304	0.72726	0.7714	0.795841	0.83181	0.652279	0.87234	0.733833	0.695096	0.655947	0.68403	4.014	0.70235	0.083677
4.093	0.732131	0.696755	0.553665	0.679014	0.806508	0.577611	0.583771	0.74159	0.782121	0.675042	0.692843	0.870077	0.818869	0.805825	0.809501	0.664134	0.762804	0.790844	0.69958	0.719257	4.093	0.723097	0.0862394
4.172	0.642627	0.465631	0.591623	0.62859	0.822106	0.726811	0.577975	0.772783	0.535314	0.803226	0.697487	0.730562	0.71868	0.828669	0.657825	0.652888	0.649509	0.891471	0.596477	0.818816	4.172	0.690454	0.110674
4.251	0.72595	0.646317	0.65445	0.682278	0.82735	0.502164	0.556783	0.678899	0.816784	0.772156	0.644906	0.866589	0.709228	0.817818	0.664336	0.871429	0.79462	0.677667	0.736425	0.633015	4.251	0.713958	0.0994418
4.33	0.786993	0.796094	0.585079	0.853133	0.689391	0.674882	0.620721	0.557798	0.692989	0.848387	0.73723	0.847115	0.860629	0.71245	0.799373	0.578116	0.596741	0.776667	0.752909	0.770164	4.33	0.726843	0.0990334
4.408	0.84868	0.846994	0.40096	0.718505	0.766438	0.613358	0.656041	0.728135	0.570758	0.732937	0.742284	0.853946	0.809761	0.861508	0.707741	0.58541	0.748836	0.708808	0.68552	0.754377	4.408	0.71705	0.112983
4.487	0.761108	0.788098	0.835515	0.64654	0.830846	0.694638	0.705307	0.774312	0.78577	0.707131	0.625922	0.746548	0.705963	0.772416	0.677357	0.622492	0.872219	0.721357	0.843083	0.725593	4.487	0.742111	0.071839
4.566	0.82756	0.717054	0.608202	0.991025	0.761328	0.617686	0.638652	0.66208	0.777952	0.774703	0.628107	0.744369	0.833133	0.825528	0.728237	0.637994	0.787636	0.901232	0.78426	0.644399	4.566	0.744557	0.102854
4.645	0.806053	0.767184	0.651396	0.812663	0.606293	0.708749	0.808187	0.713456	0.775085	0.824448	0.759765	0.802645	0.724179	0.625642	0.803231	0.562918	0.683394	0.689519	0.763575	0.614542	4.645	0.725146	0.0799467
4.724	0.798068	0.79917	0.635689	0.741841	0.72704	0.582502	0.782286	0.519878	0.890018	0.821902	0.776291	0.909316	0.693246	0.74072	0.647215	0.736778	0.693223	0.918197	0.653361	0.794329	4.724	0.743053	0.104426
4.803	0.757888	0.777641	0.691972	0.747063	0.831653	0.549012	0.738453	0.620795	0.693771	0.736163	0.667167	0.835053	0.894312	0.67076	0.632023	0.782067	0.703052	0.721822	0.728992	0.643325	4.803	0.721149	0.0813583
4.882	0.618158	0.689067	0.715532	0.884465	0.745462	0.576294	0.762181	0.734557	0.637998	0.75382	0.7472	0.92007	0.865784	0.88064	0.673258	0.69848	0.831609	0.701371	0.608597	0.685104	4.882	0.736482	0.0976106
7.386	0.73123	0.838382	0.726876	0.920529	0.869571	0.645532	0.657308	0.67156	0.706802	0.898981	0.750205	0.851911	0.810277	0.776413	0.709187	0.896657	0.802897	0.80897	0.806238	0.907421	7.386	0.789347	0.0867366
9.886	0.968191	0.962786	0.558028	0.854439	0.970822	0.703104	0.884441	1	0.653896	0.94584	0.838978	0.90699	0.814057	0.87293	0.763443	0.833131	0.81014	0.69742	0.839043	0.939963	9.886	0.840882	0.117841
12.386	0.763426	0.965401	0.783159	0.866841	0.851956	0.787959	0.915595	0.689297	0.861089	0.821392	1	0.952478	0.803231	0.822102	1	0.957751	0.81195	0.884034	0.728184	0.887123	12.386	0.857648	0.0883228
14.886	0.917321	0.800246	0.662304	0.991025	0.848191	0.810913	0.751132	0.826606	0.817566	0.834126	0.810981	0.94216	0.807527	0.850086	0.759344	0.854407	0.824884	0.74785	0.840498	0.86575	14.886	0.828146	0.0715219
17.385	0.859498	0.855759	0.787522	0.832898	0.802205	0.618815	0.704401	0.836086	0.857701	0.912224	0.781344	0.877343	0.954975	0.922045	0.676393	0.798784	0.828246	0.802696	0.855042	0.859091	17.385	0.821153	0.0814295
19.886	0.988152	0.896356	0.418848	0.871084	0.903994	0.878457	0.909799	0.804587	0.825124	0.760781	0.840481	0.901177	0.764393	0.789834	0.732095	0.834043	0.867822	0.763653	0.793956	0.71045	19.886	0.812754	0.11607
22.386	0.76407	0.787175	0.756108	0.995594	1	0.818062	0.767433	0.682263	0.775085	0.891511	0.80183	0.937073	0.846194	0.840377	0.872679	1	0.849457	0.856147	0.787492	0.752658	22.386	0.83906	0.0892081
24.886	0.913715	0.788098	0.815445	0.878916	0.906145	0.635372	0.75729	0.868502	0.76909	0.835654	0.873122	0.903212	0.982299	0.807539	0.921871	0.973252	0.686756	0.901232	0.828701	0.780475	24.886	0.841334	0.0891233
27.386	0.914359	0.885591	0.878272	0.832082	0.906548	0.739229	1	0.798471	1	0.976231	0.827096	0.852056	0.800481	0.781839	0.625271	0.785714	0.783756	0.851731	0.835003	0.888304	27.386	0.848102	0.0899885
29.886	0.786091	1	0.615183	0.794223	0.962888	1	0.869045	0.723853	0.986187	1	0.849358	0.943613	1	0.845231	0.827104	0.949848	1	0.860795	0.914674	0.792826	29.886	0.886046	0.108401
Cytosol Calculated Variables
	Cyt1	Cyt2	Cyt3	Cyt4	Cyt5	Cyt6	Cyt7	Cyt8	Cyt9	Cyt10	Cyt11	Cyt12	Cyt13	Cyt14	Cyt15	Cyt16	Cyt17	Cyt18	Cyt19	Cyt20	Average	St. Dev.
Amplitude1	-5.7119	-6.3601	-0.9671	-4.6431	-5.2961	-3.7848	-3.743	-2.0461	-2.9096	-3.8275	-4.8119	-5.3002	-3.4473	-2.8318	-4.0495	-2.6367	-2.1432	-2.9085	-4.0395	-7.0822	-3.927	1.53651
Tau1	1.0679	1.4114	1.2672	1.299	1.8178	6.6598	3.198	2.016	1.1207	1.4965	2.3911	0.8437	0.9333	0.0039	0.5384	3.8848	1.3929	0.725	1.674	1.4371	1.75892	1.45111	s
Final Value	19.8351	17.0464	4.7796	16.1314	19.9864	12.7928	13.7865	7.7292	9.4328	15.5363	18.4042	18.5548	14.8423	8.5319	9.5391	8.8237	9.5247	10.4502	15.1895	23.1028	13.701	4.94886
Half-Life	0.7402	0.9783	0.8783	0.9004	1.26	4.6162	2.2167	1.3974	0.7768	1.0373	1.6574	0.5848	0.6469	0.0027	0.3732	2.6927	0.9655	0.5025	1.1603	0.9962	1.21919	1.00583	s
Ampl. immobile	2.0185	0.1298	0.6228	1.1686	-1.268	0.509	0.0438	-0.3036	0.1726	0.2351	0.291	0.6792	-0.4584	1.1985	0.1109	-0.7778	0.7527	0.9956	1.6057	2.7085	0.521725	0.938325
Fraction immobile	0.2104	0.0185	0.2539	0.1588	-0.2204	0.1062	0.0111	-0.1226	0.0406	0.0545	0.049	0.1099	-0.1177	0.3106	0.0243	-0.3775	0.2438	0.2475	0.2712	0.2787	0.07754	0.182597
PreBleach	21.8536	17.1762	5.4024	17.3	18.7185	13.3018	13.8304	7.4256	9.6054	15.7714	18.6952	19.2339	14.3839	9.7304	9.65	8.0458	10.2774	11.4458	16.7952	25.8113	14.2227	5.30109
FirstPost	12.2589	10.1577	2.9494	9.9405	12.9643	8.5089	9.8988	4.9494	5.3601	11.4554	12.756	13.0536	10.4881	5.872	5.0923	5.9851	7.1905	7.4226	10.875	16.0923	9.16354	3.46294
LastPost	18.1667	19.3542	4.1964	14.4851	21.3125	15.8185	14.2798	7.0446	11.2619	17.5298	18.5089	19.3244	17.3185	8.8095	10.2083	9.3006	11.506	11.0238	16.8452	21.9702	14.4132	4.99443
