# Supplementary material for: PPP1R35 is a novel centrosomal protein that regulates centriole length in concert with the microcephaly protein RTTN
Source: eLife journal article supplement (doi:10.7554/elife.37846), 2018-08-31
Supplement: supp [file elife-37846-supp-v1.zip › elife_poa_e37846_Figure_2_source_data_1.xlsx]

## Sheet: Fig 2D and 2E
Figure 2D and 2E Source Data
All analyzed centrosomes were in interphase and on the same z-plane; all distances are in nanometers.
GFP-c7orf47 to SAS6				GFP-c7orf47 to POC1B				GFP-c7orf47 to CETN1				GFP-c7orf47 to CEP135				GFP-c7orf47 to POC5				GFP-c7orf47 to CPAP				GFP-c7orf47 to CEP250
Average:	120.5	36.8921		Average:	140.56	58.4495		Average:	233.5	51.3722		Average:	91.65	40.1933		Average:	158.556	52.7967		Average:	61.1034	34.0497		Average:	171.6	53.8765
Centrosome #	Distance (nm)			Centrosome #	Distance (nm)			Centrosome #	Distance (nm)			Centrosome #	Distance (nm)			Centrosome #	Distance (nm)			Centrosome #	Distance (um)			Centrosome #	Distance (um)
1	137			1	158			1	211			1	71			1	157			1	165			1	232
2	110			2	205			2	160			2	67			2	68			2	66			2	123
3	86			3	300			3	297			3	32			3	183			3	15			3	215
4	111			4	57			4	195			4	107			4	136			4	51			4	138
5	106			5	37			5	194			5	147			5	117			5	72			5	162
6	151			6	100			6	304			6	57			6	194			6	50			6	160
7	225			7	165			7	283			7	113			7	85			7	22			7	148
8	99			8	194			8	174			8	180			8	257			8	28			8	114
9	108			9	200			9	234			9	54			9	78			9	86			9	64
10	148			10	159			10	248			10	70			10	171			10	74			10	125
11	146			11	82			11	271			11	93			11	195			11	43			11	245
12	125			12	125			12	153			12	145			12	193			12	125			12	150
13	177			13	136			13	225			13	90			13	133			13	50			13	212
14	140			14	202			14	166			14	106			14	175			14	51			14	257
15	66			15	97			15	193			15	134			15	225			15	64			15	252
16	96			16	196			16	311			16	86			16	122			16	90			16	109
17	98			17	89			17	273			17	114			17	121			17	62			17	151
18	125			18	152			18	224			18	30			18	237			18	52			18	201
19	95			19	176			19	291			19	93			19	150			19	117			19	161
20	145			20	140			20	263			20	44			20	159			20	34			20	213
21	92			21	94											21	117			21	37
22	65			22	89											22	126			22	63
				23	157											23	201			23	31
				24	123											24	193			24	71
				25	81											25	263			25	102
																26	131			26	35
																27	94			27	63
																				28	26
																				29	27
