# Supplementary material for: PPP1R35 is a novel centrosomal protein that regulates centriole length in concert with the microcephaly protein RTTN
Source: eLife journal article supplement (doi:10.7554/elife.37846), 2018-08-31
Supplement: supp [file elife-37846-supp-v1.zip › elife_poa_e37846_Figure_3_figure_supplement_2_source_data_1.xlsx]

## Sheet: Fig 3- figure supplement 2
Figure 3- figure supplement 2 Source Data
Summary of qPCR Data
Normalized against Neg. control siRNA; reference genes: RNA Pol II and TATA BP
Target: PPP1R35-1
Replicate	1	2	3	4	5	6	7	Average	St. Dev.	T-Test p-value
Neg. siRNA	1	1	1	1	1	1	1	1	0
PPP1R35-1 siRNA	0.273817	0.220913	0.20059	0.185321	0.353875	0.27542	0.208421	0.24548	0.0592454	4.54886e-08
PPP1R35-2 siRNA	0.0297768	0.0601158	0.0688572	0.0528032	0.0107051			0.0444516	0.0237956	9.2221e-08
Target: PPP1R35-2
Replicate	1	2	3	4	5	6	7	8	Average	St. Dev.	T-Test p-value
Neg. siRNA	1	1	1	1	1	1	1	1	1	0
PPP1R35-1 siRNA	0.20588	0.226459	0.181445	0.143476	0.18132	0.306749	0.282144	0.24002	0.220937	0.0583729	1.49264e-09
PPP1R35-2 siRNA	0.058963	0.0502386	0.0238586	0.0251641	0.0310955	0.0321377	0.0377272		0.0370264	0.0130987	1.24596e-12
