# Supplementary material for: PPP1R35 is a novel centrosomal protein that regulates centriole length in concert with the microcephaly protein RTTN
Source: eLife journal article supplement (doi:10.7554/elife.37846), 2018-08-31
Supplement: supp [file elife-37846-supp-v1.zip › elife_poa_e37846_Figure_3_figure_supplement_3_source_data_1.xlsx]

## Sheet: CETN1
CETN1
Replicate 1								Replicate 2								Averages and St. Dev. Of Percentages
	Raw Numbers			Percentage					Raw Numbers			Percentage												For Plot, cells with >1 spots
CETN1 96 hrs	Neg. Control	c7-1	c7-2	Neg. Control	20 pmol	40 pmol		CETN1 96 hrs	Neg. Control	c7-1	c7-2	Neg. Control	20 pmol	40 pmol		96 hrs	Neg. Control		c7-1		c7-2				Neg. Control		c7-1		c7-2
Total Cells	143	114	72					Total Cells	108	118	105					Total cells	251		232		177				Avg.	St. Dev.	Avg.	St. Dev.	Avg.	St. Dev.
0 spots	22	7	13	15.3846	6.14035	18.0556		0 spots	21	12	12	19.4444	10.1695	11.4286		0 spots	17.4145	2.87073	8.15492	2.84903	14.7421	4.68599		72 hrs	89.1	3.12	76.6	7.55	78.9	7.95
1 spots	22	28	21	15.3846	24.5614	29.1667		1 spots	3	26	41	2.77778	22.0339	39.0476		1 spots	9.0812	8.91438	23.2977	1.78722	34.1071	6.98689		96 hrs	73.5043	6.04365	68.5474	1.06182	51.1508	2.3009
2 spots	55	71	22	38.4615	62.2807	30.5556		2 spots	43	68	29	39.8148	57.6271	27.619		2 spots	39.1382	0.956911	59.9539	3.29058	29.0873	2.07642		120 hrs	87.3016	2.24478	59.1159	9.76304	52.9079	2.01211
> 2 spots	44	8	16	30.7692	7.01754	22.2222		> 2 spots	41	12	23	37.963	10.1695	21.9048		> 2 spots	34.3661	5.08674	8.59352	2.22876	22.0635	0.224478		144 hrs	88.1105	6.97625	50.9108	7.46663	44.6078	7.62566
																> 1 spots	73.5043	6.04365	68.5474	1.06182	51.1508	2.3009
	Raw Numbers			Percentage					Raw Numbers			Percentage
CETN1 120 hrs	Neg. Control	c7-1	c7-2	Neg. Control	20 pmol	40 pmol		CETN1 120 hrs	Neg. Control	c7-1	c7-2	Neg. Control	20 pmol	40 pmol		120 hrs	Neg. Control		c7-1		c7-2
Total Cells	112	103	127					Total Cells	108	113	101					Total cells	220		216		228
0 spots	8	12	34	7.14286	11.6505	26.7717		0 spots	5	27	15	4.62963	23.8938	14.8515		0 spots	5.88624	1.77712	17.7721	8.65733	20.8116	8.42883
1 spots	8	23	24	7.14286	22.3301	18.8976		1 spots	7	27	34	6.48148	23.8938	33.6634		1 spots	6.81217	0.467663	23.112	1.10571	26.2805	10.4409
2 spots	31	49	29	27.6786	47.5728	22.8346		2 spots	62	48	29	57.4074	42.4779	28.7129		2 spots	42.543	21.0215	45.0253	3.60267	25.7738	4.15653
> 2 spots	65	19	40	58.0357	18.4466	31.4961		> 2 spots	34	11	23	31.4815	9.73451	22.7723		> 2 spots	44.7586	18.7767	14.0906	6.16038	27.1342	6.16865
																> 1 spots	87.3016	2.24478	59.1159	9.76304	52.9079	2.01211
	Raw Numbers			Percentage					Raw Numbers			Percentage
CETN1 144 hrs	Neg. Control	c7-1	c7-2	Neg. Control	20 pmol	40 pmol		CETN1 144 hrs	Neg. Control	c7-1	c7-2	Neg. Control	20 pmol	40 pmol		144 hrs	Neg. Control		c7-1		c7-2
Total Cells	107	105	104					Total Cells	115	107	102					Total cells	222		212		206
0 spots	16	22	27	14.9533	20.9524	25.9615		0 spots	3	21	25	2.6087	20.3883	24.5098		0 spots	8.78098	8.72893	20.6704	0.39883	25.2357	1.02653
1 spots	2	24	25	1.86916	22.8571	24.0385		1 spots	5	39	37	4.34783	37.8641	36.2745		1 spots	3.10849	1.75268	30.3606	10.6115	30.1565	8.65219
2 spots	34	36	31	31.7757	34.2857	29.8077		2 spots	76	44	24	66.087	42.7184	23.5294		2 spots	48.9313	24.2617	38.5021	5.96284	26.6686	4.43941
> 2 spots	55	23	21	51.4019	21.9048	20.1923		> 2 spots	31	3	16	26.9565	2.91262	15.6863		> 2 spots	39.1792	17.2855	12.4087	13.4295	17.9393	3.18625
																> 1 spots	88.1105	6.97625	50.9108	7.46663	44.6078	7.62566
24 to 48 hrs
Replicate 1								Replicate 2								Replicate 3								Averages and St. Dev. Of Percentages								For Plot, cells with >1 spots
	Raw Numbers			Percentage					Raw Numbers			Percentage					Raw Numbers			Percentage													Neg. Control		c7-1		c7-2
CETN1 24 hrs	Neg. Control	c7-1	c7-2	Neg. Control	20 pmol	40 pmol		CETN1 24 hrs	Neg. Control	c7-1	c7-2	Neg. Control	20 pmol	40 pmol		CETN1 24 hrs	Neg. Control	c7-1	c7-2	Neg. Control	20 pmol	40 pmol		24 hrs	Neg. Control		c7-1		c7-2				Avg.	St. Dev.	Avg.	St. Dev.	Avg.	St. Dev.
Total Cells	133	117	101					Total Cells	110	100	103					Total Cells	102	105	117					Total cells	345		322		321			24 hrs	89.2715	4.33725	89.3256	2.2331	93.9224	3.17407
0 spots	3	4	1	2.25564	3.4188	0.990099		0 spots	1	4	1	0.909091	4	0.970874		0 spots	4	2	0	3.92157	1.90476	0		0 spots	2.3621	1.50906	3.10786	1.08168	0.653658	0.566166		48 hrs	85.2899	4.04384	80.9552	3.29818	82.7778	6.26482
1 spots	17	6	6	12.782	5.12821	5.94059		1 spots	6	9	8	5.45455	9	7.76699		1 spots	7	9	3	6.86275	8.57143	2.5641		1 spots	8.36642	3.88825	7.56654	2.12251	5.4239	2.63965
2 spots	72	61	56	54.1353	52.1368	55.4455		2 spots	69	49	53	62.7273	49	51.4563		2 spots	54	60	64	52.9412	57.1429	54.7009		2 spots	56.6013	5.33877	52.7599	4.10704	53.8676	2.12115
> 2 spots	41	46	38	30.8271	39.3162	37.6238		> 2 spots	34	38	41	30.9091	38	39.8058		> 2 spots	37	34	50	36.2745	32.381	42.735		> 2 spots	32.6702	3.12167	36.5657	3.68339	40.0549	2.56473
																								> 1 spots	89.2715	4.33725	89.3256	2.2331	93.9224	3.17407
	Raw Numbers			Percentage					Raw Numbers			Percentage					Raw Numbers			Percentage
CETN1 48 hrs	Neg. Control	c7-1	c7-2	Neg. Control	20 pmol	40 pmol		CETN1 48 hrs	Neg. Control	c7-1	c7-2	Neg. Control	20 pmol	40 pmol		CETN1 48 hrs	Neg. Control	c7-1	c7-2	Neg. Control	20 pmol	40 pmol		48 hrs	Neg. Control		c7-1		c7-2
Total Cells	48	56	60					Total Cells	103	101	105					Total Cells	131	103	105					Total cells	282		260		270
0 spots	1	0	3	2.08333	0	5		0 spots	3	4	7	2.91262	3.9604	6.66667		0 spots	2	5	4	1.52672	4.85437	3.80952		0 spots	2.17422	0.697408	2.93825	2.58356	5.15873	1.43517
1 spots	4	10	8	8.33333	17.8571	13.3333		1 spots	16	19	17	15.534	18.8119	16.1905		1 spots	18	12	7	13.7405	11.6505	6.66667		1 spots	12.5359	3.7484	16.1065	3.88844	12.0635	4.88724
2 spots	24	29	28	50	51.7857	46.6667		2 spots	65	60	53	63.1068	59.4059	50.4762		2 spots	80	61	42	61.0687	59.2233	40		2 spots	58.0585	7.05287	56.805	4.34778	45.7143	5.30263
> 2 spots	19	17	21	39.5833	30.3571	35		> 2 spots	19	18	28	18.4466	17.8218	26.6667		> 2 spots	31	25	52	23.6641	24.2718	49.5238		> 2 spots	27.2314	11.0106	24.1503	6.26856	37.0635	11.5674
																								> 1 spots	85.2899	4.04384	80.9552	3.29818	82.7778	6.26482

## Sheet: SAS6
SAS6
24 to 48 hrs
Replicate 1								Replicate 2								Replicate 3								Averages and St. Dev. Of Percentages								For Plot, cells with >1 spots
	Raw Numbers			Percentage					Raw Numbers			Percentage					Raw Numbers			Percentage													Neg. Control		c7-1		c7-2
SAS6 24 hrs	Neg. Control	c7-1	c7-2	Neg. Control	20 pmol	40 pmol		SAS6 24 hrs	Neg. Control	c7-1	c7-2	Neg. Control	20 pmol	40 pmol		SAS6 24 hrs	Neg. Control	c7-1	c7-2	Neg. Control	20 pmol	40 pmol		24 hrs	Neg. Control		c7-1		c7-2				Avg.	St. Dev.	Avg.	St. Dev.	Avg.	St. Dev.
Total Cells	103	101	105					Total Cells	119	100	152					Total Cells	104	109	107					Total cells	326		310		364			24 hrs	54.8454	2.53083	47.6856	9.235	49.9112	6.75618
0 spots	30	43	40	29.1262	42.5743	38.0952		0 spots	28	29	46	23.5294	29	30.2632		0 spots	40	64	56	38.4615	58.7156	52.3364		0 spots	30.3724	7.54366	43.43	14.8763	40.2316	11.1906		48 hrs	55.4975	1.01427	46.7154	6.51385	46.0848	8.57597
1 spots	15	10	14	14.5631	9.90099	13.3333		1 spots	24	14	19	20.1681	14	12.5		1 spots	10	3	4	9.61538	2.75229	3.73832		1 spots	14.7822	5.27975	8.88443	5.69234	9.85722	5.31548
2 spots	57	48	50	55.3398	47.5248	47.619		2 spots	66	56	85	55.4622	56	55.9211		2 spots	52	41	47	50	37.6147	43.9252		2 spots	53.6007	3.11887	47.0465	9.20199	49.1551	6.14366
> 2 spots	1	0	1	0.970874	0	0.952381		> 2 spots	1	1	2	0.840336	1	1.31579		> 2 spots	2	1	0	1.92308	0.917431	0		> 2 spots	1.24476	0.591053	0.639144	0.555052	0.756057	0.679509
																								> 1 spots	54.8454	2.53083	47.6856	9.235	49.9112	6.75618
	Raw Numbers			Percentage					Raw Numbers			Percentage					Raw Numbers			Percentage
SAS6 48 hrs	Neg. Control	c7-1	c7-2	Neg. Control	20 pmol	40 pmol		SAS6 48 hrs	Neg. Control	c7-1	c7-2	Neg. Control	20 pmol	40 pmol		SAS6 48 hrs	Neg. Control	c7-1	c7-2	Neg. Control	20 pmol	40 pmol		48 hrs	Neg. Control		c7-1		c7-2
Total Cells	108	110	108					Total Cells	108	104	103					Total Cells	101	103	111					Total cells	317		317		322
0 spots	28	40	50	25.9259	36.3636	46.2963		0 spots	25	48	43	23.1481	46.1538	41.7476		0 spots	28	20	32	27.7228	19.4175	28.8288		0 spots	25.5989	2.30477	33.9783	13.5269	38.9576	9.0618
1 spots	19	19	12	17.5926	17.2727	11.1111		1 spots	23	14	19	21.2963	13.4615	18.4466		1 spots	18	28	17	17.8218	27.1845	15.3153		1 spots	18.9036	2.07534	19.3062	7.08386	14.9577	3.6808
2 spots	57	47	44	52.7778	42.7273	40.7407		2 spots	50	40	36	46.2963	38.4615	34.9515		2 spots	52	54	59	51.4851	52.4272	53.1532		2 spots	50.1864	3.43037	44.5387	7.15686	42.9485	9.29951
> 2 spots	4	4	2	3.7037	3.63636	1.85185		> 2 spots	10	2	5	9.25926	1.92308	4.85437		> 2 spots	3	1	3	2.9703	0.970874	2.7027		> 2 spots	5.31109	3.43883	2.17677	1.35073	3.13631	1.54751
																								> 1 spots	55.4975	1.01427	46.7154	6.51385	46.0848	8.57597

## Sheet: CPAP
CPAP
24 to 48 hrs
Replicate 1								Replicate 2								Replicate 3								Averages and St. Dev. Of Percentages								For Plot, cells with >1 spots
	Raw Numbers			Percentage					Raw Numbers			Percentage					Raw Numbers			Percentage													Neg. Control		c7-1		c7-2
CPAP 24 hrs	Neg. Control	c7-1	c7-2	Neg. Control	20 pmol	40 pmol		CPAP 24 hrs	Neg. Control	c7-1	c7-2	Neg. Control	20 pmol	40 pmol		CPAP 24 hrs	Neg. Control	c7-1	c7-2	Neg. Control	20 pmol	40 pmol		24 hrs	Neg. Control		c7-1		c7-2				Avg.	St. Dev.	Avg.	St. Dev.	Avg.	St. Dev.
Total Cells	109	104	99					Total Cells	119	117	113					Total Cells	102	102	101					Total cells	330		323		313			24 hrs	69.0048	3.60369	64.974	1.10217	65.0844	8.92339
0 spots	10	9	7	9.17431	8.65385	7.07071		0 spots	3	3	3	2.52101	2.5641	2.65487		0 spots	6	7	14	5.88235	6.86275	13.8614		0 spots	5.85922	3.32671	6.0269	3.12973	7.86232	5.64504		48 hrs	68.2827	6.42791	59.9637	10.2798	46.2119	8.10468
1 spots	28	27	31	25.6881	25.9615	31.3131		1 spots	30	37	25	25.2101	31.6239	22.1239		1 spots	25	31	28	24.5098	30.3922	27.7228		1 spots	25.136	0.592619	29.3259	2.97798	27.0533	4.63106
2 spots	70	63	55	64.2202	60.5769	55.5556		2 spots	84	77	83	70.5882	65.812	73.4513		2 spots	68	61	57	66.6667	59.8039	56.4356		2 spots	67.1584	3.21237	62.0643	3.26853	61.8142	10.0877
> 2 spots	1	5	6	0.917431	4.80769	6.06061		> 2 spots	2	0	2	1.68067	0	1.76991		> 2 spots	3	4	2	2.94118	3.92157	1.9802		> 2 spots	1.84643	1.022	2.90975	2.55857	3.27024	2.41882
																								> 1 spots	69.0048	3.60369	64.974	1.10217	65.0844	8.92339
	Raw Numbers			Percentage					Raw Numbers			Percentage					Raw Numbers			Percentage
CPAP 48 hrs	Neg. Control	c7-1	c7-2	Neg. Control	20 pmol	40 pmol		CPAP 48 hrs	Neg. Control	c7-1	c7-2	Neg. Control	20 pmol	40 pmol		CPAP 48 hrs	Neg. Control	c7-1	c7-2	Neg. Control	20 pmol	40 pmol		48 hrs	Neg. Control		c7-1		c7-2
Total Cells	112	103	104					Total Cells	101	109	101					Total Cells	124	111	108					Total cells	337		323		313
0 spots	11	11	14	9.82143	10.6796	13.4615		0 spots	3	5	16	2.9703	4.58716	15.8416		0 spots	3	4	18	2.41935	3.6036	16.6667		0 spots	5.07036	4.12376	6.29012	3.83309	15.3233	1.66424
1 spots	18	19	50	16.0714	18.4466	48.0769		1 spots	36	49	39	35.6436	44.9541	38.6139		1 spots	35	42	31	28.2258	37.8378	28.7037		1 spots	26.6469	9.88113	33.7462	13.7193	38.4648	9.68747
2 spots	81	68	38	72.3214	66.0194	36.5385		2 spots	57	52	42	56.4356	47.7064	41.5842		2 spots	84	61	53	67.7419	54.955	49.0741		2 spots	65.4997	8.17682	56.2269	9.22252	42.3989	6.3074
> 2 spots	2	5	2	1.78571	4.85437	1.92308		> 2 spots	5	3	4	4.9505	2.75229	3.9604		> 2 spots	2	4	6	1.6129	3.6036	5.55556		> 2 spots	2.78304	1.87906	3.73676	1.05734	3.81301	1.82072
																								> 1 spots	68.2827	6.42791	59.9637	10.2798	46.2119	8.10468

## Sheet: gTub
Gamma Tubulin
24 to 48 hrs
Replicate 1								Replicate 2								Replicate 3								Averages and St. Dev. Of Percentages								For Plot, cells with >1 spots
	Raw Numbers			Percentage					Raw Numbers			Percentage					Raw Numbers			Percentage													Neg. Control		c7-1		c7-2
gTub 24 hrs	Neg. Control	c7-1	c7-2	Neg. Control	20 pmol	40 pmol		gTub 24 hrs	Neg. Control	c7-1	c7-2	Neg. Control	20 pmol	40 pmol		gTub 24 hrs	Neg. Control	c7-1	c7-2	Neg. Control	20 pmol	40 pmol		24 hrs	Neg. Control		c7-1		c7-2				Avg.	St. Dev.	Avg.	St. Dev.	Avg.	St. Dev.
Total Cells	109	104	109					Total Cells	119	116	114					Total Cells	102	102	101					Total cells	330		322		324			24 hrs	76.1455	3.04154	76.1769	2.15481	76.1555	3.3098
0 spots	9	7	15	8.25688	6.73077	13.7615		0 spots	1	2	2	0.840336	1.72414	1.75439		0 spots	5	6	6	4.90196	5.88235	5.94059		0 spots	4.66639	3.71388	4.77909	2.67946	7.15215	6.09454		48 hrs	74.2275	8.5539	70.4859	6.08101	66.9963	7.39124
1 spots	20	18	14	18.3486	17.3077	12.844		1 spots	28	28	21	23.5294	24.1379	18.4211		1 spots	16	16	19	15.6863	15.6863	18.8119		1 spots	19.1881	3.98839	19.044	4.48538	16.6923	3.33844
2 spots	78	77	78	71.5596	74.0385	71.5596		2 spots	83	80	91	69.7479	68.9655	79.8246		2 spots	77	72	74	75.4902	70.5882	73.2673		2 spots	72.2659	2.93558	71.1974	2.59075	74.8838	4.36315
> 2 spots	2	2	2	1.83486	1.92308	1.83486		> 2 spots	7	6	0	5.88235	5.17241	0		> 2 spots	4	8	2	3.92157	7.84314	1.9802		> 2 spots	3.87959	2.02407	4.97954	2.96474	1.27169	1.10371
																								> 1 spots	76.1455	3.04154	76.1769	2.15481	76.1555	3.3098
	Raw Numbers			Percentage					Raw Numbers			Percentage					Raw Numbers			Percentage
gTub 48 hrs	Neg. Control	c7-1	c7-2	Neg. Control	20 pmol	40 pmol		gTub 48 hrs	Neg. Control	c7-1	c7-2	Neg. Control	20 pmol	40 pmol		gTub 48 hrs	Neg. Control	c7-1	c7-2	Neg. Control	20 pmol	40 pmol		48 hrs	Neg. Control		c7-1		c7-2
Total Cells	112	103	104					Total Cells	101	109	102					Total Cells	123	110	110					Total cells	336		322		316
0 spots	7	8	7	6.25	7.76699	6.73077		0 spots	3	4	3	2.9703	3.66972	2.94118		0 spots	3	4	7	2.43902	3.63636	6.36364		0 spots	3.88644	2.06407	5.02436	2.37525	5.34519	2.09002
1 spots	16	22	36	14.2857	21.3592	34.6154		1 spots	33	35	28	32.6733	32.1101	27.451		1 spots	23	22	23	18.6992	20	20.9091		1 spots	21.8861	9.5991	24.4898	6.63429	27.6585	6.8555
2 spots	86	68	56	76.7857	66.0194	53.8462		2 spots	60	64	68	59.4059	58.7156	66.6667		2 spots	95	77	77	77.2358	70	70		2 spots	71.1425	10.1666	64.9117	5.72318	63.5043	8.52861
> 2 spots	3	5	5	2.67857	4.85437	4.80769		> 2 spots	5	6	3	4.9505	5.50459	2.94118		> 2 spots	2	7	3	1.62602	6.36364	2.72727		> 2 spots	3.08503	1.6991	5.5742	0.757038	3.49205	1.14439
																								> 1 spots	74.2275	8.5539	70.4859	6.08101	66.9963	7.39124

## Sheet: CEP135
CEP135
24 to 48 hrs
Replicate 1								Replicate 2								Replicate 3								Averages and St. Dev. Of Percentages								For Plot, cells with >1 spots
	Raw Numbers			Percentage					Raw Numbers			Percentage					Raw Numbers			Percentage													Neg. Control		c7-1		c7-2
CEP135 24 hrs	Neg. Control	c7-1	c7-2	Neg. Control	20 pmol	40 pmol		CEP135 24 hrs	Neg. Control	c7-1	c7-2	Neg. Control	20 pmol	40 pmol		CEP135 24 hrs	Neg. Control	c7-1	c7-2	Neg. Control	20 pmol	40 pmol		24 hrs	Neg. Control		c7-1		c7-2				Avg.	St. Dev.	Avg.	St. Dev.	Avg.	St. Dev.
Total Cells	134	119	106					Total Cells	110	102	101					Total Cells	102	105	122					Total cells	346		326		329			24 hrs	75.2424	5.25129	73.24	4.88595	76.4631	9.62736
0 spots	2	5	0	1.49254	4.20168	0		0 spots	1	5	4	0.909091	4.90196	3.9604		0 spots	7	1	2	6.86275	0.952381	1.63934		0 spots	3.08812	3.28191	3.35201	2.10743	1.86658	1.98995		48 hrs	73.0544	4.03033	67.756	5.85773	70.3487	5.87107
1 spots	30	24	19	22.3881	20.1681	17.9245		1 spots	21	19	31	19.0909	18.6275	30.6931		1 spots	24	33	20	23.5294	31.4286	16.3934		1 spots	21.6695	2.30486	23.408	6.98858	21.6703	7.85132
2 spots	85	73	64	63.4328	61.3445	60.3774		2 spots	67	71	59	60.9091	69.6078	58.4158		2 spots	65	68	76	63.7255	64.7619	62.2951		2 spots	62.6891	1.5485	65.2381	4.15218	60.3628	1.93966
> 2 spots	17	17	23	12.6866	14.2857	21.6981		> 2 spots	21	7	7	19.0909	6.86275	6.93069		> 2 spots	6	3	24	5.88235	2.85714	19.6721		> 2 spots	12.5533	6.60529	8.00187	5.79882	16.1003	8.00547
																								> 1 spots	75.2424	5.25129	73.24	4.88595	76.4631	9.62736
	Raw Numbers			Percentage					Raw Numbers			Percentage					Raw Numbers			Percentage
CEP135 48 hrs	Neg. Control	c7-1	c7-2	Neg. Control	20 pmol	40 pmol		CEP135 48 hrs	Neg. Control	c7-1	c7-2	Neg. Control	20 pmol	40 pmol		CEP135 48 hrs	Neg. Control	c7-1	c7-2	Neg. Control	20 pmol	40 pmol		48 hrs	Neg. Control		c7-1		c7-2
Total Cells	49	54	59					Total Cells	103	103	110					Total Cells	129	105	106					Total cells	281		262		275
0 spots	1	2	2	2.04082	3.7037	3.38983		0 spots	0	4	7	0	3.8835	6.36364		0 spots	4	3	7	3.10078	2.85714	6.60377		0 spots	1.71386	1.57603	3.48145	0.548086	5.45241	1.79028
1 spots	10	18	14	20.4082	33.3333	23.7288		1 spots	29	31	33	28.1553	30.0971	30		1 spots	35	24	20	27.1318	22.8571	18.8679		1 spots	25.2318	4.20859	28.7625	5.36409	24.1989	5.58091
2 spots	32	24	34	65.3061	44.4444	57.6271		2 spots	62	64	64	60.1942	62.1359	58.1818		2 spots	74	53	65	57.3643	50.4762	61.3208		2 spots	60.9549	4.02517	52.3522	8.9937	59.0432	1.9918
> 2 spots	6	10	9	12.2449	18.5185	15.2542		> 2 spots	12	4	6	11.6505	3.8835	5.45455		> 2 spots	16	25	14	12.4031	23.8095	13.2075		> 2 spots	12.0995	0.396817	15.4038	10.3217	11.3054	5.16933
																								> 1 spots	73.0544	4.03033	67.756	5.85773	70.3487	5.87107
