# Supplementary material for: PPP1R35 is a novel centrosomal protein that regulates centriole length in concert with the microcephaly protein RTTN
Source: eLife journal article supplement (doi:10.7554/elife.37846), 2018-08-31
Supplement: supp [file elife-37846-supp-v1.zip › elife_poa_e37846_Figure_3_figure_supplement_5_source_data_1.xlsx]

## Sheet: Cdk5rap2
Cdk5rap2
								Average
Replicate 1	Raw Numbers			Percentage					Neg. Control	c7 #1	c7 #2
	Neg. Control	c7 #1	c7 #2	Neg. Control	c7 #1	c7 #2		2 or more	49.919	33.6489	39.0365
Total Cells	136	121	151					ST. DEV.	4.97302	5.06338	4.22392
0 spots	16	24	22	11.7647	19.8347	14.5695		Total Cells	742	521	521
1 spots	53	57	73	38.9706	47.1074	48.3444
2 spots	61	39	51	44.8529	32.2314	33.7748
> 2 spots	6	1	5	4.41176	0.826446	3.31126
2 or more spots	67	40	56	49.2647	33.0579	37.0861
Replicate 2	Raw Numbers			Percentage
	Neg. Control	c7 #1	c7 #2	Neg. Control	c7 #1	c7 #2
Total Cells	103	100	104
0 spots	15	18	14	14.5631	18	13.4615
1 spots	40	47	54	38.835	47	51.9231
2 spots	46	33	33	44.6602	33	31.7308
> 2 spots	2	2	3	1.94175	2	2.88462
2 or more spots	48	35	36	46.6019	35	34.6154
Replicate 3	Raw Numbers			Percentage				Total Cell Counts
	Neg. Control	c7 #1	c7 #2	Neg. Control	c7 #1	c7 #2			Neg	c7-1	c7-2
Total Cells	308	173	126					less than 2	360	349	317
0 spots	7	31	16	2.27273	17.9191	12.6984		2 or more	382	172	204
1 spots	125	95	54	40.5844	54.9133	42.8571
2 spots	172	44	50	55.8442	25.4335	39.6825
> 2 spots	4	3	6	1.2987	1.7341	4.7619
2 or more spots	176	47	56	57.1429	27.1676	44.4444
Replicate 4	Raw Numbers			Percentage
	Neg. Control	c7 #1	c7 #2	Neg. Control	c7 #1	c7 #2
Total Cells	195	127	140
0 spots	1	8	13	0.512821	6.29921	9.28571
1 spots	103	69	71	52.8205	54.3307	50.7143
2 spots	91	46	46	46.6667	36.2205	32.8571
> 2 spots	0	4	10	0	3.14961	7.14286
2 or more spots	91	50	56	46.6667	39.3701	40

## Sheet: gTUB
Gamma Tubulin
								Average
Replicate 1	Raw Numbers			Percentage					Neg. Control	c7 #1	c7 #2
	Neg. Control	c7 #1	c7 #2	Neg. Control	c7 #1	c7 #2		2 or more	78.7836	56.6912	59.9458
Total Cells	274	124	103					ST. DEV.	5.10879	11.8463	10.8631
0 spots	3	3	7	1.09489	2.41935	6.79612		Total Cells	767	705	581
1 spots	64	34	18	23.3577	27.4194	17.4757
2 spots	196	84	66	71.5328	67.7419	64.0777
> 2 spots	11	3	12	4.0146	2.41935	11.6505
Separated Centrosomes
2 or more spots	207	87	78	75.5474	70.1613	75.7282
Replicate 2	Raw Numbers			Percentage
	Neg. Control	c7 #1	c7 #2	Neg. Control	c7 #1	c7 #2
Total Cells	117	102	139
0 spots	6	9	13	5.12821	8.82353	9.35252
1 spots	15	54	40	12.8205	52.9412	28.777
2 spots	86	35	74	73.5043	34.3137	53.2374
> 2 spots	10	4	12	8.54701	3.92157	8.63309
Separated Centrosomes				0	0	0
2 or more spots	96	39	86	82.0513	38.2353	61.8705
Replicate 3	Raw Numbers			Percentage
	Neg. Control	c7 #1	c7 #2	Neg. Control	c7 #1	c7 #2		Total Cell Counts
Total Cells	126	167	117						Neg	c7-1	c7-2
0 spots	1	14	6	0.793651	8.38323	5.12821		less than 2	169	299	233
1 spots	21	62	40	16.6667	37.1257	34.188		2 or more	598	406	348
2 spots	97	86	64	76.9841	51.497	54.7009
> 2 spots	7	5	7	5.55556	2.99401	5.98291
Separated Centrosomes				0	0	0
2 or more spots	104	91	71	82.5397	54.491	60.6838
Replicate 4	Raw Numbers			Percentage
	Neg. Control	c7 #1	c7 #2	Neg. Control	c7 #1	c7 #2
Total Cells	136	178	115
0 spots	4	11	10	2.94118	6.17978	8.69565
1 spots	35	56	41	25.7353	31.4607	35.6522
2 spots	91	106	55	66.9118	59.5506	47.8261
> 2 spots	6	5	9	4.41176	2.80899	7.82609
Separated Centrosomes				0	0	0
2 or more spots	97	111	64	71.3235	62.3596	55.6522
Replicate 5	Raw Numbers			Percentage
	Neg. Control	c7 #1	c7 #2	Neg. Control	c7 #1	c7 #2
Total Cells	114	134	107
0 spots	3	11	7	2.63158	8.20896	6.54206
1 spots	17	45	51	14.9123	33.5821	47.6636
2 spots	89	75	42	78.0702	55.9701	39.2523
> 2 spots	5	3	7	4.38596	2.23881	6.54206
Separated Centrosomes
2 or more spots	94	78	49	82.4561	58.209	45.7944
