# Supplementary material for: PPP1R35 is a novel centrosomal protein that regulates centriole length in concert with the microcephaly protein RTTN
Source: eLife journal article supplement (doi:10.7554/elife.37846), 2018-08-31
Supplement: supp [file elife-37846-supp-v1.zip › elife_poa_e37846_Figure_3_source_data_1.xlsx]

## Sheet: Fig 3C
Figure 3C Source Data
See the tab "CEP152" (in blue) for CEP152 siRNA source data. Data shown below pertains to the phenotype rescue with GFP-PPP1R35.
GFP-c7orf47 Rescue Average
All are staining for CEP152; 40 pmol siRNA used for all experiments
								GFP-c7orf47 Rescue Average
	Raw Numbers			Percentage				Averages
Replicate 1	Neg. Control	c7-1	c7-2	Neg. Control	20 pmol	40 pmol			Neg. Control	c7 #1	c7 #2
Total Cells	285	491	302					2 or more	68.2812	53.4242	68.4489
0 spots	24	28	33	8.42105	5.70265	10.9272		ST. DEV.	3.56836	4.87951	6.38074
1 spots	70	203	84	24.5614	41.3442	27.8146		Total Cells	1404	2058	1330
2 spots	185	259	179	64.9123	52.7495	59.2715
> 2 spots	6	1	6	2.10526	0.203666	1.98675
Total > 1 spots	191	260	185	67.0175	52.9532	61.2583
	Raw Numbers			Percentage
Replicate 2	Neg. Control	c7-1	c7-2	Neg. Control	20 pmol	40 pmol
Total Cells	100	201	89
0 spots	4	2	8	4	0.995025	8.98876
1 spots	24	110	21	24	54.7264	23.5955
2 spots	71	88	57	71	43.7811	64.0449
> 2 spots	1	1	3	1	0.497512	3.37079
Total > 1 spots	72	89	60	72	44.2786	67.4157
	Raw Numbers			Percentage
Replicate 3	Neg. Control	c7-1	c7-2	Neg. Control	20 pmol	40 pmol
Total Cells	77	248	97
0 spots	2	9	9	2.5974	3.62903	9.27835		Total Cell Counts
1 spots	24	114	25	31.1688	45.9677	25.7732			Neg. Control	c7-1	c7-2
2 spots	44	121	51	57.1429	48.7903	52.5773		Less than 2	445	958	431
> 2 spots	7	4	12	9.09091	1.6129	12.3711		More than 2	959	1100	899
Total > 1 spots	51	125	63	66.2338	50.4032	64.9485
	Raw Numbers			Percentage
Replicate 4	Neg. Control	c7-1	c7-2	Neg. Control	20 pmol	40 pmol
Total Cells	255	278	401
0 spots	16	4	0	6.27451	1.43885	0
1 spots	81	111	109	31.7647	39.9281	27.182
2 spots	152	161	287	59.6078	57.9137	71.5711
> 2 spots	6	2	5	2.35294	0.719424	1.24688
Total > 1 spots	158	163	292	61.9608	58.6331	72.818
	Raw Numbers			Percentage
Replicate 5	Neg. Control	c7-1	c7-2	Neg. Control	20 pmol	40 pmol
Total Cells	400	541	239
0 spots	13	19	25	3.25	3.51201	10.4603
1 spots	99	228	61	24.75	42.1442	25.523
2 spots	271	291	147	67.75	53.7893	61.5063
> 2 spots	17	3	6	4.25	0.554529	2.51046
Total > 1 spots	288	294	153	72	54.3438	64.0167
	Raw Numbers			Percentage
Replicate 6	Neg. Control	c7-1	c7-2	Neg. Control	20 pmol	40 pmol
Total Cells	133	189	66
0 spots	1	5	3	0.75188	2.6455	4.54545
1 spots	39	78	10	29.3233	41.2698	15.1515
2 spots	88	105	44	66.1654	55.5556	66.6667
> 2 spots	5	1	9	3.7594	0.529101	13.6364
Total > 1 spots	93	106	53	69.9248	56.0847	80.303
	Raw Numbers			Percentage
Replicate 7	Neg. Control	c7-1	c7-2	Neg. Control	20 pmol	40 pmol
Total Cells	154	110	136
0 spots	2	8	7	1.2987	7.27273	5.14706
1 spots	46	39	36	29.8701	35.4545	26.4706
2 spots	96	49	87	62.3377	44.5455	63.9706
> 2 spots	10	14	6	6.49351	12.7273	4.41176
Total > 1 spots	106	63	93	68.8312	57.2727	68.3824

## Sheet: Fig 3E
Figure 3E Source Data
See blue coloured tabs

## Sheet: SAS6
SAS6
								Average
Replicate 1	Raw Numbers			Percentage					Neg. Control	c7 #1	c7 #2
	Neg. Control	c7 #1	c7 #2	Neg. Control	c7 #1	c7 #2		2 or more	53.4722	45.4322	46.0723
Total Cells	252	160	137					ST. DEV.	2.91769	1.49895	6.81764
0 spots	89	75	61	35.3175	46.875	44.5255		Total Cells	629	416	395
1 spots	21	12	8	8.33333	7.5	5.83942
2 spots	130	60	63	51.5873	37.5	45.9854
> 2 spots	12	13	5	4.7619	8.125	3.64964
1 or more spots	142	73	68	56.3492	45.625	49.635
Replicate 2	Raw Numbers			Percentage
	Neg. Control	c7 #1	c7 #2	Neg. Control	c7 #1	c7 #2
Total Cells	183	130	123
0 spots	64	51	54	34.9727	39.2308	43.9024
1 spots	21	22	22	11.4754	16.9231	17.8862
2 spots	95	55	46	51.9126	42.3077	37.3984
> 2 spots	3	2	1	1.63934	1.53846	0.813008
1 or more spots	98	57	47	53.5519	43.8462	38.2114
Replicate 3	Raw Numbers			Percentage
	Neg. Control	c7 #1	c7 #2	Neg. Control	c7 #1	c7 #2		Total Cell Counts
Total Cells	194	126	135						Neg	c7-1	c7-2
0 spots	75	47	40	38.6598	37.3016	29.6296		less than 2	291	227	212
1 spots	21	20	27	10.8247	15.873	20		2 or more	338	189	183
2 spots	97	51	60	50	40.4762	44.4444
> 2 spots	1	8	8	0.515464	6.34921	5.92593		Average of Cell Percentages by Category
1 or more spots	98	59	68	50.5155	46.8254	50.3704			Neg		c7-1		c7-2
									Avg	St. Dev.	Avg	St. Dev.	Avg	St. Dev.
								0 spots	36.3166	2.03654	41.1358	5.06304	39.3525	8.42605
								1 spots	10.2112	1.65847	13.432	5.16405	14.5752	7.63888
								2 spots	51.1666	1.02333	40.0946	2.42645	42.6094	4.57819
								> 2 spots	2.30557	2.20022	5.33756	3.40781	3.46286	2.56157

## Sheet: CEP135
CEP135
								Average
Replicate 1	Raw Numbers			Percentage					Neg. Control	c7 #1	c7 #2
	Neg. Control	c7 #1	c7 #2	Neg. Control	c7 #1	c7 #2		2 or more	72.0918	65.3889	62.7105
Total Cells	91	84	71					ST. DEV.	3.90504	10.1302	4.62461
0 spots	15	17	16	16.4835	20.2381	22.5352		Total Cells	945	1180	865
1 spots	16	24	10	17.5824	28.5714	14.0845
2 spots	55	41	36	60.4396	48.8095	50.7042
> 2 spots	5	2	9	5.49451	2.38095	12.6761
2 or more spots	60	43	45	65.9341	51.1905	63.3803
Replicate 2	Raw Numbers			Percentage
	Neg. Control	c7 #1	c7 #2	Neg. Control	c7 #1	c7 #2
Total Cells	127	148	131
0 spots	4	4	4	3.14961	2.7027	3.05344
1 spots	31	33	40	24.4094	22.2973	30.5344
2 spots	83	98	78	65.3543	66.2162	59.542
> 2 spots	9	13	9	7.08661	8.78378	6.87023
2 or more spots	92	111	87	72.4409	75	66.4122
Replicate 3	Raw Numbers			Percentage
	Neg. Control	c7 #1	c7 #2	Neg. Control	c7 #1	c7 #2
Total Cells	162	244	113					Total Cell Counts
0 spots	2	12	10	1.23457	4.91803	8.84956			Neg	c7-1	c7-2
1 spots	42	81	42	25.9259	33.1967	37.1681		less than 2	248	364	313
2 spots	104	140	54	64.1975	57.377	47.7876		2 or more	697	816	552
> 2 spots	14	11	7	8.64198	4.5082	6.19469
2 or more spots	118	151	61	72.8395	61.8852	53.9823		Average of Cell Percentages by Category
									Neg		c7-1		c7-2
Replicate 4	Raw Numbers			Percentage					Avg	St. Dev.	Avg	St. Dev.	Avg	St. Dev.
	Neg. Control	c7 #1	c7 #2	Neg. Control	c7 #1	c7 #2		0 spots	4.78957	5.8736	7.68473	6.88995	8.22734	7.32338
Total Cells	343	422	340					1 spots	23.1187	3.39846	26.9264	5.35826	29.0621	7.80569
0 spots	5	6	12	1.45773	1.4218	3.52941		2 spots	63.43	3.9898	54.5869	12.7988	51.7094	5.44133
1 spots	70	82	101	20.4082	19.4313	29.7059		> 2 spots	8.66178	2.36937	10.802	9.5125	11.0011	4.264
2 spots	240	293	194	69.9708	69.4313	57.0588
> 2 spots	28	41	33	8.16327	9.71564	9.70588
2 or more spots	268	334	227	78.1341	79.1469	66.7647
Replicate 5	Raw Numbers			Percentage
	Neg. Control	c7 #1	c7 #2	Neg. Control	c7 #1	c7 #2
Total Cells	115	175	103
0 spots	2	18	5	1.73913	10.2857	4.85437
1 spots	30	46	33	26.087	26.2857	32.0388
2 spots	71	60	47	61.7391	34.2857	45.6311
> 2 spots	12	51	18	10.4348	29.1429	17.4757
2 or more spots	83	111	65	72.1739	63.4286	63.1068
Replicate 6	Raw Numbers			Percentage
	Neg. Control	c7 #1	c7 #2	Neg. Control	c7 #1	c7 #2
Total Cells	107	107	107
0 spots	5	7	7	4.6729	6.54206	6.54206
1 spots	26	34	33	24.2991	31.7757	30.8411
2 spots	63	55	53	58.8785	51.4019	49.5327
> 2 spots	13	11	14	12.1495	10.2804	13.0841
2 or more spots	76	66	67	71.028	61.6822	62.6168

## Sheet: CETN1
Centrin-1
								Average
Replicate 1	Raw Numbers			Percentage					Neg. Control	c7 #1	c7 #2
	Neg. Control	c7 #1	c7 #2	Neg. Control	c7 #1	c7 #2		2 or more	89.0953	76.6454	78.8906
Total Cells	209	174	188					ST. DEV.	3.11702	7.55114	7.9514
0 spots	4	9	13	1.91388	5.17241	6.91489		Total Cells	2068	2043	1872
1 spots	17	45	32	8.13397	25.8621	17.0213
2 spots	158	112	106	75.5981	64.3678	56.383
> 2 spots	30	8	37	14.3541	4.5977	19.6809
2 or more spots	188	120	143	89.9522	68.9655	76.0638
Replicate 2	Raw Numbers			Percentage
	Neg. Control	c7 #1	c7 #2	Neg. Control	c7 #1	c7 #2
Total Cells	121	100	104
0 spots	2	4	7	1.65289	4	6.73077
1 spots	13	33	20	10.7438	33	19.2308
2 spots	71	55	56	58.6777	55	53.8462
> 2 spots	35	8	21	28.9256	8	20.1923
2 or more spots	106	63	77	87.6033	63	74.0385
Replicate 3	Raw Numbers			Percentage
	Neg. Control	c7 #1	c7 #2	Neg. Control	c7 #1	c7 #2		Total Cell Counts
Total Cells	152	221	126						Neg	c7-1	c7-2
0 spots	4	10	2	2.63158	4.52489	1.5873		less than 2	213	455	391
1 spots	11	32	16	7.23684	14.4796	12.6984		2 or more	1855	1588	1481
2 spots	75	103	55	49.3421	46.6063	43.6508
> 2 spots	62	76	53	40.7895	34.3891	42.0635		Average of Cell Percentages by Category
2 or more spots	137	179	108	90.1316	80.9955	85.7143			Neg		c7-1		c7-2
									Avg	St. Dev.	Avg	St. Dev.	Avg	St. Dev.
								0 spots	3.43351	2.03306	4.778	2.14228	6.60666	3.68216
Replicate 4	Raw Numbers			Percentage				1 spots	7.62024	3.15125	19.2351	9.68647	14.3585	3.77292
	Neg. Control	c7 #1	c7 #2	Neg. Control	c7 #1	c7 #2		2 spots	51.3008	11.982	57.7454	15.3512	47.9871	11.4752
Total Cells	193	112	121					> 2 spots	38.6485	12.3949	20.345	13.124	33.4187	13.688
0 spots	2	6	12	0.956938	3.44828	6.38298
1 spots	9	26	38	4.30622	14.9425	20.2128
2 spots	127	62	39	60.7656	35.6322	20.7447
> 2 spots	55	18	32	26.3158	10.3448	17.0213
2 or more spots	182	80	71	94.3005	71.4286	58.6777
Replicate 5	Raw Numbers			Percentage
	Neg. Control	c7 #1	c7 #2	Neg. Control	c7 #1	c7 #2
Total Cells	373	264	183
0 spots	16	8	6	4.28954	3.0303	3.27869
1 spots	15	25	20	4.02145	9.4697	10.929
2 spots	157	181	94	42.0912	68.5606	51.3661
> 2 spots	185	50	63	49.5979	18.9394	34.4262
2 or more spots	342	231	157	91.689	87.5	85.7923
Replicate 6	Raw Numbers			Percentage
	Neg. Control	c7 #1	c7 #2	Neg. Control	c7 #1	c7 #2
Total Cells	102	102	110
0 spots	2	4	16	1.96078	3.92157	14.5455
1 spots	15	18	20	14.7059	17.6471	18.1818
2 spots	53	66	54	51.9608	64.7059	49.0909
> 2 spots	32	14	20	31.3725	13.7255	18.1818
2 or more spots	85	80	74	83.3333	78.4314	67.2727
Replicate 7	Raw Numbers			Percentage
	Neg. Control	c7 #1	c7 #2	Neg. Control	c7 #1	c7 #2
Total Cells	110	131	101
0 spots	3	2	8	2.72727	1.52672	7.92079
1 spots	6	21	11	5.45455	16.0305	10.8911
2 spots	34	58	38	30.9091	44.2748	37.6238
> 2 spots	67	50	44	60.9091	38.1679	43.5644
2 or more spots	101	108	82	91.8182	82.4427	81.1881
Replicate 8	Raw Numbers			Percentage
	Neg. Control	c7 #1	c7 #2	Neg. Control	c7 #1	c7 #2
Total Cells	116	124	202
0 spots	8	6	15	6.89655	4.83871	7.42574
1 spots	11	8	24	9.48276	6.45161	11.8812
2 spots	49	47	98	42.2414	37.9032	48.5149
> 2 spots	48	63	65	41.3793	50.8065	32.1782
2 or more spots	97	110	163	83.6207	88.7097	80.6931
Replicate 9	Raw Numbers			Percentage
	Neg. Control	c7 #1	c7 #2	Neg. Control	c7 #1	c7 #2
Total Cells	113	144	174
0 spots	9	13	14	7.9646	9.02778	8.04598
1 spots	7	14	20	6.19469	9.72222	11.4943
2 spots	45	74	80	39.823	51.3889	45.977
> 2 spots	52	43	60	46.0177	29.8611	34.4828
2 or more spots	97	117	140	85.8407	81.25	80.4598
Replicate 10	Raw Numbers			Percentage
	Neg. Control	c7 #1	c7 #2	Neg. Control	c7 #1	c7 #2
Total Cells	129	104	130
0 spots	2	5	10	1.55039	4.80769	7.69231
1 spots	13	26	14	10.0775	25	10.7692
2 spots	64	61	55	49.6124	58.6538	42.3077
> 2 spots	50	12	51	38.7597	11.5385	39.2308
2 or more spots	114	73	106	88.3721	70.1923	81.5385
Replicate 11	Raw Numbers			Percentage
	Neg. Control	c7 #1	c7 #2	Neg. Control	c7 #1	c7 #2
Total Cells	110	126	100
0 spots	3	6	6	2.72727	4.7619	6
1 spots	8	35	11	7.27273	27.7778	11
2 spots	73	69	58	66.3636	54.7619	58
> 2 spots	26	16	25	23.6364	12.6984	25
2 or more spots	99	85	83	90	67.4603	83
Replicate 12	Raw Numbers			Percentage
	Neg. Control	c7 #1	c7 #2	Neg. Control	c7 #1	c7 #2
Total Cells	124	117	119
0 spots	5	9	6	4.03226	7.69231	5.04202
1 spots	6	17	21	4.83871	14.5299	17.6471
2 spots	57	74	59	45.9677	63.2479	49.5798
> 2 spots	56	17	33	45.1613	14.5299	27.7311
2 or more spots	113	91	92	91.129	77.7778	77.3109
Replicate 13	Raw Numbers			Percentage
	Neg. Control	c7 #1	c7 #2	Neg. Control	c7 #1	c7 #2
Total Cells	115	218	114
0 spots	4	5	3	3.47826	2.29358	2.63158
1 spots	7	44	11	6.08696	20.1835	9.64912
2 spots	49	133	52	42.6087	61.0092	45.614
> 2 spots	55	36	48	47.8261	16.5138	42.1053
2 or more spots	104	169	100	90.4348	77.5229	87.7193
Replicate 14	Raw Numbers			Percentage
	Neg. Control	c7 #1	c7 #2	Neg. Control	c7 #1	c7 #2
Total Cells	101	106	100
0 spots	5	5	3	4.9505	4.71698	3
1 spots	6	19	12	5.94059	17.9245	12
2 spots	52	68	40	51.4851	64.1509	40
> 2 spots	38	14	45	37.6238	13.2075	45
2 or more spots	90	82	85	89.1089	77.3585	85

## Sheet: CEP295
CEP295
								Average
Replicate 1	Raw Numbers			Percentage					Neg. Control	c7 #1	c7 #2
	Neg. Control	c7 #1	c7 #2	Neg. Control	c7 #1	c7 #2		2 or more	71.6166	48.5889	44.1345
Total Cells	120	109	102					ST. DEV.	5.98003	5.71437	9.04283
0 spots	22	15	28	18.3333	13.7615	27.451		Total Cells	339	319	340
1 spots	20	41	35	16.6667	37.6147	34.3137
2 spots	52	42	30	43.3333	38.5321	29.4118
> 2 spots	26	11	9	21.6667	10.0917	8.82353
2 or more spots	78	53	39	65	48.6239	38.2353
Replicate 2	Raw Numbers			Percentage
	Neg. Control	c7 #1	c7 #2	Neg. Control	c7 #1	c7 #2
Total Cells	107	105	106
0 spots	1	23	31	0.934579	21.9048	29.2453
1 spots	24	37	33	22.4299	35.2381	31.1321
2 spots	69	37	31	64.486	35.2381	29.2453
> 2 spots	13	8	11	12.1495	7.61905	10.3774
2 or more spots	82	45	42	76.6355	42.8571	39.6226
Replicate 3	Raw Numbers			Percentage
	Neg. Control	c7 #1	c7 #2	Neg. Control	c7 #1	c7 #2		Total Cell Counts
Total Cells	112	105	132						Neg	c7-1	c7-2
0 spots	9	34	34	8.03571	32.381	25.7576		less than 2	97	164	187
1 spots	21	14	26	18.75	13.3333	19.697		2 or more	242	155	153
2 spots	55	38	44	49.1071	36.1905	33.3333
> 2 spots	27	19	28	24.1071	18.0952	21.2121		Average of Cell Percentages by Category
2 or more spots	82	57	72	73.2143	54.2857	54.5455			Neg		c7-1		c7-2
									Avg	St. Dev.	Avg	St. Dev.	Avg	St. Dev.
								0 spots	9.10121	8.74818	22.6824	9.33407	27.4846	1.7441
								1 spots	19.2822	2.91825	28.7287	13.3856	28.3809	7.68694
								2 spots	52.3088	10.9337	36.6536	1.69513	30.6635	2.31368
								> 2 spots	19.3078	6.31818	11.9353	5.47602	13.471	6.74887

## Sheet: POC1B
POC1B
								Average
Replicate 1	Raw Numbers			Percentage					Neg. Control	c7 #1	c7 #2
	Neg. Control	c7 #1	c7 #2	Neg. Control	c7 #1	c7 #2		2 or more	69.0569	50.2374	45.2801
Total Cells	112	110	104					ST. DEV.	3.23949	0.941086	10.6006
0 spots	9	14	12	8.03571	12.7273	11.5385		Total Cells	462	514	435
1 spots	21	41	35	18.75	37.2727	33.6538
2 spots	69	52	42	61.6071	47.2727	40.3846
> 2 spots	13	3	15	11.6071	2.72727	14.4231
2 or more spots	82	55	57	73.2143	50	54.8077
Replicate 2	Raw Numbers			Percentage
	Neg. Control	c7 #1	c7 #2	Neg. Control	c7 #1	c7 #2
Total Cells	107	102	107
0 spots	8	15	34	7.47664	14.7059	31.7757
1 spots	29	37	40	27.1028	36.2745	37.3832
2 spots	66	48	33	61.6822	47.0588	30.8411
> 2 spots	4	2	0	3.73832	1.96078	0
2 or more spots	70	50	33	65.4206	49.0196	30.8411
Replicate 3	Raw Numbers			Percentage
	Neg. Control	c7 #1	c7 #2	Neg. Control	c7 #1	c7 #2		Total Cell Counts
Total Cells	108	126	111						Neg	c7-1	c7-2
0 spots	7	10	13	6.48148	7.93651	11.7117		less than 2	143	255	238
1 spots	26	52	49	24.0741	41.2698	44.1441		2 or more	319	259	197
2 spots	71	58	44	65.7407	46.0317	39.6396
> 2 spots	4	6	5	3.7037	4.7619	4.5045		Average of Cell Percentages by Category
2 or more spots	75	64	49	69.4444	50.7937	44.1441			Neg		c7-1		c7-2
									Avg	St. Dev.	Avg	St. Dev.	Avg	St. Dev.
Replicate 4	Raw Numbers			Percentage				0 spots	5.94489	2.84631	13.6151	4.62634	15.1988	11.3911
	Neg. Control	c7 #1	c7 #2	Neg. Control	c7 #1	c7 #2		1 spots	26.6335	7.49209	43.477	10.6307	40.5741	6.15374
Total Cells	135	176	113					2 spots	66.454	7.15343	53.7272	13.8894	38.5337	5.3619
0 spots	2	21	6	1.78571	19.0909	5.76923		> 2 spots	6.10158	3.75057	4.18067	2.3762	7.8569	6.77354
1 spots	41	65	49	36.6071	59.0909	47.1154
2 spots	86	82	45	76.7857	74.5455	43.2692
> 2 spots	6	8	13	5.35714	7.27273	12.5
2 or more spots	92	90	58	68.1481	51.1364	51.3274

## Sheet: CEP152
CEP152
								Average
Replicate 1	Raw Numbers			Percentage					Neg. Control	c7 #1- 40 pmol	c7 #2- 40 pmol
	Neg. Control	c7 #1- 40 pmol	c7 #2- 40 pmol	Neg. Control	c7 #1- 40 pmol	c7 #2- 40 pmol		2 or more	69.718	39.1117	39.2024
Total Cells	775	622	314					ST. DEV.	3.23283	6.87676	9.10461
0 spots	9	42	36	1.16129	9.447	11.465		Total Cells	3348	2365	2137
1 spots	219	408	195	28.2581	54.3779	62.1019
2 spots	530	165	83	68.3871	35.4839	26.4331
> 2 spots	17	7	0	2.19355	0.691244	0
2 or more spots	547	172	83	70.5806	27.6527	26.4331
Replicate 2	Raw Numbers			Percentage
	Neg. Control	c7 #1- 40 pmol	c7 #2- 40 pmol	Neg. Control	c7 #1- 40 pmol	c7 #2- 40 pmol
Total Cells	598	384	744
0 spots	10	29	62	1.67224	7.55208	8.33333
1 spots	184	242	481	30.7692	63.0208	64.6505
2 spots	394	113	195	65.8863	29.4271	26.2097
> 2 spots	10	0	6	1.67224	0	0.806452
2 or more spots	404	113	201	67.5585	29.4271	27.0161
Replicate 3	Raw Numbers			Percentage
	Neg. Control	c7 #1- 40 pmol	c7 #2- 40 pmol	Neg. Control	c7 #1- 40 pmol	c7 #2- 40 pmol		Total Cell Counts
Total Cells	263	260	129						Neg	c7-1	c7-2
0 spots	2	9	6	0.760456	3.46154	4.65116		2 or more	2341	873	739
1 spots	68	136	66	25.8555	52.3077	51.1628		less than 2	1007	1492	1398
2 spots	190	112	51	72.2433	43.0769	39.5349
> 2 spots	3	3	6	1.14068	1.15385	4.65116		Average of Cell Percentages by Category
2 or more spots	193	115	57	73.384	44.2308	44.186			Neg		c7-1		c7-2
									Avg	St. Dev.	Avg	St. Dev.	Avg	St. Dev.
Replicate 4	Raw Numbers			Percentage				0 spots	2.36366	2.452	8.35271	3.77901	9.37414	3.34482
	Neg. Control	c7 #1- 40 pmol	c7 #2- 40 pmol	Neg. Control	c7 #1- 40 pmol	c7 #2- 40 pmol		1 spots	27.9183	5.01299	51.5886	6.70569	51.4234	9.40381
Total Cells	255	309	146					2 spots	66.9926	2.6566	37.9534	5.90959	36.0836	7.62697
0 spots	3	25	17	1.17647	8.09061	11.6438		> 2 spots	2.72543	1.98361	2.10529	1.89846	3.11882	1.92211
1 spots	81	146	52	31.7647	47.2492	35.6164
2 spots	166	133	69	65.098	43.0421	47.2603
> 2 spots	5	5	8	1.96078	1.61812	5.47945
2 or more spots	171	138	77	67.0588	44.6602	52.7397
Replicate 5	Raw Numbers			Percentage
	Neg. Control	c7 #1- 40 pmol	c7 #2- 40 pmol	Neg. Control	c7 #1- 40 pmol	c7 #2- 40 pmol
Total Cells	286	162	208
0 spots	7	20	27	2.44755	12.3457	12.9808
1 spots	82	73	112	28.6713	45.0617	53.8462
2 spots	182	64	61	63.6364	39.5062	29.3269
> 2 spots	15	5	8	5.24476	3.08642	3.84615
2 or more spots	197	69	69	68.8811	42.5926	33.1731
Replicate 6	Raw Numbers			Percentage
	Neg. Control	c7 #1- 40 pmol	c7 #2- 40 pmol	Neg. Control	c7 #1- 40 pmol	c7 #2- 40 pmol
Total Cells	562	126	180
0 spots	48	14	21	8.54093	11.1111	11.6667
1 spots	100	61	92	17.7936	48.4127	51.1111
2 spots	382	47	60	67.9715	37.3016	33.3333
> 2 spots	32	4	7	5.69395	3.1746	3.88889
2 or more spots	414	51	67	73.6655	40.4762	37.2222
Replicate 7	Raw Numbers			Percentage
	Neg. Control	c7 #1- 40 pmol	c7 #2- 40 pmol	Neg. Control	c7 #1- 40 pmol	c7 #2- 40 pmol
Total Cells	377	265	187
0 spots	5	10	13	1.32626	3.77358	6.95187
1 spots	119	133	92	31.565	50.1887	49.1979
2 spots	250	116	78	66.313	43.7736	41.7112
> 2 spots	3	6	4	0.795756	2.26415	2.13904
2 or more spots	253	122	82	67.1088	46.0377	43.8503
Replicate 8	Raw Numbers			Percentage
	Neg. Control	c7 #1- 40 pmol	c7 #2- 40 pmol	Neg. Control	c7 #1- 40 pmol	c7 #2- 40 pmol
Total Cells	122	96	90
0 spots	4	5	4	3.27869	5.20833	4.44444
1 spots	28	58	50	22.9508	60.4167	55.5556
2 spots	84	27	34	68.8525	28.125	37.7778
> 2 spots	6	6	2	4.91803	6.25	2.22222
2 or more spots	90	33	36	73.7705	34.375	40
Replicate 9	Raw Numbers			Percentage
	Neg. Control	c7 #1- 40 pmol	c7 #2- 40 pmol	Neg. Control	c7 #1- 40 pmol	c7 #2- 40 pmol
Total Cells	110	141	139
0 spots	1	20	17	0.909091	14.1844	12.2302
1 spots	37	61	55	33.6364	43.2624	39.5683
2 spots	71	59	60	64.5455	41.844	43.1655
> 2 spots	1	1	7	0.909091	0.70922	5.03597
2 or more spots	72	60	67	65.4545	42.5532	48.2014

## Sheet: Fig. 3F
CEP152
Replicate 1								Replicate 2								Averages and St. Dev. Of Percentages
	Raw Numbers			Percentage					Raw Numbers			Percentage												For Plot, cells with >1 spots
CEP152 96 hrs	Neg. Control	c7-1	c7-2	Neg. Control	20 pmol	40 pmol		CEP152 96 hrs	Neg. Control	c7-1	c7-2	Neg. Control	20 pmol	40 pmol		96 hrs	Neg. Control		c7-1		c7-2				Neg. Control		c7-1		c7-2
Total Cells	144	114	72					Total Cells	108	118	105					Total cells	252		232		177				Avg.	St. Dev.	Avg.	St. Dev.	Avg.	St. Dev.
0 spots	9	13	20	6.25	11.4035	27.7778		0 spots	15	14	25	13.8889	11.8644	23.8095		0 spots	10.0694	5.40151	11.634	0.325904	25.7937	2.80598		72 hrs	69.7	3.23	39.1	6.88	39.2	9.1
1 spots	71	64	35	49.3056	56.1404	48.6111		1 spots	23	50	61	21.2963	42.3729	58.0952		1 spots	35.3009	19.8055	49.2566	9.73507	53.3532	6.70629		96 hrs	54.6296	14.404	39.1094	9.40917	20.8532	3.90031
2 spots	61	36	12	42.3611	31.5789	16.6667		2 spots	66	50	11	61.1111	42.3729	10.4762		2 spots	51.7361	13.2583	36.9759	7.63246	13.5714	4.37733		120 hrs	69.1468	4.34927	37.8334	19.7136	24.4913	4.56998
> 2 spots	3	1	5	2.08333	0.877193	6.94444		> 2 spots	4	4	8	3.7037	3.38983	7.61905		> 2 spots	2.89352	1.14577	2.13351	1.7767	7.28175	0.477016		144 hrs	60.9386	5.01669	18.2154	7.91123	16.0445	3.65285
																> 1 spots	54.6296	14.404	39.1094	9.40917	20.8532	3.90031
	Raw Numbers			Percentage					Raw Numbers			Percentage
CEP152 120 hrs	Neg. Control	c7-1	c7-2	Neg. Control	20 pmol	40 pmol		CEP152 120 hrs	Neg. Control	c7-1	c7-2	Neg. Control	20 pmol	40 pmol		120 hrs	Neg. Control		c7-1		c7-2
Total Cells	112	141	127					Total Cells	108	113	101					Total cells	220		254		228
0 spots	1	20	47	0.892857	14.1844	37.0079		0 spots	6	34	31	5.55556	30.0885	30.6931		0 spots	3.22421	3.29703	22.1364	11.2459	33.8505	4.46524
1 spots	37	48	53	33.0357	34.0426	41.7323		1 spots	24	52	42	22.2222	46.0177	41.5842		1 spots	27.629	7.64629	40.0301	8.46771	41.6582	0.10474
2 spots	67	70	13	59.8214	49.6454	10.2362		2 spots	73	22	24	67.5926	19.469	23.7624		2 spots	63.707	5.49504	34.5572	21.3379	16.9993	9.56444
> 2 spots	7	3	14	6.25	2.12766	11.0236		> 2 spots	5	5	4	4.62963	4.42478	3.9604		> 2 spots	5.43981	1.14577	3.27622	1.62431	7.49201	4.99446
																> 1 spots	69.1468	4.34927	37.8334	19.7136	24.4913	4.56998
	Raw Numbers			Percentage					Raw Numbers			Percentage
CEP152 144 hrs	Neg. Control	c7-1	c7-2	Neg. Control	20 pmol	40 pmol		CEP152 144 hrs	Neg. Control	c7-1	c7-2	Neg. Control	20 pmol	40 pmol		144 hrs	Neg. Control		c7-1		c7-2
Total Cells	107	105	104					Total Cells	115	103	102					Total cells	222		208		206
0 spots	5	37	34	4.6729	35.2381	32.6923		0 spots	9	25	41	7.82609	24.2718	40.1961		0 spots	6.24949	2.22964	29.755	7.75431	36.4442	5.30597
1 spots	33	43	56	30.8411	40.9524	53.8462		1 spots	40	65	42	34.7826	63.1068	41.1765		1 spots	32.8119	2.78705	52.0296	15.6655	47.5113	8.95882
2 spots	64	23	13	59.8131	21.9048	12.5		2 spots	63	12	17	54.7826	11.6505	16.6667		2 spots	57.2978	3.55708	16.7776	7.25087	14.5833	2.94628
> 2 spots	5	2	1	4.6729	1.90476	0.961538		> 2 spots	3	1	2	2.6087	0.970874	1.96078		> 2 spots	3.6408	1.45961	1.43782	0.660359	1.46116	0.706574
																> 1 spots	60.9386	5.01669	18.2154	7.91123	16.0445	3.65285
24 to 48 hrs
Replicate 1								Replicate 2								Replicate 3								Averages and St. Dev. Of Percentages								For Plot, cells with >1 spots
	Raw Numbers			Percentage					Raw Numbers			Percentage					Raw Numbers			Percentage													Neg. Control		c7-1		c7-2
CEP152 24 hrs	Neg. Control	c7-1	c7-2	Neg. Control	20 pmol	40 pmol		CEP152 24 hrs	Neg. Control	c7-1	c7-2	Neg. Control	20 pmol	40 pmol		CEP152 24 hrs	Neg. Control	c7-1	c7-2	Neg. Control	20 pmol	40 pmol		24 hrs	Neg. Control		c7-1		c7-2				Avg.	St. Dev.	Avg.	St. Dev.	Avg.	St. Dev.
Total Cells	102	101	105					Total Cells	116	100	152					Total Cells	104	109	107					Total cells	322		310		364			24 hrs	63.6587	8.0341	58.7303	6.26239	62.5365	6.81347
0 spots	3	13	2	2.94118	12.8713	1.90476		0 spots	0	4	1	0	4	0.657895		0 spots	3	5	5	2.88462	4.58716	4.6729		0 spots	1.94193	1.682	7.15281	4.96104	2.41185	2.05497		48 hrs	65.7245	3.19353	48.9322	7.47005	46.0957	14.8731
1 spots	43	35	44	42.1569	34.6535	41.9048		1 spots	34	31	45	29.3103	31	29.6053		1 spots	33	40	36	31.7308	36.6972	33.6449		1 spots	34.3993	6.82636	34.1169	2.88627	35.0516	6.26926
2 spots	55	52	59	53.9216	51.4851	56.1905		2 spots	81	62	103	69.8276	62	67.7632		2 spots	66	58	64	63.4615	53.211	59.8131		2 spots	62.4036	8.00561	55.5654	5.63896	61.2556	5.91966
> 2 spots	1	1	0	0.980392	0.990099	0		> 2 spots	1	3	3	0.862069	3	1.97368		> 2 spots	2	6	2	1.92308	5.50459	1.86916		> 2 spots	1.25518	0.581434	3.1649	2.26176	1.28095	1.11056
																								> 1 spots	63.6587	8.0341	58.7303	6.26239	62.5365	6.81347
	Raw Numbers			Percentage					Raw Numbers			Percentage					Raw Numbers			Percentage
CEP152 48 hrs	Neg. Control	c7-1	c7-2	Neg. Control	20 pmol	40 pmol		CEP152 48 hrs	Neg. Control	c7-1	c7-2	Neg. Control	20 pmol	40 pmol		CEP152 48 hrs	Neg. Control	c7-1	c7-2	Neg. Control	20 pmol	40 pmol		48 hrs	Neg. Control		c7-1		c7-2
Total Cells	108	110	108					Total Cells	108	105	99					Total Cells	114	105	122					Total cells	330		320		329
0 spots	4	8	13	3.7037	7.27273	12.037		0 spots	1	6	7	0.925926	5.71429	7.07071		0 spots	1	8	2	0.877193	7.61905	1.63934		0 spots	1.83561	1.618	6.86869	1.01463	6.9157	5.20058
1 spots	31	39	43	28.7037	35.4545	39.8148		1 spots	40	50	62	37.037	47.619	62.6263		1 spots	36	52	47	31.5789	49.5238	38.5246		1 spots	32.4399	4.23285	44.1991	7.63269	46.9886	13.558
2 spots	70	62	49	64.8148	56.3636	45.3704		2 spots	67	46	30	62.037	43.8095	30.303		2 spots	77	42	67	67.5439	40	54.918		2 spots	64.7986	2.75345	46.7244	8.56239	43.5305	12.4102
> 2 spots	3	1	3	2.77778	0.909091	2.77778		> 2 spots	0	3	0	0	2.85714	0		> 2 spots	0	3	6	0	2.85714	4.91803		> 2 spots	0.925926	1.60375	2.20779	1.12471	2.56527	2.46589
																								> 1 spots	65.7245	3.19353	48.9322	7.47005	46.0957	14.8731
