# Supplementary material for: PPP1R35 is a novel centrosomal protein that regulates centriole length in concert with the microcephaly protein RTTN
Source: eLife journal article supplement (doi:10.7554/elife.37846), 2018-08-31
Supplement: supp [file elife-37846-supp-v1.zip › elife_poa_e37846_Figure_4_figure_supplement_1_source_data_1.xlsx]

## Sheet: Figure 4- figure supplement 1
Figure S7 Source Data
GFP-c7orf47 U2OS + RTTN siRNA Compiled Datasets
Replicate 1	Raw Numbers		Percentage			> 1 spots	Neg. Control	RTTN siRNA
CETN1	Neg. Control	RTTN	Neg. Control	RTTN		GFP-c7	86.3327	84.0264
Total Cells	134	149				St. Dev.	5.25767	2.8027
0 spots	3	2	2.23881	1.34228		Total Cells	523	469
1 spots	17	26	12.6866	17.4497
2 spots	101	108	75.3731	72.4832
> 2 spots	13	13	9.70149	8.72483		Total Cell Counts
> 1 spot	114	121	85.0746	81.2081			Neg	RTTN
						less than 2	79	74
Replicate 2	Raw Numbers		Percentage			2 or more	444	395
CETN1	Neg. Control	RTTN	Neg. Control	RTTN
Total Cells	114	182
0 spots	1	1	0.877193	0.549451
1 spots	8	23	7.01754	12.6374
2 spots	76	125	66.6667	68.6813
> 2 spots	29	33	25.4386	18.1319
> 1 spot	105	158	92.1053	86.8132
Replicate 3	Raw Numbers		Percentage
CETN1	Neg. Control	RTTN	Neg. Control	RTTN
Total Cells	275	138
0 spots	2	5	0.727273	3.62319
1 spots	48	17	17.4545	12.3188
2 spots	165	82	60	59.4203
> 2 spots	60	34	21.8182	24.6377
> 1 spot	225	116	81.8182	84.058
