# Supplementary material for: PPP1R35 is a novel centrosomal protein that regulates centriole length in concert with the microcephaly protein RTTN
Source: eLife journal article supplement (doi:10.7554/elife.37846), 2018-08-31
Supplement: supp [file elife-37846-supp-v1.zip › elife_poa_e37846_Figure_4_source_data_1.xlsx]

## Sheet: Fig 4D
Figure 4D Source Data
All analyzed centrosomes were in interphase and on the same z-plane; all distances are in nanometers.
GFP-c7orf47 to POC1B				GFP-c7orf47 to CEP135				GFP-c7orf47 to RTTN (N-ter mCherry tag)				GFP-c7orf47 to RTTN (Antibody)				GFP-c7orf47 to CPAP
Average:	140.56	58.4495		Average:	91.65	40.1933		Average:	79.1	45.5272		Average:	112.045	51.9189		Average:	61.1034	34.0497
Centrosome #	Distance (nm)			Centrosome #	Distance (nm)			Centrosome #	Distance (nm)			Centrosome #	Distance (nm)			Centrosome #	Distance (um)
1	158			1	71			1	13			1	191			1	165
2	205			2	67			2	13			2	91			2	66
3	300			3	32			3	22			3	45			3	15
4	57			4	107			4	49			4	62			4	51
5	37			5	147			5	84			5	131			5	72
6	100			6	57			6	19			6	116			6	50
7	165			7	113			7	114			7	150			7	22
8	194			8	180			8	62			8	59			8	28
9	200			9	54			9	66			9	155			9	86
10	159			10	70			10	78			10	88			10	74
11	82			11	93			11	132			11	139			11	43
12	125			12	145			12	78			12	19			12	125
13	136			13	90			13	41			13	103			13	50
14	202			14	106			14	78			14	204			14	51
15	97			15	134			15	143			15	84			15	64
16	196			16	86			16	141			16	164			16	90
17	89			17	114			17	139			17	132			17	62
18	152			18	30			18	57			18	142			18	52
19	176			19	93			19	112			19	169			19	117
20	140			20	44			20	141			20	126			20	34
21	94											21	21			21	37
22	89											22	74			22	63
23	157															23	31
24	123															24	71
25	81															25	102
																26	35
																27	63
																28	26
																29	27

## Sheet: Fig 4E
Figure 4E Source Data
mCherry-RTTN
								Average
Replicate 1	Raw Numbers			Percentage					Neg. Control	c7 #1	c7 #2
	Neg. Control	c7 #1	c7 #2	Neg. Control	c7 #1	c7 #2		2 or more	70.7452	62.7101	55.8125
Total Cells	151	230	165					ST. DEV.	9.74439	13.33	10.2726
0 spots	3	23	26	1.98675	10	15.7576		Total Cells	1436	1572	1260
1 spots	26	64	60	17.2185	27.8261	36.3636
2 spots	102	122	72	67.5497	53.0435	43.6364
> 2 spots	20	21	7	13.245	9.13043	4.24242
2 or more spots	122	143	79	80.7947	62.1739	47.8788
Replicate 2	Raw Numbers			Percentage
	Neg. Control	c7 #1	c7 #2	Neg. Control	c7 #1	c7 #2
Total Cells	182	77	111
0 spots	2	2	14	1.0989	2.5974	12.6126
1 spots	26	17	55	14.2857	22.0779	49.5495
2 spots	107	44	20	58.7912	57.1429	18.018
> 2 spots	47	14	22	25.8242	18.1818	19.8198
2 or more spots	154	58	42	84.6154	75.3247	37.8378
Replicate 3	Raw Numbers			Percentage				Total Cell Counts
	Neg. Control	c7 #1	c7 #2	Neg. Control	c7 #1	c7 #2			Neg	c7-1	c7-2
Total Cells	56	86	59					less than 2	409	606	573
0 spots	2	0	0	3.57143	0	0		2 or more	1027	966	687
1 spots	12	14	18	21.4286	16.2791	30.5085
2 spots	36	44	35	64.2857	51.1628	59.322
> 2 spots	6	28	6	10.7143	32.5581	10.1695
2 or more spots	42	72	41	75	83.7209	69.4915
Replicate 4	Raw Numbers			Percentage
	Neg. Control	c7 #1	c7 #2	Neg. Control	c7 #1	c7 #2
Total Cells	177	210	92
0 spots	2	2	6	1.12994	0.952381	6.52174
1 spots	42	41	23	23.7288	19.5238	25
2 spots	99	117	41	55.9322	55.7143	44.5652
> 2 spots	34	50	22	19.209	23.8095	23.913
2 or more spots	133	167	63	75.1412	79.5238	68.4783
Replicate 5	Raw Numbers			Percentage
	Neg. Control	c7 #1	c7 #2	Neg. Control	c7 #1	c7 #2
Total Cells	186	198	140
0 spots	2	4	1	1.07527	2.0202	0.714286
1 spots	40	67	51	21.5054	33.8384	36.4286
2 spots	133	125	81	71.5054	63.1313	57.8571
> 2 spots	11	2	7	5.91398	1.0101	5
2 or more spots	144	127	88	77.4194	64.1414	62.8571
Replicate 6	Raw Numbers			Percentage
	Neg. Control	c7 #1	c7 #2	Neg. Control	c7 #1	c7 #2
Total Cells	102	223	189
0 spots	4	13	6	3.92157	5.8296	3.1746
1 spots	27	96	74	26.4706	43.0493	39.1534
2 spots	65	106	103	63.7255	47.5336	54.4974
> 2 spots	6	8	6	5.88235	3.58744	3.1746
2 or more spots	71	114	109	69.6078	51.1211	57.672
Replicate 7	Raw Numbers			Percentage
	Neg. Control	c7 #1	c7 #2	Neg. Control	c7 #1	c7 #2
Total Cells	146	149	104
0 spots	5	15	2	3.31126	6.52174	1.21212
1 spots	46	70	37	30.4636	30.4348	22.4242
2 spots	92	63	57	60.9272	27.3913	34.5455
> 2 spots	3	1	8	1.98675	0.434783	4.84848
2 or more spots	95	64	65	65.0685	42.953	62.5
Replicate 8	Raw Numbers			Percentage
	Neg. Control	c7 #1	c7 #2	Neg. Control	c7 #1	c7 #2
Total Cells	107	103	107
0 spots	1	4	11	0.934579	3.8835	10.2804
1 spots	37	35	37	34.5794	33.9806	34.5794
2 spots	63	56	55	58.8785	54.3689	51.4019
> 2 spots	6	8	4	5.60748	7.76699	3.73832
2 or more spots	69	64	59	64.486	62.1359	55.1402
Replicate 9	Raw Numbers			Percentage
	Neg. Control	c7 #1	c7 #2	Neg. Control	c7 #1	c7 #2
Total Cells	100	129	183
0 spots	17	6	8	17	4.65116	4.37158
1 spots	31	55	87	31	42.6357	47.541
2 spots	44	65	84	44	50.3876	45.9016
> 2 spots	8	3	4	8	2.32558	2.18579
2 or more spots	52	68	88	52	52.7132	48.0874
Replicate 10	Raw Numbers			Percentage
	Neg. Control	c7 #1	c7 #2	Neg. Control	c7 #1	c7 #2
Total Cells	229	167	110
0 spots	15	15	11	6.55022	8.98204	10
1 spots	69	63	46	30.131	37.7246	41.8182
2 spots	141	68	52	61.5721	40.7186	47.2727
> 2 spots	4	21	1	1.74672	12.5749	0.909091
2 or more spots	145	89	53	63.3188	53.2934	48.1818

## Sheet: Fig 4F
Figure 4F Source Data
GFP-PPP1R35 U2OS + RTTN siRNA
Replicate 1	Raw Numbers		Percentage			> 1 spots	Neg. Control	RTTN siRNA
	Neg. Control	RTTN	Neg. Control	RTTN		GFP-c7	60.3664	33.9782
Total Cells	144	96				St. Dev.	7.8924	10.5059
0 spots	1	3	0.694444	3.125		Total Cells	522	405
1 spots	43	50	29.8611	52.0833
2 spots	93	41	64.5833	42.7083
> 2 spots	7	2	4.86111	2.08333		Total Cell Counts
> 1 spot	100	43	69.4444	44.7917			Neg	RTTN
						less than 2	212	271
Replicate 2	Raw Numbers		Percentage			2 or more	310	134
	Neg. Control	RTTN	Neg. Control	RTTN
Total Cells	115	183
0 spots	17	19	14.7826	10.3825
1 spots	33	103	28.6957	56.2842
2 spots	64	61	55.6522	33.3333
> 2 spots	1	0	0.869565	0
> 1 spot	65	61	56.5217	33.3333
Replicate 3	Raw Numbers		Percentage
	Neg. Control	RTTN	Neg. Control	RTTN
Total Cells	263	126
0 spots	22	24	8.36502	19.0476
1 spots	96	72	36.5019	57.1429
2 spots	143	28	54.3726	22.2222
> 2 spots	2	2	0.760456	1.5873
> 1 spot	145	30	55.1331	23.8095
