# Supplementary material for: PPP1R35 is a novel centrosomal protein that regulates centriole length in concert with the microcephaly protein RTTN
Source: eLife journal article supplement (doi:10.7554/elife.37846), 2018-08-31

Chordata

Mollusca

Arthropoda

Mammalia

Reptilia

Actinopterygii

Insecta

← Outgroup

Sds22 (*Drosophila Melanogaster*)

*Schistosoma mansoni*

*Loxodonta africana*

*Pteropus alecto*

*Bos taurus*

*Canis lupus familiar*

*Manis javanica*

*Equus asinus*

*Erinaceus europaeus*

*Tupaia chinensis*

*Propithecus coquereli*

*Rhinopithecus roxellana*

*Macaca mulatta*

**Homo sapien**

*Callithrix jacchus*

*Galeopterus variegatus*

*Mus musculus*

*Dasypus novemcinctus*

*Trichechus manatus*

*Orycteropus afer afer*

*Elephantulus edwardi*

*Chrysochloris asiatica*

*Monodelphis domestica*

*Phascolarctos cinereus*

*Sarcophilus harrisii*

*Sturnus vulgaris*

*Xenopus tropicalis*

*Alligator mississippiensis*

*Chrysemys picta bellii*

*Gekko japonicus*

*Latimeria chalumnae*

*Rhincodon typus*

*Callorhinchus milii*

*Scleropages formosus*

*Clupea harengus*

*Pygocentrus nattereri*

*Danio rerio*

*Salmo salar*

*Esox lucius*

*Boleophthalmus pectinirostris*

*Paralichthys olivaceus*

*Anoplopoma fimbria*

*Monopterus albus*

*Fundulus heteroclitus*

*Maylandia zebra*

*Oryzias latipes*

*Takifugu rubripes*

*Lepisosteus oculatus*

*Limulus polyphemus*

*Biomphalaria glabrata*

*Aplysia californica*

*Lottia gigantea*

*Crassostrea gigas*

*Octopus bimaculoides*

*Capitella teleta*

*Lingula anatina*

*Acanthaster planci*

*Strongylocentrotus purpuratus*

*Saccoglossus kowalevskii*

*Branchiostoma floridae*

*Orbicella faveolata*

*Nematostella vectensis*

*Priapulus caudatus*

*Ciona intestinalis*

*Papilio xuthus*

*Danaus plexippus*

*Zootermopsis nevadensis*

*Cimex lectularius*

*Folsomia candida*

*Pediculus humanus*

*Apis dorsata*

*Dendroctonus ponderosae*

*Drosophila melanogaster*

*Trichoplax adhaerens*

*Oikopleura dioica*

*Daphnia pulex*

*Hymenolepis microstoma*

*Dictyocaulus viviparus*

*Opisthorchis viverrini*

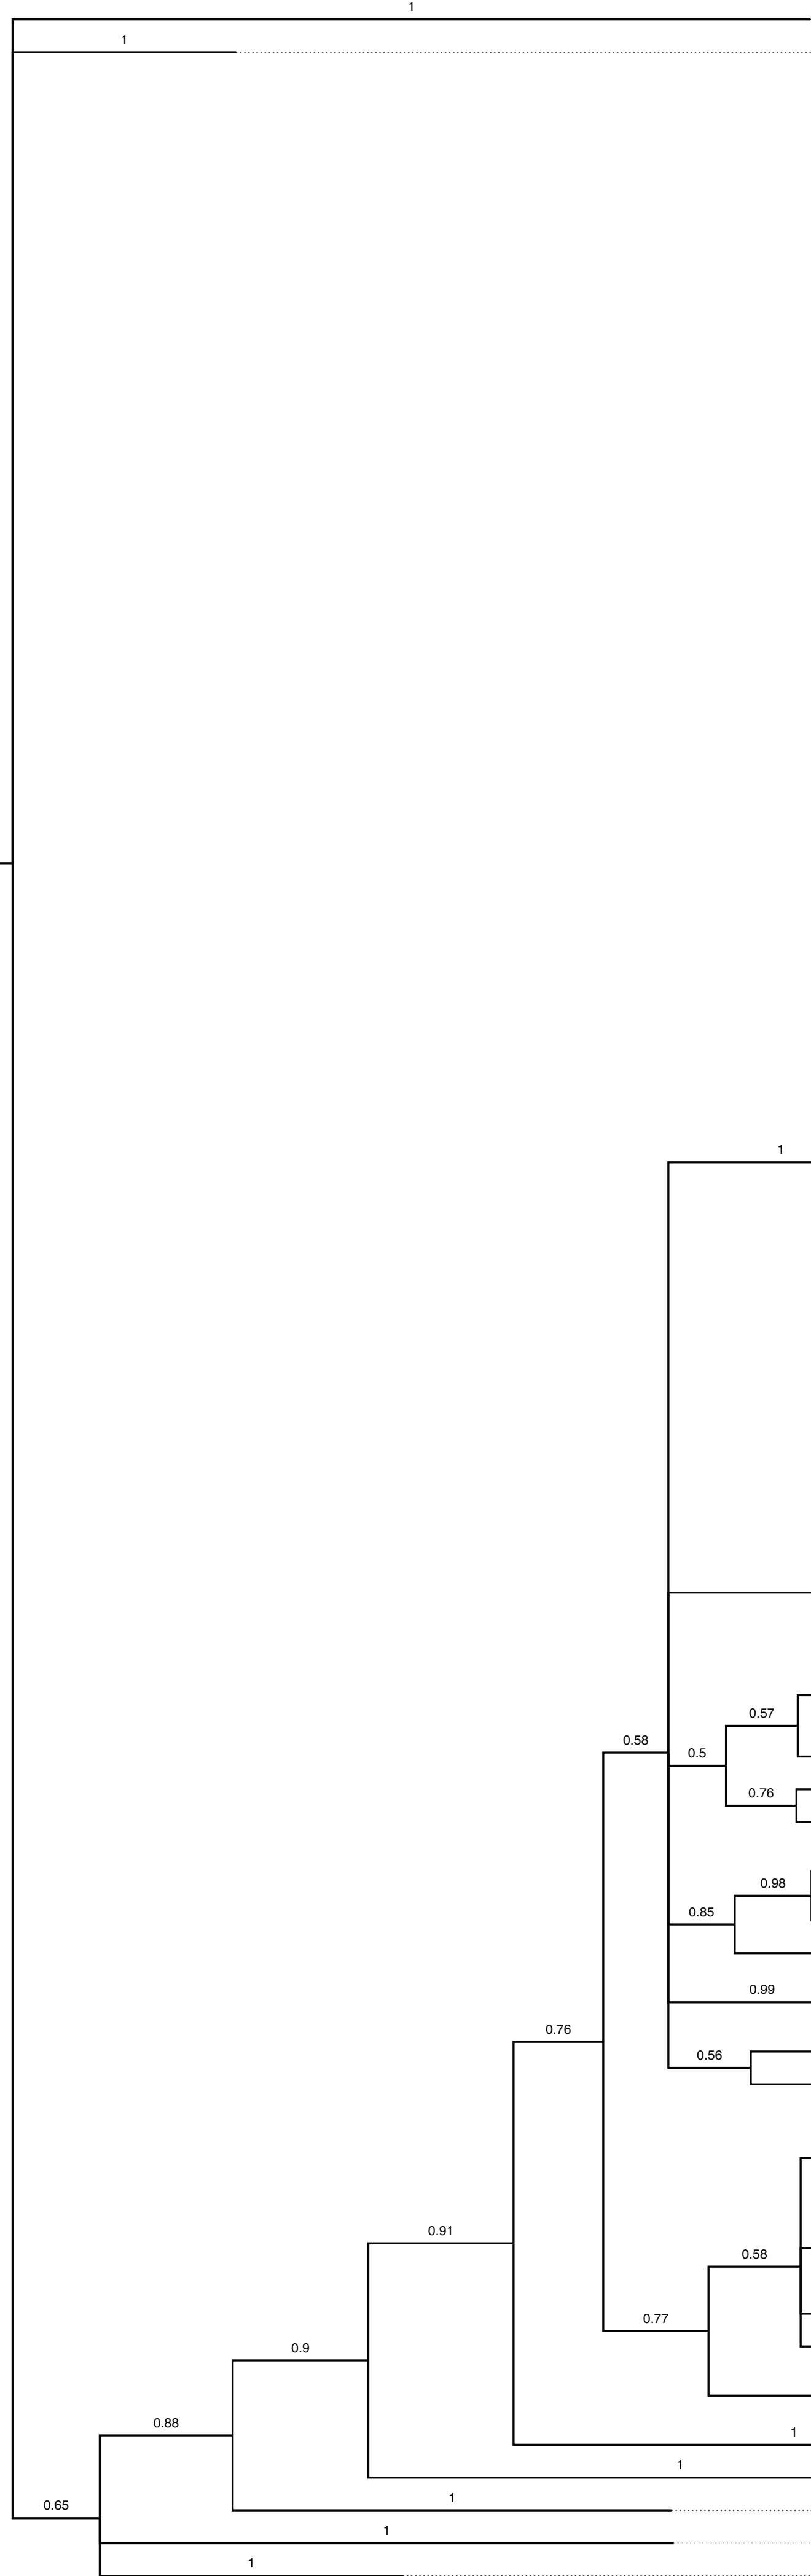

Supplement: supp [file elife-37846-supp-v1.zip › elife_poa_e37846_Figure_5_figure_supplement_1.pdf]
