# Supplementary material for: PPP1R35 is a novel centrosomal protein that regulates centriole length in concert with the microcephaly protein RTTN
Source: eLife journal article supplement (doi:10.7554/elife.37846), 2018-08-31
Supplement: supp [file elife-37846-supp-v1.zip › elife_poa_e37846_Figure_5_figure_supplement_2.pdf]

|    |    |    |    |    |    |    |    |    |     |     |
|----|----|----|----|----|----|----|----|----|-----|-----|
| 10 | 20 | 30 | 40 | 50 | 60 | 70 | 80 | 90 | 100 | 110 |
|----|----|----|----|----|----|----|----|----|-----|-----|

### Canonical RVxF PP1-Binding Site

\_\_\_\_\_

### Annotated PPP1R35 Domain

$$\vdots \quad \star \quad \vdots \quad \vdots$$
6
