# Supplementary material for: PPP1R35 is a novel centrosomal protein that regulates centriole length in concert with the microcephaly protein RTTN
Source: eLife journal article supplement (doi:10.7554/elife.37846), 2018-08-31
Supplement: supp [file elife-37846-supp-v1.zip › elife_poa_e37846_Figure_5_figure_supplement_4_source_data_1.xlsx]

## Sheet: HEK293
HEK293 Averaged Datasets
	Raw Numbers			Percentage				> 2 spots	Neg. Control	c7 #1	c7 #2				Neg	c7-1	c7-2
Replicate 1	Neg. Control	c7 #1	c7 #2	Neg. Control	c7 #1	c7 #2		Replicate 1	59.4527	51.3089	55.1948			less than 1	292	276	229
Total Cells	402	191	154					Replicate 2	58.8235	54.7619	45.3704			2 or more	488	314	221
0 spots	48	13	22	11.9403	6.80628	14.2857		Replicate 3	69.1589	49.1379	53.719
1 spots	115	80	47	28.607	41.8848	30.5195		Replicate 4	68.0473	57.3248	32.8358
2 spots	192	86	69	47.7612	45.0262	44.8052		Average	63.8706	53.1334	46.78
> 2 spots	47	12	16	11.6915	6.28272	10.3896		St. Dev	5.48943	3.62918	10.2532
> 1 spot				59.4527	51.3089	55.1948		Total Cells	780	590	450
	Raw Numbers			Percentage
Replicate 2	Neg. Control	c7 #1	c7 #2	Neg. Control	c7 #1	c7 #2
Total Cells	102	126	108
0 spots	16	23	32	15.6863	18.254	29.6296
1 spots	26	34	27	25.4902	26.9841	25
2 spots	45	58	35	44.1176	46.0317	32.4074
> 2 spots	15	11	14	14.7059	8.73016	12.963
> 1 spot				58.8235	54.7619	45.3704
	Raw Numbers			Percentage
Replicate 3	Neg. Control	c7 #1	c7 #2	Neg. Control	c7 #1	c7 #2
Total Cells	107	116	121
0 spots	13	5	18	12.1495	4.31034	14.876
1 spots	20	54	38	18.6916	46.5517	31.405
2 spots	57	41	57	53.271	35.3448	47.1074
> 2 spots	17	16	8	15.8879	13.7931	6.61157
> 1 spot				69.1589	49.1379	53.719
	Raw Numbers			Percentage
Replicate 4	Neg. Control	c7 #1	c7 #2	Neg. Control	c7 #1	c7 #2
Total Cells	169	157	67
0 spots	8	12	10	4.73373	7.64331	14.9254
1 spots	46	55	35	27.2189	35.0318	52.2388
2 spots	88	84	15	52.071	53.5032	22.3881
> 2 spots	27	6	7	15.9763	3.82166	10.4478
> 1 spot				68.0473	57.3248	32.8358

## Sheet: WT c7
HEK293 Averaged Datasets- WT N-ter BirA-c7
	Raw Numbers			Percentage				> 2 spots	Neg. Control	c7 #1	c7 #2				Neg	c7-1	c7-2
Replicate 1	Neg. Control	c7 #1	c7 #2	Neg. Control	c7 #1	c7 #2		Replicate 1	63.4146	47.7679	53.125			less than 1	135	273	222
Total Cells	123	224	192					Replicate 2	59.0909	50.4167	54.6961			2 or more	227	293	272
0 spots	10	22	35	8.13008	9.82143	18.2292		Replicate 3	66.3551	63.7255	58.6777
1 spots	35	95	55	28.4553	42.4107	28.6458		Average	62.9536	53.97	55.4996
2 spots	63	82	83	51.2195	36.6071	43.2292		St. Dev	3.654	8.55168	2.86221
> 2 spots	15	25	19	12.1951	11.1607	9.89583		Total Cells	362	566	494
> 1 spot				63.4146	47.7679	53.125
	Raw Numbers			Percentage
Replicate 2	Neg. Control	c7 #1	c7 #2	Neg. Control	c7 #1	c7 #2
Total Cells	132	240	181
0 spots	35	44	32	26.5152	18.3333	17.6796
1 spots	19	75	50	14.3939	31.25	27.6243
2 spots	61	97	81	46.2121	40.4167	44.7514
> 2 spots	17	24	18	12.8788	10	9.94475
> 1 spot				59.0909	50.4167	54.6961
	Raw Numbers			Percentage
Replicate 3	Neg. Control	c7 #1	c7 #2	Neg. Control	c7 #1	c7 #2
Total Cells	107	102	121
0 spots	10	8	18	9.34579	7.84314	14.876
1 spots	26	29	32	24.2991	28.4314	26.4463
2 spots	49	54	60	45.7944	52.9412	49.5868
> 2 spots	22	11	11	20.5607	10.7843	9.09091
> 1 spot				66.3551	63.7255	58.6777

## Sheet: Triple Ala
HEK293 Averaged Datasets- Triple Ala
	Raw Numbers			Percentage				> 2 spots	Neg. Control	c7 #1	c7 #2				Neg	c7-1	c7-2
Replicate 1	Neg. Control	c7 #1	c7 #2	Neg. Control	c7 #1	c7 #2		Replicate 1	66.3636	51.1475	65.2174			less than 1	108	257	140
Total Cells	110	305	184					Replicate 2	59.4286	47.3171	58.9189			2 or more	177	253	229
0 spots	1	22	17	0.909091	7.21311	9.23913
1 spots	36	127	47	32.7273	41.6393	25.5435		Average	62.8961	49.2323	62.0682
2 spots	63	138	99	57.2727	45.2459	53.8043		St. Dev	4.90383	2.70855	4.45369
> 2 spots	10	18	21	9.09091	5.90164	11.413		Total Cells	285	510	369
> 1 spot				66.3636	51.1475	65.2174
	Raw Numbers			Percentage
Replicate 2	Neg. Control	c7 #1	c7 #2	Neg. Control	c7 #1	c7 #2
Total Cells	175	205	185
0 spots	18	8	3	10.2857	3.90244	1.62162
1 spots	53	100	73	30.2857	48.7805	39.4595
2 spots	99	95	99	56.5714	46.3415	53.5135
> 2 spots	5	2	10	2.85714	0.97561	5.40541
> 1 spot				59.4286	47.3171	58.9189

## Sheet: Triple Asp
HEK293 Averaged Datasets- Triple Asp
	Raw Numbers			Percentage				> 2 spots	Neg. Control	c7 #1	c7 #2				Neg	c7-1	c7-2
Replicate 1	Neg. Control	c7 #1	c7 #2	Neg. Control	c7 #1	c7 #2		Replicate 1	62.6374	62.5749	58.1967			less than 1	148	230	205
Total Cells	182	334	366					Replicate 2	59.799	52.9148	60.6061			2 or more	233	327	293
0 spots	5	27	46	2.74725	8.08383	12.5683
1 spots	63	98	107	34.6154	29.3413	29.235		Average	61.2182	57.7448	59.4014
2 spots	108	181	203	59.3407	54.1916	55.4645		St. Dev	2.00703	6.83069	1.70366
> 2 spots	6	28	10	3.2967	8.38323	2.73224		Total Cells	381	557	498
> 1 spot				62.6374	62.5749	58.1967
	Raw Numbers			Percentage
Replicate 2	Neg. Control	c7 #1	c7 #2	Neg. Control	c7 #1	c7 #2
Total Cells	199	223	132
0 spots	10	10	16	5.02513	4.4843	12.1212
1 spots	70	95	36	35.1759	42.6009	27.2727
2 spots	111	111	71	55.7789	49.7758	53.7879
> 2 spots	8	7	9	4.0201	3.13901	6.81818
> 1 spot				59.799	52.9148	60.6061
