# Supplementary material for: PPP1R35 is a novel centrosomal protein that regulates centriole length in concert with the microcephaly protein RTTN
Source: eLife journal article supplement (doi:10.7554/elife.37846), 2018-08-31
Supplement: supp [file elife-37846-supp-v1.zip › elife_poa_e37846_Figure_5_source_data_1.xlsx]

## Sheet: GFP-PPP1R35 Rescue
GFP-PPP1R35 Rescue Average
All are staining for CEP152; 40 pmol siRNA used for all experiments
								GFP-c7orf47 Rescue Average
	Raw Numbers			Percentage				Averages
Replicate 1	Neg. Control	c7-1	c7-2	Neg. Control	20 pmol	40 pmol			Neg. Control	c7 #1	c7 #2
Total Cells	285	491	302					2 or more	68.2812	53.4242	68.4489
0 spots	24	28	33	8.42105	5.70265	10.9272		ST. DEV.	3.56836	4.87951	6.38074
1 spots	70	203	84	24.5614	41.3442	27.8146		Total Cells	1404	2058	1330
2 spots	185	259	179	64.9123	52.7495	59.2715
> 2 spots	6	1	6	2.10526	0.203666	1.98675
Total > 1 spots	191	260	185	67.0175	52.9532	61.2583
	Raw Numbers			Percentage
Replicate 2	Neg. Control	c7-1	c7-2	Neg. Control	20 pmol	40 pmol
Total Cells	100	201	89
0 spots	4	2	8	4	0.995025	8.98876
1 spots	24	110	21	24	54.7264	23.5955
2 spots	71	88	57	71	43.7811	64.0449
> 2 spots	1	1	3	1	0.497512	3.37079
Total > 1 spots	72	89	60	72	44.2786	67.4157
	Raw Numbers			Percentage
Replicate 3	Neg. Control	c7-1	c7-2	Neg. Control	20 pmol	40 pmol
Total Cells	77	248	97
0 spots	2	9	9	2.5974	3.62903	9.27835		Total Cell Counts
1 spots	24	114	25	31.1688	45.9677	25.7732			Neg. Control	c7-1	c7-2
2 spots	44	121	51	57.1429	48.7903	52.5773		Less than 2	445	958	431
> 2 spots	7	4	12	9.09091	1.6129	12.3711		More than 2	959	1100	899
Total > 1 spots	51	125	63	66.2338	50.4032	64.9485
	Raw Numbers			Percentage
Replicate 4	Neg. Control	c7-1	c7-2	Neg. Control	20 pmol	40 pmol
Total Cells	255	278	401
0 spots	16	4	0	6.27451	1.43885	0
1 spots	81	111	109	31.7647	39.9281	27.182
2 spots	152	161	287	59.6078	57.9137	71.5711
> 2 spots	6	2	5	2.35294	0.719424	1.24688
Total > 1 spots	158	163	292	61.9608	58.6331	72.818
	Raw Numbers			Percentage
Replicate 5	Neg. Control	c7-1	c7-2	Neg. Control	20 pmol	40 pmol
Total Cells	400	541	239
0 spots	13	19	25	3.25	3.51201	10.4603
1 spots	99	228	61	24.75	42.1442	25.523
2 spots	271	291	147	67.75	53.7893	61.5063
> 2 spots	17	3	6	4.25	0.554529	2.51046
Total > 1 spots	288	294	153	72	54.3438	64.0167
	Raw Numbers			Percentage
Replicate 6	Neg. Control	c7-1	c7-2	Neg. Control	20 pmol	40 pmol
Total Cells	133	189	66
0 spots	1	5	3	0.75188	2.6455	4.54545
1 spots	39	78	10	29.3233	41.2698	15.1515
2 spots	88	105	44	66.1654	55.5556	66.6667
> 2 spots	5	1	9	3.7594	0.529101	13.6364
Total > 1 spots	93	106	53	69.9248	56.0847	80.303
	Raw Numbers			Percentage
Replicate 7	Neg. Control	c7-1	c7-2	Neg. Control	20 pmol	40 pmol
Total Cells	154	110	136
0 spots	2	8	7	1.2987	7.27273	5.14706
1 spots	46	39	36	29.8701	35.4545	26.4706
2 spots	96	49	87	62.3377	44.5455	63.9706
> 2 spots	10	14	6	6.49351	12.7273	4.41176
Total > 1 spots	106	63	93	68.8312	57.2727	68.3824

## Sheet: CEP152
CEP152
								Average
Replicate 1	Raw Numbers			Percentage					Neg. Control	c7 #1- 40 pmol	c7 #2- 40 pmol
	Neg. Control	c7 #1- 40 pmol	c7 #2- 40 pmol	Neg. Control	c7 #1- 40 pmol	c7 #2- 40 pmol		2 or more	69.718	39.1117	39.2024
Total Cells	775	622	314					ST. DEV.	3.23283	6.87676	9.10461
0 spots	9	42	36	1.16129	9.447	11.465		Total Cells	3348	2365	2137
1 spots	219	408	195	28.2581	54.3779	62.1019
2 spots	530	165	83	68.3871	35.4839	26.4331
> 2 spots	17	7	0	2.19355	0.691244	0
2 or more spots	547	172	83	70.5806	27.6527	26.4331
Replicate 2	Raw Numbers			Percentage
	Neg. Control	c7 #1- 40 pmol	c7 #2- 40 pmol	Neg. Control	c7 #1- 40 pmol	c7 #2- 40 pmol
Total Cells	598	384	744
0 spots	10	29	62	1.67224	7.55208	8.33333
1 spots	184	242	481	30.7692	63.0208	64.6505
2 spots	394	113	195	65.8863	29.4271	26.2097
> 2 spots	10	0	6	1.67224	0	0.806452
2 or more spots	404	113	201	67.5585	29.4271	27.0161
Replicate 3	Raw Numbers			Percentage
	Neg. Control	c7 #1- 40 pmol	c7 #2- 40 pmol	Neg. Control	c7 #1- 40 pmol	c7 #2- 40 pmol		Total Cell Counts
Total Cells	263	260	129						Neg	c7-1	c7-2
0 spots	2	9	6	0.760456	3.46154	4.65116		2 or more	2341	873	739
1 spots	68	136	66	25.8555	52.3077	51.1628		less than 2	1007	1492	1398
2 spots	190	112	51	72.2433	43.0769	39.5349
> 2 spots	3	3	6	1.14068	1.15385	4.65116		Average of Cell Percentages by Category
2 or more spots	193	115	57	73.384	44.2308	44.186			Neg		c7-1		c7-2
									Avg	St. Dev.	Avg	St. Dev.	Avg	St. Dev.
Replicate 4	Raw Numbers			Percentage				0 spots	2.36366	2.452	8.35271	3.77901	9.37414	3.34482
	Neg. Control	c7 #1- 40 pmol	c7 #2- 40 pmol	Neg. Control	c7 #1- 40 pmol	c7 #2- 40 pmol		1 spots	27.9183	5.01299	51.5886	6.70569	51.4234	9.40381
Total Cells	255	309	146					2 spots	66.9926	2.6566	37.9534	5.90959	36.0836	7.62697
0 spots	3	25	17	1.17647	8.09061	11.6438		> 2 spots	2.72543	1.98361	2.10529	1.89846	3.11882	1.92211
1 spots	81	146	52	31.7647	47.2492	35.6164
2 spots	166	133	69	65.098	43.0421	47.2603
> 2 spots	5	5	8	1.96078	1.61812	5.47945
2 or more spots	171	138	77	67.0588	44.6602	52.7397
Replicate 5	Raw Numbers			Percentage
	Neg. Control	c7 #1- 40 pmol	c7 #2- 40 pmol	Neg. Control	c7 #1- 40 pmol	c7 #2- 40 pmol
Total Cells	286	162	208
0 spots	7	20	27	2.44755	12.3457	12.9808
1 spots	82	73	112	28.6713	45.0617	53.8462
2 spots	182	64	61	63.6364	39.5062	29.3269
> 2 spots	15	5	8	5.24476	3.08642	3.84615
2 or more spots	197	69	69	68.8811	42.5926	33.1731
Replicate 6	Raw Numbers			Percentage
	Neg. Control	c7 #1- 40 pmol	c7 #2- 40 pmol	Neg. Control	c7 #1- 40 pmol	c7 #2- 40 pmol
Total Cells	562	126	180
0 spots	48	14	21	8.54093	11.1111	11.6667
1 spots	100	61	92	17.7936	48.4127	51.1111
2 spots	382	47	60	67.9715	37.3016	33.3333
> 2 spots	32	4	7	5.69395	3.1746	3.88889
2 or more spots	414	51	67	73.6655	40.4762	37.2222
Replicate 7	Raw Numbers			Percentage
	Neg. Control	c7 #1- 40 pmol	c7 #2- 40 pmol	Neg. Control	c7 #1- 40 pmol	c7 #2- 40 pmol
Total Cells	377	265	187
0 spots	5	10	13	1.32626	3.77358	6.95187
1 spots	119	133	92	31.565	50.1887	49.1979
2 spots	250	116	78	66.313	43.7736	41.7112
> 2 spots	3	6	4	0.795756	2.26415	2.13904
2 or more spots	253	122	82	67.1088	46.0377	43.8503
Replicate 8	Raw Numbers			Percentage
	Neg. Control	c7 #1- 40 pmol	c7 #2- 40 pmol	Neg. Control	c7 #1- 40 pmol	c7 #2- 40 pmol
Total Cells	122	96	90
0 spots	4	5	4	3.27869	5.20833	4.44444
1 spots	28	58	50	22.9508	60.4167	55.5556
2 spots	84	27	34	68.8525	28.125	37.7778
> 2 spots	6	6	2	4.91803	6.25	2.22222
2 or more spots	90	33	36	73.7705	34.375	40
Replicate 9	Raw Numbers			Percentage
	Neg. Control	c7 #1- 40 pmol	c7 #2- 40 pmol	Neg. Control	c7 #1- 40 pmol	c7 #2- 40 pmol
Total Cells	110	141	139
0 spots	1	20	17	0.909091	14.1844	12.2302
1 spots	37	61	55	33.6364	43.2624	39.5683
2 spots	71	59	60	64.5455	41.844	43.1655
> 2 spots	1	1	7	0.909091	0.70922	5.03597
2 or more spots	72	60	67	65.4545	42.5532	48.2014

## Sheet: Fig 5C and 5E
Figure 5C and 5E Source Data
Source data for the Negative control and PPP1R35 3' UTR-siRNA treated cells can be found in the blue "CEP152" tab. WT GFP-PPP1R35 rescue source data can be found in the tab "GFP-PPP1R35 Rescue".
	V79A, F81A GFP-PPP1R35				Triple Asp GFP-PPP1R35				S45A GFP-PPP1R35				S47A GFP-PPP1R35
	Raw Data	Percentage			Raw Data	Percentage			Raw Data	Percentage			Raw Data	Percentage
Replicate 1	c7 #2	c7 #2		Replicate 1	c7 #2	c7 #2		Replicate 1	c7 #2	c7 #2		Replicate 1	c7 #2	c7 #2
Total Cells	203			Total Cells	204			Total Cells	198			Total Cells	150
0 spots	18	8.867		0 spots	28	13.7255		0 spots	9	4.54545		0 spots	4	2.66667
1 spots	68	33.4975		1 spots	50	24.5098		1 spots	79	39.899		1 spots	50	33.3333
2 spots	111	54.6798		2 spots	123	60.2941		2 spots	105	53.0303		2 spots	88	58.6667
> 2 spots	6	2.95567		> 2 spots	3	1.47059		> 2 spots	5	2.52525		> 2 spots	8	5.33333
	Raw Data	Percentage			Raw Data	Percentage			Raw Data	Percentage			Raw Data	Percentage
Replicate 2	c7 #2	c7 #2		Replicate 2	c7 #2	c7 #2		Replicate 1	c7 #2	c7 #2		Replicate 2	c7 #2	c7 #2
Total Cells	252			Total Cells	125			Total Cells	90			Total Cells	125
0 spots	17	6.74603		0 spots	13	10.4		0 spots	6	6.66667		0 spots	2	1.08108
1 spots	85	33.7302		1 spots	28	22.4		1 spots	28	31.1111		1 spots	49	26.4865
2 spots	144	57.1429		2 spots	74	59.2		2 spots	52	57.7778		2 spots	71	38.3784
> 2 spots	6	2.38095		> 2 spots	10	8		> 2 spots	4	4.44444		> 2 spots	3	1.62162
	Raw Data	Percentage			Raw Data	Percentage			Raw Data	Percentage			Raw Data	Percentage
Replicate 3	c7 #2	c7 #2		Replicate 3	c7 #2	c7 #2		Replicate 1	c7 #2	c7 #2		Replicate 3	c7 #2	c7 #2
Total Cells	194			Total Cells	201			Total Cells	266			Total Cells	148
0 spots	3	1.54639		0 spots	6	2.98507		0 spots	13	4.88722		0 spots	17	11.4865
1 spots	59	30.4124		1 spots	66	32.8358		1 spots	99	37.218		1 spots	48	32.4324
2 spots	122	62.8866		2 spots	122	60.6965		2 spots	147	55.2632		2 spots	78	52.7027
> 2 spots	10	5.15464		> 2 spots	7	3.48259		> 2 spots	7	2.63158		> 2 spots	5	3.37838
				> 1 spots Averaged Data:	Average	64.3813		> 1 spots Averaged Data:	Average	58.8889
	Raw Data	Percentage			St. Dev.	2.72328			St. Dev.	4.71405			Raw Data	Percentage
Replicate 4	c7 #2	c7 #2			Total Cells	530			Total Cells	554		Replicate 4	c7 #2	c7 #2
Total Cells	82											Total Cells	182
0 spots	1	1.21951		Total cell counts:	less than 2	191		Total cell counts:	less than 2	234		0 spots	8	4.3956
1 spots	28	34.1463			2 or more	339			2 or more	320		1 spots	83	45.6044
2 spots	49	59.7561										2 spots	89	48.9011
> 2 spots	4	4.87805										> 2 spots	2	1.0989
	Raw Data	Percentage											Raw Data	Percentage
Replicate 5	c7 #2	c7 #2										Replicate 5	c7 #2	c7 #2
Total Cells	212											Total Cells	132
0 spots	7	3.30189										0 spots	8	6.06061
1 spots	74	34.9057										1 spots	45	34.0909
2 spots	129	60.8491										2 spots	73	55.303
> 2 spots	2	0.943396										> 2 spots	6	4.54545
												> 1 spots Averaged Data:	Average	57.8259
	Raw Data	Percentage											St. Dev.	5.20547
Replicate 6	c7 #2	c7 #2											Total Cells	737
Total Cells	118
0 spots	6	5.08475										Total cell counts:	less than 2	314
1 spots	35	29.661											2 or more	423
2 spots	74	62.7119
> 2 spots	3	2.54237
> 1 spots Averaged Data:	Average	62.8136
	St. Dev.	3.88015
	Total Cells	1061
Total cell counts:	less than 2	401
	2 or more	660
