# Supplementary material for: PPP1R35 is a novel centrosomal protein that regulates centriole length in concert with the microcephaly protein RTTN
Source: eLife journal article supplement (doi:10.7554/elife.37846), 2018-08-31
Supplement: supp [file elife-37846-supp-v1.zip › elife_poa_e37846_Figure_6_figure_supplement_1_source_data_1.xlsx]

## Sheet: Acet Tub
Acetylated Tubulin
								Average
Replicate 1	Raw Numbers			Percentage					Neg. Control	c7 #1	c7 #2
	Neg. Control	c7 #1	c7 #2	Neg. Control	c7 #1	c7 #2		2 or more	73.0259	66.595	68.4521
Total Cells	120	152	100					ST. DEV.	10.7844	7.41554	4.98308
0 spots	3	5	6	2.5	3.28947	6		Total Cells	343	380	301
1 spots	15	33	20	12.5	21.7105	20
2 spots	85	105	65	70.8333	69.0789	65
> 2 spots	17	9	9	14.1667	5.92105	9
2 or more spots	102	114	74	85	75	74
Replicate 2	Raw Numbers			Percentage
	Neg. Control	c7 #1	c7 #2	Neg. Control	c7 #1	c7 #2
Total Cells	103	123	100
0 spots	5	8	8	4.85437	6.50407	8
1 spots	32	40	25	31.068	32.5203	25
2 spots	63	75	64	61.165	60.9756	64
> 2 spots	3	0	3	2.91262	0	3
2 or more spots	66	75	67	64.0777	60.9756	67
Replicate 3	Raw Numbers			Percentage
	Neg. Control	c7 #1	c7 #2	Neg. Control	c7 #1	c7 #2			Total Cell Counts
Total Cells	120	105	101							Neg	c7-1	c7-2
0 spots	11	4	12	9.16667	3.80952	11.8812			2 or more	91	124	95
1 spots	25	34	24	20.8333	32.381	23.7624			less than 2	252	256	206
2 spots	83	60	49	69.1667	57.1429	48.5149
> 2 spots	1	7	16	0.833333	6.66667	15.8416
2 or more spots	84	67	65	70	63.8095	64.3564
