# Supplementary material for: PPP1R35 is a novel centrosomal protein that regulates centriole length in concert with the microcephaly protein RTTN
Source: eLife journal article supplement (doi:10.7554/elife.37846), 2018-08-31
Supplement: supp [file elife-37846-supp-v1.zip › elife_poa_e37846_Figure_6_source_data_1.xlsx]

## Sheet: Fig 6B
Figure 6B Source Data
Distance from CP110 to acetylated tubulin; only those on the same plane were measured
	Negative Control siRNA	PPP1R35 Exon siRNA	PPP1R35 3' UTR siRNA	GFP-PPP1R35 U2OS
Centrosome #	Length (nm)	Length (nm)	Length (nm)	Length (nm)
1	386	288	305	417
2	234	326	287	450
3	310	177	339	391
4	388	228	270	251
5	392	331	141	396
6	246	227	350	361
7	331	350	165	469
8	390	307	211	277
9	431	175	99	519
10	426	250	125	574
11	304	256	261	293
12	423	300	303	312
13	330	400	200	319
14	398	190	276	451
15		178	173	360
16		225	326	349
17			350	299
Average	356.357	263	245.941	381.647
St. Dev.	64.6037	68.6722	82.651	89.4308
	p value (T-Test)	0.000659228	0.000250095	0.369281

## Sheet: Fig 6C
Figure 6C Source Data
See green coloured tabs

## Sheet: CPAP
CPAP
								Average
Replicate 1	Raw Numbers			Percentage					Neg. Control	c7 #1	c7 #2
	Neg. Control	c7 #1	c7 #2	Neg. Control	c7 #1	c7 #2		2 or more	71.147	37.9117	32.5943
Total Cells	164	115	43					ST. DEV.	2.50069	12.0779	7.64379
0 spots	32	41	22	19.5122	35.6522	51.1628		Total Cells	1395	1152	865
1 spots	23	42	10	14.0244	36.5217	23.2558
2 spots	103	31	10	62.8049	26.9565	23.2558
> 2 spots	6	1	1	3.65854	0.869565	2.32558
2 or more spots	109	32	11	66.4634	27.8261	25.5814
Replicate 2	Raw Numbers			Percentage
	Neg. Control	c7 #1	c7 #2	Neg. Control	c7 #1	c7 #2
Total Cells	96	48	60
0 spots	11	14	22	11.4583	29.1667	36.6667
1 spots	15	12	17	15.625	25	28.3333
2 spots	70	21	15	72.9167	43.75	25
> 2 spots	0	1	6	0	2.08333	10
2 or more spots	70	22	21	72.9167	45.8333	35
Replicate 3	Raw Numbers			Percentage
	Neg. Control	c7 #1	c7 #2	Neg. Control	c7 #1	c7 #2		Total Cell Counts
Total Cells	91	117	44						Neg	c7-1	c7-2
0 spots	9	31	17	9.89011	26.4957	38.6364		less than 2	405	684	586
1 spots	16	63	15	17.5824	53.8462	34.0909		2 or more	990	468	279
2 spots	63	21	12	69.2308	17.9487	27.2727
> 2 spots	3	2	0	3.2967	1.7094	0
2 or more spots	66	23	12	72.5275	19.6581	27.2727
Replicate 4	Raw Numbers			Percentage
	Neg. Control	c7 #1	c7 #2	Neg. Control	c7 #1	c7 #2
Total Cells	227	249	177
0 spots	9	23	41	3.96476	9.23695	23.1638
1 spots	62	93	76	27.3128	37.3494	42.9379
2 spots	153	120	58	67.4009	48.1928	32.7684
> 2 spots	3	13	2	1.32159	5.22088	1.12994
2 or more spots	156	133	60	68.7225	53.4137	33.8983
Replicate 5	Raw Numbers			Percentage
	Neg. Control	c7 #1	c7 #2	Neg. Control	c7 #1	c7 #2
Total Cells	217	133	199
0 spots	23	44	89	3.96476	9.23695	23.1638
1 spots	38	52	64	27.3128	37.3494	42.9379
2 spots	146	23	34	67.4009	48.1928	32.7684
> 2 spots	10	14	12	1.32159	5.22088	1.12994
2 or more spots	156	37	46	71.8894	27.8195	23.1156
Replicate 6	Raw Numbers			Percentage
	Neg. Control	c7 #1	c7 #2	Neg. Control	c7 #1	c7 #2
Total Cells	281	119	99
0 spots	14	27	35	4.98221	22.6891	35.3535
1 spots	62	39	23	22.0641	32.7731	23.2323
2 spots	183	46	28	65.1246	38.6555	28.2828
> 2 spots	22	7	13	7.82918	5.88235	13.1313
2 or more spots	205	53	41	72.9537	44.5378	41.4141
Replicate 7	Raw Numbers			Percentage
	Neg. Control	c7 #1	c7 #2	Neg. Control	c7 #1	c7 #2
Total Cells	125	103	138
0 spots	15	30	56	12	29.1262	40.5797
1 spots	18	37	41	14.4	35.9223	29.7101
2 spots	75	28	32	60	27.1845	23.1884
> 2 spots	17	8	9	13.6	7.76699	6.52174
2 or more spots	92	36	41	73.6	34.9515	29.7101
Replicate 8	Raw Numbers			Percentage
	Neg. Control	c7 #1	c7 #2	Neg. Control	c7 #1	c7 #2
Total Cells	194	268	105
0 spots	5	41	18	2.57732	15.2985	17.1429
1 spots	53	95	40	27.3196	35.4478	38.0952
2 spots	126	114	32	64.9485	42.5373	30.4762
> 2 spots	10	18	15	5.15464	6.71642	14.2857
2 or more spots	136	132	47	70.1031	49.2537	44.7619

## Sheet: SPICE
SPICE
								Average
Replicate 1	Raw Numbers			Percentage					Neg. Control	c7 #1	c7 #2
	Neg. Control	c7 #1	c7 #2	Neg. Control	c7 #1	c7 #2		2 or more	73.1469	47.7816	54.5642
Total Cells	128	102	110					ST. DEV.	8.11976	10.5266	10.0325
0 spots	10	12	22	7.8125	11.7647	20		Total Cells	590	665	538
1 spots	23	35	39	17.9688	34.3137	35.4545
2 spots	72	52	41	56.25	50.9804	37.2727
> 2 spots	23	3	8	17.9688	2.94118	7.27273
2 or more spots	95	55	49	74.2188	53.9216	44.5455
Replicate 2	Raw Numbers			Percentage
	Neg. Control	c7 #1	c7 #2	Neg. Control	c7 #1	c7 #2
Total Cells	127	130	101
0 spots	22	32	19	17.3228	24.6154	18.8119
1 spots	30	54	37	23.622	41.5385	36.6337
2 spots	66	40	39	51.9685	30.7692	38.6139
> 2 spots	9	4	6	7.08661	3.07692	5.94059
2 or more spots	75	44	45	59.0551	33.8462	44.5545
Replicate 3	Raw Numbers			Percentage
	Neg. Control	c7 #1	c7 #2	Neg. Control	c7 #1	c7 #2
Total Cells	123	120	113					Total Cell Counts
0 spots	6	10	10	4.87805	8.33333	8.84956			Neg	c7-1	c7-2
1 spots	19	36	35	15.4472	30	30.9735		less than 2	160	352	243
2 spots	71	67	53	57.7236	55.8333	46.9027		2 or more	430	313	295
> 2 spots	27	7	15	21.9512	5.83333	13.2743
2 or more spots	98	74	68	79.6748	61.6667	60.177
Replicate 4	Raw Numbers			Percentage
	Neg. Control	c7 #1	c7 #2	Neg. Control	c7 #1	c7 #2
Total Cells	112	208	114
0 spots	3	29	11	2.67857	13.9423	9.64912
1 spots	23	86	26	20.5357	41.3462	22.807
2 spots	62	92	57	55.3571	44.2308	50
> 2 spots	24	1	20	21.4286	0.480769	17.5439
2 or more spots	86	93	77	76.7857	44.7115	67.5439
Replicate 5	Raw Numbers			Percentage
	Neg. Control	c7 #1	c7 #2	Neg. Control	c7 #1	c7 #2
Total Cells	100	105	100
0 spots	10	18	17	10	17.1429	17
1 spots	14	40	27	14	38.0952	27
2 spots	60	45	42	60	42.8571	42
> 2 spots	16	2	14	16	1.90476	14
2 or more spots	76	47	56	76	44.7619	56

## Sheet: POC5
POC5
								Average
Replicate 1	Raw Numbers			Percentage					Neg. Control	c7 #1	c7 #2
	Neg. Control	c7 #1	c7 #2	Neg. Control	c7 #1	c7 #2		2 or more	73.7388	57.5843	59.0592
Total Cells	105	74	43					ST. DEV.	4.50171	2.71575	3.05393
0 spots	6	5	0	5.71429	6.75676	0		Total Cells	363	357	281
1 spots	27	26	17	25.7143	35.1351	39.5349
2 spots	63	28	19	60	37.8378	44.186
> 2 spots	9	15	7	8.57143	20.2703	16.2791
2 or more spots	72	43	26	68.5714	58.1081	60.4651
Replicate 2	Raw Numbers			Percentage
	Neg. Control	c7 #1	c7 #2	Neg. Control	c7 #1	c7 #2
Total Cells	120	100	117
0 spots	9	1	7	7.5	1	5.98291
1 spots	20	39	45	16.6667	39	38.4615
2 spots	60	46	46	50	46	39.3162
> 2 spots	31	14	19	25.8333	14	16.2393
2 or more spots	91	60	65	75.8333	60	55.5556
Replicate 3	Raw Numbers			Percentage				Total Cell Counts
	Neg. Control	c7 #1	c7 #2	Neg. Control	c7 #1	c7 #2			Neg	c7-1	c7-2
Total Cells	138	183	121					less than 2	94	154	116
0 spots	2	14	8	1.44928	7.65027	6.61157		2 or more	269	203	165
1 spots	30	69	39	21.7391	37.7049	32.2314
2 spots	79	86	62	57.2464	46.9945	51.2397
> 2 spots	27	14	12	19.5652	7.65027	9.91736
2 or more spots	106	100	74	76.8116	54.6448	61.157

## Sheet: CP110
CP110
								Average
Replicate 1	Raw Numbers			Percentage					Neg. Control	c7 #1	c7 #2
	Neg. Control	c7 #1	c7 #2	Neg. Control	c7 #1	c7 #2		2 or more	80.6218	80.4266	75.0273
Total Cells	105	114	101					ST. DEV.	4.67612	5.20755	2.28371
0 spots	5	10	13	4.7619	8.77193	12.8713		Total Cells	323	318	321
1 spots	13	10	12	12.381	8.77193	11.8812
2 spots	53	56	43	50.4762	49.1228	42.5743
> 2 spots	34	38	33	32.381	33.3333	32.6733
2 or more spots	87	94	76	82.8571	82.4561	75.2475
Replicate 2	Raw Numbers			Percentage
	Neg. Control	c7 #1	c7 #2	Neg. Control	c7 #1	c7 #2
Total Cells	101	102	114
0 spots	8	20	8	7.92079	19.6078	7.01754
1 spots	17	6	18	16.8317	5.88235	15.7895
2 spots	36	35	54	35.6436	34.3137	47.3684
> 2 spots	40	41	34	39.604	40.1961	29.8246
2 or more spots	76	76	88	75.2475	74.5098	77.193
Replicate 3	Raw Numbers			Percentage
	Neg. Control	c7 #1	c7 #2	Neg. Control	c7 #1	c7 #2		Total Cell Counts
Total Cells	117	102	106						Neg	c7-1	c7-2
0 spots	5	2	7	4.2735	1.96078	6.60377		less than 2	62	62	80
1 spots	14	14	22	11.9658	13.7255	20.7547		2 or more	261	256	241
2 spots	39	53	49	33.3333	51.9608	46.2264
> 2 spots	59	33	28	50.4274	32.3529	26.4151
2 or more spots	98	86	77	83.7607	84.3137	72.6415
