# Supplementary material for: PPP1R35 is a novel centrosomal protein that regulates centriole length in concert with the microcephaly protein RTTN
Source: eLife journal article supplement (doi:10.7554/elife.37846), 2018-08-31
Supplement: supp [file elife-37846-supp-v1.zip › elife_poa_e37846_Supplementary_file_1.xlsx]

## Sheet: High conf. WT BioID
Bait (BioID)	Prey	PreyGene	Full name	ctrlCounts	Spec	SpecSum	Avg	SAINT	FoldChange	BFDR
FlagBirA-PPP1R35	NP_775901.3	RTTN	rotatin	0|0|0|0|0|0|0|0|0|0|0|0	102|97|77|80	356	89	1	890	0
FlagBirA-PPP1R35	NP_115647.2	TRAF7	TNF receptor associated factor 7	0|0|0|0|0|0|0|0|0|0|0|0	5|6|5|6	22	5.5	1	55	0
FlagBirA-PPP1R35	NP_004413.1	DVL2	dishevelled segment polarity protein 2	14|14|28|30|36|34|23|22|13|9|14|13	157|169|147|154	627	156.75	1	4.48	0
FlagBirA-PPP1R35	NP_065068.1	VANGL2	VANGL planar cell polarity protein 2	0|0|0|0|0|0|0|0|0|0|0|0	9|6|8|8	31	7.75	1	77.5	0
FlagBirA-PPP1R35	NP_064530.1	SH3GLB2	SH3 domain containing GRB2 like, endophilin B2	0|0|0|0|0|0|4|0|0|3|0|0	33|32|27|25	117	29.25	1	8.36	0
FlagBirA-PPP1R35	NP_055799.2	AZI1	centrosomal protein 131	0|0|0|0|0|0|0|0|0|0|0|0	14|12|7|6	39	9.75	1	97.5	0
FlagBirA-PPP1R35	NP_620409.1	VANGL1	VANGL planar cell polarity protein 1	0|2|0|0|0|0|0|0|0|0|0|0	15|13|10|9	47	11.75	0.94	11.75	0.01
FlagBirA-PPP1R35	NP_001129663.1	KANK2	KN motif and ankyrin repeat domains 2	0|0|0|0|2|0|0|0|0|0|2|0	29|29|14|17	89	22.25	1	11.12	0
PPP1R35-BirAFlag	NP_056131.2	PPP1R13B	protein phosphatase 1 regulatory subunit 13B	0|0|0|0|0|0|0|0|0|0|0|0	10|7|7|5	29	7.25	1	72.5	0
PPP1R35-BirAFlag	NP_079479.1	C2orf44	WD repeat and coiled coil containing	0|0|0|0|0|0|0|0|0|0|0|0	4|2|9|6	21	5.25	0.93	52.5	0.01
PPP1R35-BirAFlag	NP_775901.3	RTTN	rotatin	0|0|0|0|0|0|0|0|0|0|0|0	61|47|144|121	373	93.25	1	932.5	0
PPP1R35-BirAFlag	NP_055746.3	PPP6R1	protein phosphatase 6 regulatory subunit 1	0|0|0|0|3|2|7|5|0|0|3|2	25|26|20|22	93	23.25	0.98	3.88	0
PPP1R35-BirAFlag	NP_055619.2	KIAA0753	KIAA0753	0|0|0|0|0|0|0|0|0|0|0|0	3|5|7|4	19	4.75	0.98	47.5	0
PPP1R35-BirAFlag	NP_001099040.1	NUDT19	nudix hydrolase 19	0|0|0|0|0|0|0|0|0|0|0|0	10|7|8|10	35	8.75	1	87.5	0
PPP1R35-BirAFlag	NP_113676.2	L3MBTL2	L3MBTL2, polycomb repressive complex 1 subunit	0|0|0|0|0|0|0|2|3|0|0|0	23|20|17|14	74	18.5	1	7.4	0
PPP1R35-BirAFlag	NP_001129663.1	KANK2	KN motif and ankyrin repeat domains 2	0|0|0|0|2|0|0|0|0|0|2|0	14|10|18|14	56	14	0.98	7	0
PPP1R35-BirAFlag	NP_001135970.1	SIRT1	sirtuin 1	0|0|0|0|0|0|0|0|0|0|0|0	7|6|3|2	18	4.5	0.92	45	0.01
PPP1R35-BirAFlag	NP_055472.1	TTI1	TELO2 interacting protein 1	0|0|0|0|0|0|0|0|0|0|0|0	3|2|11|10	26	6.5	0.92	65	0.01
PPP1R35-BirAFlag	NP_054872.2	ZC3H7A	zinc finger CCCH-type containing 7A	0|0|0|0|0|0|0|0|0|0|0|0	3|5|7|7	22	5.5	0.99	55	0
PPP1R35-BirAFlag	NP_056423.2	C10orf137	erythroid differentiation regulatory factor 1	0|0|0|0|0|0|0|0|0|0|0|0	5|5|12|9	31	7.75	1	77.5	0
PPP1R35-BirAFlag	NP_001243595.1	FAM193A	family with sequence similarity 193 member A	0|0|0|0|0|0|0|0|0|0|0|0	5|3|4|6	18	4.5	0.98	45	0
PPP1R35-BirAFlag	NP_056263.1	DPCD	deleted in primary ciliary dyskinesia homolog (mouse)	0|0|3|3|0|0|9|16|4|4|11|9	59|63|57|55	234	58.5	1	4.33	0
PPP1R35-BirAFlag	NP_073615.2	CEP85	centrosomal protein 85	0|0|0|0|0|0|0|0|0|0|0|0	8|14|3|8	33	8.25	0.99	82.5	0
PPP1R35-BirAFlag	NP_001530.1	DNAJA1	DnaJ heat shock protein family (Hsp40) member A1	4|4|0|7|17|12|15|12|7|12|13|11	81|85|53|56	275	68.75	1	4.3	0
PPP1R35-BirAFlag	NP_003698.1	RUVBL1	RuvB like AAA ATPase 1	49|59|111|96|97|92|317|324|177|167|206|196	1769|1770|2039|2206	7784	1946	1	6.07	0
PPP1R35-BirAFlag	NP_060530.3	IARS2	isoleucyl-tRNA synthetase 2, mitochondrial	2|0|0|2|0|0|2|0|0|0|0|0	19|18|11|16	64	16	0.99	8	0
PPP1R35-BirAFlag	NP_063937.2	GSK3A	glycogen synthase kinase 3 alpha	0|0|0|0|0|0|0|0|0|0|0|0	13|13|3|2	31	7.75	0.92	77.5	0.01
PPP1R35-BirAFlag	NP_005871.1	DNAJA2	DnaJ heat shock protein family (Hsp40) member A2	5|5|8|14|12|10|14|10|10|9|18|15	54|54|51|63	222	55.5	1	3.36	0
PPP1R35-BirAFlag	NP_006657.1	RUVBL2	RuvB like AAA ATPase 2	60|60|76|87|103|99|196|200|88|98|136|131	1181|1217|1271|1640	5309	1327.25	1	6.7	0
PPP1R35-BirAFlag	NP_004738.3	DLG5	discs large MAGUK scaffold protein 5	0|0|0|0|4|2|0|0|2|0|0|0	15|13|17|19	64	16	0.99	5.33	0
PPP1R35-BirAFlag	NP_060421.2	SMPD4	sphingomyelin phosphodiesterase 4	0|0|0|0|0|0|0|0|0|0|0|0	4|3|3|4	14	3.5	0.97	35	0.01
PPP1R35-BirAFlag	NP_055799.2	AZI1	centrosomal protein 131	0|0|0|0|0|0|0|0|0|0|0|0	4|2|6|6	18	4.5	0.93	45	0.01
PPP1R35-BirAFlag	NP_008985.3	KIF3A	kinesin family member 3A	0|0|0|0|0|0|0|0|0|0|0|0	4|6|5|3	18	4.5	0.98	45	0
PPP1R35-BirAFlag	NP_036369.2	SIRT2	sirtuin 2	0|0|0|0|0|0|0|0|0|0|0|0	27|31|26|16	100	25	1	250	0
PPP1R35-BirAFlag	NP_001116835.1	RGPD6	RANBP2-like and GRIP domain containing 6	0|0|0|0|0|0|0|0|0|0|0|0	10|11|14|12	47	11.75	1	117.5	0
PPP1R35-BirAFlag	NP_001120982.1	APC	APC, WNT signaling pathway regulator	0|0|0|0|0|0|0|0|0|0|0|0	6|7|13|10	36	9	1	90	0
PPP1R35-BirAFlag	NP_001129667.1	TNPO2	transportin 2	0|0|0|0|0|0|0|0|0|0|0|0	15|16|34|39	104	26	1	260	0
PPP1R35-BirAFlag	NP_852664.1	PIK3R1	phosphoinositide-3-kinase regulatory subunit 1	0|0|0|0|0|0|0|0|0|0|0|0	5|3|4|4	16	4	0.98	40	0
PPP1R35-BirAFlag	NP_006237.1	PPP2R5E	protein phosphatase 2 regulatory subunit B'epsilon	0|0|0|0|0|0|0|0|0|0|0|0	13|10|5|4	32	8	1	80	0
PPP1R35-BirAFlag	NP_055824.1	PDZRN3	PDZ domain containing ring finger 3	0|0|0|0|0|0|0|0|0|0|0|0	4|4|3|5	16	4	0.98	40	0

## Sheet: High conf. WT FLAPG-IP
Bait (anti FLAG IP-MS)	Prey	PreyGene	Full name	ctrlCounts	Spec	SpecSum	Avg	SAINT	FoldChange	BFDR
FlagBirA-PPP1R35_FIP	NP_775901.3	RTTN	rotatin	0|0|0|0|0|0|0|0|0|0|0|0	15|19|5|5	44	11	1	110	0
FlagBirA-PPP1R35_FIP	NP_060855.2	LSG1	large 60S subunit nuclear export GTPase 1	0|0|0|0|0|0|0|0|0|0|0|0	8|7|3|3	21	5.25	0.98	52.5	0
FlagBirA-PPP1R35_FIP	NP_055699.2	SUGP2	SURP and G-patch domain containing 2	0|0|0|0|0|0|0|0|0|0|0|0	6|3|4|5	18	4.5	0.99	45	0
FlagBirA-PPP1R35_FIP	NP_060365.7	DDX27	DEAD-box helicase 27	0|0|0|0|0|0|0|0|0|0|0|0	3|2|4|4	13	3.25	0.93	32.5	0.01
FlagBirA-PPP1R35_FIP	NP_001177893.1	ZMYM2	zinc finger MYM-type containing 2	0|0|0|0|0|0|0|0|0|0|0|0	3|9|5|7	24	6	0.99	60	0
FlagBirA-PPP1R35_FIP	NP_945314.1	DHX57	DExH-box helicase 57	0|0|0|0|0|0|0|0|0|0|0|0	14|12|5|5	36	9	1	90	0
FlagBirA-PPP1R35_FIP	NP_078930.3	NOL9	nucleolar protein 9	0|0|0|0|0|0|0|0|3|3|0|2	18|28|19|16	81	20.25	1	6.75	0
FlagBirA-PPP1R35_FIP	NP_005086.2	ZMYM4	zinc finger MYM-type containing 4	0|0|0|0|0|0|0|0|0|0|0|0	13|17|10|9	49	12.25	1	122.5	0
FlagBirA-PPP1R35_FIP	NP_001203.1	C1QBP	complement C1q binding protein	17|16|36|31|28|26|26|19|18|23|34|31	293|350|181|139	963	240.75	1	6.88	0
FlagBirA-PPP1R35_FIP	NP_112483.1	LAS1L	LAS1 like, ribosome biogenesis factor	5|7|0|0|0|0|8|4|3|6|5|4	36|29|26|24	115	28.75	0.99	3.83	0
FlagBirA-PPP1R35_FIP	NP_055791.1	PDCD11	programmed cell death 11	0|0|0|0|0|0|0|0|0|0|0|0	3|6|8|7	24	6	0.99	60	0
PPP1R35-BirAFlag_FIP	NP_542198.2	VPS41	VPS41, HOPS complex subunit	0|0|0|0|0|0|0|0|0|0|0|0	6|6|3|3	18	4.5	0.99	45	0
PPP1R35-BirAFlag_FIP	NP_055681.1	SEC16A	SEC16 homolog A, endoplasmic reticulum export factor	0|0|0|0|0|0|0|0|0|0|0|0	4|6|11|12	33	8.25	1	82.5	0
PPP1R35-BirAFlag_FIP	NP_004482.4	ARHGAP35	Rho GTPase activating protein 35	0|0|0|0|0|0|0|0|0|0|0|0	6|8|3|5	22	5.5	0.99	55	0
PPP1R35-BirAFlag_FIP	NP_065922.3	LRCH2	leucine rich repeats and calponin homology domain containing 2	0|0|0|0|0|0|0|0|0|0|0|0	4|4|3|4	15	3.75	0.99	37.5	0
PPP1R35-BirAFlag_FIP	NP_056054.2	AGTPBP1	ATP/GTP binding protein 1	0|0|0|0|0|0|0|0|0|0|0|0	6|5|4|4	19	4.75	1	47.5	0
PPP1R35-BirAFlag_FIP	NP_478070.1	FAM207A	family with sequence similarity 207 member A	0|0|0|0|0|0|0|0|0|0|0|0	3|4|6|4	17	4.25	0.99	42.5	0
PPP1R35-BirAFlag_FIP	NP_071349.3	UBE2O	ubiquitin conjugating enzyme E2 O	0|0|0|0|0|0|0|0|0|0|0|0	5|7|9|13	34	8.5	1	85	0
PPP1R35-BirAFlag_FIP	NP_006755.4	IFRD2	interferon related developmental regulator 2	0|0|0|0|0|0|0|0|0|0|0|0	4|3|2|2	11	2.75	0.92	27.5	0.01
PPP1R35-BirAFlag_FIP	NP_055592.2	URB2	URB2 ribosome biogenesis 2 homolog (S. cerevisiae)	0|0|0|0|0|0|0|0|0|0|0|0	4|4|8|6	22	5.5	1	55	0
PPP1R35-BirAFlag_FIP	NP_078816.2	MRPL24	mitochondrial ribosomal protein L24	0|0|0|0|0|0|0|0|0|0|0|0	5|4|5|3	17	4.25	0.99	42.5	0
PPP1R35-BirAFlag_FIP	NP_060551.2	WRAP53	WD repeat containing antisense to TP53	0|0|0|0|0|0|0|0|0|0|0|0	5|6|6|10	27	6.75	1	67.5	0
PPP1R35-BirAFlag_FIP	NP_001138404.1	PSMB5	proteasome subunit beta 5	0|0|0|0|0|0|0|0|0|0|0|0	4|4|4|4	16	4	1	40	0
PPP1R35-BirAFlag_FIP	NP_060855.2	LSG1	large 60S subunit nuclear export GTPase 1	0|0|0|0|0|0|0|0|0|0|0|0	6|9|5|5	25	6.25	1	62.5	0
PPP1R35-BirAFlag_FIP	NP_057040.2	MRPL4	mitochondrial ribosomal protein L4	0|0|0|0|0|0|0|0|0|0|0|0	3|5|12|10	30	7.5	0.99	75	0
PPP1R35-BirAFlag_FIP	NP_689557.1	LSM12	LSM12 homolog	0|0|0|0|0|0|0|0|0|0|0|0	3|2|6|7	18	4.5	0.96	45	0.01
PPP1R35-BirAFlag_FIP	NP_060829.2	UFSP2	UFM1 specific peptidase 2	0|0|0|0|0|0|2|0|0|0|0|0	23|17|17|19	76	19	1	19	0
PPP1R35-BirAFlag_FIP	NP_055608.2	LCMT2	leucine carboxyl methyltransferase 2	0|0|0|0|0|0|0|0|0|0|0|0	4|8|7|5	24	6	1	60	0
PPP1R35-BirAFlag_FIP	NP_653205.3	ZC3H18	zinc finger CCCH-type containing 18	0|0|0|0|0|0|0|0|0|0|0|0	4|2|6|8	20	5	0.96	50	0.01
PPP1R35-BirAFlag_FIP	NP_073739.3	YTHDC2	YTH domain containing 2	0|2|3|0|2|0|0|0|0|3|0|0	40|35|13|17	105	26.25	1	8.75	0
PPP1R35-BirAFlag_FIP	NP_116045.2	DHX37	DEAH-box helicase 37	0|0|0|0|0|0|0|0|0|0|0|0	5|7|3|3	18	4.5	0.99	45	0
PPP1R35-BirAFlag_FIP	NP_001177893.1	ZMYM2	zinc finger MYM-type containing 2	0|0|0|0|0|0|0|0|0|0|0|0	4|7|9|11	31	7.75	1	77.5	0
PPP1R35-BirAFlag_FIP	NP_036359.2	GTPBP6	GTP binding protein 6 (putative)	0|0|0|0|0|0|0|0|0|0|0|0	9|6|3|3	21	5.25	0.99	52.5	0
PPP1R35-BirAFlag_FIP	NP_001243461.1	MSTO1	misato 1, mitochondrial distribution and morphology regulator	0|2|0|0|0|0|0|0|0|0|0|0	12|10|11|10	43	10.75	0.97	10.75	0
PPP1R35-BirAFlag_FIP	NP_945314.1	DHX57	DExH-box helicase 57	0|0|0|0|0|0|0|0|0|0|0|0	14|13|3|3	33	8.25	0.99	82.5	0
PPP1R35-BirAFlag_FIP	NP_078930.3	NOL9	nucleolar protein 9	0|0|0|0|0|0|0|0|3|3|0|2	27|27|23|26	103	25.75	1	8.58	0
PPP1R35-BirAFlag_FIP	NP_005086.2	ZMYM4	zinc finger MYM-type containing 4	0|0|0|0|0|0|0|0|0|0|0|0	8|9|11|12	40	10	1	100	0
PPP1R35-BirAFlag_FIP	NP_001203.1	C1QBP	complement C1q binding protein	17|16|36|31|28|26|26|19|18|23|34|31	430|436|198|192	1256	314	1	8.97	0
PPP1R35-BirAFlag_FIP	NP_036614.1	ZNF281	zinc finger protein 281	0|0|0|0|0|0|0|0|0|0|0|0	6|5|5|7	23	5.75	1	57.5	0
PPP1R35-BirAFlag_FIP	NP_055791.1	PDCD11	programmed cell death 11	0|0|0|0|0|0|0|0|0|0|0|0	3|2|4|3	12	3	0.95	30	0.01
PPP1R35-BirAFlag_FIP	NP_055111.1	CAPN7	calpain 7	0|0|0|0|0|0|0|0|0|0|0|0	10|14|11|10	45	11.25	1	112.5	0
PPP1R35-BirAFlag_FIP	NP_036273.1	INTS6	integrator complex subunit 6	0|0|0|0|0|0|0|0|0|0|0|0	2|3|3|3	11	2.75	0.94	27.5	0.01
PPP1R35-BirAFlag_FIP	NP_112483.1	LAS1L	LAS1 like, ribosome biogenesis factor	5|7|0|0|0|0|8|4|3|6|5|4	35|41|35|37	148	37	1	4.93	0
PPP1R35-BirAFlag_FIP	NP_001106177.1	SCIN	scinderin	0|0|0|0|0|0|0|0|0|0|0|0	6|4|5|8	23	5.75	1	57.5	0
PPP1R35-BirAFlag_FIP	NP_004442.3	ESRRA	estrogen related receptor alpha	0|0|0|0|0|0|0|0|0|0|0|0	6|3|8|8	25	6.25	0.99	62.5	0
PPP1R35-BirAFlag_FIP	NP_006400.2	ARPC1A	actin related protein 2/3 complex subunit 1A	0|0|0|0|0|0|0|0|0|0|0|0	6|6|8|7	27	6.75	1	67.5	0
PPP1R35-BirAFlag_FIP	NP_057385.3	GPN3	GPN-loop GTPase 3	0|0|0|0|0|0|0|0|0|0|0|0	7|5|3|5	20	5	0.99	50	0
PPP1R35-BirAFlag_FIP	NP_065142.2	MRPL47	mitochondrial ribosomal protein L47	0|0|0|0|0|0|0|0|0|0|0|0	9|9|3|4	25	6.25	0.99	62.5	0
PPP1R35-BirAFlag_FIP	NP_001512.1	GTF3C2	general transcription factor IIIC subunit 2	0|0|0|0|0|0|0|0|0|0|0|0	17|18|12|11	58	14.5	1	145	0
PPP1R35-BirAFlag_FIP	NP_258441.1	FBXO9	F-box protein 9	0|0|0|0|0|0|0|0|0|0|0|0	2|3|3|2	10	2.5	0.91	25	0.01
PPP1R35-BirAFlag_FIP	NP_001311.3	CSNK2B	casein kinase 2 beta	0|0|0|0|0|0|0|0|0|0|0|0	5|3|6|5	19	4.75	0.99	47.5	0
PPP1R35-BirAFlag_FIP	NP_057250.1	PIAS1	protein inhibitor of activated STAT 1	0|0|0|0|0|0|0|0|0|0|0|0	4|6|5|7	22	5.5	1	55	0

## Sheet: All High conf. BioID
Bait (anti FLAG IP-MS)	Prey	PreyGene	Full name	ctrlCounts	Spec	SpecSum	Avg	SAINT	FoldChange	BFDR
PPP1R35-BirAFlag	NP_056131.2	PPP1R13B	protein phosphatase 1 regulatory subunit 13B	0|0|0|0|0|0|0|0|0|0|0|0	10|7|7|5	29	7.25	1	72.5	0
PPP1R35-BirAFlag	NP_079479.1	C2orf44	WD repeat and coiled coil containing	0|0|0|0|0|0|0|0|0|0|0|0	4|2|9|6	21	5.25	0.93	52.5	0.01
PPP1R35-BirAFlag	NP_775901.3	RTTN	rotatin	0|0|0|0|0|0|0|0|0|0|0|0	61|47|144|121	373	93.25	1	932.5	0
PPP1R35-BirAFlag	NP_055746.3	PPP6R1	protein phosphatase 6 regulatory subunit 1	0|0|0|0|3|2|7|5|0|0|3|2	25|26|20|22	93	23.25	0.98	3.88	0
PPP1R35-BirAFlag	NP_055619.2	KIAA0753	KIAA0753	0|0|0|0|0|0|0|0|0|0|0|0	3|5|7|4	19	4.75	0.98	47.5	0
PPP1R35-BirAFlag	NP_001099040.1	NUDT19	nudix hydrolase 19	0|0|0|0|0|0|0|0|0|0|0|0	10|7|8|10	35	8.75	1	87.5	0
PPP1R35-BirAFlag	NP_113676.2	L3MBTL2	L3MBTL2, polycomb repressive complex 1 subunit	0|0|0|0|0|0|0|2|3|0|0|0	23|20|17|14	74	18.5	1	7.4	0
PPP1R35-BirAFlag	NP_001129663.1	KANK2	KN motif and ankyrin repeat domains 2	0|0|0|0|2|0|0|0|0|0|2|0	14|10|18|14	56	14	0.98	7	0
PPP1R35-BirAFlag	NP_001135970.1	SIRT1	sirtuin 1	0|0|0|0|0|0|0|0|0|0|0|0	7|6|3|2	18	4.5	0.92	45	0.01
PPP1R35-BirAFlag	NP_055472.1	TTI1	TELO2 interacting protein 1	0|0|0|0|0|0|0|0|0|0|0|0	3|2|11|10	26	6.5	0.92	65	0.01
PPP1R35-BirAFlag	NP_054872.2	ZC3H7A	zinc finger CCCH-type containing 7A	0|0|0|0|0|0|0|0|0|0|0|0	3|5|7|7	22	5.5	0.99	55	0
PPP1R35-BirAFlag	NP_056423.2	C10orf137	erythroid differentiation regulatory factor 1	0|0|0|0|0|0|0|0|0|0|0|0	5|5|12|9	31	7.75	1	77.5	0
PPP1R35-BirAFlag	NP_001243595.1	FAM193A	family with sequence similarity 193 member A	0|0|0|0|0|0|0|0|0|0|0|0	5|3|4|6	18	4.5	0.98	45	0
PPP1R35-BirAFlag	NP_056263.1	DPCD	deleted in primary ciliary dyskinesia homolog (mouse)	0|0|3|3|0|0|9|16|4|4|11|9	59|63|57|55	234	58.5	1	4.33	0
PPP1R35-BirAFlag	NP_073615.2	CEP85	centrosomal protein 85	0|0|0|0|0|0|0|0|0|0|0|0	8|14|3|8	33	8.25	0.99	82.5	0
PPP1R35-BirAFlag	NP_001530.1	DNAJA1	DnaJ heat shock protein family (Hsp40) member A1	4|4|0|7|17|12|15|12|7|12|13|11	81|85|53|56	275	68.75	1	4.3	0
PPP1R35-BirAFlag	NP_003698.1	RUVBL1	RuvB like AAA ATPase 1	49|59|111|96|97|92|317|324|177|167|206|196	1769|1770|2039|2206	7784	1946	1	6.07	0
PPP1R35-BirAFlag	NP_060530.3	IARS2	isoleucyl-tRNA synthetase 2, mitochondrial	2|0|0|2|0|0|2|0|0|0|0|0	19|18|11|16	64	16	0.99	8	0
PPP1R35-BirAFlag	NP_063937.2	GSK3A	glycogen synthase kinase 3 alpha	0|0|0|0|0|0|0|0|0|0|0|0	13|13|3|2	31	7.75	0.92	77.5	0.01
PPP1R35-BirAFlag	NP_005871.1	DNAJA2	DnaJ heat shock protein family (Hsp40) member A2	5|5|8|14|12|10|14|10|10|9|18|15	54|54|51|63	222	55.5	1	3.36	0
PPP1R35-BirAFlag	NP_006657.1	RUVBL2	RuvB like AAA ATPase 2	60|60|76|87|103|99|196|200|88|98|136|131	1181|1217|1271|1640	5309	1327.25	1	6.7	0
PPP1R35-BirAFlag	NP_004738.3	DLG5	discs large MAGUK scaffold protein 5	0|0|0|0|4|2|0|0|2|0|0|0	15|13|17|19	64	16	0.99	5.33	0
PPP1R35-BirAFlag	NP_060421.2	SMPD4	sphingomyelin phosphodiesterase 4	0|0|0|0|0|0|0|0|0|0|0|0	4|3|3|4	14	3.5	0.97	35	0.01
PPP1R35-BirAFlag	NP_055799.2	AZI1	centrosomal protein 131	0|0|0|0|0|0|0|0|0|0|0|0	4|2|6|6	18	4.5	0.93	45	0.01
PPP1R35-BirAFlag	NP_008985.3	KIF3A	kinesin family member 3A	0|0|0|0|0|0|0|0|0|0|0|0	4|6|5|3	18	4.5	0.98	45	0
PPP1R35-BirAFlag	NP_036369.2	SIRT2	sirtuin 2	0|0|0|0|0|0|0|0|0|0|0|0	27|31|26|16	100	25	1	250	0
PPP1R35-BirAFlag	NP_001116835.1	RGPD6	RANBP2-like and GRIP domain containing 6	0|0|0|0|0|0|0|0|0|0|0|0	10|11|14|12	47	11.75	1	117.5	0
PPP1R35-BirAFlag	NP_001120982.1	APC	APC, WNT signaling pathway regulator	0|0|0|0|0|0|0|0|0|0|0|0	6|7|13|10	36	9	1	90	0
PPP1R35-BirAFlag	NP_001129667.1	TNPO2	transportin 2	0|0|0|0|0|0|0|0|0|0|0|0	15|16|34|39	104	26	1	260	0
PPP1R35-BirAFlag	NP_852664.1	PIK3R1	phosphoinositide-3-kinase regulatory subunit 1	0|0|0|0|0|0|0|0|0|0|0|0	5|3|4|4	16	4	0.98	40	0
PPP1R35-BirAFlag	NP_006237.1	PPP2R5E	protein phosphatase 2 regulatory subunit B'epsilon	0|0|0|0|0|0|0|0|0|0|0|0	13|10|5|4	32	8	1	80	0
PPP1R35-BirAFlag	NP_055824.1	PDZRN3	PDZ domain containing ring finger 3	0|0|0|0|0|0|0|0|0|0|0|0	4|4|3|5	16	4	0.98	40	0
FlagBirA-PPP1R35_AAA	NP_775901.3	RTTN	rotatin	0|0|0|0|0|0|0|0|0|0|0|0	115|120|86|86	407	101.75	1	1017.5	0
FlagBirA-PPP1R35_AAA	NP_003897.2	MCM3AP	minichromosome maintenance complex component 3 associated protein	0|0|0|0|0|0|0|0|0|0|0|0	5|5|3|2	15	3.75	0.92	37.5	0.01
FlagBirA-PPP1R35_AAA	NP_001129663.1	KANK2	KN motif and ankyrin repeat domains 2	0|0|0|0|2|0|0|0|0|0|2|0	20|17|18|22	77	19.25	1	9.62	0
FlagBirA-PPP1R35_AAA	NP_001229712.1	TRIM26	tripartite motif containing 26	0|0|0|0|0|0|0|0|0|0|0|0	3|6|5|4	18	4.5	0.98	45	0
FlagBirA-PPP1R35_AAA	NP_056090.1	KIAA1033	WASH complex subunit 4	0|0|0|0|0|0|0|0|0|0|0|0	9|11|6|5	31	7.75	1	77.5	0
FlagBirA-PPP1R35_AAA	NP_003602.1	OFD1	OFD1, centriole and centriolar satellite protein	2|0|3|0|8|7|6|5|0|2|4|4	29|29|28|24	110	27.5	0.99	3.67	0
FlagBirA-PPP1R35_AAA	NP_055799.2	AZI1	centrosomal protein 131	0|0|0|0|0|0|0|0|0|0|0|0	8|6|4|4	22	5.5	1	55	0
FlagBirA-PPP1R35_AAA	NP_001120982.1	APC	APC, WNT signaling pathway regulator	0|0|0|0|0|0|0|0|0|0|0|0	13|17|6|8	44	11	1	110	0
FlagBirA-PPP1R35_AAA	NP_001124435.1	TMEM194A	nuclear envelope integral membrane protein 1	0|0|0|0|0|0|0|0|0|0|0|0	2|4|4|4	14	3.5	0.93	35	0.01
FlagBirA-PPP1R35_AAA	NP_001129667.1	TNPO2	transportin 2	0|0|0|0|0|0|0|0|0|0|0|0	59|56|29|28	172	43	1	430	0
FlagBirA-PPP1R35_DDD	NP_055935.4	ALMS1	ALMS1, centrosome and basal body associated protein	0|0|0|0|0|0|0|0|0|0|0|0	13|13|3|3	32	8	0.97	80	0
FlagBirA-PPP1R35_DDD	NP_775901.3	RTTN	rotatin	0|0|0|0|0|0|0|0|0|0|0|0	152|142|78|83	455	113.75	1	1137.5	0
FlagBirA-PPP1R35_DDD	NP_056142.2	SMG5	SMG5, nonsense mediated mRNA decay factor	0|0|0|0|0|0|0|0|0|0|0|0	6|5|6|6	23	5.75	1	57.5	0
FlagBirA-PPP1R35_DDD	NP_001120982.1	APC	APC, WNT signaling pathway regulator	0|0|0|0|0|0|0|0|0|0|0|0	18|25|11|9	63	15.75	1	157.5	0
FlagBirA-PPP1R35_DDD	NP_001129667.1	TNPO2	transportin 2	0|0|0|0|0|0|0|0|0|0|0|0	62|46|12|14	134	33.5	1	335	0
FlagBirA-PPP1R35_DDD	NP_056090.1	KIAA1033	WASH complex subunit 4	0|0|0|0|0|0|0|0|0|0|0|0	15|19|3|4	41	10.25	0.98	102.5	0
FlagBirA-PPP1R35_DDD	NP_073615.2	CEP85	centrosomal protein 85	0|0|0|0|0|0|0|0|0|0|0|0	4|7|5|2	18	4.5	0.93	45	0.01
FlagBirA-PPP1R35_DDD	NP_003602.1	OFD1	OFD1, centriole and centriolar satellite protein	2|0|3|0|8|7|6|5|0|2|4|4	45|39|26|35	145	36.25	1	4.83	0
FlagBirA-PPP1R35_DDD	NP_115647.2	TRAF7	TNF receptor associated factor 7	0|0|0|0|0|0|0|0|0|0|0|0	7|7|4|5	23	5.75	1	57.5	0
FlagBirA-PPP1R35_DDD	NP_001129663.1	KANK2	KN motif and ankyrin repeat domains 2	0|0|0|0|2|0|0|0|0|0|2|0	22|21|32|25	100	25	1	12.5	0
FlagBirA-PPP1R35_DDD	NP_588616.1	DIS3L	DIS3 like exosome 3'-5' exoribonuclease	0|0|4|4|8|9|7|8|3|4|4|5	53|43|43|28	167	41.75	1	4.91	0
FlagBirA-PPP1R35_V79A-F81A	NP_055935.4	ALMS1	ALMS1, centrosome and basal body associated protein	0|0|0|0|0|0|0|0|0|0|0|0	3|12|16|4	35	8.75	0.98	87.5	0
FlagBirA-PPP1R35_V79A-F81A	NP_775901.3	RTTN	rotatin	0|0|0|0|0|0|0|0|0|0|0|0	42|156|143|44	385	96.25	1	962.5	0
FlagBirA-PPP1R35_V79A-F81A	NP_056142.2	SMG5	SMG5, nonsense mediated mRNA decay factor	0|0|0|0|0|0|0|0|0|0|0|0	5|8|8|6	27	6.75	1	67.5	0
FlagBirA-PPP1R35_V79A-F81A	NP_001120982.1	APC	APC, WNT signaling pathway regulator	0|0|0|0|0|0|0|0|0|0|0|0	5|14|18|5	42	10.5	1	105	0
FlagBirA-PPP1R35_V79A-F81A	NP_073615.2	CEP85	centrosomal protein 85	0|0|0|0|0|0|0|0|0|0|0|0	7|2|6|3	18	4.5	0.92	45	0.01
FlagBirA-PPP1R35_V79A-F81A	NP_115805.1	LZTS2	leucine zipper tumor suppressor 2	0|0|0|0|0|0|0|0|0|0|0|0	3|10|11|4	28	7	0.98	70	0
FlagBirA-PPP1R35_V79A-F81A	NP_001129663.1	KANK2	KN motif and ankyrin repeat domains 2	0|0|0|0|2|0|0|0|0|0|2|0	22|28|26|30	106	26.5	1	13.25	0
FlagBirA-PPP1R35_V79A-F81A	NP_001129667.1	TNPO2	transportin 2	0|0|0|0|0|0|0|0|0|0|0|0	19|34|41|17	111	27.75	1	277.5	0
FlagBirA-PPP1R35_V79A-F81A	NP_588616.1	DIS3L	DIS3 like exosome 3'-5' exoribonuclease	0|0|4|4|8|9|7|8|3|4|4|5	33|40|38|38	149	37.25	1	4.38	0
FlagBirA-PPP1R35_V79A-F81A	NP_002516.2	NRD1	nardilysin convertase	0|0|0|0|0|0|0|0|0|0|0|0	3|6|3|4	16	4	0.97	40	0.01
FlagBirA-PPP1R35_V79A-F81A	NP_055799.2	AZI1	centrosomal protein 131	0|0|0|0|0|0|0|0|0|0|0|0	3|11|6|3	23	5.75	0.97	57.5	0
FlagBirA-PPP1R35	NP_775901.3	RTTN	rotatin	0|0|0|0|0|0|0|0|0|0|0|0	102|97|77|80	356	89	1	890	0
FlagBirA-PPP1R35	NP_115647.2	TRAF7	TNF receptor associated factor 7	0|0|0|0|0|0|0|0|0|0|0|0	5|6|5|6	22	5.5	1	55	0
FlagBirA-PPP1R35	NP_004413.1	DVL2	dishevelled segment polarity protein 2	14|14|28|30|36|34|23|22|13|9|14|13	157|169|147|154	627	156.75	1	4.48	0
FlagBirA-PPP1R35	NP_065068.1	VANGL2	VANGL planar cell polarity protein 2	0|0|0|0|0|0|0|0|0|0|0|0	9|6|8|8	31	7.75	1	77.5	0
FlagBirA-PPP1R35	NP_064530.1	SH3GLB2	SH3 domain containing GRB2 like, endophilin B2	0|0|0|0|0|0|4|0|0|3|0|0	33|32|27|25	117	29.25	1	8.36	0
FlagBirA-PPP1R35	NP_055799.2	AZI1	centrosomal protein 131	0|0|0|0|0|0|0|0|0|0|0|0	14|12|7|6	39	9.75	1	97.5	0
FlagBirA-PPP1R35	NP_620409.1	VANGL1	VANGL planar cell polarity protein 1	0|2|0|0|0|0|0|0|0|0|0|0	15|13|10|9	47	11.75	0.94	11.75	0.01
FlagBirA-PPP1R35	NP_001129663.1	KANK2	KN motif and ankyrin repeat domains 2	0|0|0|0|2|0|0|0|0|0|2|0	29|29|14|17	89	22.25	1	11.12	0

## Sheet: All High conf. FLAG-IP
Bait (anti FLAG IP-MS)	Prey	PreyGene	Full name	ctrlCounts	Spec	SpecSum	Avg	SAINT	FoldChange	BFDR
FlagBirA-PPP1R35_AAA_FIP	NP_009055.2	UTRN	utrophin	0|0|0|0|0|0|0|0|0|0|0|0	4|4|4|2	14	3.5	0.94	35	0.01
FlagBirA-PPP1R35_AAA_FIP	NP_001036069.1	XRN1	5'-3' exoribonuclease 1	0|0|0|0|0|0|0|0|0|0|0|0	6|6|3|3	18	4.5	0.98	45	0
FlagBirA-PPP1R35_AAA_FIP	NP_775901.3	RTTN	rotatin	0|0|0|0|0|0|0|0|0|0|0|0	6|10|6|6	28	7	1	70	0
FlagBirA-PPP1R35_AAA_FIP	NP_001136067.1	P4HA1	prolyl 4-hydroxylase subunit alpha 1	0|0|0|0|0|0|0|0|0|0|0|0	9|12|5|4	30	7.5	1	75	0
FlagBirA-PPP1R35_AAA_FIP	NP_060855.2	LSG1	large 60S subunit nuclear export GTPase 1	0|0|0|0|0|0|0|0|0|0|0|0	5|6|8|8	27	6.75	1	67.5	0
FlagBirA-PPP1R35_AAA_FIP	NP_073739.3	YTHDC2	YTH domain containing 2	0|2|3|0|2|0|0|0|0|3|0|0	16|19|15|16	66	16.5	1	5.5	0
FlagBirA-PPP1R35_AAA_FIP	NP_149080.2	ZCCHC3	zinc finger CCHC-type containing 3	0|0|0|0|0|0|0|0|0|0|0|0	4|6|2|2	14	3.5	0.89	35	0.01
FlagBirA-PPP1R35_AAA_FIP	NP_001177893.1	ZMYM2	zinc finger MYM-type containing 2	0|0|0|0|0|0|0|0|0|0|0|0	11|10|3|5	29	7.25	0.99	72.5	0
FlagBirA-PPP1R35_AAA_FIP	NP_945314.1	DHX57	DExH-box helicase 57	0|0|0|0|0|0|0|0|0|0|0|0	10|9|15|8	42	10.5	1	105	0
FlagBirA-PPP1R35_AAA_FIP	NP_078930.3	NOL9	nucleolar protein 9	0|0|0|0|0|0|0|0|3|3|0|2	23|23|18|22	86	21.5	1	7.17	0
FlagBirA-PPP1R35_AAA_FIP	NP_001203.1	C1QBP	complement C1q binding protein	17|16|36|31|28|26|26|19|18|23|34|31	247|194|631|680	1752	438	1	12.51	0
FlagBirA-PPP1R35_AAA_FIP	NP_005849.1	AKAP8	A-kinase anchoring protein 8	0|0|0|0|0|0|0|0|0|0|0|0	4|4|2|2	12	3	0.89	30	0.01
FlagBirA-PPP1R35_AAA_FIP	NP_112483.1	LAS1L	LAS1 like, ribosome biogenesis factor	5|7|0|0|0|0|8|4|3|6|5|4	33|28|53|37	151	37.75	1	5.03	0
FlagBirA-PPP1R35_AAA_FIP	NP_005518.3	HSPA1L	heat shock protein family A (Hsp70) member 1 like	79|71|0|0|0|0|0|0|0|0|0|0	240|206|231|250	927	231.75	1	3.09	0
FlagBirA-PPP1R35_AAA_FIP	NP_005086.2	ZMYM4	zinc finger MYM-type containing 4	0|0|0|0|0|0|0|0|0|0|0|0	10|10|11|11	42	10.5	1	105	0
FlagBirA-PPP1R35_AAA_FIP	NP_001512.1	GTF3C2	general transcription factor IIIC subunit 2	0|0|0|0|0|0|0|0|0|0|0|0	10|9|17|12	48	12	1	120	0
FlagBirA-PPP1R35_AAA_FIP	NP_997176.1	MBNL1	muscleblind like splicing regulator 1	0|0|0|0|0|0|0|0|0|0|0|0	7|4|2|4	17	4.25	0.94	42.5	0.01
FlagBirA-PPP1R35_AAA_FIP	NP_055983.1	ZC3H4	zinc finger CCCH-type containing 4	0|0|0|0|0|0|0|0|0|0|0|0	5|4|5|7	21	5.25	1	52.5	0
FlagBirA-PPP1R35_DDD_FIP	NP_775901.3	RTTN	rotatin	0|0|0|0|0|0|0|0|0|0|0|0	13|11|11|8	43	10.75	1	107.5	0
FlagBirA-PPP1R35_DDD_FIP	NP_060855.2	LSG1	large 60S subunit nuclear export GTPase 1	0|0|0|0|0|0|0|0|0|0|0|0	4|6|7|8	25	6.25	1	62.5	0
FlagBirA-PPP1R35_DDD_FIP	NP_060829.2	UFSP2	UFM1 specific peptidase 2	0|0|0|0|0|0|2|0|0|0|0|0	10|10|9|10	39	9.75	0.93	9.75	0.01
FlagBirA-PPP1R35_DDD_FIP	NP_945314.1	DHX57	DExH-box helicase 57	0|0|0|0|0|0|0|0|0|0|0|0	6|5|6|4	21	5.25	1	52.5	0
FlagBirA-PPP1R35_DDD_FIP	NP_078930.3	NOL9	nucleolar protein 9	0|0|0|0|0|0|0|0|3|3|0|2	25|20|15|14	74	18.5	1	6.17	0
FlagBirA-PPP1R35_DDD_FIP	NP_005086.2	ZMYM4	zinc finger MYM-type containing 4	0|0|0|0|0|0|0|0|0|0|0|0	6|3|10|4	23	5.75	0.99	57.5	0
FlagBirA-PPP1R35_DDD_FIP	NP_001203.1	C1QBP	complement C1q binding protein	17|16|36|31|28|26|26|19|18|23|34|31	127|123|418|434	1102	275.5	1	7.87	0
FlagBirA-PPP1R35_DDD_FIP	NP_055791.1	PDCD11	programmed cell death 11	0|0|0|0|0|0|0|0|0|0|0|0	3|3|5|2	13	3.25	0.93	32.5	0.01
FlagBirA-PPP1R35_DDD_FIP	NP_112483.1	LAS1L	LAS1 like, ribosome biogenesis factor	5|7|0|0|0|0|8|4|3|6|5|4	28|23|27|26	104	26	0.97	3.47	0.01
FlagBirA-PPP1R35_DDD_FIP	NP_001244118.1	DDX56	DEAD-box helicase 56	0|0|0|0|0|0|0|0|0|0|0|0	2|3|4|4	13	3.25	0.93	32.5	0.01
FlagBirA-PPP1R35_V79A-F81A_FIP	NP_057085.2	UTP18	UTP18, small subunit processome component	0|0|0|0|0|0|0|0|0|0|0|0	2|4|3|5	14	3.5	0.93	35	0.01
FlagBirA-PPP1R35_V79A-F81A_FIP	NP_055983.1	ZC3H4	zinc finger CCCH-type containing 4	0|0|0|0|0|0|0|0|0|0|0|0	4|7|4|5	20	5	1	50	0
FlagBirA-PPP1R35_V79A-F81A_FIP	NP_775901.3	RTTN	rotatin	0|0|0|0|0|0|0|0|0|0|0|0	6|5|8|7	26	6.5	1	65	0
FlagBirA-PPP1R35_V79A-F81A_FIP	NP_071896.8	NOC3L	NOC3 like DNA replication regulator	0|0|0|0|0|0|0|0|0|0|0|0	9|5|8|5	27	6.75	1	67.5	0
FlagBirA-PPP1R35_V79A-F81A_FIP	NP_060855.2	LSG1	large 60S subunit nuclear export GTPase 1	0|0|0|0|0|0|0|0|0|0|0|0	6|5|12|5	28	7	1	70	0
FlagBirA-PPP1R35_V79A-F81A_FIP	NP_060829.2	UFSP2	UFM1 specific peptidase 2	0|0|0|0|0|0|2|0|0|0|0|0	16|15|24|28	83	20.75	1	20.75	0
FlagBirA-PPP1R35_V79A-F81A_FIP	NP_001244118.1	DDX56	DEAD-box helicase 56	0|0|0|0|0|0|0|0|0|0|0|0	6|6|5|6	23	5.75	1	57.5	0
FlagBirA-PPP1R35_V79A-F81A_FIP	NP_945314.1	DHX57	DExH-box helicase 57	0|0|0|0|0|0|0|0|0|0|0|0	13|14|20|11	58	14.5	1	145	0
FlagBirA-PPP1R35_V79A-F81A_FIP	NP_078930.3	NOL9	nucleolar protein 9	0|0|0|0|0|0|0|0|3|3|0|2	12|23|23|15	73	18.25	0.98	6.08	0
FlagBirA-PPP1R35_V79A-F81A_FIP	NP_005751.2	CEBPZ	CCAAT/enhancer binding protein zeta	0|0|0|0|0|0|0|0|0|0|0|0	12|4|8|8	32	8	1	80	0
FlagBirA-PPP1R35_V79A-F81A_FIP	NP_001203.1	C1QBP	complement C1q binding protein	17|16|36|31|28|26|26|19|18|23|34|31	271|283|198|182	934	233.5	1	6.67	0
FlagBirA-PPP1R35_V79A-F81A_FIP	NP_005769.1	RBM5	RNA binding motif protein 5	0|0|0|0|0|0|0|0|0|0|0|0	5|3|4|3	15	3.75	0.98	37.5	0
FlagBirA-PPP1R35_V79A-F81A_FIP	NP_006224.1	POLR2I	RNA polymerase II subunit I	0|0|0|0|0|0|0|0|0|0|0|0	7|10|2|3	22	5.5	0.94	55	0.01
FlagBirA-PPP1R35_V79A-F81A_FIP	NP_055791.1	PDCD11	programmed cell death 11	0|0|0|0|0|0|0|0|0|0|0|0	7|11|13|16	47	11.75	1	117.5	0
FlagBirA-PPP1R35_V79A-F81A_FIP	NP_005086.2	ZMYM4	zinc finger MYM-type containing 4	0|0|0|0|0|0|0|0|0|0|0|0	7|5|7|7	26	6.5	1	65	0
FlagBirA-PPP1R35_V79A-F81A_FIP	NP_001512.1	GTF3C2	general transcription factor IIIC subunit 2	0|0|0|0|0|0|0|0|0|0|0|0	13|6|10|10	39	9.75	1	97.5	0
FlagBirA-PPP1R35_V79A-F81A_FIP	NP_060547.2	RBM28	RNA binding motif protein 28	0|0|0|0|0|0|0|0|0|0|0|0	3|3|5|8	19	4.75	0.98	47.5	0
FlagBirA-PPP1R35_FIP	NP_775901.3	RTTN	rotatin	0|0|0|0|0|0|0|0|0|0|0|0	15|19|5|5	44	11	1	110	0
FlagBirA-PPP1R35_FIP	NP_060855.2	LSG1	large 60S subunit nuclear export GTPase 1	0|0|0|0|0|0|0|0|0|0|0|0	8|7|3|3	21	5.25	0.98	52.5	0
FlagBirA-PPP1R35_FIP	NP_055699.2	SUGP2	SURP and G-patch domain containing 2	0|0|0|0|0|0|0|0|0|0|0|0	6|3|4|5	18	4.5	0.99	45	0
FlagBirA-PPP1R35_FIP	NP_060365.7	DDX27	DEAD-box helicase 27	0|0|0|0|0|0|0|0|0|0|0|0	3|2|4|4	13	3.25	0.93	32.5	0.01
FlagBirA-PPP1R35_FIP	NP_001177893.1	ZMYM2	zinc finger MYM-type containing 2	0|0|0|0|0|0|0|0|0|0|0|0	3|9|5|7	24	6	0.99	60	0
FlagBirA-PPP1R35_FIP	NP_945314.1	DHX57	DExH-box helicase 57	0|0|0|0|0|0|0|0|0|0|0|0	14|12|5|5	36	9	1	90	0
FlagBirA-PPP1R35_FIP	NP_078930.3	NOL9	nucleolar protein 9	0|0|0|0|0|0|0|0|3|3|0|2	18|28|19|16	81	20.25	1	6.75	0
FlagBirA-PPP1R35_FIP	NP_005086.2	ZMYM4	zinc finger MYM-type containing 4	0|0|0|0|0|0|0|0|0|0|0|0	13|17|10|9	49	12.25	1	122.5	0
FlagBirA-PPP1R35_FIP	NP_001203.1	C1QBP	complement C1q binding protein	17|16|36|31|28|26|26|19|18|23|34|31	293|350|181|139	963	240.75	1	6.88	0
FlagBirA-PPP1R35_FIP	NP_112483.1	LAS1L	LAS1 like, ribosome biogenesis factor	5|7|0|0|0|0|8|4|3|6|5|4	36|29|26|24	115	28.75	0.99	3.83	0
FlagBirA-PPP1R35_FIP	NP_055791.1	PDCD11	programmed cell death 11	0|0|0|0|0|0|0|0|0|0|0|0	3|6|8|7	24	6	0.99	60	0
PPP1R35-BirAFlag_FIP	NP_542198.2	VPS41	VPS41, HOPS complex subunit	0|0|0|0|0|0|0|0|0|0|0|0	6|6|3|3	18	4.5	0.99	45	0
PPP1R35-BirAFlag_FIP	NP_055681.1	SEC16A	SEC16 homolog A, endoplasmic reticulum export factor	0|0|0|0|0|0|0|0|0|0|0|0	4|6|11|12	33	8.25	1	82.5	0
PPP1R35-BirAFlag_FIP	NP_004482.4	ARHGAP35	Rho GTPase activating protein 35	0|0|0|0|0|0|0|0|0|0|0|0	6|8|3|5	22	5.5	0.99	55	0
PPP1R35-BirAFlag_FIP	NP_065922.3	LRCH2	leucine rich repeats and calponin homology domain containing 2	0|0|0|0|0|0|0|0|0|0|0|0	4|4|3|4	15	3.75	0.99	37.5	0
PPP1R35-BirAFlag_FIP	NP_056054.2	AGTPBP1	ATP/GTP binding protein 1	0|0|0|0|0|0|0|0|0|0|0|0	6|5|4|4	19	4.75	1	47.5	0
PPP1R35-BirAFlag_FIP	NP_478070.1	FAM207A	family with sequence similarity 207 member A	0|0|0|0|0|0|0|0|0|0|0|0	3|4|6|4	17	4.25	0.99	42.5	0
PPP1R35-BirAFlag_FIP	NP_071349.3	UBE2O	ubiquitin conjugating enzyme E2 O	0|0|0|0|0|0|0|0|0|0|0|0	5|7|9|13	34	8.5	1	85	0
PPP1R35-BirAFlag_FIP	NP_006755.4	IFRD2	interferon related developmental regulator 2	0|0|0|0|0|0|0|0|0|0|0|0	4|3|2|2	11	2.75	0.92	27.5	0.01
PPP1R35-BirAFlag_FIP	NP_055592.2	URB2	URB2 ribosome biogenesis 2 homolog (S. cerevisiae)	0|0|0|0|0|0|0|0|0|0|0|0	4|4|8|6	22	5.5	1	55	0
PPP1R35-BirAFlag_FIP	NP_078816.2	MRPL24	mitochondrial ribosomal protein L24	0|0|0|0|0|0|0|0|0|0|0|0	5|4|5|3	17	4.25	0.99	42.5	0
PPP1R35-BirAFlag_FIP	NP_060551.2	WRAP53	WD repeat containing antisense to TP53	0|0|0|0|0|0|0|0|0|0|0|0	5|6|6|10	27	6.75	1	67.5	0
PPP1R35-BirAFlag_FIP	NP_001138404.1	PSMB5	proteasome subunit beta 5	0|0|0|0|0|0|0|0|0|0|0|0	4|4|4|4	16	4	1	40	0
PPP1R35-BirAFlag_FIP	NP_060855.2	LSG1	large 60S subunit nuclear export GTPase 1	0|0|0|0|0|0|0|0|0|0|0|0	6|9|5|5	25	6.25	1	62.5	0
PPP1R35-BirAFlag_FIP	NP_057040.2	MRPL4	mitochondrial ribosomal protein L4	0|0|0|0|0|0|0|0|0|0|0|0	3|5|12|10	30	7.5	0.99	75	0
PPP1R35-BirAFlag_FIP	NP_689557.1	LSM12	LSM12 homolog	0|0|0|0|0|0|0|0|0|0|0|0	3|2|6|7	18	4.5	0.96	45	0.01
PPP1R35-BirAFlag_FIP	NP_060829.2	UFSP2	UFM1 specific peptidase 2	0|0|0|0|0|0|2|0|0|0|0|0	23|17|17|19	76	19	1	19	0
PPP1R35-BirAFlag_FIP	NP_055608.2	LCMT2	leucine carboxyl methyltransferase 2	0|0|0|0|0|0|0|0|0|0|0|0	4|8|7|5	24	6	1	60	0
PPP1R35-BirAFlag_FIP	NP_653205.3	ZC3H18	zinc finger CCCH-type containing 18	0|0|0|0|0|0|0|0|0|0|0|0	4|2|6|8	20	5	0.96	50	0.01
PPP1R35-BirAFlag_FIP	NP_073739.3	YTHDC2	YTH domain containing 2	0|2|3|0|2|0|0|0|0|3|0|0	40|35|13|17	105	26.25	1	8.75	0
PPP1R35-BirAFlag_FIP	NP_116045.2	DHX37	DEAH-box helicase 37	0|0|0|0|0|0|0|0|0|0|0|0	5|7|3|3	18	4.5	0.99	45	0
PPP1R35-BirAFlag_FIP	NP_001177893.1	ZMYM2	zinc finger MYM-type containing 2	0|0|0|0|0|0|0|0|0|0|0|0	4|7|9|11	31	7.75	1	77.5	0
PPP1R35-BirAFlag_FIP	NP_036359.2	GTPBP6	GTP binding protein 6 (putative)	0|0|0|0|0|0|0|0|0|0|0|0	9|6|3|3	21	5.25	0.99	52.5	0
PPP1R35-BirAFlag_FIP	NP_001243461.1	MSTO1	misato 1, mitochondrial distribution and morphology regulator	0|2|0|0|0|0|0|0|0|0|0|0	12|10|11|10	43	10.75	0.97	10.75	0
PPP1R35-BirAFlag_FIP	NP_945314.1	DHX57	DExH-box helicase 57	0|0|0|0|0|0|0|0|0|0|0|0	14|13|3|3	33	8.25	0.99	82.5	0
PPP1R35-BirAFlag_FIP	NP_078930.3	NOL9	nucleolar protein 9	0|0|0|0|0|0|0|0|3|3|0|2	27|27|23|26	103	25.75	1	8.58	0
PPP1R35-BirAFlag_FIP	NP_005086.2	ZMYM4	zinc finger MYM-type containing 4	0|0|0|0|0|0|0|0|0|0|0|0	8|9|11|12	40	10	1	100	0
PPP1R35-BirAFlag_FIP	NP_001203.1	C1QBP	complement C1q binding protein	17|16|36|31|28|26|26|19|18|23|34|31	430|436|198|192	1256	314	1	8.97	0
PPP1R35-BirAFlag_FIP	NP_036614.1	ZNF281	zinc finger protein 281	0|0|0|0|0|0|0|0|0|0|0|0	6|5|5|7	23	5.75	1	57.5	0
PPP1R35-BirAFlag_FIP	NP_055791.1	PDCD11	programmed cell death 11	0|0|0|0|0|0|0|0|0|0|0|0	3|2|4|3	12	3	0.95	30	0.01
PPP1R35-BirAFlag_FIP	NP_055111.1	CAPN7	calpain 7	0|0|0|0|0|0|0|0|0|0|0|0	10|14|11|10	45	11.25	1	112.5	0
PPP1R35-BirAFlag_FIP	NP_036273.1	INTS6	integrator complex subunit 6	0|0|0|0|0|0|0|0|0|0|0|0	2|3|3|3	11	2.75	0.94	27.5	0.01
PPP1R35-BirAFlag_FIP	NP_112483.1	LAS1L	LAS1 like, ribosome biogenesis factor	5|7|0|0|0|0|8|4|3|6|5|4	35|41|35|37	148	37	1	4.93	0
PPP1R35-BirAFlag_FIP	NP_001106177.1	SCIN	scinderin	0|0|0|0|0|0|0|0|0|0|0|0	6|4|5|8	23	5.75	1	57.5	0
PPP1R35-BirAFlag_FIP	NP_004442.3	ESRRA	estrogen related receptor alpha	0|0|0|0|0|0|0|0|0|0|0|0	6|3|8|8	25	6.25	0.99	62.5	0
PPP1R35-BirAFlag_FIP	NP_006400.2	ARPC1A	actin related protein 2/3 complex subunit 1A	0|0|0|0|0|0|0|0|0|0|0|0	6|6|8|7	27	6.75	1	67.5	0
PPP1R35-BirAFlag_FIP	NP_057385.3	GPN3	GPN-loop GTPase 3	0|0|0|0|0|0|0|0|0|0|0|0	7|5|3|5	20	5	0.99	50	0
PPP1R35-BirAFlag_FIP	NP_065142.2	MRPL47	mitochondrial ribosomal protein L47	0|0|0|0|0|0|0|0|0|0|0|0	9|9|3|4	25	6.25	0.99	62.5	0
PPP1R35-BirAFlag_FIP	NP_001512.1	GTF3C2	general transcription factor IIIC subunit 2	0|0|0|0|0|0|0|0|0|0|0|0	17|18|12|11	58	14.5	1	145	0
PPP1R35-BirAFlag_FIP	NP_258441.1	FBXO9	F-box protein 9	0|0|0|0|0|0|0|0|0|0|0|0	2|3|3|2	10	2.5	0.91	25	0.01
PPP1R35-BirAFlag_FIP	NP_001311.3	CSNK2B	casein kinase 2 beta	0|0|0|0|0|0|0|0|0|0|0|0	5|3|6|5	19	4.75	0.99	47.5	0
PPP1R35-BirAFlag_FIP	NP_057250.1	PIAS1	protein inhibitor of activated STAT 1	0|0|0|0|0|0|0|0|0|0|0|0	4|6|5|7	22	5.5	1	55	0

## Sheet: Comparison BioID WT mut
			FlagBirA-PPP1R35_BioID				FlagBirA-PPP1R35_V79A-F81A_BioID				V79A-F81A/WT	FlagBirA-PPP1R35_AAA_BioID				AAA/WT	FlagBirA-PPP1R35_DDD_BioID				DDD/WT	PPP1R35-BirAFlag_BioID				C-ter/N-ter
PreyID	Full name	Controls	Spec	SpecSum	fold change	SAINT	Spec	SpecSum	fold change	SAINT	log2 fc	Spec	SpecSum	fold change	SAINT	log2 fc	Spec	SpecSum	fold change	SAINT	log2 fc	Spec	SpecSum	fold change	SAINT	log2 fc
RTTN	rotatin	0|0|0|0|0|0|0|0|0|0|0|0	102|97|77|80	356	890	1	42|156|143|44	385	962.5	1	0.112677	115|120|86|86	407	1017.5	1	0.192645	152|142|78|83	455	1137.5	1	0.35311	61|47|144|121	373	932.5	1	0.0671142
AZI1	centrosomal protein 131	0|0|0|0|0|0|0|0|0|0|0|0	14|12|7|6	39	97.5	1	3|11|6|3	23	57.5	0.97	-0.736966	8|6|4|4	22	55	1	-0.798366	7|7|0|3	17	42.5	0.74	-1.152	4|2|6|6	18	45	0.93	-1.074
VANGL2	VANGL planar cell polarity protein 2	0|0|0|0|0|0|0|0|0|0|0|0	9|6|8|8	31	77.5	1					-5					-5	5|6|0|0	11	27.5	0.5	-1.41504					-5
TRAF7	TNF receptor associated factor 7	0|0|0|0|0|0|0|0|0|0|0|0	5|6|5|6	22	55	1	2|2|4|0	8	20	0.62	-1.35364	5|2|0|2	9	22.5	0.62	-1.20163	7|7|4|5	23	57.5	1	0.0614005					-4.52356
KANK2	KN motif and ankyrin repeat domains 2	0|0|0|0|2|0|0|0|0|0|2|0	29|29|14|17	89	11.12	1	22|28|26|30	106	13.25	1	0.249614	20|17|18|22	77	9.62	1	-0.206451	22|21|32|25	100	12.5	1	0.166358	14|10|18|14	56	7	0.98	-0.658963
SH3GLB2	SH3 domain containing GRB2 like, endophilin B2	0|0|0|0|0|0|4|0|0|3|0|0	33|32|27|25	117	8.36	1	3|10|5|0	18	1.29	0.04	-2.63472	3|0|0|0	3	0.21	0	-4.88264	9|12|0|0	21	1.5	0.19	-2.42321					-6.88264
DVL2	dishevelled segment polarity protein 2	14|14|28|30|36|34|23|22|13|9|14|13	157|169|147|154	627	4.48	1	77|81|81|72	311	2.22	0	-1.00922	126|112|40|42	320	2.29	0.5	-0.968191	154|134|49|43	380	2.71	0.5	-0.720974	34|35|21|22	112	0.8	0	-2.47444
VANGL1	VANGL planar cell polarity protein 1	0|2|0|0|0|0|0|0|0|0|0|0	15|13|10|9	47	11.75	0.94					-5.58496					-5.58496	3|10|0|0	13	3.25	0.25	-1.77761	0|4|0|0	4	1	0.05	-3.26303
TNPO2	transportin 2	0|0|0|0|0|0|0|0|0|0|0|0	10|0|40|26	76	190	0.75	19|34|41|17	111	277.5	1	0.540568	59|56|29|28	172	430	1	1.16784	62|46|12|14	134	335	1	0.810029	15|16|34|39	104	260	1	0.447459
C2orf44	WD repeat and coiled coil containing	0|0|0|0|0|0|0|0|0|0|0|0	2|6|4|0	12	30	0.68	0|14|13|0	27	67.5	0.5		12|7|0|0	19	47.5	0.5		9|13|2|0	24	60	0.69		4|2|9|6	21	52.5	0.93	0.758992
LZTS2	leucine zipper tumor suppressor 2	0|0|0|0|0|0|0|0|0|0|0|0	4|2|0|5	11	27.5	0.68	3|10|11|4	28	70	0.98	1.27302	12|3|0|4	19	47.5	0.73		18|21|7|0	46	115	0.75
TMEM194A	nuclear envelope integral membrane protein 1	0|0|0|0|0|0|0|0|0|0|0|0	5|3|0|2	10	25	0.67	2|2|2|2	8	20	0.74		2|4|4|4	14	35	0.93	0.447459	0|2|0|2	4	10	0.37		3|3|2|2	10	25	0.85
CEP85	centrosomal protein 85	0|0|0|0|0|0|0|0|0|0|0|0	3|3|0|2	8	20	0.66	7|2|6|3	18	45	0.92	1.078	3|0|3|4	10	25	0.72		4|7|5|2	18	45	0.93	1.078	8|14|3|8	33	82.5	0.99	1.91754
FAM193A	family with sequence similarity 193 member A	0|0|0|0|0|0|0|0|0|0|0|0	2|4|0|2	8	20	0.62	0|4|4|0	8	20	0.5		3|5|0|0	8	20	0.49		8|7|0|2	17	42.5	0.69		5|3|4|6	18	45	0.98	1.078
DLG5	discs large MAGUK scaffold protein 5	0|0|0|0|4|2|0|0|2|0|0|0	31|30|8|7	76	6.33	0.53	9|21|24|16	70	5.83	0.81		13|12|9|11	45	3.75	0.72		19|21|12|10	62	5.17	0.85		15|13|17|19	64	5.33	0.99	-0.244419
ALMS1	ALMS1, centrosome and basal body associated protein	0|0|0|0|0|0|0|0|0|0|0|0	6|4|0|0	10	25	0.5	3|12|16|4	35	87.5	0.98	1.71049	3|10|2|3	18	45	0.91		13|13|3|3	32	80	0.97	1.58496	3|0|5|4	12	30	0.73
PPP1R13B	protein phosphatase 1 regulatory subunit 13B	0|0|0|0|0|0|0|0|0|0|0|0	4|4|0|0	8	20	0.5	0|5|0|3	8	20	0.49		5|6|0|0	11	27.5	0.5		8|4|0|0	12	30	0.5		10|7|7|5	29	72.5	1	1.73697
OFD1	OFD1, centriole and centriolar satellite protein	2|0|3|0|8|7|6|5|0|2|4|4	29|25|12|11	77	2.57	0.5	21|39|49|21	130	4.33	0.68		29|29|28|24	110	3.67	0.99	0.509014	45|39|26|35	145	4.83	1	0.904422	13|9|25|25	72	2.4	0.49
APC	APC, WNT signaling pathway regulator	0|0|0|0|0|0|0|0|0|0|0|0	3|3|0|0	6	15	0.47	5|14|18|5	42	105	1	2.61891	13|17|6|8	44	110	1	2.6845	18|25|11|9	63	157.5	1	3.19265	6|7|13|10	36	90	1	2.4021
KIAA1033	WASH complex subunit 4	0|0|0|0|0|0|0|0|0|0|0|0	2|0|0|5	7	17.5	0.44	0|16|11|0	27	67.5	0.5		9|11|6|5	31	77.5	1	2	15|19|3|4	41	102.5	0.98	2.39232	0|0|6|4	10	25	0.5
SMPD4	sphingomyelin phosphodiesterase 4	0|0|0|0|0|0|0|0|0|0|0|0	2|0|2|0	4	10	0.37	0|0|2|0	2	5	0.19												4|3|3|4	14	35	0.97	1.58496
ZC3H7A	zinc finger CCCH-type containing 7A	0|0|0|0|0|0|0|0|0|0|0|0	5|0|0|0	5	12.5	0.25	0|0|2|2	4	10	0.37		0|4|0|0	4	10	0.25		0|0|2|0	2	5	0.19		3|5|7|7	22	55	0.99	1.9386
TRIM26	tripartite motif containing 26	0|0|0|0|0|0|0|0|0|0|0|0	4|0|0|0	4	10	0.25	0|10|7|4	21	52.5	0.75		3|6|5|4	18	45	0.98	1.926	7|3|0|0	10	25	0.49		0|5|10|7	22	55	0.75
NRD1	nardilysin convertase	0|0|0|0|0|0|0|0|0|0|0|0	0|3|0|0	3	7.5	0.24	3|6|3|4	16	40	0.97	2.08746	0|4|0|0	4	10	0.25		0|0|0|2	2	5	0.19		2|4|0|2	8	20	0.62
GSK3A	glycogen synthase kinase 3 alpha	0|0|0|0|0|0|0|0|0|0|0|0	0|2|0|0	2	5	0.19	0|0|0|4	4	10	0.25							0|3|0|0	3	7.5	0.24		13|13|3|2	31	77.5	0.92	3.41504
IARS2	isoleucyl-tRNA synthetase 2, mitochondrial	2|0|0|2|0|0|2|0|0|0|0|0	4|3|7|0	14	1.75	0.09	0|0|3|2	5	0.62	0		0|0|3|0	3	0.38	0		0|4|2|0	6	0.75	0		19|18|11|16	64	8	0.99	2.11548
DIS3L	DIS3 like exosome 3'-5' exoribonuclease	0|0|4|4|8|9|7|8|3|4|4|5	14|15|16|12	57	1.68	0	33|40|38|38	149	4.38	1	1.37084	40|45|23|27	135	3.97	0.8		53|43|43|28	167	4.91	1	1.53434	19|22|23|14	78	2.29	0.08
RUVBL2	RuvB like AAA ATPase 2	60|60|76|87|103|99|196|200|88|98|136|131	249|252|251|270	1022	1.29	0	326|184|171|192	873	1.1	0		177|208|210|201	796	1.01	0		203|198|202|196	799	1.01	0		1181|1217|1271|1640	5309	6.7	1	2.37591
DPCD	deleted in primary ciliary dyskinesia homolog (mouse)	0|0|3|3|0|0|9|16|4|4|11|9	11|8|22|24	65	1.2	0	21|23|24|21	89	1.65	0		31|31|10|12	84	1.56	0		26|24|17|14	81	1.5	0		59|63|57|55	234	4.33	1	1.83212
RUVBL1	RuvB like AAA ATPase 1	49|59|111|96|97|92|317|324|177|167|206|196	300|312|354|336	1302	1.02	0	402|247|270|301	1220	0.95	0		228|259|265|279	1031	0.8	0		295|280|282|320	1177	0.92	0		1769|1770|2039|2206	7784	6.07	1	2.57886
DNAJA1	DnaJ heat shock protein family (Hsp40) member A1	4|4|0|7|17|12|15|12|7|12|13|11	17|18|11|9	55	0.86	0	15|22|12|3	52	0.81	0		8|11|6|3	28	0.44	0		13|14|9|4	40	0.62	0		81|85|53|56	275	4.3	1	2.30117
PPP6R1	protein phosphatase 6 regulatory subunit 1	0|0|0|0|3|2|7|5|0|0|3|2	6|4|4|5	19	0.79	0	6|8|8|6	28	1.17	0		0|8|3|5	16	0.67	0		8|7|4|3	22	0.92	0		25|26|20|22	93	3.88	0.98	2.23266
DNAJA2	DnaJ heat shock protein family (Hsp40) member A2	5|5|8|14|12|10|14|10|10|9|18|15	8|9|13|15	45	0.68	0	15|24|17|23	79	1.2	0		26|12|2|5	45	0.68	0		20|22|7|12	61	0.92	0		54|54|51|63	222	3.36	1	2.27734
KIAA0753	KIAA0753	0|0|0|0|0|0|0|0|0|0|0|0					4|4|3|0	11	27.5	0.73		0|6|0|0	6	15	0.25		7|7|3|0	17	42.5	0.74		3|5|7|4	19	47.5	0.98	4.32193
SMG5	SMG5, nonsense mediated mRNA decay factor	0|0|0|0|0|0|0|0|0|0|0|0					5|8|8|6	27	67.5	1	4.80735	6|5|0|4	15	37.5	0.75		6|5|6|6	23	57.5	1	4.58496	0|0|12|11	23	57.5	0.5
SIRT2	sirtuin 2	0|0|0|0|0|0|0|0|0|0|0|0																				27|31|26|16	100	250	1	6.65821
MCM3AP	minichromosome maintenance complex component 3 associated protein	0|0|0|0|0|0|0|0|0|0|0|0										5|5|3|2	15	37.5	0.92	4	0|0|2|0	2	5	0.19
RGPD6	RANBP2-like and GRIP domain containing 6	0|0|0|0|0|0|0|0|0|0|0|0										0|0|0|15	15	37.5	0.25		0|0|21|0	21	52.5	0.25		10|11|14|12	47	117.5	1	5.58496
C10orf137	erythroid differentiation regulatory factor 1	0|0|0|0|0|0|0|0|0|0|0|0					0|6|5|0	11	27.5	0.5		0|0|3|0	3	7.5	0.24		0|3|4|0	7	17.5	0.48		5|5|12|9	31	77.5	1	5
KIF3A	kinesin family member 3A	0|0|0|0|0|0|0|0|0|0|0|0					0|4|0|0	4	10	0.25		0|2|0|0	2	5	0.19		0|3|0|2	5	12.5	0.42		4|6|5|3	18	45	0.98	4.24793
NUDT19	nudix hydrolase 19	0|0|0|0|0|0|0|0|0|0|0|0																				10|7|8|10	35	87.5	1	5.16993
PPP2R5E	protein phosphatase 2 regulatory subunit B'epsilon	0|0|0|0|0|0|0|0|0|0|0|0																				13|10|5|4	32	80	1	5.04439
L3MBTL2	L3MBTL2, polycomb repressive complex 1 subunit	0|0|0|0|0|0|0|2|3|0|0|0																				23|20|17|14	74	7.4	1	6.22882
PIK3R1	phosphoinositide-3-kinase regulatory subunit 1	0|0|0|0|0|0|0|0|0|0|0|0																				5|3|4|4	16	40	0.98	4.08746
PDZRN3	PDZ domain containing ring finger 3	0|0|0|0|0|0|0|0|0|0|0|0																				4|4|3|5	16	40	0.98	4.08746
TTI1	TELO2 interacting protein 1	0|0|0|0|0|0|0|0|0|0|0|0																				3|2|11|10	26	65	0.92	4.75489
SIRT1	sirtuin 1	0|0|0|0|0|0|0|0|0|0|0|0																				7|6|3|2	18	45	0.92	4.24793

## Sheet: Comparison FLAG-IP WT mut
			FlagBirA-PPP1R35_FIP				FlagBirA-PPP1R35_V79A-F81A_FIP				V79A-F81A/WT	FlagBirA-PPP1R35_AAA_FIP				AAA/WT	FlagBirA-PPP1R35_DDD_FIP				DDD/WT	PPP1R35-BirAFlag_FIP				C-ter/N-ter
PreyID	Full name	Controls	Spec	SpecSum	fold change	SAINT	Spec	SpecSum	fold change	SAINT	log2 fc	Spec	SpecSum	fold change	SAINT	log2 fc	Spec	SpecSum	fold change	SAINT	log2 fc	Spec	SpecSum	fold change	SAINT	log2 fc
ZMYM4	zinc finger MYM-type containing 4	0|0|0|0|0|0|0|0|0|0|0|0	13|17|10|9	49	122.5	1	7|5|7|7	26	65	1	-0.888969	10|10|11|11	42	105	1	-0.217591	6|3|10|4	23	57.5	0.99	-1.05889	8|9|11|12	40	100	1	-0.286304
RTTN	rotatin	0|0|0|0|0|0|0|0|0|0|0|0	15|19|5|5	44	110	1	6|5|8|7	26	65	1	-0.736966	6|10|6|6	28	70	1	-0.633872	13|11|11|8	43	107.5	1	-0.0324215	2|0|0|0	2	5	0.21	-3.90689
DHX57	DExH-box helicase 57	0|0|0|0|0|0|0|0|0|0|0|0	14|12|5|5	36	90	1	13|14|20|11	58	145	1	0.67319	10|9|15|8	42	105	1	0.216811	6|5|6|4	21	52.5	1	-0.750022	14|13|3|3	33	82.5	0.99	-0.121991
C1QBP	complement C1q binding protein	17|16|36|31|28|26|26|19|18|23|34|31	293|350|181|139	963	6.88	1	271|283|198|182	934	6.67	1	-0.0440668	247|194|631|680	1752	12.51	1	0.862721	127|123|418|434	1102	7.87	1	0.194328	430|436|198|192	1256	8.97	1	0.38288
NOL9	nucleolar protein 9	0|0|0|0|0|0|0|0|3|3|0|2	18|28|19|16	81	6.75	1	12|23|23|15	73	6.08	0.98	-0.148099	23|23|18|22	86	7.17	1	0.0853915	25|20|15|14	74	6.17	1	-0.128733	27|27|23|26	103	8.58	1	0.342888
PDCD11	programmed cell death 11	0|0|0|0|0|0|0|0|0|0|0|0	3|6|8|7	24	60	0.99	7|11|13|16	47	117.5	1	0.941106	10|7|0|6	23	57.5	0.75	-0.0588937	3|3|5|2	13	32.5	0.93	-0.836501	3|2|4|3	12	30	0.95	-0.943416
ZMYM2	zinc finger MYM-type containing 2	0|0|0|0|0|0|0|0|0|0|0|0	3|9|5|7	24	60	0.99	0|0|9|6	15	37.5	0.5	-0.643856	11|10|3|5	29	72.5	0.99	0.263034	8|6|0|3	17	42.5	0.74	-0.473931	4|7|9|11	31	77.5	1	0.356144
SUGP2	SURP and G-patch domain containing 2	0|0|0|0|0|0|0|0|0|0|0|0	6|3|4|5	18	45	0.99	0|2|10|9	21	52.5	0.7	0.211504	8|4|5|0	17	42.5	0.75	-0.0780025	4|3|0|0	7	17.5	0.49	-1.24793	2|0|3|2	7	17.5	0.67	-1.24793
LAS1L	LAS1 like, ribosome biogenesis factor	5|7|0|0|0|0|8|4|3|6|5|4	36|29|26|24	115	3.83	0.99	19|26|31|27	103	3.43	0.76	-0.157541	33|28|53|37	151	5.03	1	0.389947	28|23|27|26	104	3.47	0.97	-0.143735	35|41|35|37	148	4.93	1	0.361188
LSG1	large 60S subunit nuclear export GTPase 1	0|0|0|0|0|0|0|0|0|0|0|0	8|7|3|3	21	52.5	0.98	6|5|12|5	28	70	1	0.398549	5|6|8|8	27	67.5	1	0.347923	4|6|7|8	25	62.5	1	0.241008	6|9|5|5	25	62.5	1	0.241008
DDX27	DEAD-box helicase 27	0|0|0|0|0|0|0|0|0|0|0|0	3|2|4|4	13	32.5	0.93	0|2|4|4	10	25	0.69	-0.347923	4|3|0|0	7	17.5	0.49	-0.807355	0|4|0|0	4	10	0.25	-1.48543	0|0|2|3	5	12.5	0.46	-1.22239
LCMT2	leucine carboxyl methyltransferase 2	0|0|0|0|0|0|0|0|0|0|0|0	2|3|2|4	11	27.5	0.88						2|2|0|0	4	10	0.39		0|4|2|0	6	15	0.44		4|8|7|5	24	60	1	1.05889
UFSP2	UFM1 specific peptidase 2	0|0|0|0|0|0|2|0|0|0|0|0	12|6|15|16	49	12.25	0.88	16|15|24|28	83	20.75	1	0.748461	15|13|9|5	42	10.5	0.81		10|10|9|10	39	9.75	0.93	-0.321928	23|17|17|19	76	19	1	0.62293
YTHDC2	YTH domain containing 2	0|2|3|0|2|0|0|0|0|3|0|0	11|13|10|16	50	4.17	0.83	12|9|27|36	84	7	0.8		16|19|15|16	66	5.5	1	0.393664	11|12|10|7	40	3.33	0.58		40|35|13|17	105	8.75	1	1.0555
ZC3H4	zinc finger CCCH-type containing 4	0|0|0|0|0|0|0|0|0|0|0|0	8|11|0|5	24	60	0.75	4|7|4|5	20	50	1	-0.251539	5|4|5|7	21	52.5	1	-0.184425						0|0|9|8	17	42.5	0.5
GTF3C2	general transcription factor IIIC subunit 2	0|0|0|0|0|0|0|0|0|0|0|0	11|8|3|0	22	55	0.74	13|6|10|10	39	97.5	1	0.798366	10|9|17|12	48	120	1	1.09115	0|4|11|8	23	57.5	0.75		17|18|12|11	58	145	1	1.35908
DDX56	DEAD-box helicase 56	0|0|0|0|0|0|0|0|0|0|0|0	4|9|0|3	16	40	0.74	6|6|5|6	23	57.5	1	0.4975	0|3|3|5	11	27.5	0.73		2|3|4|4	13	32.5	0.93	-0.280108	4|0|3|2	9	22.5	0.7
UTP18	UTP18, small subunit processome component	0|0|0|0|0|0|0|0|0|0|0|0	4|0|3|5	12	30	0.74	2|4|3|5	14	35	0.93	0.206451	0|2|0|3	5	12.5	0.44		2|3|0|0	5	12.5	0.44		0|3|4|3	10	25	0.73
VPS41	VPS41, HOPS complex subunit	0|0|0|0|0|0|0|0|0|0|0|0	3|3|3|0	9	22.5	0.72	0|0|6|0	6	15	0.25		3|0|0|0	3	7.5	0.24		0|6|0|0	6	15	0.25		6|6|3|3	18	45	0.99	0.925999
ZCCHC3	zinc finger CCHC-type containing 3	0|0|0|0|0|0|0|0|0|0|0|0	0|2|4|4	10	25	0.69	0|0|3|2	5	12.5	0.44		4|6|2|2	14	35	0.89	0.447459	5|5|0|0	10	25	0.5		0|0|4|5	9	22.5	0.5
AKAP8	A-kinase anchoring protein 8	0|0|0|0|0|0|0|0|0|0|0|0	3|2|5|0	10	25	0.69	0|2|6|5	13	32.5	0.7		4|4|2|2	12	30	0.89	0.241008	2|3|0|0	5	12.5	0.44		0|2|3|5	10	25	0.7
GPN3	GPN-loop GTPase 3	0|0|0|0|0|0|0|0|0|0|0|0	4|2|2|0	8	20	0.64	2|0|2|3	7	17.5	0.63		0|0|0|2	2	5	0.2		2|0|0|5	7	17.5	0.45		7|5|3|5	20	50	0.99	1.22239
CEBPZ	CCAAT/enhancer binding protein zeta	0|0|0|0|0|0|0|0|0|0|0|0	0|3|2|2	7	17.5	0.63	12|4|8|8	32	80	1	2.04439	2|6|3|0	11	27.5	0.69		0|3|2|0	5	12.5	0.44		0|0|4|5	9	22.5	0.5
ZNF281	zinc finger protein 281	0|0|0|0|0|0|0|0|0|0|0|0	2|2|0|3	7	17.5	0.63	0|3|0|3	6	15	0.48		0|0|3|2	5	12.5	0.44		0|3|0|0	3	7.5	0.24		6|5|5|7	23	57.5	1	1.58496
DHX37	DEAH-box helicase 37	0|0|0|0|0|0|0|0|0|0|0|0	2|0|2|2	6	15	0.59	0|0|5|4	9	22.5	0.5		0|0|2|0	2	5	0.2							5|7|3|3	18	45	0.99	1.44057
LRCH2	leucine rich repeats and calponin homology domain containing 2	0|0|0|0|0|0|0|0|0|0|0|0	0|0|5|6	11	27.5	0.5	0|2|5|4	11	27.5	0.69		3|3|4|0	10	25	0.73		5|4|0|4	13	32.5	0.75		4|4|3|4	15	37.5	0.99	0.415037
CAPN7	calpain 7	0|0|0|0|0|0|0|0|0|0|0|0	0|0|4|5	9	22.5	0.5	0|0|4|0	4	10	0.25		0|4|2|0	6	15	0.44		0|2|2|2	6	15	0.59		10|14|11|10	45	112.5	1	2.20163
AGTPBP1	ATP/GTP binding protein 1	0|0|0|0|0|0|0|0|0|0|0|0	0|4|5|0	9	22.5	0.5	0|0|9|4	13	32.5	0.5		4|3|0|0	7	17.5	0.49		4|6|0|0	10	25	0.5		6|5|4|4	19	47.5	1	1
RBM5	RNA binding motif protein 5	0|0|0|0|0|0|0|0|0|0|0|0	0|0|4|5	9	22.5	0.5	5|3|4|3	15	37.5	0.98	0.678072	6|2|0|0	8	20	0.45		5|3|0|0	8	20	0.49		0|3|0|0	3	7.5	0.24
MBNL1	muscleblind like splicing regulator 1	0|0|0|0|0|0|0|0|0|0|0|0	0|0|6|3	9	22.5	0.49	2|0|2|3	7	17.5	0.63		7|4|2|4	17	42.5	0.94	0.847997	3|0|2|0	5	12.5	0.44		0|5|4|4	13	32.5	0.75
WRAP53	WD repeat containing antisense to TP53	0|0|0|0|0|0|0|0|0|0|0|0	3|0|0|3	6	15	0.48	0|0|0|4	4	10	0.25		5|5|3|0	13	32.5	0.74		0|0|4|0	4	10	0.25		5|6|6|10	27	67.5	1	2
SEC16A	SEC16 homolog A, endoplasmic reticulum export factor	0|0|0|0|0|0|0|0|0|0|0|0	3|3|0|0	6	15	0.48	0|0|6|6	12	30	0.5		0|5|3|4	12	30	0.74		0|3|0|3	6	15	0.48		4|6|11|12	33	82.5	1	2.28011
GTPBP6	GTP binding protein 6 (putative)	0|0|0|0|0|0|0|0|0|0|0|0	3|3|0|0	6	15	0.48						3|0|0|0	3	7.5	0.24							9|6|3|3	21	52.5	0.99	1.65208
ARPC1A	actin related protein 2/3 complex subunit 1A	0|0|0|0|0|0|0|0|0|0|0|0	4|2|0|0	6	15	0.44						0|0|0|3	3	7.5	0.24		0|0|2|0	2	5	0.2		6|6|8|7	27	67.5	1	2
FAM207A	family with sequence similarity 207 member A	0|0|0|0|0|0|0|0|0|0|0|0	2|0|3|0	5	12.5	0.44	0|4|5|4	13	32.5	0.75		2|2|0|0	4	10	0.39		0|4|3|0	7	17.5	0.49		3|4|6|4	17	42.5	0.99	1.58496
NOC3L	NOC3 like DNA replication regulator	0|0|0|0|0|0|0|0|0|0|0|0	0|3|0|2	5	12.5	0.44	9|5|8|5	27	67.5	1	2.22239	3|3|6|0	12	30	0.73		0|3|3|3	9	22.5	0.72		0|0|4|3	7	17.5	0.49
ESRRA	estrogen related receptor alpha	0|0|0|0|0|0|0|0|0|0|0|0	0|0|2|2	4	10	0.39	0|0|5|7	12	30	0.5		0|0|4|2	6	15	0.44		5|0|0|6	11	27.5	0.5		6|3|8|8	25	62.5	0.99	2.37851
UBE2O	ubiquitin conjugating enzyme E2 O	0|0|0|0|0|0|0|0|0|0|0|0	0|2|0|2	4	10	0.39	0|0|4|5	9	22.5	0.5		3|4|0|0	7	17.5	0.49		3|2|0|0	5	12.5	0.44		5|7|9|13	34	85	1	2.80735
XRN1	5'-3' exoribonuclease 1	0|0|0|0|0|0|0|0|0|0|0|0	0|0|0|3	3	7.5	0.24	0|0|5|4	9	22.5	0.5		6|6|3|3	18	45	0.98	2.24793	2|2|4|3	11	27.5	0.88		0|0|3|0	3	7.5	0.24
PIAS1	protein inhibitor of activated STAT 1	0|0|0|0|0|0|0|0|0|0|0|0	0|3|0|0	3	7.5	0.24	0|0|0|5	5	12.5	0.25		4|5|0|3	12	30	0.74		2|2|0|0	4	10	0.39		4|6|5|7	22	55	1	2.52356
URB2	URB2 ribosome biogenesis 2 homolog (S. cerevisiae)	0|0|0|0|0|0|0|0|0|0|0|0	0|3|0|0	3	7.5	0.24	2|0|4|4	10	25	0.69							0|0|0|3	3	7.5	0.24		4|4|8|6	22	55	1	2.52356
ZC3H18	zinc finger CCCH-type containing 18	0|0|0|0|0|0|0|0|0|0|0|0	0|3|0|0	3	7.5	0.24	2|0|0|3	5	12.5	0.44												4|2|6|8	20	50	0.96	2.39232
INTS6	integrator complex subunit 6	0|0|0|0|0|0|0|0|0|0|0|0	0|3|0|0	3	7.5	0.24	0|2|2|0	4	10	0.39												2|3|3|3	11	27.5	0.94	1.58496
CSNK2B	casein kinase 2 beta	0|0|0|0|0|0|0|0|0|0|0|0	0|0|2|0	2	5	0.2	0|0|4|0	4	10	0.25		0|0|4|3	7	17.5	0.49		0|3|0|5	8	20	0.49		5|3|6|5	19	47.5	0.99	2.73697
UTRN	utrophin	0|0|0|0|0|0|0|0|0|0|0|0	2|0|0|0	2	5	0.2	3|0|8|3	14	35	0.73		4|4|4|2	14	35	0.94	2.32193	2|4|0|0	6	15	0.44		0|0|2|0	2	5	0.21
MSTO1	misato 1, mitochondrial distribution and morphology regulator	0|2|0|0|0|0|0|0|0|0|0|0	0|0|4|0	4	1	0.06	0|0|0|2	2	0.5	0.01												12|10|11|10	43	10.75	0.97	3.1375
HSPA1L	heat shock protein family A (Hsp70) member 1 like	79|71|0|0|0|0|0|0|0|0|0|0	156|153|0|0	309	1.03	0	75|64|279|226	644	2.15	0.5		240|206|231|250	927	3.09	1	1.58186	226|192|187|212	817	2.72	0.56		180|178|155|0	513	1.71	0
ARHGAP35	Rho GTPase activating protein 35	0|0|0|0|0|0|0|0|0|0|0|0					0|0|5|0	5	12.5	0.25		3|0|0|0	3	7.5	0.24		3|0|0|0	3	7.5	0.24		6|8|3|5	22	55	0.99	4.52356
LSM12	LSM12 homolog	0|0|0|0|0|0|0|0|0|0|0|0										4|0|0|0	4	10	0.25							3|2|6|7	18	45	0.96	4.24793
RBM28	RNA binding motif protein 28	0|0|0|0|0|0|0|0|0|0|0|0					3|3|5|8	19	47.5	0.98	4.32193	0|4|0|0	4	10	0.25							0|0|3|0	3	7.5	0.24
FBXO9	F-box protein 9	0|0|0|0|0|0|0|0|0|0|0|0					2|0|0|0	2	5	0.2		0|0|0|2	2	5	0.2		2|0|3|2	7	17.5	0.63		2|3|3|2	10	25	0.91	3.45943
POLR2I	RNA polymerase II subunit I	0|0|0|0|0|0|0|0|0|0|0|0					7|10|2|3	22	55	0.94	4.52356	0|0|6|3	9	22.5	0.49		8|0|9|6	23	57.5	0.75		0|0|6|6	12	30	0.5
IFRD2	interferon related developmental regulator 2	0|0|0|0|0|0|0|0|0|0|0|0					0|0|2|0	2	5	0.2							0|3|0|0	3	7.5	0.24		4|3|2|2	11	27.5	0.92	3.58496
P4HA1	prolyl 4-hydroxylase subunit alpha 1	0|0|0|0|0|0|0|0|0|0|0|0					0|0|17|10	27	67.5	0.5		9|12|5|4	30	75	1	4.9542
SCIN	scinderin	0|0|0|0|0|0|0|0|0|0|0|0										3|2|0|0	5	12.5	0.44		0|5|0|0	5	12.5	0.25		6|4|5|8	23	57.5	1	4.58496
PSMB5	proteasome subunit beta 5	0|0|0|0|0|0|0|0|0|0|0|0																				4|4|4|4	16	40	1	4.08746

## Sheet: BioID raw
Bait	Prey	PreyGene	ctrlCounts	Spec	SpecSum	Avg	SAINT	FoldChange	BFDR
PPP1R35-BirAFlag	NP_003925.1	FUBP3	6|5|10|10|5|5|24|22|10|11|13|14	41|38|12|16	107	26.75	0	1.16	0.9
PPP1R35-BirAFlag	NP_001348.2	DHX9	40|52|101|103|115|122|128|124|79|79|108|113	104|103|88|90	385	96.25	0	0.76	0.94
PPP1R35-BirAFlag	NP_001511.2	GTF3C1	2|0|7|11|5|0|10|11|4|6|10|5	11|13|4|13	41	10.25	0	0.93	0.89
PPP1R35-BirAFlag	NP_689759.2	SRFBP1	0|0|0|0|0|0|20|18|6|9|5|3	3|5|0|0	8	2	0	0.11	0.94
PPP1R35-BirAFlag	NP_002408.3	MKI67	66|63|110|129|199|189|397|384|127|124|167|189	102|92|32|41	267	66.75	0	0.17	0.94
PPP1R35-BirAFlag	NP_071504.2	PC	613|635|1396|1392|1282|1304|298|300|347|333|461|469	897|924|914|884	3619	904.75	0	0.65	0.94
PPP1R35-BirAFlag	NP_058633.2	POLA1	0|0|8|10|11|8|18|17|11|5|11|11	5|7|11|10	33	8.25	0	0.47	0.93
PPP1R35-BirAFlag	NP_001737.1	CANX	10|13|13|16|11|7|14|19|9|10|14|13	8|9|3|0	20	5	0	0.29	0.94
PPP1R35-BirAFlag	NP_001742.1	CARS	0|0|0|0|0|0|9|8|0|2|0|2	2|2|0|0	4	1	0	0.12	0.91
PPP1R35-BirAFlag	NP_003133.1	SSB	4|4|29|27|16|14|45|34|16|27|52|56	20|18|13|12	63	15.75	0	0.29	0.94
PPP1R35-BirAFlag	NP_005137.1	SART1	0|6|18|11|13|19|62|63|31|32|33|40	29|27|16|17	89	22.25	0	0.36	0.94
PPP1R35-BirAFlag	NP_004747.1	NUMBL	0|2|0|3|7|6|10|10|3|5|6|5	4|4|0|0	8	2	0	0.2	0.94
PPP1R35-BirAFlag	NP_066964.1	XRCC5	10|9|35|24|22|20|8|4|7|10|20|20	10|12|25|27	74	18.5	0	0.63	0.93
PPP1R35-BirAFlag	NP_067000.1	LSM2	2|0|0|0|0|0|7|0|0|0|7|14	4|6|0|0	10	2.5	0	0.24	0.91
PPP1R35-BirAFlag	NP_002931.2	ABCE1	4|4|13|8|17|23|24|19|5|7|9|9	28|28|6|8	70	17.5	0	0.74	0.92
PPP1R35-BirAFlag	NP_001035810.1	G6PD	0|2|5|5|0|4|17|14|7|6|10|6	2|3|0|0	5	1.25	0	0.08	0.94
PPP1R35-BirAFlag	NP_057558.3	C3orf19	0|0|0|0|0|0|11|13|0|0|4|4	5|5|0|0	10	2.5	0	0.21	0.92
PPP1R35-BirAFlag	NP_064502.9	LARS	20|23|73|66|35|34|55|60|27|21|45|46	51|57|41|44	193	48.25	0	0.69	0.94
PPP1R35-BirAFlag	NP_001035828.1	TROVE2	3|5|8|0|3|3|9|9|5|6|10|10	4|5|0|0	9	2.25	0	0.23	0.94
PPP1R35-BirAFlag	NP_065857.1	GPHN	6|10|8|6|15|14|12|11|7|7|7|3	14|10|9|5	38	9.5	0	0.66	0.91
PPP1R35-BirAFlag	NP_055445.2	ZNF592	0|0|0|0|2|0|0|0|0|0|0|0	4|0|0|0	4	1	0.05	1	0.65
PPP1R35-BirAFlag	NP_060716.2	CCDC25	3|4|4|6|14|14|23|19|16|11|14|10	7|6|0|0	13	3.25	0	0.15	0.94
PPP1R35-BirAFlag	NP_005819.3	DCAF7	3|3|6|8|7|5|8|8|4|4|0|0	13|10|3|6	32	8	0	1	0.83
PPP1R35-BirAFlag	NP_036265.3	COPG2	68|77|169|181|141|146|147|172|107|127|226|241	92|99|138|129	458	114.5	0	0.49	0.94
PPP1R35-BirAFlag	NP_001596.2	AARS	7|3|17|18|7|7|26|31|12|10|32|28	21|18|6|11	56	14	0	0.44	0.94
PPP1R35-BirAFlag	NP_001035879.1	PSPC1	13|17|31|24|17|18|54|56|36|34|55|50	17|20|16|19	72	18	0	0.32	0.94
PPP1R35-BirAFlag	NP_059107.1	SMN2	0|0|11|8|0|0|7|7|0|0|10|3	7|7|6|9	29	7.25	0	0.69	0.9
PPP1R35-BirAFlag	NP_001081.1	ABCF1	7|8|16|16|22|20|61|61|21|9|23|28	19|17|3|4	43	10.75	0	0.18	0.94
PPP1R35-BirAFlag	NP_005683.2	ABCF2	8|9|17|22|27|25|19|18|10|10|19|22	17|21|19|22	79	19.75	0	0.76	0.93
PPP1R35-BirAFlag	NP_001035905.1	CAST	3|2|15|15|10|11|28|28|14|11|14|14	10|2|0|2	14	3.5	0	0.12	0.94
PPP1R35-BirAFlag	NP_001035814.1	CYLD	0|0|0|2|3|4|7|10|0|3|5|0	7|10|18|19	54	13.5	0	1.59	0.76
PPP1R35-BirAFlag	NP_150247.2	PML	6|4|0|3|0|0|9|5|5|4|4|5	3|4|0|2	9	2.25	0	0.3	0.9
PPP1R35-BirAFlag	NP_008878.3	SRP72	0|4|5|8|4|6|11|7|3|6|18|13	3|0|6|5	14	3.5	0	0.23	0.94
PPP1R35-BirAFlag	NP_056269.1	LARP7	0|2|0|2|10|10|19|21|4|6|6|3	8|9|0|0	17	4.25	0	0.21	0.93
PPP1R35-BirAFlag	NP_006435.2	SMC2	15|10|20|14|24|29|17|18|11|9|7|10	13|15|6|9	43	10.75	0	0.41	0.94
PPP1R35-BirAFlag	NP_067038.1	RPRD1B	0|3|10|11|7|6|16|12|11|12|21|17	8|8|9|8	33	8.25	0	0.43	0.94
PPP1R35-BirAFlag	NP_001036005.1	NCBP2	0|0|0|0|0|0|0|0|0|0|0|0	4|3|0|0	7	1.75	0.48	17.5	0.32
PPP1R35-BirAFlag	NP_055935.4	ALMS1	0|0|0|0|0|0|0|0|0|0|0|0	3|0|5|4	12	3	0.73	30	0.09
PPP1R35-BirAFlag	NP_066952.1	PPA1	10|9|19|18|26|19|24|23|16|15|18|19	25|20|11|9	65	16.25	0	0.65	0.93
PPP1R35-BirAFlag	NP_009055.2	UTRN	7|10|35|36|51|48|38|39|19|29|32|40	28|21|21|29	99	24.75	0	0.5	0.94
PPP1R35-BirAFlag	NP_001036069.1	XRN1	26|21|48|48|80|65|74|80|42|36|54|49	120|113|95|81	409	102.25	0	1.28	0.94
PPP1R35-BirAFlag	NP_001244.1	CDC5L	7|11|29|28|38|28|57|57|14|18|33|33	28|24|22|25	99	24.75	0	0.43	0.94
PPP1R35-BirAFlag	NP_891553.2	KLC1	19|18|32|26|40|43|23|17|8|5|11|14	18|17|17|8	60	15	0	0.36	0.94
PPP1R35-BirAFlag	NP_001036100.1	NGDN	0|0|0|0|0|0|2|3|0|0|0|0	2|4|0|0	6	1.5	0	0.6	0.76
PPP1R35-BirAFlag	NP_066944.1	EEF1B2	6|10|14|15|11|14|22|23|15|9|17|11	19|15|17|13	64	16	0	0.71	0.93
PPP1R35-BirAFlag	NP_036399.3	HSPBP1	0|0|0|0|0|0|3|0|0|0|0|0	5|7|3|3	18	4.5	0.13	3	0.62
PPP1R35-BirAFlag	NP_065859.3	SIPA1L2	0|0|0|2|0|0|0|0|2|0|0|0	9|5|7|10	31	7.75	0.55	3.88	0.18
PPP1R35-BirAFlag	NP_055940.3	CIC	0|0|0|0|0|0|6|7|0|0|0|0	5|3|0|0	8	2	0	0.31	0.88
PPP1R35-BirAFlag	NP_036252.1	CD2AP	52|62|139|134|179|188|221|223|116|125|160|186	89|85|83|77	334	83.5	0	0.38	0.94
PPP1R35-BirAFlag	NP_000971.1	RPL18A	0|0|7|8|14|12|10|0|0|3|4|3	15|6|17|16	54	13.5	0	1.04	0.9
PPP1R35-BirAFlag	NP_068803.1	HIST1H4J	56|53|116|101|97|84|99|104|57|57|64|71	69|70|49|57	245	61.25	0	0.56	0.94
PPP1R35-BirAFlag	NP_003283.2	TPR	83|87|157|155|241|225|114|126|68|69|110|99	70|73|67|70	280	70	0	0.3	0.94
PPP1R35-BirAFlag	NP_001041664.1	RCC1	4|0|0|0|8|7|7|6|0|2|8|0	8|8|3|5	24	6	0	0.75	0.88
PPP1R35-BirAFlag	NP_055642.3	ZC3H11A	6|3|3|8|15|13|72|69|23|18|18|22	14|14|5|6	39	9.75	0	0.14	0.94
PPP1R35-BirAFlag	NP_004805.2	SNRNP40	5|3|10|9|15|10|11|11|7|6|10|11	5|5|8|9	27	6.75	0	0.52	0.94
PPP1R35-BirAFlag	NP_055987.2	PRRC2C	13|18|24|25|53|52|33|26|8|9|16|17	47|38|33|31	149	37.25	0	0.71	0.94
PPP1R35-BirAFlag	NP_000687.3	ALDH9A1	0|0|0|0|0|0|0|0|0|0|0|0	2|0|0|0	2	0.5	0.19	5	0.55
PPP1R35-BirAFlag	NP_076412.3	PHACTR4	3|0|11|6|12|9|5|5|10|6|8|9	6|5|5|6	22	5.5	0	0.48	0.94
PPP1R35-BirAFlag	NP_037414.3	UHRF1	0|0|2|6|3|2|0|5|3|3|9|7	11|19|0|2	32	8	0	1	0.73
PPP1R35-BirAFlag	NP_071384.1	CXorf56	9|11|7|8|15|13|72|80|19|23|46|56	27|26|0|0	53	13.25	0	0.17	0.94
PPP1R35-BirAFlag	NP_071415.1	MCCC2	188|201|415|407|415|396|115|110|97|99|143|139	316|291|211|231	1049	262.25	0	0.63	0.94
PPP1R35-BirAFlag	NP_001070152.1	UBTF	0|0|4|3|0|0|16|16|11|3|6|7	7|8|2|4	21	5.25	0	0.33	0.93
PPP1R35-BirAFlag	NP_003042.3	SLC16A1	0|0|5|0|10|8|11|13|3|5|6|0	24|22|4|3	53	13.25	0	1.1	0.82
PPP1R35-BirAFlag	NP_071496.1	EIF4H	0|3|0|0|0|0|13|10|7|7|8|9	12|9|0|0	21	5.25	0	0.46	0.9
PPP1R35-BirAFlag	NP_057212.1	COPG1	0|0|29|5|4|5|4|0|2|4|8|3	6|10|4|0	20	5	0	0.27	0.93
PPP1R35-BirAFlag	NP_997226.2	RNF214	0|0|0|0|2|2|5|4|0|0|0|0	4|3|0|0	7	1.75	0	0.39	0.84
PPP1R35-BirAFlag	NP_689531.2	C12orf45	0|0|0|5|0|0|10|10|12|11|14|9	13|11|12|10	46	11.5	0	0.88	0.91
PPP1R35-BirAFlag	NP_006049.3	TNIP1	3|3|3|2|7|10|3|3|0|0|0|0	6|5|2|0	13	3.25	0	0.38	0.9
PPP1R35-BirAFlag	NP_064551.3	MCCC1	298|368|627|680|640|652|139|129|126|114|124|122	335|357|300|315	1307	326.75	0	0.49	0.94
PPP1R35-BirAFlag	NP_002038.2	GARS	2|0|3|4|0|0|2|0|4|0|2|0	4|2|0|0	6	1.5	0	0.38	0.82
PPP1R35-BirAFlag	NP_057487.2	CWC15	4|3|14|11|8|8|33|32|17|17|15|20	8|9|0|0	17	4.25	0	0.13	0.94
PPP1R35-BirAFlag	NP_057147.2	HDDC2	3|3|9|8|3|2|13|12|8|7|17|16	4|0|0|0	4	1	0	0.06	0.94
PPP1R35-BirAFlag	NP_057479.2	PTPLAD1	15|12|35|46|14|14|18|17|34|28|47|30	19|19|33|29	100	25	0	0.54	0.94
PPP1R35-BirAFlag	NP_003929.4	AP3D1	7|8|19|15|24|23|18|19|22|18|30|25	33|28|45|33	139	34.75	0	1.26	0.91
PPP1R35-BirAFlag	NP_060289.2	RG9MTD1	0|0|2|6|0|0|0|7|3|3|3|5	7|6|0|0	13	3.25	0	0.5	0.86
PPP1R35-BirAFlag	NP_060941.2	ZC3H15	4|5|9|7|9|8|23|22|15|11|22|19	20|19|11|11	61	15.25	0	0.68	0.93
PPP1R35-BirAFlag	NP_060506.5	ATG2B	33|35|89|85|109|95|57|61|52|51|81|76	150|141|217|215	723	180.75	0	1.77	0.93
PPP1R35-BirAFlag	NP_057085.2	UTP18	0|0|2|5|0|0|4|5|2|2|2|2	5|4|3|0	12	3	0	0.6	0.84
PPP1R35-BirAFlag	NP_001072113.1	CDC16	0|0|4|8|11|11|9|7|0|5|3|5	32|19|14|13	78	19.5	0.22	1.77	0.54
PPP1R35-BirAFlag	NP_001246.2	CDC20	0|0|0|0|0|0|7|6|0|0|0|0	8|5|3|0	16	4	0	0.62	0.85
PPP1R35-BirAFlag	NP_004652.2	CDC23	2|3|12|14|11|10|5|5|0|0|0|2	18|19|14|12	63	15.75	0	1.21	0.89
PPP1R35-BirAFlag	NP_001072983.1	TBCE	0|0|5|7|6|6|20|21|8|10|26|26	6|7|4|0	17	4.25	0	0.16	0.94
PPP1R35-BirAFlag	NP_056197.2	HECTD1	0|0|5|6|9|12|4|4|3|3|6|9	6|6|11|12	35	8.75	0	0.83	0.89
PPP1R35-BirAFlag	NP_056474.2	RSL1D1	5|5|19|19|14|14|8|5|5|6|14|15	6|0|9|8	23	5.75	0	0.3	0.94
PPP1R35-BirAFlag	NP_001071634.1	SRSF1	0|0|3|4|21|17|13|12|6|4|9|4	7|5|0|3	15	3.75	0	0.2	0.94
PPP1R35-BirAFlag	NP_116165.1	JMJD1C	2|9|14|11|42|42|30|26|16|15|19|18	36|38|34|31	139	34.75	0	0.83	0.94
PPP1R35-BirAFlag	NP_001073027.1	HNRNPUL2	0|4|0|5|4|8|6|4|0|4|0|7	3|3|0|0	6	1.5	0	0.2	0.94
PPP1R35-BirAFlag	NP_001072992.1	PAICS	34|24|59|50|61|64|80|73|46|46|41|40	47|43|30|31	151	37.75	0	0.49	0.94
PPP1R35-BirAFlag	NP_005144.2	USP10	14|12|20|13|25|27|14|9|10|13|11|15	16|13|17|17	63	15.75	0	0.61	0.93
PPP1R35-BirAFlag	NP_006378.3	CHERP	7|8|22|20|29|29|45|38|20|26|39|45	16|17|14|15	62	15.5	0	0.34	0.94
PPP1R35-BirAFlag	NP_005210.3	DIAPH1	0|4|8|7|14|17|8|7|0|0|4|6	2|0|3|0	5	1.25	0	0.08	0.94
PPP1R35-BirAFlag	NP_072045.1	RPS18	4|6|10|10|10|4|2|2|3|4|4|3	5|7|4|0	16	4	0	0.4	0.91
PPP1R35-BirAFlag	NP_001351.2	DHCR7	2|2|5|0|5|0|0|0|0|3|7|0	5|4|0|0	9	2.25	0	0.38	0.87
PPP1R35-BirAFlag	NP_001427.2	FBL	14|18|23|19|34|32|31|31|19|16|17|26	35|31|18|16	100	25	0	0.76	0.93
PPP1R35-BirAFlag	NP_055160.2	ZNF318	5|10|13|11|27|29|34|30|22|11|10|17	15|12|0|2	29	7.25	0	0.23	0.94
PPP1R35-BirAFlag	NP_056131.2	PPP1R13B	0|0|0|0|0|0|0|0|0|0|0|0	10|7|7|5	29	7.25	1	72.5	0
PPP1R35-BirAFlag	NP_079366.3	USP36	0|0|0|0|0|0|8|8|0|0|4|0	2|0|0|0	2	0.5	0	0.06	0.91
PPP1R35-BirAFlag	NP_056154.1	ADNP	12|8|19|20|26|30|34|42|25|33|40|34	20|19|26|27	92	23	0	0.56	0.94
PPP1R35-BirAFlag	NP_001073884.1	U2SURP	16|23|23|22|47|50|59|58|37|34|34|41	28|22|12|13	75	18.75	0	0.32	0.94
PPP1R35-BirAFlag	NP_001073919.1	BEND3	0|0|0|0|0|0|3|0|0|0|0|0	4|7|0|2	13	3.25	0.1	2.17	0.63
PPP1R35-BirAFlag	NP_001074012.1	C19orf29	0|0|0|0|2|2|28|24|19|21|26|24	11|9|7|6	33	8.25	0	0.31	0.94
PPP1R35-BirAFlag	NP_056536.2	GEMIN4	0|0|0|3|2|3|0|0|0|0|0|0	5|3|7|7	22	5.5	0.01	1.83	0.69
PPP1R35-BirAFlag	NP_056147.2	NUDCD3	0|2|7|10|0|0|10|11|5|5|15|13	31|29|45|46	151	37.75	0.5	2.7	0.22
PPP1R35-BirAFlag	NP_597709.2	RAVER1	0|0|0|0|0|0|2|2|0|6|11|9	18|15|13|17	63	15.75	0	1.57	0.83
PPP1R35-BirAFlag	NP_277048.2	TPGS1	12|15|42|43|41|35|0|0|3|2|8|15	13|14|38|36	101	25.25	0	0.59	0.94
PPP1R35-BirAFlag	NP_073733.1	KLC2	5|6|8|6|12|12|10|7|5|3|4|3	4|2|9|6	21	5.25	0	0.44	0.91
PPP1R35-BirAFlag	NP_005678.3	FARSB	5|4|21|30|8|11|11|11|3|4|13|14	10|6|7|11	34	8.5	0	0.33	0.94
PPP1R35-BirAFlag	NP_036526.2	PFDN2	6|7|5|7|6|5|20|15|9|9|7|8	30|30|10|9	79	19.75	0	1.13	0.89
PPP1R35-BirAFlag	NP_002614.2	PFDN4	0|0|0|0|3|2|10|11|0|0|0|0	20|20|6|5	51	12.75	0	1.21	0.82
PPP1R35-BirAFlag	NP_057736.4	CRNKL1	0|0|2|3|5|4|15|15|0|3|6|7	10|13|4|8	35	8.75	0	0.58	0.92
PPP1R35-BirAFlag	NP_006182.2	PA2G4	34|28|45|39|47|42|38|34|34|31|28|33	33|35|22|21	111	27.75	0	0.6	0.94
PPP1R35-BirAFlag	NP_001075019.1	THOC2	11|17|36|39|28|28|60|54|22|37|48|47	12|17|20|20	69	17.25	0	0.3	0.94
PPP1R35-BirAFlag	NP_075060.1	CENPH	0|0|0|0|0|0|5|5|0|0|4|0	5|6|0|0	11	2.75	0	0.55	0.83
PPP1R35-BirAFlag	NP_006074.2	IK	0|3|4|5|8|11|38|44|14|11|27|25	24|25|5|8	62	15.5	0	0.38	0.94
PPP1R35-BirAFlag	NP_066545.3	GINS1	0|0|0|0|0|0|2|2|8|5|5|4	7|6|0|0	13	3.25	0	0.5	0.86
PPP1R35-BirAFlag	NP_997251.2	FAM195B	2|2|3|6|9|8|7|9|0|0|0|0	6|6|4|4	20	5	0	0.56	0.9
PPP1R35-BirAFlag	NP_065907.2	TSHZ3	0|0|0|0|0|0|0|0|0|0|0|0	2|4|0|0	6	1.5	0.43	15	0.36
PPP1R35-BirAFlag	NP_076424.1	DDRGK1	0|0|5|0|2|2|6|7|0|5|6|7	4|5|0|2	11	2.75	0	0.39	0.88
PPP1R35-BirAFlag	NP_061973.1	DMAP1	0|0|0|0|0|0|6|12|0|2|4|2	6|5|2|2	15	3.75	0	0.42	0.9
PPP1R35-BirAFlag	NP_004955.2	HDAC1	0|3|21|20|21|12|0|14|11|8|17|21	24|29|48|43	144	36	0	1.71	0.81
PPP1R35-BirAFlag	NP_076943.1	C19orf43	5|6|5|5|12|10|36|37|12|12|10|10	21|18|6|5	50	12.5	0	0.34	0.94
PPP1R35-BirAFlag	NP_076958.1	CENPM	0|0|0|0|0|0|0|0|0|0|0|0	3|3|2|0	8	2	0.66	20	0.14
PPP1R35-BirAFlag	NP_076970.1	PDCL3	0|0|2|0|0|0|6|3|0|3|5|9	5|7|6|4	22	5.5	0	0.73	0.88
PPP1R35-BirAFlag	NP_077007.1	WDR77	0|3|10|9|15|18|13|17|3|6|10|13	14|17|10|12	53	13.25	0	0.76	0.92
PPP1R35-BirAFlag	NP_077018.1	C11orf49	21|24|33|33|35|37|15|15|12|14|23|23	22|21|25|24	92	23	0	0.64	0.94
PPP1R35-BirAFlag	NP_077295.1	C1orf35	0|2|0|0|7|4|11|9|6|4|4|4	3|4|0|0	7	1.75	0	0.17	0.94
PPP1R35-BirAFlag	NP_055456.2	MDC1	18|25|55|46|45|52|140|136|53|57|90|87	11|10|8|6	35	8.75	0	0.06	0.94
PPP1R35-BirAFlag	NP_060587.8	WDR11	17|9|27|23|39|36|43|41|13|16|27|31	31|30|32|34	127	31.75	0	0.76	0.94
PPP1R35-BirAFlag	NP_001578.2	OCRL	10|9|13|12|4|7|24|27|14|19|10|15	19|18|14|11	62	15.5	0	0.61	0.93
PPP1R35-BirAFlag	NP_079120.1	NUP85	5|5|7|4|2|3|6|7|5|6|6|7	10|6|5|3	24	6	0	0.86	0.84
PPP1R35-BirAFlag	NP_079222.1	FAM192A	0|4|0|0|4|4|16|16|7|0|6|0	8|8|0|0	16	4	0	0.25	0.93
PPP1R35-BirAFlag	NP_079479.1	C2orf44	0|0|0|0|0|0|0|0|0|0|0|0	4|2|9|6	21	5.25	0.93	52.5	0.01
PPP1R35-BirAFlag	NP_002731.4	PRKCI	0|0|0|3|0|0|4|5|0|0|4|0	5|5|0|0	10	2.5	0	0.56	0.82
PPP1R35-BirAFlag	NP_006188.3	PCM1	16|21|36|40|88|86|42|33|15|19|21|23	56|54|64|63	237	59.25	0	0.68	0.94
PPP1R35-BirAFlag	NP_004389.2	DDX10	5|11|8|7|5|12|57|66|31|31|29|30	16|14|15|9	54	13.5	0	0.22	0.94
PPP1R35-BirAFlag	NP_110421.1	TDRD3	0|0|3|4|5|5|21|21|9|6|6|8	26|31|10|13	80	20	0	0.95	0.91
PPP1R35-BirAFlag	NP_004514.2	KIF11	11|10|23|26|26|29|25|23|6|0|15|13	6|9|4|7	26	6.5	0	0.24	0.94
PPP1R35-BirAFlag	NP_112577.1	SF3B5	4|2|3|3|4|6|9|9|5|11|8|8	12|10|7|8	37	9.25	0	0.93	0.89
PPP1R35-BirAFlag	NP_112589.1	CDCA3	0|0|0|0|0|0|9|5|0|3|4|5	3|3|0|0	6	1.5	0	0.21	0.9
PPP1R35-BirAFlag	NP_000982.2	RPL28	0|9|0|9|13|14|15|16|0|0|9|0	18|18|0|10	46	11.5	0	0.74	0.91
PPP1R35-BirAFlag	NP_066272.1	PDLIM1	26|28|41|41|26|24|49|49|64|62|82|88	18|18|18|15	69	17.25	0	0.2	0.94
PPP1R35-BirAFlag	NP_056060.2	ANKS1A	11|8|22|15|28|32|47|44|28|33|28|36	20|25|15|16	76	19	0	0.42	0.94
PPP1R35-BirAFlag	NP_004981.2	MARS	19|29|33|40|31|35|28|24|17|21|29|28	26|20|20|20	86	21.5	0	0.57	0.94
PPP1R35-BirAFlag	NP_004272.2	BAG3	0|0|0|0|9|6|4|8|6|0|5|4	7|0|0|0	7	1.75	0	0.21	0.89
PPP1R35-BirAFlag	NP_115984.3	PPP1R9B	0|0|0|0|0|0|2|0|0|0|0|0	4|3|0|2	9	2.25	0.08	2.25	0.63
PPP1R35-BirAFlag	NP_005890.2	NBR1	0|0|0|0|0|0|0|0|0|0|0|0	19|27|0|0	46	11.5	0.5	115	0.2
PPP1R35-BirAFlag	NP_112740.1	HNRPDL	4|6|19|18|21|21|15|12|8|9|16|13	19|16|15|17	67	16.75	0	0.8	0.93
PPP1R35-BirAFlag	NP_002129.2	HNRNPD	10|10|29|25|28|24|25|25|19|20|33|27	31|26|25|23	105	26.25	0	0.85	0.93
PPP1R35-BirAFlag	NP_005959.2	HNRNPM	33|36|63|63|93|84|89|92|38|37|64|66	101|98|49|45	293	73.25	0	0.79	0.94
PPP1R35-BirAFlag	NP_036339.1	HNRNPH3	0|0|0|0|0|0|5|5|0|0|0|0	2|4|0|0	6	1.5	0	0.3	0.85
PPP1R35-BirAFlag	NP_004730.2	MTA2	9|4|9|7|16|16|33|34|18|15|16|17	28|24|24|19	95	23.75	0	0.71	0.93
PPP1R35-BirAFlag	NP_001004.2	RPS9	26|27|43|40|45|44|30|24|28|23|25|27	40|37|35|38	150	37.5	0	0.84	0.94
PPP1R35-BirAFlag	NP_056050.1	CSTF2T	4|4|0|10|15|12|22|23|7|8|0|11	18|19|4|6	47	11.75	0	0.52	0.93
PPP1R35-BirAFlag	NP_056107.1	ESYT1	26|25|48|57|50|46|44|42|42|42|39|61	28|29|20|17	94	23.5	0	0.4	0.94
PPP1R35-BirAFlag	NP_065174.1	CORO1B	51|50|176|172|70|70|94|85|121|114|219|213	58|57|58|59	232	58	0	0.27	0.94
PPP1R35-BirAFlag	NP_115676.1	TCHP	0|0|0|0|0|0|22|21|7|8|13|12	8|7|5|6	26	6.5	0	0.3	0.93
PPP1R35-BirAFlag	NP_115700.1	NTPCR	0|0|0|0|0|0|0|0|0|0|3|0	4|3|0|0	7	1.75	0.02	1.17	0.67
PPP1R35-BirAFlag	NP_115708.1	WDR83	0|0|0|3|8|5|14|14|5|7|9|9	16|15|9|8	48	12	0	0.86	0.91
PPP1R35-BirAFlag	NP_115712.1	GINS4	0|0|0|0|0|0|0|4|3|0|0|6	6|5|0|0	11	2.75	0	0.55	0.83
PPP1R35-BirAFlag	NP_115721.1	WIBG	0|0|0|3|7|6|6|6|0|0|2|3	2|5|0|0	7	1.75	0	0.27	0.88
PPP1R35-BirAFlag	NP_115722.1	PDCD2L	0|0|0|0|0|0|0|0|0|0|3|2	5|4|6|2	17	4.25	0.01	1.7	0.69
PPP1R35-BirAFlag	NP_112552.1	HNRNPK	38|45|66|67|90|86|217|231|104|108|155|149	133|125|59|61	378	94.5	0	0.42	0.94
PPP1R35-BirAFlag	NP_001010.2	RPS15A	8|12|18|18|25|26|9|10|14|17|12|16	19|23|17|24	83	20.75	0	0.81	0.93
PPP1R35-BirAFlag	NP_066014.1	MOV10	0|0|4|0|0|0|0|0|0|0|0|0	2|2|0|0	4	1	0	0.5	0.75
PPP1R35-BirAFlag	NP_116020.1	HDGFRP2	0|2|3|0|8|7|29|29|9|10|10|9	8|8|0|0	16	4	0	0.14	0.94
PPP1R35-BirAFlag	NP_116026.1	SKP2	0|0|6|2|3|0|0|0|4|9|6|5	4|0|0|0	4	1	0	0.13	0.9
PPP1R35-BirAFlag	NP_116136.1	USMG5	3|3|4|4|5|5|6|5|3|0|0|0	6|7|5|4	22	5.5	0	1	0.83
PPP1R35-BirAFlag	NP_116270.1	LSM10	0|0|0|0|0|0|0|0|0|0|0|0	4|2|0|0	6	1.5	0.43	15	0.36
PPP1R35-BirAFlag	NP_001279.2	CLIC1	0|0|4|0|0|0|17|16|14|11|10|12	6|5|0|0	11	2.75	0	0.17	0.94
PPP1R35-BirAFlag	NP_055389.3	STRN3	0|0|0|0|4|2|5|4|0|0|0|0	5|8|4|4	21	5.25	0	1.17	0.78
PPP1R35-BirAFlag	NP_005504.2	GTF2E1	0|0|6|7|6|4|21|28|11|16|19|21	7|5|0|0	12	3	0	0.12	0.94
PPP1R35-BirAFlag	NP_775901.3	RTTN	0|0|0|0|0|0|0|0|0|0|0|0	61|47|144|121	373	93.25	1	932.5	0
PPP1R35-BirAFlag	NP_078911.3	NAA35	0|2|2|2|0|2|14|13|10|11|11|4	30|28|31|24	113	28.25	0	2.09	0.77
PPP1R35-BirAFlag	NP_061981.2	SMG9	0|0|3|4|5|6|12|9|6|4|6|6	8|5|0|4	17	4.25	0	0.4	0.91
PPP1R35-BirAFlag	NP_001077433.1	TDRKH	0|0|0|0|0|0|5|4|0|0|0|3	9|9|0|2	20	5	0	1.11	0.75
PPP1R35-BirAFlag	NP_068799.2	ZNF148	2|4|6|8|4|5|38|29|15|20|29|26	9|7|3|2	21	5.25	0	0.16	0.94
PPP1R35-BirAFlag	NP_060597.4	ELAC2	0|4|6|6|3|5|24|21|10|16|13|10	4|2|0|0	6	1.5	0	0.07	0.94
PPP1R35-BirAFlag	NP_073713.2	CTBP2	4|2|6|3|6|6|10|7|5|5|14|10	7|6|0|0	13	3.25	0	0.27	0.92
PPP1R35-BirAFlag	NP_001077430.1	WDR62	4|0|0|3|4|0|5|4|6|6|3|3	4|4|8|4	20	5	0	0.83	0.83
PPP1R35-BirAFlag	NP_075384.3	KRI1	0|0|4|3|3|0|11|14|0|3|3|5	11|12|2|0	25	6.25	0	0.5	0.91
PPP1R35-BirAFlag	NP_006566.2	MAP4K5	3|0|0|4|3|2|21|22|9|8|11|13	17|17|0|0	34	8.5	0	0.4	0.93
PPP1R35-BirAFlag	NP_002686.2	POLR2E	0|2|5|6|0|0|9|11|4|4|7|4	9|12|7|10	38	9.5	0	0.95	0.89
PPP1R35-BirAFlag	NP_006223.2	POLR2H	0|0|0|4|2|0|5|7|3|0|3|4	6|5|3|4	18	4.5	0	0.75	0.86
PPP1R35-BirAFlag	NP_116559.1	RECQL	6|8|12|14|14|12|14|13|11|9|11|11	9|6|4|5	24	6	0	0.43	0.94
PPP1R35-BirAFlag	NP_000960.2	RPL5	21|15|19|20|40|39|37|41|21|26|24|26	35|45|24|23	127	31.75	0	0.78	0.93
PPP1R35-BirAFlag	NP_116780.1	SEC23B	6|3|9|12|0|2|4|0|5|5|7|9	9|8|6|5	28	7	0	0.67	0.9
PPP1R35-BirAFlag	NP_062535.2	YLPM1	4|6|12|14|14|12|71|63|23|28|50|45	10|9|13|11	43	10.75	0	0.16	0.94
PPP1R35-BirAFlag	NP_006653.2	SRCAP	0|0|0|0|0|0|0|0|0|0|0|0	3|0|21|16	40	10	0.74	100	0.08
PPP1R35-BirAFlag	NP_002895.3	RDBP	6|5|18|13|14|10|64|58|21|27|62|52	12|14|2|3	31	7.75	0	0.12	0.94
PPP1R35-BirAFlag	NP_115784.1	BAZ1B	19|20|51|51|58|55|149|141|68|82|93|93	27|26|23|24	100	25	0	0.17	0.94
PPP1R35-BirAFlag	NP_116558.1	POLR2C	0|0|0|0|0|0|6|7|0|0|5|0	8|8|7|0	23	5.75	0	0.88	0.84
PPP1R35-BirAFlag	NP_005633.2	TAF7	2|3|6|8|7|7|31|31|5|6|18|10	31|29|8|11	79	19.75	0	0.64	0.93
PPP1R35-BirAFlag	NP_055816.2	SPEN	0|0|2|0|15|10|24|26|0|0|6|4	11|13|4|5	33	8.25	0	0.33	0.93
PPP1R35-BirAFlag	NP_079498.2	WDR82	8|5|9|9|18|18|24|24|15|14|8|8	12|12|8|8	40	10	0	0.42	0.94
PPP1R35-BirAFlag	NP_001091059.1	RPP38	0|0|0|0|2|0|7|7|2|3|5|5	3|0|0|0	3	0.75	0	0.11	0.9
PPP1R35-BirAFlag	NP_079052.2	PEAK1	0|0|0|0|3|4|8|9|0|0|0|0	6|6|2|5	19	4.75	0	0.56	0.9
PPP1R35-BirAFlag	NP_001091678.1	HNRNPF	8|0|33|31|23|23|37|34|22|27|46|41	34|30|24|19	107	26.75	0	0.61	0.94
PPP1R35-BirAFlag	NP_001914.3	DDB1	3|5|5|5|2|0|3|7|5|7|7|12	11|7|11|11	40	10	0	1.05	0.88
PPP1R35-BirAFlag	NP_004362.2	COPA	9|13|19|17|22|19|20|28|12|11|18|17	17|19|16|23	75	18.75	0	0.75	0.93
PPP1R35-BirAFlag	NP_001091977.1	ZNF207	2|0|3|0|7|7|9|9|4|0|3|3	10|8|0|2	20	5	0	0.56	0.88
PPP1R35-BirAFlag	NP_001091981.1	KIF2A	4|4|0|4|8|5|17|18|8|8|8|11	12|11|6|6	35	8.75	0	0.5	0.92
PPP1R35-BirAFlag	NP_060828.2	ABCF3	0|0|0|3|0|4|4|3|5|3|3|11	2|2|0|0	4	1	0	0.12	0.94
PPP1R35-BirAFlag	NP_001005242.2	PKP2	0|0|2|0|4|3|0|0|0|0|0|0	6|5|6|4	21	5.25	0	1.5	0.75
PPP1R35-BirAFlag	NP_001091995.1	CKAP2	0|0|3|2|3|0|10|13|3|5|5|8	5|4|0|2	11	2.75	0	0.24	0.92
PPP1R35-BirAFlag	NP_689821.3	C1orf55	0|0|0|0|0|0|6|7|0|2|0|0	2|2|0|0	4	1	0	0.15	0.9
PPP1R35-BirAFlag	NP_055929.1	ANKLE2	0|0|0|0|0|2|14|10|2|0|0|2	2|0|0|0	2	0.5	0	0.04	0.94
PPP1R35-BirAFlag	NP_009109.3	STRAP	30|26|46|39|65|55|86|90|46|53|57|64	90|93|62|64	309	77.25	0	0.88	0.94
PPP1R35-BirAFlag	NP_009160.2	PACSIN2	3|2|2|2|0|0|13|11|2|5|7|3	6|6|0|0	12	3	0	0.25	0.92
PPP1R35-BirAFlag	NP_056110.2	SMCHD1	4|4|14|10|12|12|18|13|6|5|19|17	14|15|8|9	46	11.5	0	0.62	0.92
PPP1R35-BirAFlag	NP_003148.2	NEK4	0|0|0|0|3|0|0|0|0|0|0|0	4|6|4|5	19	4.75	0.13	3.17	0.62
PPP1R35-BirAFlag	NP_653304.2	LSM14B	0|0|0|2|4|4|13|17|0|5|5|9	18|16|0|0	34	8.5	0	0.57	0.91
PPP1R35-BirAFlag	NP_542417.2	PRRC2A	13|13|20|22|30|32|32|36|17|16|18|15	35|26|23|21	105	26.25	0	0.77	0.93
PPP1R35-BirAFlag	NP_148982.1	RPS24	13|13|22|23|33|27|31|26|14|12|16|18	16|17|17|14	64	16	0	0.5	0.94
PPP1R35-BirAFlag	NP_004059.2	AP2M1	0|0|12|10|13|10|18|20|5|6|14|9	9|4|8|6	27	6.75	0	0.36	0.94
PPP1R35-BirAFlag	NP_037450.2	PRRC2B	0|0|0|2|2|3|3|5|0|0|0|0	17|16|8|8	49	12.25	0.5	3.06	0.29
PPP1R35-BirAFlag	NP_056117.1	HAUS5	10|15|11|9|20|19|10|9|7|6|10|10	20|16|31|34	101	25.25	0	1.29	0.89
PPP1R35-BirAFlag	NP_003125.3	SRP14	6|0|7|11|12|13|6|5|6|0|11|0	7|9|8|0	24	6	0	0.48	0.91
PPP1R35-BirAFlag	NP_004697.2	ARHGEF1	0|0|0|0|0|0|0|0|0|0|0|0	2|0|0|0	2	0.5	0.19	5	0.55
PPP1R35-BirAFlag	NP_004714.2	ARHGEF2	0|3|3|7|6|8|5|3|0|0|4|0	5|6|0|0	11	2.75	0	0.37	0.89
PPP1R35-BirAFlag	NP_003461.2	USP7	8|10|26|25|35|41|50|48|18|14|22|26	41|40|28|30	139	34.75	0	0.71	0.94
PPP1R35-BirAFlag	NP_003165.2	SVIL	0|0|4|3|5|3|20|19|0|0|0|4	5|4|0|0	9	2.25	0	0.12	0.93
PPP1R35-BirAFlag	NP_004482.4	ARHGAP35	3|5|11|3|5|5|21|17|10|12|18|18	13|15|13|12	53	13.25	0	0.68	0.93
PPP1R35-BirAFlag	NP_060697.4	UBA6	0|0|0|0|0|0|0|0|0|0|0|3	3|0|5|4	12	3	0.06	2	0.64
PPP1R35-BirAFlag	NP_002943.2	RPS2	21|24|35|28|53|47|33|34|28|35|34|27	46|51|34|37	168	42	0	0.84	0.94
PPP1R35-BirAFlag	NP_009207.2	CBX3	3|7|10|8|17|13|41|34|21|17|19|15	26|27|8|8	69	17.25	0	0.46	0.94
PPP1R35-BirAFlag	NP_055746.3	PPP6R1	0|0|0|0|3|2|7|5|0|0|3|2	25|26|20|22	93	23.25	0.98	3.88	0
PPP1R35-BirAFlag	NP_444271.2	RBM33	0|0|0|0|2|2|20|22|6|6|13|10	11|13|2|0	26	6.5	0	0.31	0.93
PPP1R35-BirAFlag	NP_065974.1	ZDBF2	0|0|0|0|2|0|5|4|3|2|0|2	3|5|0|2	10	2.5	0	0.56	0.83
PPP1R35-BirAFlag	NP_067064.2	WIZ	0|0|0|0|0|0|10|11|4|5|7|4	7|12|0|0	19	4.75	0	0.45	0.89
PPP1R35-BirAFlag	NP_060362.3	PRPF40A	3|2|13|12|9|9|21|28|14|13|14|18	12|8|5|7	32	8	0	0.33	0.94
PPP1R35-BirAFlag	NP_002878.2	RARS	38|37|82|67|84|83|88|79|46|62|82|74	51|47|30|38	166	41.5	0	0.48	0.94
PPP1R35-BirAFlag	NP_060149.3	BCAS3	3|2|6|0|4|3|8|8|5|11|13|11	6|6|7|4	23	5.75	0	0.48	0.92
PPP1R35-BirAFlag	NP_060585.2	SDAD1	0|0|0|0|0|0|7|7|5|4|6|6	3|3|0|0	6	1.5	0	0.21	0.9
PPP1R35-BirAFlag	NP_005828.2	POP7	0|0|0|0|0|0|0|0|0|0|0|0	5|5|0|2	12	3	0.68	30	0.12
PPP1R35-BirAFlag	NP_078838.1	TMCO7	5|10|15|11|21|17|10|8|6|0|6|9	13|10|11|5	39	9.75	0	0.51	0.93
PPP1R35-BirAFlag	NP_001093392.1	ALG13	0|0|0|0|2|2|0|0|2|0|0|0	2|7|0|0	9	2.25	0.09	1.12	0.63
PPP1R35-BirAFlag	NP_057336.3	BIRC6	0|0|4|4|0|2|0|0|0|0|0|0	5|3|25|25	58	14.5	0.5	3.62	0.19
PPP1R35-BirAFlag	NP_116259.2	PNISR	4|4|4|4|7|9|21|23|8|8|8|6	4|4|0|0	8	2	0	0.09	0.94
PPP1R35-BirAFlag	NP_009035.3	RPL10A	10|10|18|22|11|10|6|5|9|12|22|20	2|4|13|13	32	8	0	0.36	0.93
PPP1R35-BirAFlag	NP_000962.2	RPL7	16|16|35|25|38|40|29|31|20|19|26|31	53|49|21|23	146	36.5	0	0.94	0.93
PPP1R35-BirAFlag	NP_000652.2	RPL9	18|18|21|17|45|40|31|29|30|38|30|33	54|45|29|20	148	37	0	0.87	0.93
PPP1R35-BirAFlag	NP_150644.1	RPL8	12|8|15|10|7|9|5|4|14|10|4|7	4|6|13|15	38	9.5	0	0.66	0.91
PPP1R35-BirAFlag	NP_003676.2	KHSRP	8|12|19|14|26|22|67|64|31|31|27|30	44|39|13|13	109	27.25	0	0.42	0.94
PPP1R35-BirAFlag	NP_055619.2	KIAA0753	0|0|0|0|0|0|0|0|0|0|0|0	3|5|7|4	19	4.75	0.98	47.5	0
PPP1R35-BirAFlag	NP_055418.2	CDR2L	0|0|0|0|0|0|0|5|0|2|0|0	5|6|0|0	11	2.75	0	0.79	0.76
PPP1R35-BirAFlag	NP_001093896.1	RAP1GDS1	0|0|0|0|0|0|0|0|0|0|0|0	2|0|0|0	2	0.5	0.19	5	0.55
PPP1R35-BirAFlag	NP_219482.1	ZNF622	0|0|2|2|4|3|5|2|0|0|3|0	10|10|2|4	26	6.5	0	1.44	0.72
PPP1R35-BirAFlag	NP_057376.2	TRAP1	16|16|32|30|50|44|25|25|21|20|23|28	57|59|30|27	173	43.25	0	0.92	0.94
PPP1R35-BirAFlag	NP_002087.2	GTF2F1	3|0|13|14|22|23|55|52|24|21|31|26	28|22|11|7	68	17	0	0.32	0.94
PPP1R35-BirAFlag	NP_036336.2	GTF3C4	0|4|16|11|9|10|20|19|17|15|23|20	21|18|12|7	58	14.5	0	0.67	0.93
PPP1R35-BirAFlag	NP_079351.2	THOC7	0|0|0|0|0|0|13|12|0|0|2|5	12|12|3|2	29	7.25	0	0.58	0.91
PPP1R35-BirAFlag	NP_001095896.1	TBC1D8	0|0|0|2|0|0|0|0|0|0|0|0	4|9|3|5	21	5.25	0.37	5.25	0.39
PPP1R35-BirAFlag	NP_110386.2	NRBF2	0|0|8|0|10|11|9|9|11|6|11|14	7|7|0|0	14	3.5	0	0.28	0.94
PPP1R35-BirAFlag	NP_001609.2	PARP1	45|44|78|74|113|106|135|133|55|52|70|79	90|89|60|62	301	75.25	0	0.56	0.94
PPP1R35-BirAFlag	NP_006169.2	NSF	6|8|9|9|6|7|12|9|7|8|8|10	5|5|0|2	12	3	0	0.27	0.94
PPP1R35-BirAFlag	NP_002682.2	POLD1	0|2|5|2|0|0|11|8|11|12|7|10	16|20|9|7	52	13	0	1.13	0.86
PPP1R35-BirAFlag	NP_004614.3	TTC4	0|0|0|0|0|0|2|0|0|0|0|2	7|5|0|4	16	4	0.1	2	0.63
PPP1R35-BirAFlag	NP_000261.2	PNP	7|8|14|11|4|0|41|38|31|32|47|44	10|10|2|0	22	5.5	0	0.12	0.94
PPP1R35-BirAFlag	NP_942147.3	PHLDB3	0|0|0|0|0|0|0|0|0|0|0|0	5|7|0|0	12	3	0.5	30	0.24
PPP1R35-BirAFlag	NP_005246.2	GAK	0|0|6|7|5|3|5|6|0|2|0|7	7|5|7|6	25	6.25	0	0.89	0.87
PPP1R35-BirAFlag	NP_060255.3	CCDC99	2|0|8|7|10|10|36|38|11|7|19|16	11|11|5|6	33	8.25	0	0.22	0.94
PPP1R35-BirAFlag	NP_005763.3	RCL1	0|0|2|5|0|0|5|7|4|9|5|4	3|5|2|0	10	2.5	0	0.31	0.9
PPP1R35-BirAFlag	NP_060391.2	NPLOC4	4|3|12|16|13|13|43|43|14|16|20|19	24|22|6|7	59	14.75	0	0.34	0.94
PPP1R35-BirAFlag	NP_002636.2	PIK3C2A	0|0|0|0|0|0|0|4|0|3|3|0	7|8|13|13	41	10.25	0.45	2.93	0.35
PPP1R35-BirAFlag	NP_055335.2	MYBBP1A	13|12|47|41|33|34|58|56|32|28|71|76	21|22|26|24	93	23.25	0	0.32	0.94
PPP1R35-BirAFlag	NP_056473.2	NOC2L	0|0|4|8|0|0|9|9|0|4|11|10	8|8|0|0	16	4	0	0.38	0.9
PPP1R35-BirAFlag	NP_001099040.1	NUDT19	0|0|0|0|0|0|0|0|0|0|0|0	10|7|8|10	35	8.75	1	87.5	0
PPP1R35-BirAFlag	NP_056280.2	GEMIN5	55|51|102|96|146|141|133|139|53|66|80|87	105|119|114|102	440	110	0	0.77	0.94
PPP1R35-BirAFlag	NP_056513.2	GPKOW	3|2|10|11|9|7|24|28|18|15|31|25	4|5|0|0	9	2.25	0	0.08	0.94
PPP1R35-BirAFlag	NP_073572.2	ACBD3	6|5|6|6|9|8|14|14|7|2|8|4	21|21|11|12	65	16.25	0	1.16	0.89
PPP1R35-BirAFlag	NP_036308.1	FBXO4	0|0|0|0|0|0|0|0|0|0|0|0	5|4|0|0	9	2.25	0.5	22.5	0.27
PPP1R35-BirAFlag	NP_001104490.1	SUPT5H	2|0|0|0|6|4|18|20|8|4|2|4	21|18|0|0	39	9.75	0	0.51	0.92
PPP1R35-BirAFlag	NP_418404.1	birA	779|862|2884|3069|1632|1705|2428|2553|2166|2632|5436|5755	2428|2541|4932|5335	15236	3809	0	0.68	0.94
PPP1R35-BirAFlag	NP_055803.2	LIMCH1	0|0|2|4|6|5|20|21|22|10|19|23	5|7|0|2	14	3.5	0	0.16	0.94
PPP1R35-BirAFlag	NP_055263.2	ARHGEF16	0|0|2|2|0|0|11|11|4|6|8|5	3|2|3|0	8	2	0	0.18	0.94
PPP1R35-BirAFlag	NP_001106673.1	NACA	7|6|13|14|18|15|34|33|16|16|18|24	25|26|15|13	79	19.75	0	0.59	0.94
PPP1R35-BirAFlag	NP_443080.1	CCDC97	0|0|0|0|0|0|6|9|0|0|8|6	10|9|0|0	19	4.75	0	0.56	0.87
PPP1R35-BirAFlag	NP_443108.1	NACC1	0|0|7|5|6|6|16|18|10|8|19|18	13|14|17|22	66	16.5	0	0.89	0.92
PPP1R35-BirAFlag	NP_001104792.1	DDX54	10|7|9|9|6|4|2|3|4|0|8|3	9|9|3|3	24	6	0	0.63	0.89
PPP1R35-BirAFlag	NP_620604.2	SMARCA1	7|6|0|0|20|14|38|12|18|17|25|31	16|0|0|0	16	4	0	0.12	0.94
PPP1R35-BirAFlag	NP_060130.3	GATAD2A	0|3|0|0|13|10|22|24|0|3|2|0	11|14|3|4	32	8	0	0.35	0.93
PPP1R35-BirAFlag	NP_004388.2	DDX6	8|12|16|24|21|18|26|26|19|26|26|25	31|30|25|21	107	26.75	0	1.03	0.93
PPP1R35-BirAFlag	NP_065937.1	USP28	0|0|5|6|2|2|21|23|8|7|9|16	3|2|2|0	7	1.75	0	0.08	0.94
PPP1R35-BirAFlag	NP_000959.2	RPL4	37|40|56|70|66|67|43|34|49|50|63|61	53|51|49|61	214	53.5	0	0.78	0.94
PPP1R35-BirAFlag	NP_056268.2	THUMPD3	0|2|4|2|2|3|8|8|7|8|7|7	14|12|7|7	40	10	0	1.25	0.82
PPP1R35-BirAFlag	NP_056393.2	LSM14A	2|4|6|7|8|8|25|31|13|11|14|12	18|22|13|11	64	16	0	0.57	0.93
PPP1R35-BirAFlag	NP_055291.2	PDLIM3	4|6|6|3|2|5|18|18|20|18|14|16	8|8|0|0	16	4	0	0.21	0.94
PPP1R35-BirAFlag	NP_055246.2	KIAA1274	11|10|22|19|12|10|46|43|18|16|30|28	10|9|7|5	31	7.75	0	0.17	0.94
PPP1R35-BirAFlag	NP_001107590.1	C17orf85	0|0|0|2|0|0|12|10|0|2|0|0	4|3|0|0	7	1.75	0	0.16	0.92
PPP1R35-BirAFlag	NP_006507.2	SLC2A1	3|0|8|6|0|0|0|3|3|0|4|0	6|5|2|3	16	4	0	0.57	0.88
PPP1R35-BirAFlag	NP_005110.2	THRAP3	16|22|13|14|32|30|73|85|28|29|32|34	39|35|7|7	88	22	0	0.28	0.94
PPP1R35-BirAFlag	NP_001247.3	CDC27	3|5|10|14|20|16|7|7|7|4|11|9	17|16|33|27	93	23.25	0	1.29	0.88
PPP1R35-BirAFlag	NP_000961.2	RPL6	25|26|50|55|54|48|34|37|23|26|43|27	40|38|38|31	147	36.75	0	0.67	0.94
PPP1R35-BirAFlag	NP_056342.3	TBC1D10B	0|0|0|3|2|0|5|4|0|0|0|0	3|0|0|0	3	0.75	0	0.17	0.85
PPP1R35-BirAFlag	NP_065916.2	DHX36	0|4|8|8|5|4|13|13|12|8|15|20	13|11|5|2	31	7.75	0	0.44	0.92
PPP1R35-BirAFlag	NP_061862.1	RBM27	12|9|17|17|10|15|41|33|22|21|32|25	20|21|21|18	80	20	0	0.54	0.94
PPP1R35-BirAFlag	NP_689647.2	CWF19L2	0|0|0|0|0|3|22|27|5|7|7|9	6|7|0|0	13	3.25	0	0.13	0.94
PPP1R35-BirAFlag	NP_444504.1	GLMN	0|2|7|5|0|0|4|0|0|0|5|0	21|17|19|19	76	19	0.74	3.17	0.07
PPP1R35-BirAFlag	NP_444505.1	RPLP0	10|11|24|24|26|21|16|15|18|21|22|34	21|17|12|11	61	15.25	0	0.51	0.93
PPP1R35-BirAFlag	NP_446464.1	ASS1	4|5|7|7|3|0|0|0|0|0|0|0	5|4|0|0	9	2.25	0	0.32	0.88
PPP1R35-BirAFlag	NP_000245.2	MTR	0|3|4|4|7|7|9|8|6|4|15|8	28|28|23|18	97	24.25	0	2.02	0.76
PPP1R35-BirAFlag	NP_060826.2	C5orf22	0|0|0|0|0|0|0|0|0|0|0|0	2|0|0|0	2	0.5	0.19	5	0.55
PPP1R35-BirAFlag	NP_003002.2	SET	24|22|44|35|36|38|46|51|37|40|79|69	40|44|18|18	120	30	0	0.41	0.94
PPP1R35-BirAFlag	NP_036219.2	GTF3C5	6|9|19|16|15|20|21|25|20|21|23|23	34|34|22|22	112	28	0	1.17	0.92
PPP1R35-BirAFlag	NP_056054.2	AGTPBP1	0|0|8|8|0|0|5|5|4|5|14|9	8|7|18|19	52	13	0	1.13	0.86
PPP1R35-BirAFlag	NP_000975.2	RPL23A	12|13|14|12|27|27|25|24|12|10|13|11	30|25|10|10	75	18.75	0	0.69	0.93
PPP1R35-BirAFlag	NP_036221.2	ABCB10	0|0|0|0|0|0|0|0|0|0|0|0	3|3|0|0	6	1.5	0.47	15	0.34
PPP1R35-BirAFlag	NP_002964.3	ATXN2	3|0|3|8|7|11|16|14|2|5|6|7	18|13|7|9	47	11.75	0	0.78	0.91
PPP1R35-BirAFlag	NP_478070.1	FAM207A	0|0|0|0|0|0|17|19|0|6|4|4	6|8|0|0	14	3.5	0	0.19	0.93
PPP1R35-BirAFlag	NP_001001.2	RPS6	17|18|26|24|27|30|23|18|16|19|24|15	29|28|23|21	101	25.25	0	0.89	0.93
PPP1R35-BirAFlag	NP_001116428.1	DBNL	16|16|37|33|30|24|55|59|32|25|48|40	33|36|7|5	81	20.25	0	0.36	0.94
PPP1R35-BirAFlag	NP_003893.2	FUBP1	7|5|13|15|25|18|25|22|14|12|11|6	22|15|0|0	37	9.25	0	0.37	0.93
PPP1R35-BirAFlag	NP_478126.1	EXOSC6	0|2|4|0|0|2|12|10|0|3|2|4	12|9|11|15	47	11.75	0	1.07	0.88
PPP1R35-BirAFlag	NP_061983.2	ZKSCAN4	0|0|0|0|0|0|3|3|0|0|0|0	3|2|0|0	5	1.25	0	0.42	0.8
PPP1R35-BirAFlag	NP_054722.2	DHX38	0|2|2|0|5|6|23|25|4|3|17|9	14|11|0|3	28	7	0	0.29	0.93
PPP1R35-BirAFlag	NP_056326.2	C20orf4	0|0|6|3|5|5|7|7|0|0|6|6	12|13|7|9	41	10.25	0	1.46	0.79
PPP1R35-BirAFlag	NP_065892.1	OSBPL8	0|0|19|15|9|13|5|4|4|3|4|5	8|9|3|6	26	6.5	0	0.38	0.93
PPP1R35-BirAFlag	NP_110442.1	PDRG1	0|0|0|0|0|0|3|3|0|0|0|0	5|5|3|3	16	4	0	1.33	0.75
PPP1R35-BirAFlag	NP_057733.2	ESF1	3|3|8|10|9|11|48|46|17|20|38|37	27|24|18|12	81	20.25	0	0.43	0.94
PPP1R35-BirAFlag	NP_000973.2	RPL21	9|7|13|17|19|21|0|0|5|4|8|12	12|15|18|14	59	14.75	0	0.74	0.92
PPP1R35-BirAFlag	NP_005774.2	TXNDC9	0|0|4|7|6|7|6|6|10|11|13|11	4|6|4|0	14	3.5	0	0.29	0.94
PPP1R35-BirAFlag	NP_004332.2	CAD	6|9|23|23|21|22|5|4|5|7|10|8	34|31|42|37	144	36	0	1.57	0.9
PPP1R35-BirAFlag	NP_001116855.1	BCOR	0|0|3|3|3|4|13|15|4|4|12|9	27|21|18|19	85	21.25	0	1.52	0.85
PPP1R35-BirAFlag	NP_056018.2	RPRD2	4|6|24|20|19|17|36|42|14|15|32|33	18|18|13|16	65	16.25	0	0.42	0.94
PPP1R35-BirAFlag	NP_542165.1	DDX39B	22|20|40|33|35|34|54|57|45|44|54|53	39|40|29|28	136	34	0	0.61	0.94
PPP1R35-BirAFlag	NP_002902.2	UPF1	0|0|9|9|11|6|19|23|3|4|12|18	44|34|19|19	116	29	0	1.38	0.86
PPP1R35-BirAFlag	NP_542161.1	RNPS1	10|14|19|16|21|24|34|33|16|20|28|27	24|22|24|17	87	21.75	0	0.65	0.94
PPP1R35-BirAFlag	NP_064520.2	WRNIP1	6|3|14|9|19|21|37|31|15|14|20|30	10|12|5|6	33	8.25	0	0.24	0.94
PPP1R35-BirAFlag	NP_057267.2	MRTO4	6|5|3|3|8|6|6|5|7|4|0|3	11|10|4|4	29	7.25	0	0.97	0.84
PPP1R35-BirAFlag	NP_056262.3	CAMSAP1	4|4|18|16|21|29|22|24|12|7|14|21	17|18|18|16	69	17.25	0	0.65	0.93
PPP1R35-BirAFlag	NP_001119575.1	RACGAP1	0|0|0|0|4|2|14|11|4|0|3|0	6|5|0|0	11	2.75	0	0.22	0.92
PPP1R35-BirAFlag	NP_055899.2	MRPS27	0|0|5|0|3|5|0|0|0|0|6|4	3|0|0|0	3	0.75	0	0.14	0.88
PPP1R35-BirAFlag	NP_001119601.1	GINS3	0|0|3|2|0|0|3|3|4|4|11|11	9|7|5|6	27	6.75	0	0.61	0.91
PPP1R35-BirAFlag	NP_001120700.1	CBX1	0|0|0|0|0|0|0|0|14|12|0|0	20|19|7|6	52	13	0	1	0.88
PPP1R35-BirAFlag	NP_006332.3	MAD2L2	0|0|0|0|0|0|0|0|0|0|0|0	7|8|0|0	15	3.75	0.5	37.5	0.22
PPP1R35-BirAFlag	NP_001120793.1	CBX5	0|0|2|0|0|0|0|0|0|0|0|0	4|2|0|0	6	1.5	0.06	1.5	0.64
PPP1R35-BirAFlag	NP_001173.2	ALDH7A1	0|0|4|5|0|0|4|3|0|3|0|2	2|0|0|0	2	0.5	0	0.11	0.86
PPP1R35-BirAFlag	NP_060016.3	C2orf29	0|0|0|0|0|2|0|0|3|0|3|0	4|4|17|9	34	8.5	0.31	2.83	0.41
PPP1R35-BirAFlag	NP_006759.3	BRAP	17|14|18|22|28|30|43|44|29|26|31|35	50|39|30|30	149	37.25	0	0.86	0.94
PPP1R35-BirAFlag	NP_001120792.1	UBAP2L	17|18|75|67|82|71|67|73|36|44|89|104	84|83|136|114	417	104.25	0	1.08	0.94
PPP1R35-BirAFlag	NP_000235.2	MEN1	0|0|0|0|0|0|0|0|0|0|0|0	4|4|0|0	8	2	0.5	20	0.29
PPP1R35-BirAFlag	NP_036387.2	XRN2	5|7|19|15|14|8|27|33|18|25|20|20	25|24|20|16	85	21.25	0	0.71	0.93
PPP1R35-BirAFlag	NP_065890.1	WDR48	0|0|0|0|0|0|2|0|0|0|0|0	3|0|0|0	3	0.75	0.02	0.75	0.67
PPP1R35-BirAFlag	NP_055819.2	EXOSC7	0|0|6|10|6|4|11|12|9|8|10|15	12|12|17|19	60	15	0	1.11	0.89
PPP1R35-BirAFlag	NP_001121132.1	MFN2	0|0|0|0|0|0|0|2|0|0|0|0	2|0|0|0	2	0.5	0.01	0.5	0.7
PPP1R35-BirAFlag	NP_001121188.1	ETFA	0|0|9|6|0|2|0|0|7|4|15|14	18|13|5|9	45	11.25	0	0.78	0.9
PPP1R35-BirAFlag	NP_689929.2	PATL1	0|0|3|4|0|3|4|2|2|0|5|6	9|11|17|15	52	13	0.21	2.36	0.54
PPP1R35-BirAFlag	NP_078907.2	MSANTD2	0|0|0|0|0|0|4|4|0|0|6|6	4|4|4|2	14	3.5	0	0.58	0.87
PPP1R35-BirAFlag	NP_066967.3	PSIP1	6|3|20|15|11|11|33|27|15|11|32|23	8|10|8|7	33	8.25	0	0.25	0.94
PPP1R35-BirAFlag	NP_065941.2	KIAA1524	2|11|12|11|33|29|15|13|10|12|5|5	8|12|15|10	45	11.25	0	0.36	0.94
PPP1R35-BirAFlag	NP_006417.2	DPYSL4	20|26|37|27|30|31|41|45|25|23|27|29	27|25|4|4	60	15	0	0.35	0.94
PPP1R35-BirAFlag	NP_064508.3	TM9SF3	0|0|0|2|0|0|0|3|2|2|0|2	5|5|0|0	10	2.5	0	1	0.72
PPP1R35-BirAFlag	NP_001011713.2	NAA30	3|2|0|0|0|0|7|8|8|6|6|6	28|30|7|5	70	17.5	0.5	2.19	0.24
PPP1R35-BirAFlag	NP_004209.2	RAB11B	3|0|0|5|4|3|2|5|4|7|3|0	11|7|0|0	18	4.5	0	0.75	0.79
PPP1R35-BirAFlag	NP_588616.1	DIS3L	0|0|4|4|8|9|7|8|3|4|4|5	19|22|23|14	78	19.5	0.08	2.29	0.64
PPP1R35-BirAFlag	NP_071349.3	UBE2O	22|16|47|46|50|51|27|21|28|31|34|39	82|66|77|76	301	75.25	0	1.49	0.93
PPP1R35-BirAFlag	NP_001122388.1	TOMM40	3|4|7|9|6|5|12|10|11|11|21|22	30|25|14|17	86	21.5	0	1	0.91
PPP1R35-BirAFlag	NP_056175.3	SKIV2L2	25|24|49|45|65|67|18|22|15|15|25|27	18|20|17|19	74	18.5	0	0.28	0.94
PPP1R35-BirAFlag	NP_001123237.1	NSDHL	0|0|6|3|7|4|17|16|7|8|12|14	10|10|3|2	25	6.25	0	0.38	0.92
PPP1R35-BirAFlag	NP_003625.2	NIPSNAP1	0|0|0|0|0|0|0|0|0|0|0|0	4|4|0|0	8	2	0.5	20	0.29
PPP1R35-BirAFlag	NP_001121089.1	ALDOA	0|0|2|3|0|4|0|0|2|2|0|0	3|3|0|2	8	2	0	0.57	0.81
PPP1R35-BirAFlag	NP_055894.6	TBC1D2B	0|0|0|0|0|0|0|0|0|0|0|0	3|4|0|0	7	1.75	0.48	17.5	0.32
PPP1R35-BirAFlag	NP_002637.3	PIK3C2B	0|0|0|0|0|0|8|9|5|3|4|3	3|6|3|3	15	3.75	0	0.44	0.9
PPP1R35-BirAFlag	NP_060117.3	FTSJ3	10|11|29|31|23|24|55|52|27|34|63|59	24|26|20|26	96	24	0	0.39	0.94
PPP1R35-BirAFlag	NP_003615.2	RANBP3	18|24|31|36|40|40|108|97|49|53|57|58	68|68|36|37	209	52.25	0	0.51	0.94
PPP1R35-BirAFlag	NP_853556.2	RFC5	2|4|4|0|3|2|5|6|6|5|7|5	7|7|3|0	17	4.25	0	0.65	0.86
PPP1R35-BirAFlag	NP_006322.4	EMG1	2|0|9|5|5|3|6|5|5|0|5|4	2|5|0|0	7	1.75	0	0.23	0.89
PPP1R35-BirAFlag	NP_001123912.1	SRP9	0|0|0|0|7|7|8|8|0|0|0|0	9|9|0|0	18	4.5	0	0.56	0.87
PPP1R35-BirAFlag	NP_001123919.1	HAUS2	0|2|4|0|7|7|0|0|2|0|0|2	4|6|5|9	24	6	0	0.86	0.85
PPP1R35-BirAFlag	NP_001123995.1	CSDE1	35|41|65|54|106|112|157|149|74|80|89|86	162|160|99|92	513	128.25	0	0.84	0.94
PPP1R35-BirAFlag	NP_001124150.1	EIF4E	0|5|7|7|9|7|10|7|0|4|6|7	10|7|10|9	36	9	0	0.95	0.89
PPP1R35-BirAFlag	NP_002797.3	PSMC6	5|6|15|12|20|16|4|4|4|4|10|5	4|4|8|6	22	5.5	0	0.31	0.94
PPP1R35-BirAFlag	NP_149351.1	SURF4	0|3|14|13|6|6|0|0|8|4|10|15	14|14|18|15	61	15.25	0	1.05	0.9
PPP1R35-BirAFlag	NP_001124319.1	AIFM1	7|6|4|3|0|0|0|0|10|5|0|5	2|3|3|0	8	2	0	0.24	0.94
PPP1R35-BirAFlag	NP_001124295.1	DNMT1	4|4|11|13|6|6|15|13|5|2|7|14	6|7|14|12	39	9.75	0	0.67	0.91
PPP1R35-BirAFlag	NP_001124313.1	RTCD1	0|0|0|0|0|0|0|0|0|0|2|3	3|3|0|0	6	1.5	0	0.6	0.77
PPP1R35-BirAFlag	NP_055953.3	RTF1	0|2|4|0|5|4|28|30|4|10|5|6	11|11|0|0	22	5.5	0	0.19	0.94
PPP1R35-BirAFlag	NP_001124463.1	HYOU1	0|0|9|7|2|5|0|0|2|2|5|7	5|3|0|0	8	2	0	0.25	0.9
PPP1R35-BirAFlag	NP_001124495.1	PEX5	7|11|15|16|19|22|12|15|3|4|13|7	16|12|13|8	49	12.25	0	0.6	0.93
PPP1R35-BirAFlag	NP_573403.1	ELMO2	0|0|0|0|0|0|0|0|0|0|0|0	3|0|0|0	3	0.75	0.24	7.5	0.49
PPP1R35-BirAFlag	NP_001127835.1	RBM20	0|0|0|0|0|0|5|4|0|0|3|2	3|0|0|0	3	0.75	0	0.17	0.85
PPP1R35-BirAFlag	NP_001127852.1	TBC1D5	0|0|2|0|0|0|0|0|0|0|0|0	3|3|4|4	14	3.5	0.14	3.5	0.62
PPP1R35-BirAFlag	NP_001127909.1	PHLDB2	0|0|0|0|0|0|0|0|0|0|0|0	3|2|2|0	7	1.75	0.61	17.5	0.16
PPP1R35-BirAFlag	NP_001127949.1	PARN	0|0|0|3|2|0|8|7|0|0|4|0	9|9|2|0	20	5	0	0.67	0.86
PPP1R35-BirAFlag	NP_055592.2	URB2	0|0|0|0|0|0|0|3|0|0|0|0	2|3|0|0	5	1.25	0.01	0.83	0.69
PPP1R35-BirAFlag	NP_848591.2	MB21D2	0|0|0|4|0|0|17|12|4|0|9|7	11|6|13|7	37	9.25	0	0.64	0.91
PPP1R35-BirAFlag	NP_001127945.1	KIAA0182	0|0|4|2|4|2|6|7|4|3|8|4	6|6|6|7	25	6.25	0	0.83	0.88
PPP1R35-BirAFlag	NP_060501.3	WDR6	0|0|2|0|2|0|0|0|0|0|2|2	9|7|12|17	45	11.25	0.8	5.62	0.04
PPP1R35-BirAFlag	NP_006444.2	TBL3	2|4|4|6|6|6|9|13|6|8|8|6	6|7|0|3	16	4	0	0.36	0.91
PPP1R35-BirAFlag	NP_055018.2	AP2A1	0|0|9|4|8|9|22|20|9|13|12|14	15|14|7|9	45	11.25	0	0.54	0.93
PPP1R35-BirAFlag	NP_001681.2	ATP6V1A	6|9|23|22|14|17|13|12|13|8|25|28	10|13|16|15	54	13.5	0	0.51	0.93
PPP1R35-BirAFlag	NP_006816.2	CKAP4	3|5|10|9|18|12|9|10|0|2|6|8	8|10|4|7	29	7.25	0	0.48	0.92
PPP1R35-BirAFlag	NP_002256.2	KPNB1	20|17|66|58|41|42|59|44|38|41|80|73	70|68|90|77	305	76.25	0	1	0.94
PPP1R35-BirAFlag	NP_055100.2	EXOSC2	0|0|8|7|13|9|29|31|13|11|17|15	34|32|28|20	114	28.5	0	0.95	0.93
PPP1R35-BirAFlag	NP_057023.2	TRMT6	0|0|0|0|0|2|14|16|0|5|5|4	4|3|0|0	7	1.75	0	0.12	0.93
PPP1R35-BirAFlag	NP_057508.2	LUC7L3	5|5|12|15|13|13|13|10|5|5|12|7	11|11|9|10	41	10.25	0	0.73	0.91
PPP1R35-BirAFlag	NP_064578.2	C11orf30	0|0|6|6|4|5|8|6|6|0|7|9	8|8|8|10	34	8.5	0	1	0.87
PPP1R35-BirAFlag	NP_079010.2	CLMN	6|4|12|9|17|13|10|10|7|5|5|7	17|15|11|9	52	13	0	0.87	0.91
PPP1R35-BirAFlag	NP_079359.2	EDC3	0|0|7|7|0|0|7|7|6|7|12|12	7|8|5|0	20	5	0	0.42	0.91
PPP1R35-BirAFlag	NP_036546.2	RAB3GAP2	3|5|9|6|8|7|15|12|7|8|7|13	9|4|10|12	35	8.75	0	0.62	0.91
PPP1R35-BirAFlag	NP_064519.2	DPYSL5	21|23|41|41|35|33|50|52|28|34|45|43	31|27|14|18	90	22.5	0	0.44	0.94
PPP1R35-BirAFlag	NP_116185.2	SYAP1	11|10|29|29|22|20|43|37|21|21|42|34	13|15|11|13	52	13	0	0.31	0.94
PPP1R35-BirAFlag	NP_612423.1	CCDC101	0|0|0|0|0|0|5|5|0|5|10|18	5|0|4|4	13	3.25	0	0.23	0.92
PPP1R35-BirAFlag	NP_612446.1	GPRASP2	0|0|0|0|0|0|0|0|2|0|0|0	2|0|0|0	2	0.5	0.01	0.5	0.7
PPP1R35-BirAFlag	NP_612451.1	CCDC124	0|6|7|7|3|3|12|9|9|13|23|27	4|5|4|3	16	4	0	0.16	0.94
PPP1R35-BirAFlag	NP_612452.1	HAUS1	3|0|6|2|8|8|0|4|5|2|0|4	7|5|14|15	41	10.25	0	1.28	0.8
PPP1R35-BirAFlag	NP_005723.2	RAD50	6|6|9|10|31|24|4|8|0|0|0|2	10|7|7|4	28	7	0	0.25	0.94
PPP1R35-BirAFlag	NP_000909.2	P4HB	0|0|3|0|4|3|0|0|0|0|4|0	2|2|0|0	4	1	0	0.25	0.85
PPP1R35-BirAFlag	NP_005207.2	DDOST	5|9|23|14|0|2|0|0|7|5|10|12	6|5|2|0	13	3.25	0	0.18	0.94
PPP1R35-BirAFlag	NP_057059.2	TAF9B	4|2|8|8|6|8|25|29|10|12|13|12	11|9|0|0	20	5	0	0.19	0.94
PPP1R35-BirAFlag	NP_079426.2	TARS2	0|0|0|0|0|0|0|0|0|0|0|0	4|6|4|0	14	3.5	0.75	35	0.07
PPP1R35-BirAFlag	NP_003735.3	NUMB	2|0|2|3|9|9|17|14|3|4|4|4	7|6|2|0	15	3.75	0	0.24	0.93
PPP1R35-BirAFlag	NP_001128409.1	FIP1L1	5|6|12|12|16|15|25|27|17|17|20|21	18|20|8|18	64	16	0	0.62	0.93
PPP1R35-BirAFlag	NP_036244.2	TPX2	6|7|12|10|25|25|134|128|62|54|66|65	38|37|6|2	83	20.75	0	0.16	0.94
PPP1R35-BirAFlag	NP_612565.1	KIF23	4|3|12|10|10|13|58|56|9|11|19|18	19|21|5|3	48	12	0	0.21	0.94
PPP1R35-BirAFlag	NP_056325.2	DHRS7B	0|0|6|9|0|2|0|2|4|3|7|9	4|4|4|0	12	3	0	0.33	0.91
PPP1R35-BirAFlag	NP_113676.2	L3MBTL2	0|0|0|0|0|0|0|2|3|0|0|0	23|20|17|14	74	18.5	1	7.4	0
PPP1R35-BirAFlag	NP_003968.2	AIP	0|0|0|0|0|0|0|0|0|0|0|0	8|6|0|0	14	3.5	0.5	35	0.23
PPP1R35-BirAFlag	NP_065875.3	ARHGAP21	2|2|6|4|15|11|5|6|3|0|0|0	6|7|3|3	19	4.75	0	0.37	0.92
PPP1R35-BirAFlag	NP_612114.1	ATRX	0|0|0|5|13|15|20|26|4|4|6|10	10|14|6|5	35	8.75	0	0.38	0.93
PPP1R35-BirAFlag	NP_055781.2	DHX30	4|5|12|13|7|6|0|4|0|3|3|8	9|8|10|9	36	9	0	0.72	0.91
PPP1R35-BirAFlag	NP_005138.3	DNAJA3	5|5|20|17|21|11|0|0|3|5|11|8	12|8|11|9	40	10	0	0.49	0.93
PPP1R35-BirAFlag	NP_001128659.1	AGFG1	2|2|3|5|8|0|18|17|3|7|8|6	8|7|0|0	15	3.75	0	0.21	0.93
PPP1R35-BirAFlag	NP_001128714.1	NDRG1	21|18|28|37|20|17|40|45|38|34|43|36	2|0|0|0	2	0.5	0	0.01	0.94
PPP1R35-BirAFlag	NP_003189.2	TCEB3	0|0|4|5|11|10|26|29|9|7|18|18	18|17|2|4	41	10.25	0	0.37	0.93
PPP1R35-BirAFlag	NP_071896.8	NOC3L	0|0|9|6|3|0|22|25|15|15|17|23	4|2|0|0	6	1.5	0	0.06	0.94
PPP1R35-BirAFlag	NP_001129108.1	PIP5K1A	0|0|0|0|0|0|0|0|0|0|0|0	2|2|0|0	4	1	0.37	10	0.38
PPP1R35-BirAFlag	NP_001129123.1	EIF2AK2	0|0|3|0|0|0|0|0|4|6|3|6	6|6|6|3	21	5.25	0	0.88	0.85
PPP1R35-BirAFlag	NP_001129166.1	VDAC3	8|8|28|26|32|29|26|32|14|16|29|29	41|37|26|27	131	32.75	0	1.02	0.93
PPP1R35-BirAFlag	NP_001129122.1	EEF1E1	3|0|6|8|7|7|0|0|0|0|6|9	5|5|7|5	22	5.5	0	0.65	0.89
PPP1R35-BirAFlag	NP_624311.1	PPIL4	0|3|11|8|8|11|48|48|20|26|26|28	20|17|2|3	42	10.5	0	0.22	0.94
PPP1R35-BirAFlag	NP_001129243.1	RPN2	0|0|37|32|17|15|4|7|13|16|38|37	16|14|16|10	56	14	0	0.37	0.94
PPP1R35-BirAFlag	NP_001129487.1	ANXA2	18|21|36|34|25|22|44|48|45|36|64|77	36|28|13|8	85	21.25	0	0.3	0.94
PPP1R35-BirAFlag	NP_001129512.1	CPSF7	0|2|2|0|4|3|25|24|4|8|10|13	15|20|6|7	48	12	0	0.49	0.93
PPP1R35-BirAFlag	NP_001129628.1	ZNF507	0|0|0|0|0|0|0|2|0|0|0|0	2|3|0|0	5	1.25	0.03	1.25	0.66
PPP1R35-BirAFlag	NP_001129676.1	RCC2	8|9|13|20|30|29|39|34|26|23|34|32	19|21|15|16	71	17.75	0	0.49	0.94
PPP1R35-BirAFlag	NP_001129663.1	KANK2	0|0|0|0|2|0|0|0|0|0|2|0	14|10|18|14	56	14	0.98	7	0
PPP1R35-BirAFlag	NP_060856.2	PCID2	0|0|6|5|3|0|0|2|0|0|10|4	5|3|0|0	8	2	0	0.25	0.9
PPP1R35-BirAFlag	NP_005795.2	DDX39A	23|21|46|42|41|37|39|37|41|35|43|42	51|54|35|41	181	45.25	0	1.02	0.93
PPP1R35-BirAFlag	NP_620307.1	DIABLO	2|0|0|0|0|3|5|0|3|3|0|3	4|0|4|3	11	2.75	0	0.69	0.81
PPP1R35-BirAFlag	NP_065750.1	GATAD2B	0|0|0|3|9|10|8|8|4|6|7|9	7|6|7|12	32	8	0	0.84	0.88
PPP1R35-BirAFlag	NP_060090.2	ILF3	17|14|16|16|23|26|28|27|12|20|19|22	27|33|28|22	110	27.5	0	1	0.93
PPP1R35-BirAFlag	NP_644670.1	EHD4	0|0|3|2|0|0|2|3|0|0|3|0	3|5|0|0	8	2	0	0.67	0.76
PPP1R35-BirAFlag	NP_002958.2	SAFB	0|3|6|9|10|12|22|24|0|0|10|13	8|8|4|0	20	5	0	0.22	0.94
PPP1R35-BirAFlag	NP_003070.3	SMARCE1	0|0|2|2|2|0|12|6|8|0|4|5	6|3|0|0	9	2.25	0	0.23	0.91
PPP1R35-BirAFlag	NP_006006.3	ARID1A	2|0|0|0|5|6|16|16|0|0|0|0	7|5|2|3	17	4.25	0	0.27	0.93
PPP1R35-BirAFlag	NP_644810.1	WDR36	0|2|22|27|3|4|58|58|33|39|44|48	37|33|18|23	111	27.75	0	0.48	0.94
PPP1R35-BirAFlag	NP_056016.1	BOP1	2|0|5|2|0|2|17|20|6|3|8|8	7|9|0|2	18	4.5	0	0.24	0.93
PPP1R35-BirAFlag	NP_631946.1	NAP1L1	26|20|56|79|39|42|45|36|42|34|65|65	97|90|104|100	391	97.75	0	1.36	0.94
PPP1R35-BirAFlag	NP_005021.2	PLK1	0|0|0|0|8|9|14|13|2|3|0|0	12|11|5|0	28	7	0	0.52	0.91
PPP1R35-BirAFlag	NP_071741.2	NCAPG	9|10|24|21|14|12|20|22|11|11|27|33	15|12|9|10	46	11.5	0	0.38	0.94
PPP1R35-BirAFlag	NP_006459.3	POLR3C	0|0|2|0|0|0|5|6|3|0|0|0	6|8|0|5	19	4.75	0	0.86	0.82
PPP1R35-BirAFlag	NP_004172.2	UCHL1	0|0|0|0|0|5|0|0|0|3|0|0	6|5|6|7	24	6	0	1.5	0.77
PPP1R35-BirAFlag	NP_003553.2	SLC25A11	11|10|37|31|27|25|14|16|10|10|16|17	29|30|20|13	92	23	0	0.68	0.93
PPP1R35-BirAFlag	NP_002795.2	PSMC3	5|7|36|38|19|22|15|16|5|12|19|21	13|14|6|8	41	10.25	0	0.28	0.94
PPP1R35-BirAFlag	NP_001960.2	EIF5	18|24|68|70|44|43|75|87|45|54|79|82	53|56|36|47	192	48	0	0.57	0.94
PPP1R35-BirAFlag	NP_002851.2	ALDH18A1	29|33|55|53|40|40|23|26|32|33|43|52	55|56|35|43	189	47.25	0	0.88	0.94
PPP1R35-BirAFlag	NP_055040.2	PPP2R1A	6|9|34|33|4|2|9|12|13|16|40|47	14|18|26|26	84	21	0	0.48	0.94
PPP1R35-BirAFlag	NP_055315.2	HTATSF1	0|0|8|7|7|8|26|33|6|6|12|11	11|7|0|4	22	5.5	0	0.19	0.94
PPP1R35-BirAFlag	NP_056485.2	SENP3	0|2|3|3|10|6|10|10|5|5|7|5	9|6|0|0	15	3.75	0	0.38	0.9
PPP1R35-BirAFlag	NP_061849.2	SLC38A2	0|0|4|4|0|0|0|0|0|0|4|3	3|3|0|0	6	1.5	0	0.38	0.83
PPP1R35-BirAFlag	NP_060555.2	IPO9	5|0|12|15|4|5|5|6|5|5|14|14	28|28|23|22	101	25.25	0	1.74	0.85
PPP1R35-BirAFlag	NP_060495.2	GPATCH1	3|3|17|17|18|19|54|47|19|27|52|43	56|58|54|66	234	58.5	0	1.1	0.94
PPP1R35-BirAFlag	NP_062826.2	METTL3	0|0|0|0|0|0|8|7|3|4|4|4	4|2|0|0	6	1.5	0	0.2	0.9
PPP1R35-BirAFlag	NP_116249.2	LTV1	0|0|0|3|2|0|17|20|13|8|17|17	2|4|7|5	18	4.5	0	0.24	0.94
PPP1R35-BirAFlag	NP_653324.1	ZMAT2	0|0|0|0|0|0|24|17|0|0|20|15	13|17|0|0	30	7.5	0	0.34	0.93
PPP1R35-BirAFlag	NP_004784.2	LONP1	0|0|0|2|0|0|0|0|0|2|8|6	3|4|0|0	7	1.75	0	0.25	0.89
PPP1R35-BirAFlag	NP_001135451.1	TP53BP1	3|3|7|7|14|18|16|22|6|7|14|11	6|4|3|2	15	3.75	0	0.19	0.94
PPP1R35-BirAFlag	NP_055385.3	ARFGAP3	0|0|3|2|0|0|23|26|9|9|4|10	4|6|0|2	12	3	0	0.12	0.94
PPP1R35-BirAFlag	NP_001135766.1	SPG20	9|7|14|14|19|16|8|7|6|5|12|8	11|8|13|13	45	11.25	0	0.64	0.92
PPP1R35-BirAFlag	NP_001135770.1	SQSTM1	0|0|6|11|10|9|0|4|0|0|0|0	19|16|6|7	48	12	0	1.14	0.84
PPP1R35-BirAFlag	NP_001135836.1	ALG5	0|0|2|4|0|0|0|0|0|0|0|0	3|4|0|0	7	1.75	0	0.58	0.78
PPP1R35-BirAFlag	NP_001814.2	CKB	5|4|5|6|4|6|18|21|15|18|34|32	26|23|15|21	85	21.25	0	0.64	0.94
PPP1R35-BirAFlag	NP_644671.1	STAT1	23|14|31|30|49|47|84|81|32|32|44|45	44|40|25|21	130	32.5	0	0.39	0.94
PPP1R35-BirAFlag	NP_653333.1	HNRNPUL1	6|6|5|4|7|4|14|12|16|16|10|14	12|10|3|4	29	7.25	0	0.45	0.92
PPP1R35-BirAFlag	NP_001135970.1	SIRT1	0|0|0|0|0|0|0|0|0|0|0|0	7|6|3|2	18	4.5	0.92	45	0.01
PPP1R35-BirAFlag	NP_003141.2	STAT3	14|16|39|29|38|32|49|48|36|40|42|55	39|39|35|38	151	37.75	0	0.73	0.94
PPP1R35-BirAFlag	NP_061322.2	MATR3	16|19|41|30|33|29|40|37|38|36|48|57	38|31|43|39	151	37.75	0	0.72	0.94
PPP1R35-BirAFlag	NP_055312.2	ZNF638	2|2|8|8|13|20|23|24|5|10|20|17	10|6|2|3	21	5.25	0	0.22	0.94
PPP1R35-BirAFlag	NP_361013.3	LUZP1	7|11|9|5|29|29|29|28|9|9|13|13	19|16|13|13	61	15.25	0	0.53	0.93
PPP1R35-BirAFlag	NP_660309.1	NUDCD2	0|0|0|0|0|0|4|0|0|0|0|0	17|18|0|0	35	8.75	0.43	4.38	0.37
PPP1R35-BirAFlag	NP_653171.1	HN1L	15|19|21|20|30|28|32|39|30|21|27|29	30|27|6|13	76	19	0	0.54	0.94
PPP1R35-BirAFlag	NP_004238.3	EFTUD2	25|27|64|52|57|61|59|61|41|48|71|71	57|50|66|69	242	60.5	0	0.85	0.94
PPP1R35-BirAFlag	NP_056067.2	EHBP1	0|4|10|9|11|9|17|16|7|5|9|12	7|9|13|11	40	10	0	0.61	0.92
PPP1R35-BirAFlag	NP_060726.3	WDR12	2|2|3|3|0|0|10|9|7|5|5|7	4|4|0|0	8	2	0	0.21	0.94
PPP1R35-BirAFlag	NP_006704.3	SUB1	12|9|19|13|13|11|29|30|29|26|21|18	20|21|7|5	53	13.25	0	0.45	0.93
PPP1R35-BirAFlag	NP_056065.1	BICD2	0|0|0|5|2|4|0|2|0|0|0|0	4|3|4|2	13	3.25	0	0.72	0.83
PPP1R35-BirAFlag	NP_071394.2	CLSPN	0|0|0|0|0|0|2|4|0|0|0|0	3|0|0|0	3	0.75	0	0.25	0.8
PPP1R35-BirAFlag	NP_001137251.1	IFT81	0|0|0|0|0|0|5|7|0|0|2|0	5|4|4|3	16	4	0	0.67	0.87
PPP1R35-BirAFlag	NP_036421.2	KEAP1	24|27|42|42|86|87|20|21|0|5|9|3	47|47|43|38	175	43.75	0	0.51	0.94
PPP1R35-BirAFlag	NP_057715.2	GCFC1	5|5|16|16|8|7|19|16|7|3|21|13	4|3|19|19	45	11.25	0	0.56	0.92
PPP1R35-BirAFlag	NP_056444.3	PRPF31	0|3|5|5|2|0|12|13|15|10|23|20	13|11|4|4	32	8	0	0.37	0.93
PPP1R35-BirAFlag	NP_001138238.1	DNAJC7	0|3|4|7|0|2|5|4|2|6|5|5	11|7|3|6	27	6.75	0	1.04	0.81
PPP1R35-BirAFlag	NP_006014.2	CDC123	0|0|0|0|5|0|4|6|0|0|0|0	3|6|0|0	9	2.25	0	0.41	0.85
PPP1R35-BirAFlag	NP_001137533.1	COPB1	11|15|38|35|24|24|21|19|25|23|42|48	30|24|34|36	124	31	0	0.69	0.94
PPP1R35-BirAFlag	NP_001138360.1	BAIAP2	2|0|12|9|0|0|12|13|7|4|7|11	5|2|3|3	13	3.25	0	0.26	0.94
PPP1R35-BirAFlag	NP_005947.3	MTHFD1	20|21|37|42|37|36|26|26|19|23|27|29	44|39|21|20	124	31	0	0.78	0.93
PPP1R35-BirAFlag	NP_149107.4	NEK9	7|10|17|19|31|30|10|9|8|8|14|13	15|15|13|12	55	13.75	0	0.45	0.94
PPP1R35-BirAFlag	NP_115766.3	MKI67IP	0|0|7|3|0|4|9|7|5|7|9|6	4|0|0|4	8	2	0	0.22	0.94
PPP1R35-BirAFlag	NP_009197.2	GPN1	0|0|0|0|0|0|4|0|8|0|4|6	10|9|0|2	21	5.25	0	0.75	0.84
PPP1R35-BirAFlag	NP_006280.3	TLN1	54|62|146|142|129|136|139|130|88|85|168|162	80|72|82|86	320	80	0	0.48	0.94
PPP1R35-BirAFlag	NP_060855.2	LSG1	0|5|9|9|7|5|32|27|5|5|15|12	25|23|14|14	76	19	0	0.64	0.93
PPP1R35-BirAFlag	NP_060919.2	UBAP2	9|8|19|22|28|31|30|29|12|13|25|30	35|34|33|28	130	32.5	0	1.07	0.93
PPP1R35-BirAFlag	NP_055994.2	RRP12	2|2|14|17|0|0|9|9|3|5|14|13	2|2|4|0	8	2	0	0.13	0.94
PPP1R35-BirAFlag	NP_068810.3	RELA	0|3|8|7|8|5|6|7|0|0|5|5	5|6|0|0	11	2.75	0	0.34	0.89
PPP1R35-BirAFlag	NP_848927.2	MTDH	5|5|10|13|26|26|59|52|20|15|13|13	15|17|7|4	43	10.75	0	0.19	0.94
PPP1R35-BirAFlag	NP_001138630.1	HBS1L	6|9|15|15|19|17|32|40|18|23|38|32	17|17|5|6	45	11.25	0	0.29	0.94
PPP1R35-BirAFlag	NP_001138678.1	KIAA1671	0|0|5|0|5|2|6|2|2|0|0|2	4|2|3|4	13	3.25	0	0.59	0.86
PPP1R35-BirAFlag	NP_001138680.1	DEPDC1B	3|0|12|8|8|0|20|18|12|14|20|17	7|5|7|7	26	6.5	0	0.33	0.94
PPP1R35-BirAFlag	NP_001138467.1	CCDC85C	4|3|4|2|3|8|6|0|3|0|2|0	19|17|12|8	56	14	0.05	2	0.65
PPP1R35-BirAFlag	NP_001138829.1	SIN3A	0|4|4|4|10|13|19|20|6|4|16|15	13|10|9|11	43	10.75	0	0.55	0.93
PPP1R35-BirAFlag	NP_001138890.1	TTC28	0|2|8|10|25|20|17|14|3|5|9|11	11|9|18|23	61	15.25	0	0.68	0.93
PPP1R35-BirAFlag	NP_055699.2	SUGP2	5|8|19|18|24|28|54|47|14|18|24|27	24|30|29|30	113	28.25	0	0.56	0.94
PPP1R35-BirAFlag	NP_060288.3	WRAP73	0|0|7|4|2|0|7|7|6|13|18|14	16|16|14|9	55	13.75	0	0.86	0.91
PPP1R35-BirAFlag	NP_060596.2	TMEM33	7|8|10|9|8|10|5|4|6|3|3|6	10|8|8|8	34	8.5	0	0.85	0.9
PPP1R35-BirAFlag	NP_001139197.1	LYAR	0|0|4|3|7|8|12|14|0|0|6|5	6|8|0|0	14	3.5	0	0.27	0.92
PPP1R35-BirAFlag	NP_060365.7	DDX27	10|10|12|10|9|13|17|20|16|9|15|17	10|10|5|4	29	7.25	0	0.39	0.94
PPP1R35-BirAFlag	NP_203752.2	TANC1	0|0|0|0|2|0|2|7|0|0|0|0	6|4|5|2	17	4.25	0	0.94	0.8
PPP1R35-BirAFlag	NP_057195.2	TELO2	0|0|3|3|0|0|0|0|0|0|4|0	5|5|12|12	34	8.5	0.35	2.43	0.4
PPP1R35-BirAFlag	NP_001139373.1	SARS2	0|0|0|0|3|4|4|3|3|5|3|2	2|4|0|2	8	2	0	0.44	0.84
PPP1R35-BirAFlag	NP_001139699.1	RPS20	9|8|9|8|7|8|11|7|14|14|12|13	5|6|7|8	26	6.5	0	0.46	0.94
PPP1R35-BirAFlag	NP_005380.2	PCMT1	4|5|14|21|12|9|14|10|23|28|33|29	6|4|5|4	19	4.75	0	0.15	0.94
PPP1R35-BirAFlag	NP_689557.1	LSM12	0|5|7|5|21|24|13|12|6|5|5|7	18|18|6|7	49	12.25	0	0.54	0.93
PPP1R35-BirAFlag	NP_689926.1	STT3A	11|9|16|13|10|12|12|14|6|13|13|17	23|26|14|14	77	19.25	0	1.17	0.9
PPP1R35-BirAFlag	NP_690852.1	LRWD1	6|10|21|24|19|22|59|56|38|45|53|56	25|27|19|19	90	22.5	0	0.39	0.94
PPP1R35-BirAFlag	NP_003091.2	SNX2	19|17|19|18|16|18|23|22|17|11|11|11	26|25|14|12	77	19.25	0	0.86	0.92
PPP1R35-BirAFlag	NP_689413.1	SNX5	0|0|0|0|0|0|9|10|0|5|5|4	8|6|3|0	17	4.25	0	0.45	0.9
PPP1R35-BirAFlag	NP_004583.2	SFSWAP	0|0|0|0|5|0|8|5|0|0|2|0	2|0|0|0	2	0.5	0	0.08	0.9
PPP1R35-BirAFlag	NP_689407.1	CSNK1E	0|0|0|0|0|0|0|0|0|0|0|0	7|0|0|0	7	1.75	0.25	17.5	0.43
PPP1R35-BirAFlag	NP_690042.1	TES	4|6|5|3|7|6|24|22|13|14|21|19	7|9|2|3	21	5.25	0	0.23	0.94
PPP1R35-BirAFlag	NP_690601.1	ARPC2	2|0|0|0|7|0|4|6|0|0|0|0	11|8|0|0	19	4.75	0	0.73	0.81
PPP1R35-BirAFlag	NP_003644.2	COPS3	3|2|8|10|4|4|7|8|0|0|0|8	3|6|9|7	25	6.25	0	0.69	0.89
PPP1R35-BirAFlag	NP_006614.2	PHGDH	10|8|30|25|20|19|17|15|3|6|17|19	21|19|23|21	84	21	0	0.76	0.93
PPP1R35-BirAFlag	NP_689948.1	ZBTB9	5|3|0|0|6|5|6|4|6|4|5|3	8|8|10|8	34	8.5	0	1.42	0.8
PPP1R35-BirAFlag	NP_003130.2	SRPR	5|2|9|8|10|11|9|9|3|2|6|6	9|9|2|3	23	5.75	0	0.55	0.9
PPP1R35-BirAFlag	NP_003309.2	TTK	0|0|8|5|15|15|29|31|4|0|10|13	8|7|11|12	38	9.5	0	0.32	0.94
PPP1R35-BirAFlag	NP_689880.1	NANP	5|10|6|3|3|3|20|22|21|20|17|16	5|10|0|0	15	3.75	0	0.17	0.94
PPP1R35-BirAFlag	NP_006351.2	EIF3M	4|9|23|30|14|8|12|15|11|15|25|30	6|6|19|25	56	14	0	0.47	0.93
PPP1R35-BirAFlag	NP_009142.2	RASSF8	0|0|0|0|3|3|0|2|0|0|0|0	7|6|0|3	16	4	0.01	1.33	0.71
PPP1R35-BirAFlag	NP_001311.3	CSNK2B	4|3|5|5|5|8|17|19|9|9|8|7	10|9|7|0	26	6.5	0	0.36	0.93
PPP1R35-BirAFlag	NP_003325.2	UBA1	7|6|22|20|9|7|39|36|25|33|46|41	35|34|28|23	120	30	0	0.69	0.94
PPP1R35-BirAFlag	NP_006730.2	MCM5	13|14|17|17|18|17|3|4|15|16|22|21	16|10|10|12	48	12	0	0.56	0.93
PPP1R35-BirAFlag	NP_073591.2	SFXN1	7|5|38|36|15|11|25|26|8|8|36|30	31|35|13|17	96	24	0	0.65	0.94
PPP1R35-BirAFlag	NP_001153408.1	EBNA1BP2	0|0|3|3|5|5|12|14|0|0|8|9	3|4|0|0	7	1.75	0	0.13	0.94
PPP1R35-BirAFlag	NP_001153682.1	SLC25A13	15|17|28|26|18|18|11|13|19|16|23|23	26|23|14|9	72	18	0	0.67	0.93
PPP1R35-BirAFlag	NP_113673.3	GRWD1	4|4|10|9|4|3|6|8|8|7|12|15	12|9|12|13	46	11.5	0	0.85	0.91
PPP1R35-BirAFlag	NP_005773.3	ALYREF	9|10|24|19|27|27|24|29|20|26|22|25	29|31|16|14	90	22.5	0	0.8	0.93
PPP1R35-BirAFlag	NP_002909.4	RFX1	0|0|0|3|0|2|2|0|0|0|2|0	5|3|0|0	8	2	0	0.8	0.73
PPP1R35-BirAFlag	NP_705718.1	CAMK1D	0|0|0|0|0|0|10|7|4|3|0|0	2|0|0|0	2	0.5	0	0.06	0.94
PPP1R35-BirAFlag	NP_004642.2	USP11	0|0|0|3|0|0|3|3|0|0|3|0	10|11|5|4	30	7.5	0.31	2.5	0.4
PPP1R35-BirAFlag	NP_004125.3	HSPA9	51|58|97|94|124|133|64|70|58|60|75|71	128|129|64|67	388	97	0	0.75	0.94
PPP1R35-BirAFlag	NP_004506.2	ILF2	9|8|12|15|24|26|26|25|16|18|26|33	19|19|17|22	77	19.25	0	0.65	0.93
PPP1R35-BirAFlag	NP_009211.1	OIP5	0|0|4|0|5|5|9|9|0|0|0|0	2|2|0|0	4	1	0	0.11	0.94
PPP1R35-BirAFlag	NP_055472.1	TTI1	0|0|0|0|0|0|0|0|0|0|0|0	3|2|11|10	26	6.5	0.92	65	0.01
PPP1R35-BirAFlag	NP_055865.1	FTSJD2	5|7|10|12|8|6|32|32|12|12|15|16	4|6|3|0	13	3.25	0	0.1	0.94
PPP1R35-BirAFlag	NP_056281.1	PTPN23	0|2|2|0|3|6|3|4|2|0|0|3	4|3|0|0	7	1.75	0	0.35	0.85
PPP1R35-BirAFlag	NP_056449.1	KIAA1279	0|0|5|0|0|2|0|0|0|0|0|4	20|20|15|9	64	16	0.7	3.56	0.11
PPP1R35-BirAFlag	NP_056464.1	IRF2BP1	0|0|0|0|0|0|0|0|0|0|0|0	2|4|0|0	6	1.5	0.43	15	0.36
PPP1R35-BirAFlag	NP_065883.1	ZNF687	0|0|2|3|2|0|0|3|0|0|0|4	3|0|0|2	5	1.25	0	0.36	0.82
PPP1R35-BirAFlag	NP_067045.1	PRUNE	10|7|26|24|15|18|28|24|17|19|23|28	9|13|8|3	33	8.25	0	0.29	0.94
PPP1R35-BirAFlag	NP_443157.1	LENG8	3|5|11|13|12|14|41|44|15|10|19|18	48|53|16|13	130	32.5	0	0.76	0.93
PPP1R35-BirAFlag	NP_612467.1	WDR92	0|0|0|0|0|0|0|0|0|3|0|3	8|10|7|5	30	7.5	0.15	2.5	0.62
PPP1R35-BirAFlag	NP_005115.2	NUP153	15|17|36|27|44|49|60|51|19|25|33|31	33|25|21|17	96	24	0	0.43	0.94
PPP1R35-BirAFlag	NP_705618.1	NUP155	0|4|18|14|3|3|5|6|9|10|9|11	4|6|7|7	24	6	0	0.38	0.94
PPP1R35-BirAFlag	NP_002793.2	PSMC1	5|7|15|17|10|8|2|0|3|4|9|5	7|5|12|9	33	8.25	0	0.52	0.92
PPP1R35-BirAFlag	NP_694546.1	PSMC4	4|2|12|15|9|8|3|5|5|8|5|11	4|4|6|9	23	5.75	0	0.43	0.92
PPP1R35-BirAFlag	NP_004688.2	PRPF4	13|11|13|14|13|18|28|23|19|15|17|16	18|15|11|11	55	13.75	0	0.54	0.93
PPP1R35-BirAFlag	NP_066997.3	KIAA1967	15|17|16|15|25|27|41|39|19|20|31|24	40|43|33|36	152	38	0	0.95	0.93
PPP1R35-BirAFlag	NP_612510.1	TECR	6|10|6|3|14|13|11|7|6|6|5|3	16|16|5|7	44	11	0	0.81	0.9
PPP1R35-BirAFlag	NP_705931.1	NUP50	8|6|11|13|19|19|26|26|9|10|22|17	15|16|9|7	47	11.75	0	0.45	0.93
PPP1R35-BirAFlag	NP_002523.2	NUP88	0|0|12|9|16|16|17|19|3|9|24|18	34|37|36|31	138	34.5	0	1.6	0.9
PPP1R35-BirAFlag	NP_036478.2	NUP62	3|0|19|17|14|16|17|17|9|0|21|20	36|33|28|29	126	31.5	0	1.54	0.9
PPP1R35-BirAFlag	NP_116253.2	PRPF38A	2|3|0|4|2|2|26|22|11|10|19|13	18|18|12|9	57	14.25	0	0.59	0.93
PPP1R35-BirAFlag	NP_056518.2	RRP7A	0|0|0|0|0|0|2|0|3|0|0|0	2|0|0|0	2	0.5	0	0.2	0.79
PPP1R35-BirAFlag	NP_056156.2	NCAPH	6|6|12|16|15|14|21|19|5|11|12|11	12|11|10|7	40	10	0	0.5	0.94
PPP1R35-BirAFlag	NP_057510.4	GTSE1	0|0|0|0|0|0|12|9|0|0|4|3	4|4|0|0	8	2	0	0.19	0.91
PPP1R35-BirAFlag	NP_053733.2	EWSR1	10|7|7|6|31|33|17|11|4|4|6|7	12|14|4|3	33	8.25	0	0.26	0.94
PPP1R35-BirAFlag	NP_542117.3	SYNRG	2|3|5|2|8|6|8|9|0|0|0|3	4|5|5|3	17	4.25	0	0.5	0.9
PPP1R35-BirAFlag	NP_115518.3	CEP192	0|0|0|0|3|4|2|3|0|0|0|0	7|18|18|18	61	15.25	0.75	4.36	0.05
PPP1R35-BirAFlag	NP_653205.3	ZC3H18	0|0|0|0|5|2|10|9|0|0|0|0	5|8|0|0	13	3.25	0	0.34	0.9
PPP1R35-BirAFlag	NP_001157616.1	CHAMP1	5|6|13|13|17|15|37|36|15|11|24|26	14|14|8|7	43	10.75	0	0.29	0.94
PPP1R35-BirAFlag	NP_005808.3	PLIN3	9|12|12|9|17|17|31|35|21|18|24|29	4|4|4|4	16	4	0	0.12	0.94
PPP1R35-BirAFlag	NP_003578.2	DHX16	0|3|7|5|2|0|34|32|18|12|21|14	8|6|0|0	14	3.5	0	0.11	0.94
PPP1R35-BirAFlag	NP_001074010.2	MGA	0|0|0|0|4|2|14|12|0|0|9|13	16|16|9|9	50	12.5	0	0.93	0.9
PPP1R35-BirAFlag	NP_009135.4	DDX20	0|0|0|0|0|0|0|0|0|0|0|0	2|2|9|6	19	4.75	0.87	47.5	0.02
PPP1R35-BirAFlag	NP_055208.2	STAU2	0|0|0|0|0|0|0|0|0|0|0|0	3|3|0|0	6	1.5	0.47	15	0.34
PPP1R35-BirAFlag	NP_001157945.1	FNBP1L	0|0|0|0|0|0|7|7|0|0|2|3	3|2|0|0	5	1.25	0	0.18	0.9
PPP1R35-BirAFlag	NP_062817.2	EIF4ENIF1	0|0|0|0|9|9|8|9|4|2|2|3	16|20|10|13	59	14.75	0	1.64	0.77
PPP1R35-BirAFlag	NP_064550.3	RAD18	3|3|4|5|5|5|14|14|6|6|4|7	7|10|2|3	22	5.5	0	0.39	0.92
PPP1R35-BirAFlag	NP_002799.3	PSMD2	12|11|33|41|29|28|12|12|11|15|9|11	11|10|23|19	63	15.75	0	0.43	0.94
PPP1R35-BirAFlag	NP_002800.2	PSMD3	13|15|38|34|40|39|33|28|17|14|20|27	40|40|24|18	122	30.5	0	0.77	0.94
PPP1R35-BirAFlag	NP_002705.2	PPP1R10	21|19|72|71|61|68|67|62|46|52|103|103	42|37|71|73	223	55.75	0	0.54	0.94
PPP1R35-BirAFlag	NP_008861.2	SKP1	3|7|11|9|8|9|13|12|8|12|14|16	12|15|10|10	47	11.75	0	0.78	0.91
PPP1R35-BirAFlag	NP_060700.2	NUP133	9|8|18|18|30|34|33|33|18|22|23|24	46|50|52|50	198	49.5	0	1.48	0.92
PPP1R35-BirAFlag	NP_059122.2	NUP54	6|4|4|5|3|4|6|6|3|0|6|0	14|10|11|10	45	11.25	0	1.88	0.73
PPP1R35-BirAFlag	NP_057049.5	NDUFA13	0|0|5|0|0|3|0|0|3|0|5|8	6|5|0|0	11	2.75	0	0.42	0.87
PPP1R35-BirAFlag	NP_001159631.1	NDUFS2	0|0|3|0|0|0|2|0|0|0|0|3	7|5|0|0	12	3	0.01	1	0.72
PPP1R35-BirAFlag	NP_060285.2	HAUS4	3|5|5|6|19|20|9|9|3|2|6|5	17|20|14|12	63	15.75	0	0.81	0.92
PPP1R35-BirAFlag	NP_054740.3	SSX2IP	0|0|0|0|0|0|3|4|0|0|0|0	9|13|10|10	42	10.5	0.32	3	0.4
PPP1R35-BirAFlag	NP_001159932.1	MPP1	3|0|3|3|0|0|15|14|11|8|10|13	7|5|2|0	14	3.5	0	0.24	0.92
PPP1R35-BirAFlag	NP_056261.4	AHCTF1	5|8|14|17|16|11|41|50|17|21|20|24	6|9|16|9	40	10	0	0.22	0.94
PPP1R35-BirAFlag	NP_001161086.1	LEMD3	0|0|10|6|3|4|27|25|13|14|17|16	8|8|10|7	33	8.25	0	0.32	0.94
PPP1R35-BirAFlag	NP_001161093.1	ATXN10	4|4|11|7|0|0|4|5|2|4|8|8	12|13|0|4	29	7.25	0	0.76	0.87
PPP1R35-BirAFlag	NP_001160158.1	PFKM	7|6|10|12|6|4|0|0|4|0|5|5	12|16|6|6	40	10	0	0.91	0.88
PPP1R35-BirAFlag	NP_001981.2	EYA3	0|0|0|0|0|4|4|5|0|0|5|9	3|3|0|0	6	1.5	0	0.21	0.9
PPP1R35-BirAFlag	NP_073739.3	YTHDC2	4|3|15|16|16|17|52|51|18|22|33|29	74|68|81|76	299	74.75	0	1.45	0.93
PPP1R35-BirAFlag	NP_689993.2	MAP7D2	0|0|0|0|6|3|0|0|0|0|0|4	2|2|0|0	4	1	0	0.2	0.87
PPP1R35-BirAFlag	NP_663760.1	ATXN2L	19|20|46|33|92|95|64|65|15|17|22|23	64|68|42|39	213	53.25	0	0.57	0.94
PPP1R35-BirAFlag	NP_054872.2	ZC3H7A	0|0|0|0|0|0|0|0|0|0|0|0	3|5|7|7	22	5.5	0.99	55	0
PPP1R35-BirAFlag	NP_006416.3	SLU7	3|3|6|7|0|5|53|49|11|10|17|19	26|25|4|4	59	14.75	0	0.29	0.94
PPP1R35-BirAFlag	NP_003668.2	DENR	0|0|0|0|0|0|2|0|0|0|0|0	3|0|0|0	3	0.75	0.02	0.75	0.67
PPP1R35-BirAFlag	NP_787050.6	PAN3	0|0|0|0|0|0|0|0|0|0|0|0	5|0|2|0	7	1.75	0.44	17.5	0.36
PPP1R35-BirAFlag	NP_001164409.1	ISYNA1	10|9|16|17|8|9|9|7|9|13|14|12	5|6|0|4	15	3.75	0	0.23	0.94
PPP1R35-BirAFlag	NP_777567.1	PPP4R2	0|4|8|0|7|7|16|13|7|7|0|5	12|12|4|5	33	8.25	0	0.57	0.92
PPP1R35-BirAFlag	NP_783202.1	ARFGAP1	8|16|31|25|24|23|41|39|27|22|31|32	31|25|15|12	83	20.75	0	0.52	0.94
PPP1R35-BirAFlag	NP_787048.1	TXLNA	0|2|0|0|10|7|8|7|3|0|0|0	12|6|0|2	20	5	0	0.56	0.87
PPP1R35-BirAFlag	NP_067026.3	SRPRB	0|0|7|2|6|6|6|8|6|0|6|8	2|4|0|0	6	1.5	0	0.19	0.94
PPP1R35-BirAFlag	NP_115834.1	PHF6	0|0|0|0|4|4|7|5|0|0|0|0	4|4|0|0	8	2	0	0.33	0.87
PPP1R35-BirAFlag	NP_004765.2	MED1	5|10|12|14|10|14|26|30|14|13|26|34	7|6|5|2	20	5	0	0.16	0.94
PPP1R35-BirAFlag	NP_055850.1	ZHX3	2|5|11|8|8|8|23|26|7|6|10|8	12|11|5|2	30	7.5	0	0.31	0.93
PPP1R35-BirAFlag	NP_789782.1	CHMP4B	0|0|5|5|5|0|9|9|13|7|7|17	4|4|0|2	10	2.5	0	0.17	0.94
PPP1R35-BirAFlag	NP_003819.1	MTMR1	0|0|0|0|5|6|12|9|8|4|7|14	16|11|10|4	41	10.25	0	0.79	0.9
PPP1R35-BirAFlag	NP_001165906.1	RAB3GAP1	0|0|0|0|3|2|11|8|4|2|2|4	5|4|0|0	9	2.25	0	0.24	0.91
PPP1R35-BirAFlag	NP_001409.3	EIF4G2	8|9|39|36|49|43|72|72|29|29|46|51	77|73|71|52	273	68.25	0	0.95	0.94
PPP1R35-BirAFlag	NP_001166958.1	NKRF	2|2|3|0|9|11|12|10|0|0|3|0	14|10|3|3	30	7.5	0	0.65	0.89
PPP1R35-BirAFlag	NP_060873.4	DCP1A	6|2|23|13|5|5|11|15|3|7|14|7	16|19|15|14	64	16	0	0.84	0.92
PPP1R35-BirAFlag	NP_006311.2	PGRMC2	6|10|13|14|13|16|44|41|21|23|25|24	12|11|3|0	26	6.5	0	0.15	0.94
PPP1R35-BirAFlag	NP_803172.1	PPFIA1	0|0|0|0|0|0|0|0|0|0|0|0	3|3|0|2	8	2	0.66	20	0.14
PPP1R35-BirAFlag	NP_085124.2	DICER1	6|6|14|8|19|18|27|26|7|10|8|8	15|16|0|7	38	9.5	0	0.36	0.93
PPP1R35-BirAFlag	NP_001518.3	HDAC2	8|15|12|9|17|26|24|24|12|17|15|17	8|10|19|13	50	12.5	0	0.5	0.93
PPP1R35-BirAFlag	NP_001171134.1	RIF1	11|16|37|38|60|54|58|56|25|28|33|39	12|16|13|12	53	13.25	0	0.22	0.94
PPP1R35-BirAFlag	NP_003080.2	SNRNP70	10|9|17|16|29|28|51|48|15|12|14|13	32|37|17|18	104	26	0	0.53	0.94
PPP1R35-BirAFlag	NP_002694.3	PPAT	4|0|0|2|0|0|5|6|0|3|3|3	7|5|0|0	12	3	0	0.55	0.83
PPP1R35-BirAFlag	NP_001171630.1	UGDH	0|0|0|0|0|0|0|0|0|0|0|0	2|0|0|0	2	0.5	0.19	5	0.55
PPP1R35-BirAFlag	NP_001171671.1	ZBTB33	44|46|95|95|138|137|60|63|40|37|65|75	145|148|148|119	560	140	0	1.02	0.94
PPP1R35-BirAFlag	NP_001171712.1	VDAC2	20|19|33|30|34|31|55|58|28|30|32|31	35|38|35|28	136	34	0	0.6	0.94
PPP1R35-BirAFlag	NP_001171753.1	PRMT7	7|9|12|5|5|9|21|19|25|26|26|21	16|13|9|5	43	10.75	0	0.41	0.93
PPP1R35-BirAFlag	NP_001172110.1	PFDN6	5|2|6|6|4|0|13|9|11|8|13|9	22|23|12|10	67	16.75	0	1.29	0.86
PPP1R35-BirAFlag	NP_817092.1	PPM1G	3|4|7|8|5|6|20|21|13|9|13|25	18|21|11|10	60	15	0	0.65	0.93
PPP1R35-BirAFlag	NP_003899.2	EIF2S2	10|8|14|13|11|11|23|21|7|10|12|9	13|11|9|12	45	11.25	0	0.51	0.93
PPP1R35-BirAFlag	NP_115687.2	POLDIP3	0|2|3|0|3|4|20|18|10|12|18|25	7|8|4|3	22	5.5	0	0.24	0.94
PPP1R35-BirAFlag	NP_006787.2	AFG3L2	0|0|7|9|5|3|8|8|3|2|5|6	4|7|2|0	13	3.25	0	0.38	0.89
PPP1R35-BirAFlag	NP_001177893.1	ZMYM2	4|4|0|5|10|11|26|22|7|7|5|7	11|14|8|10	43	10.75	0	0.45	0.93
PPP1R35-BirAFlag	NP_001177916.1	SRSF11	5|5|8|9|17|14|62|52|12|12|16|25	20|22|7|0	49	12.25	0	0.21	0.94
PPP1R35-BirAFlag	NP_835461.1	ZNF598	6|8|13|14|24|20|19|20|6|3|9|5	25|28|13|14	80	20	0	0.91	0.92
PPP1R35-BirAFlag	NP_114432.2	BRIP1	0|2|11|11|13|13|25|28|13|6|17|15	16|13|12|16	57	14.25	0	0.54	0.93
PPP1R35-BirAFlag	NP_005104.2	GOLGA5	4|3|7|9|15|11|11|12|2|2|4|2	6|3|8|5	22	5.5	0	0.41	0.92
PPP1R35-BirAFlag	NP_665739.3	POGZ	0|0|7|2|6|7|16|21|0|0|6|9	14|13|7|5	39	9.75	0	0.53	0.93
PPP1R35-BirAFlag	NP_005780.2	PSME3	18|16|48|40|27|18|72|79|48|49|91|105	54|48|44|45	191	47.75	0	0.49	0.94
PPP1R35-BirAFlag	NP_849193.1	STT3B	0|0|5|3|0|0|0|0|0|0|4|3	4|5|0|0	9	2.25	0	0.5	0.82
PPP1R35-BirAFlag	NP_006297.2	SMC1A	6|9|12|12|28|22|24|25|12|16|8|9	15|15|6|5	41	10.25	0	0.39	0.94
PPP1R35-BirAFlag	NP_112223.1	TRIM56	0|0|2|3|0|0|3|6|0|0|10|0	15|8|9|7	39	9.75	0	1.22	0.81
PPP1R35-BirAFlag	NP_006538.2	IGF2BP3	0|3|23|21|12|10|19|17|8|14|18|16	19|18|13|11	61	15.25	0	0.69	0.93
PPP1R35-BirAFlag	NP_001184033.1	MLL	0|0|5|6|7|7|19|18|3|8|10|8	14|17|7|7	45	11.25	0	0.61	0.92
PPP1R35-BirAFlag	NP_001184226.1	GABPA	0|3|5|4|5|4|6|6|3|5|6|4	14|11|2|0	27	6.75	0	1.12	0.73
PPP1R35-BirAFlag	NP_001185808.1	ATP5J2-PTCD1	0|0|8|10|7|6|9|7|0|0|5|5	9|9|6|4	28	7	0	0.74	0.89
PPP1R35-BirAFlag	NP_001185987.1	C15orf38-AP3S2	9|12|22|21|15|17|42|0|45|39|0|0	16|16|3|3	38	9.5	0	0.22	0.94
PPP1R35-BirAFlag	NP_001186226.1	UIMC1	0|0|0|0|0|0|11|11|0|0|9|6	3|0|0|0	3	0.75	0	0.07	0.94
PPP1R35-BirAFlag	NP_060115.3	HAUS6	13|15|26|23|42|36|24|24|15|15|23|22	49|43|53|35	180	45	0	1.15	0.93
PPP1R35-BirAFlag	NP_078824.2	CEP97	0|0|6|0|2|0|0|0|0|0|0|3	6|4|9|7	26	6.5	0	1.44	0.75
PPP1R35-BirAFlag	NP_852480.1	EXOSC8	2|0|4|0|4|8|9|6|5|5|6|7	10|9|4|5	28	7	0	0.82	0.87
PPP1R35-BirAFlag	NP_055093.2	HSPA4L	0|0|3|0|0|0|10|21|2|5|5|4	17|20|3|4	44	11	0	0.71	0.91
PPP1R35-BirAFlag	NP_060544.2	CCDC94	0|0|0|0|0|0|16|20|8|11|6|9	5|3|0|0	8	2	0	0.11	0.94
PPP1R35-BirAFlag	NP_002147.2	HSPD1	25|20|44|44|26|33|28|25|22|18|24|33	35|30|31|31	127	31.75	0	0.72	0.94
PPP1R35-BirAFlag	NP_115765.2	ARFGAP2	4|2|11|6|7|6|13|12|9|4|8|8	5|4|4|0	13	3.25	0	0.26	0.94
PPP1R35-BirAFlag	NP_852469.1	TCF20	0|0|0|0|0|0|2|0|4|0|2|3	2|0|3|0	5	1.25	0	0.36	0.82
PPP1R35-BirAFlag	NP_071401.3	RBM26	6|6|10|7|16|11|56|57|22|12|16|22	7|7|2|2	18	4.5	0	0.08	0.94
PPP1R35-BirAFlag	NP_036525.1	PFAS	3|0|2|5|3|8|3|3|0|2|4|0	9|7|18|10	44	11	0.06	1.69	0.64
PPP1R35-BirAFlag	NP_001186910.1	NDUFS1	0|0|2|2|0|0|0|0|2|6|7|8	3|4|2|0	9	2.25	0	0.3	0.9
PPP1R35-BirAFlag	NP_056423.2	C10orf137	0|0|0|0|0|0|0|0|0|0|0|0	5|5|12|9	31	7.75	1	77.5	0
PPP1R35-BirAFlag	NP_057030.3	PELO	0|0|4|3|2|0|0|0|0|0|0|0	4|3|0|2	9	2.25	0	0.64	0.8
PPP1R35-BirAFlag	NP_853551.1	RFC4	0|0|15|14|3|0|15|18|19|17|34|21	2|4|9|5	20	5	0	0.18	0.94
PPP1R35-BirAFlag	NP_001188474.1	RBM15	0|0|2|3|0|2|4|6|0|2|0|4	4|3|8|5	20	5	0	1	0.8
PPP1R35-BirAFlag	NP_001189360.1	PRDX1	34|36|54|53|82|77|63|66|58|52|56|49	60|63|39|42	204	51	0	0.64	0.94
PPP1R35-BirAFlag	NP_001189399.1	RPS10-NUDT3	0|0|14|8|0|0|8|6|0|0|22|18	5|0|8|4	17	4.25	0	0.21	0.93
PPP1R35-BirAFlag	NP_149073.1	SARNP	0|2|2|3|2|3|11|10|8|6|4|4	5|7|0|0	12	3	0	0.29	0.91
PPP1R35-BirAFlag	NP_061330.2	BAIAP2L1	0|0|0|2|7|7|8|9|3|0|3|2	6|9|0|2	17	4.25	0	0.5	0.88
PPP1R35-BirAFlag	NP_057297.2	TRIP4	0|3|0|2|0|3|4|3|0|2|3|3	4|0|3|2	9	2.25	0	0.64	0.8
PPP1R35-BirAFlag	NP_001677.2	ATP5B	40|37|77|76|68|66|58|56|54|61|91|80	87|84|59|58	288	72	0	0.84	0.94
PPP1R35-BirAFlag	NP_000293.2	PLOD1	2|0|4|0|0|0|0|3|0|0|0|0	4|4|0|0	8	2	0	0.57	0.79
PPP1R35-BirAFlag	NP_003583.2	CUL1	5|0|0|3|0|0|3|4|5|3|3|0	4|3|0|0	7	1.75	0	0.35	0.85
PPP1R35-BirAFlag	NP_057502.2	NF2	0|0|0|0|0|0|5|0|2|4|5|0	2|0|0|0	2	0.5	0	0.1	0.87
PPP1R35-BirAFlag	NP_001226.2	SERPINH1	10|12|30|26|11|12|9|11|16|17|17|20	16|15|12|12	55	13.75	0	0.49	0.93
PPP1R35-BirAFlag	NP_859531.1	ORC5	0|0|6|6|0|0|8|7|4|4|7|8	7|6|6|5	24	6	0	0.75	0.89
PPP1R35-BirAFlag	NP_001191330.1	XIAP	5|0|18|15|12|14|38|37|25|19|25|32	28|23|26|18	95	23.75	0	0.63	0.94
PPP1R35-BirAFlag	NP_004412.2	DVL1	0|0|0|2|6|4|0|4|5|5|3|6	20|21|17|16	74	18.5	0.59	3.08	0.17
PPP1R35-BirAFlag	NP_006383.2	NOP56	9|10|22|18|15|14|28|25|17|12|27|30	20|20|10|10	60	15	0	0.52	0.93
PPP1R35-BirAFlag	NP_054817.2	PRDX3	4|2|6|6|11|16|17|15|0|5|5|0	5|7|0|0	12	3	0	0.18	0.94
PPP1R35-BirAFlag	NP_036439.2	EPB41L3	79|68|123|131|148|137|211|203|114|113|155|146	77|75|53|56	261	65.25	0	0.32	0.94
PPP1R35-BirAFlag	NP_863654.1	ACOT7	0|0|3|4|2|0|8|7|0|2|3|3	8|6|3|4	21	5.25	0	0.7	0.87
PPP1R35-BirAFlag	NP_001191455.1	SSR4	4|5|6|11|6|10|0|0|6|8|9|8	12|6|0|0	18	4.5	0	0.43	0.89
PPP1R35-BirAFlag	NP_003592.3	SMARCA5	23|27|42|45|86|70|114|90|58|60|69|69	65|48|38|46	197	49.25	0	0.48	0.94
PPP1R35-BirAFlag	NP_001191786.1	TCEB1	0|0|0|0|0|0|12|10|6|0|0|0	6|7|0|3	16	4	0	0.36	0.91
PPP1R35-BirAFlag	NP_065823.1	NUFIP2	19|20|34|31|73|70|76|74|22|26|46|49	62|60|35|35	192	48	0	0.64	0.94
PPP1R35-BirAFlag	NP_872426.1	SKA2	4|2|6|7|8|7|7|8|2|5|5|4	5|5|5|5	20	5	0	0.62	0.94
PPP1R35-BirAFlag	NP_001193420.1	MAVS	5|7|10|14|6|5|8|4|3|7|12|15	3|0|3|4	10	2.5	0	0.17	0.94
PPP1R35-BirAFlag	NP_874364.1	FAM101B	13|11|13|18|16|13|5|7|4|4|8|8	4|4|7|7	22	5.5	0	0.32	0.94
PPP1R35-BirAFlag	NP_003742.2	EIF3B	16|19|29|28|51|52|45|38|18|17|13|15	34|38|13|19	104	26	0	0.5	0.94
PPP1R35-BirAFlag	NP_872590.1	PCNA	0|0|7|8|10|13|7|8|5|3|7|7	17|16|7|6	46	11.5	0	1	0.88
PPP1R35-BirAFlag	NP_001193962.1	RNF40	0|5|2|4|8|4|10|11|3|4|4|6	7|5|4|4	20	5	0	0.48	0.91
PPP1R35-BirAFlag	NP_001193996.1	BZW1	0|0|0|0|0|0|6|6|0|0|0|0	3|2|0|0	5	1.25	0	0.21	0.88
PPP1R35-BirAFlag	NP_001367.2	DYNC1H1	28|31|75|61|44|44|9|12|14|12|30|28	32|27|29|32	120	30	0	0.44	0.94
PPP1R35-BirAFlag	NP_061029.2	KIAA1704	0|0|0|0|0|0|13|10|7|5|7|7	6|4|0|0	10	2.5	0	0.22	0.92
PPP1R35-BirAFlag	NP_002476.2	NBN	2|2|4|6|10|9|18|22|3|5|8|11	7|3|3|0	13	3.25	0	0.16	0.94
PPP1R35-BirAFlag	NP_002678.2	PNN	5|4|11|12|17|11|17|17|10|6|17|18	15|15|18|19	67	16.75	0	0.96	0.92
PPP1R35-BirAFlag	NP_004517.2	MCM2	5|4|2|3|6|5|0|0|5|3|3|2	9|7|0|0	16	4	0	0.73	0.8
PPP1R35-BirAFlag	NP_757386.2	SUGP1	6|8|22|32|21|26|54|51|29|25|36|35	40|45|17|23	125	31.25	0	0.6	0.94
PPP1R35-BirAFlag	NP_002813.3	TWF1	3|3|7|6|6|4|2|0|6|3|9|13	4|3|3|2	12	3	0	0.27	0.94
PPP1R35-BirAFlag	NP_000703.2	BLVRA	4|2|3|3|0|5|8|7|4|8|0|0	9|12|0|5	26	6.5	0	0.81	0.85
PPP1R35-BirAFlag	NP_001229528.1	RBM39	7|7|32|23|17|17|30|30|13|22|27|24	21|18|9|11	59	14.75	0	0.48	0.94
PPP1R35-BirAFlag	NP_060493.3	YEATS2	0|0|4|6|5|7|7|5|0|0|4|2	10|9|11|12	42	10.5	0	1.5	0.81
PPP1R35-BirAFlag	NP_006342.2	TIMM44	0|0|3|0|0|0|2|0|0|0|3|3	2|0|0|0	2	0.5	0	0.17	0.81
PPP1R35-BirAFlag	NP_001229713.1	HLCS	35|28|65|51|78|79|67|69|54|57|62|64	23|26|17|13	79	19.75	0	0.25	0.94
PPP1R35-BirAFlag	NP_001229852.1	EIF3L	2|5|16|16|27|27|17|18|7|6|9|12	13|16|18|12	59	14.75	0	0.55	0.93
PPP1R35-BirAFlag	NP_001229858.1	ANKS3	0|0|0|0|0|0|0|0|0|0|0|0	6|5|0|0	11	2.75	0.5	27.5	0.24
PPP1R35-BirAFlag	NP_001229831.1	AKAP1	4|3|4|6|23|16|23|20|5|6|7|6	14|17|6|4	41	10.25	0	0.45	0.93
PPP1R35-BirAFlag	NP_001229827.1	PPP6R2	0|0|0|0|0|0|4|6|0|2|0|0	5|0|0|5	10	2.5	0	0.5	0.84
PPP1R35-BirAFlag	NP_005076.3	NUP214	25|32|67|70|96|81|62|70|40|38|63|61	141|141|136|140	558	139.5	0	1.58	0.94
PPP1R35-BirAFlag	NP_001229956.1	AKT2	2|0|0|0|0|0|0|0|2|2|0|0	4|4|0|4	12	3	0.01	1.5	0.69
PPP1R35-BirAFlag	NP_001230005.1	E2F3	0|0|0|0|0|0|0|0|0|0|0|0	4|3|0|0	7	1.75	0.48	17.5	0.32
PPP1R35-BirAFlag	NP_057191.2	ZFR	4|3|8|8|10|6|24|26|4|5|11|9	10|8|4|4	26	6.5	0	0.26	0.94
PPP1R35-BirAFlag	NP_059133.1	CPSF2	0|0|6|7|10|8|11|10|4|2|4|8	7|5|8|5	25	6.25	0	0.6	0.91
PPP1R35-BirAFlag	NP_004628.4	RAB7A	5|4|9|10|7|7|13|15|0|4|5|5	9|9|0|0	18	4.5	0	0.32	0.92
PPP1R35-BirAFlag	NP_064632.2	ADCK3	4|3|6|3|4|3|0|0|4|4|2|4	2|0|0|0	2	0.5	0	0.1	0.94
PPP1R35-BirAFlag	NP_003312.3	TUFM	28|31|36|39|65|65|42|39|25|32|36|47	74|73|23|26	196	49	0	0.75	0.94
PPP1R35-BirAFlag	XP_003403527.1	LOC100652741	0|0|0|0|0|3|8|8|6|7|5|5	10|9|0|0	19	4.75	0	0.59	0.87
PPP1R35-BirAFlag	NP_001230154.1	PES1	3|0|4|6|5|5|27|26|10|11|13|14	8|9|0|4	21	5.25	0	0.2	0.94
PPP1R35-BirAFlag	NP_005392.2	PTPN14	0|0|0|0|0|0|0|0|0|0|3|0	3|5|5|3	16	4	0.09	2.67	0.63
PPP1R35-BirAFlag	NP_001230575.1	CD2BP2	0|0|3|0|3|2|5|3|0|2|0|0	4|4|5|4	17	4.25	0	1.06	0.8
PPP1R35-BirAFlag	NP_002258.2	KPNA3	0|0|3|3|0|5|15|15|4|9|6|7	11|10|5|4	30	7.5	0	0.5	0.92
PPP1R35-BirAFlag	NP_056363.2	DST	15|12|21|17|75|82|17|10|8|10|16|11	19|18|23|16	76	19	0	0.24	0.94
PPP1R35-BirAFlag	NP_001193413.2	ATF3	0|0|0|0|0|0|5|4|0|0|0|0	5|4|0|0	9	2.25	0	0.5	0.82
PPP1R35-BirAFlag	NP_919223.1	HNRNPA3	7|9|18|13|26|25|27|31|17|16|12|14	23|20|13|10	66	16.5	0	0.57	0.93
PPP1R35-BirAFlag	NP_001231573.1	CHMP2B	2|2|3|2|0|0|7|4|3|6|5|3	3|5|3|2	13	3.25	0	0.5	0.88
PPP1R35-BirAFlag	NP_001231595.1	STX5	0|0|0|0|0|0|9|9|3|2|0|2	2|3|0|0	5	1.25	0	0.14	0.91
PPP1R35-BirAFlag	NP_062538.5	RNF20	4|0|5|6|8|6|12|11|6|2|4|7	5|6|0|3	14	3.5	0	0.3	0.92
PPP1R35-BirAFlag	NP_055963.2	PASK	0|4|6|8|0|0|8|7|0|3|10|7	9|15|9|0	33	8.25	0	0.92	0.84
PPP1R35-BirAFlag	NP_919268.1	SASS6	0|0|0|0|0|0|3|0|0|0|0|0	4|5|0|0	9	2.25	0.05	1.5	0.65
PPP1R35-BirAFlag	NP_919235.1	UBE2I	5|5|4|5|10|9|0|0|6|0|2|2	11|8|13|17	49	12.25	0	1.29	0.83
PPP1R35-BirAFlag	NP_001240605.1	TBPL1	2|3|0|0|0|0|10|9|0|3|3|4	9|7|0|0	16	4	0	0.42	0.89
PPP1R35-BirAFlag	NP_079330.2	VCPIP1	21|22|43|36|55|52|49|43|29|29|29|32	51|48|27|23	149	37.25	0	0.7	0.94
PPP1R35-BirAFlag	NP_919410.1	FGFR1OP	4|5|9|7|10|10|17|15|9|5|7|13	7|3|0|4	14	3.5	0	0.22	0.94
PPP1R35-BirAFlag	NP_001243390.1	SLC12A2	0|0|0|0|2|0|4|4|0|0|2|0	2|0|0|0	2	0.5	0	0.12	0.85
PPP1R35-BirAFlag	NP_001243461.1	MSTO1	0|0|0|0|2|2|3|4|0|0|0|0	5|0|0|3	8	2	0	0.57	0.78
PPP1R35-BirAFlag	NP_001243595.1	FAM193A	0|0|0|0|0|0|0|0|0|0|0|0	5|3|4|6	18	4.5	0.98	45	0
PPP1R35-BirAFlag	NP_073619.2	MPHOSPH9	0|0|0|0|0|0|0|0|0|0|0|0	2|0|3|5	10	2.5	0.67	25	0.13
PPP1R35-BirAFlag	NP_932076.1	NME7	0|0|0|0|0|2|11|11|3|6|4|4	4|5|2|0	11	2.75	0	0.25	0.92
PPP1R35-BirAFlag	NP_054861.2	NUDT5	14|19|21|22|14|8|35|33|38|41|38|47	9|7|5|5	26	6.5	0	0.15	0.94
PPP1R35-BirAFlag	NP_002287.2	LBR	22|24|25|34|37|39|53|45|29|36|40|50	37|37|18|20	112	28	0	0.54	0.94
PPP1R35-BirAFlag	NP_932343.1	C1orf52	0|0|0|0|0|0|26|15|19|20|22|26	9|8|0|0	17	4.25	0	0.16	0.94
PPP1R35-BirAFlag	NP_001243755.1	PAF1	0|0|0|0|8|9|21|22|7|5|6|10	21|16|11|5	53	13.25	0	0.62	0.93
PPP1R35-BirAFlag	NP_001243804.1	CDCA8	0|0|0|0|0|0|11|13|12|12|9|13	3|4|0|0	7	1.75	0	0.13	0.94
PPP1R35-BirAFlag	NP_056289.2	SAMHD1	0|2|5|8|0|0|10|7|2|0|10|14	2|2|0|0	4	1	0	0.08	0.94
PPP1R35-BirAFlag	NP_066288.2	DEAF1	0|0|0|0|0|0|7|10|2|2|0|3	4|3|0|0	7	1.75	0	0.21	0.9
PPP1R35-BirAFlag	NP_937832.1	COPS8	2|2|0|2|0|3|5|0|5|0|0|0	4|0|0|0	4	1	0	0.2	0.85
PPP1R35-BirAFlag	NP_060082.2	ZCCHC8	17|17|82|66|105|97|12|9|7|4|5|7	11|8|19|18	56	14	0	0.14	0.94
PPP1R35-BirAFlag	NP_001244126.1	CUL3	0|0|2|2|0|0|2|4|0|4|2|0	4|5|2|4	15	3.75	0	0.94	0.8
PPP1R35-BirAFlag	NP_004883.3	SEC22B	5|3|6|4|5|6|11|9|6|6|6|5	6|6|0|0	12	3	0	0.3	0.94
PPP1R35-BirAFlag	NP_075388.2	RSRC2	0|0|0|2|3|0|10|8|0|0|4|2	4|3|0|0	7	1.75	0	0.19	0.91
PPP1R35-BirAFlag	NP_937863.1	SNRPB2	5|5|7|9|14|12|20|24|7|10|9|9	9|7|7|4	27	6.75	0	0.31	0.94
PPP1R35-BirAFlag	NP_006355.2	SEC23A	0|0|7|9|0|0|7|7|6|6|5|9	8|0|0|4	12	3	0	0.33	0.89
PPP1R35-BirAFlag	NP_938148.1	GANAB	0|0|0|0|0|0|0|0|0|0|0|0	3|0|0|0	3	0.75	0.24	7.5	0.49
PPP1R35-BirAFlag	NP_002145.3	HSPA4	12|12|18|28|10|10|31|28|8|6|17|11	33|32|9|7	81	20.25	0	0.69	0.93
PPP1R35-BirAFlag	NP_938405.1	G3BP1	27|35|40|44|87|84|58|54|45|45|37|42	82|68|45|45	240	60	0	0.7	0.94
PPP1R35-BirAFlag	NP_004068.2	CS	6|7|12|14|0|0|0|3|6|5|21|19	5|6|11|8	30	7.5	0	0.38	0.93
PPP1R35-BirAFlag	NP_006764.3	DDX18	4|4|8|8|10|10|32|35|14|17|12|18	15|20|4|6	45	11.25	0	0.34	0.94
PPP1R35-BirAFlag	NP_057688.2	KDM3B	9|10|29|22|33|24|32|30|20|19|42|35	23|25|25|22	95	23.75	0	0.62	0.94
PPP1R35-BirAFlag	NP_001719.2	BSG	2|3|0|4|0|0|5|5|2|3|5|3	5|6|0|0	11	2.75	0	0.55	0.83
PPP1R35-BirAFlag	NP_057213.2	COPS4	3|4|9|7|10|11|8|7|5|3|7|9	5|2|10|8	25	6.25	0	0.6	0.9
PPP1R35-BirAFlag	NP_006582.1	POLD3	2|2|2|4|0|0|13|13|4|7|9|10	3|4|2|0	9	2.25	0	0.17	0.94
PPP1R35-BirAFlag	NP_055848.1	FNBP1	0|0|0|0|4|0|5|8|0|0|0|0	3|6|0|0	9	2.25	0	0.35	0.87
PPP1R35-BirAFlag	NP_003631.2	IKBKAP	4|4|9|6|5|6|5|5|5|6|5|3	15|14|17|14	60	15	0	2	0.75
PPP1R35-BirAFlag	NP_001087.2	ACLY	20|24|43|37|35|31|30|31|21|19|36|37	13|12|12|13	50	12.5	0	0.31	0.94
PPP1R35-BirAFlag	NP_057033.2	GET4	0|0|0|0|0|0|0|0|0|0|0|0	6|4|0|0	10	2.5	0.5	25	0.27
PPP1R35-BirAFlag	NP_003740.2	IRS2	0|0|0|2|0|2|2|0|0|0|0|0	7|4|0|0	11	2.75	0.09	1.38	0.63
PPP1R35-BirAFlag	NP_001248341.1	DCTN2	6|8|14|12|33|30|19|13|10|14|15|13	17|19|12|18	66	16.5	0	0.52	0.94
PPP1R35-BirAFlag	NP_004450.3	BPTF	0|0|5|2|15|16|8|11|4|5|0|2	9|5|3|3	20	5	0	0.32	0.92
PPP1R35-BirAFlag	NP_116126.3	LMNB2	0|0|0|0|0|0|0|2|0|0|6|3	2|2|0|0	4	1	0	0.22	0.86
PPP1R35-BirAFlag	NP_001909.3	DBT	0|0|0|0|46|39|0|0|0|0|0|0	6|4|3|0	13	3.25	0	0.08	0.94
PPP1R35-BirAFlag	NP_055427.2	FAM120A	0|0|0|0|0|0|0|0|2|0|2|2	7|3|9|9	28	7	0.51	3.5	0.18
PPP1R35-BirAFlag	NP_056130.2	LARP1	42|40|85|74|112|103|99|112|45|40|75|74	84|76|92|99	351	87.75	0	0.78	0.94
PPP1R35-BirAFlag	NP_060598.3	TSR1	5|6|18|15|6|8|40|45|34|48|45|45	10|9|12|9	40	10	0	0.22	0.94
PPP1R35-BirAFlag	NP_056036.1	DNMBP	0|0|0|0|2|0|7|6|0|0|4|2	3|3|3|7	16	4	0	0.62	0.86
PPP1R35-BirAFlag	NP_056263.1	DPCD	0|0|3|3|0|0|9|16|4|4|11|9	59|63|57|55	234	58.5	1	4.33	0
PPP1R35-BirAFlag	NP_060682.2	ENAH	4|5|7|12|14|11|15|13|3|2|11|16	11|10|6|8	35	8.75	0	0.56	0.92
PPP1R35-BirAFlag	NP_945327.2	TH1L	0|3|7|4|0|0|0|0|2|6|6|5	21|20|17|14	72	18	0.45	2.77	0.35
PPP1R35-BirAFlag	NP_078805.3	CDC73	4|2|9|10|5|4|39|43|13|18|33|26	14|14|5|3	36	9	0	0.22	0.94
PPP1R35-BirAFlag	NP_001257889.1	NOSIP	0|0|0|2|0|2|16|20|8|13|15|22	3|4|0|0	7	1.75	0	0.08	0.94
PPP1R35-BirAFlag	NP_078930.3	NOL9	0|2|7|9|4|4|9|12|6|9|9|10	8|10|6|11	35	8.75	0	0.8	0.9
PPP1R35-BirAFlag	NP_054733.2	SNRNP200	28|29|81|82|84|70|104|103|51|54|106|112	62|63|78|90	293	73.25	0	0.67	0.94
PPP1R35-BirAFlag	NP_060979.2	LRRC59	10|4|15|19|19|16|13|18|16|14|19|24	11|15|9|11	46	11.5	0	0.53	0.94
PPP1R35-BirAFlag	NP_954657.1	KRT18	14|13|36|29|55|53|17|20|10|7|8|15	21|18|26|23	88	22	0	0.41	0.94
PPP1R35-BirAFlag	NP_073615.2	CEP85	0|0|0|0|0|0|0|0|0|0|0|0	8|14|3|8	33	8.25	0.99	82.5	0
PPP1R35-BirAFlag	NP_115958.2	GLYR1	9|11|14|16|10|5|26|23|28|34|28|31	9|10|6|5	30	7.5	0	0.23	0.94
PPP1R35-BirAFlag	NP_005085.2	SLC27A4	0|0|0|0|0|0|0|0|0|0|0|0	2|4|0|0	6	1.5	0.43	15	0.36
PPP1R35-BirAFlag	NP_003585.3	TTF2	0|0|2|4|11|14|17|19|3|2|6|9	20|18|4|7	49	12.25	0	0.68	0.92
PPP1R35-BirAFlag	NP_036601.2	PRPF6	3|5|7|6|9|8|15|18|3|3|9|6	11|11|4|6	32	8	0	0.48	0.92
PPP1R35-BirAFlag	NP_060395.5	DENND4C	2|6|13|14|14|7|6|6|10|11|20|27	6|7|14|17	44	11	0	0.47	0.93
PPP1R35-BirAFlag	XP_003960226.1	LOC101060541	0|0|0|0|0|3|8|3|0|0|0|0	3|3|0|0	6	1.5	0	0.27	0.87
PPP1R35-BirAFlag	NP_705717.1	TAB1	5|6|6|10|7|10|16|16|7|8|8|7	3|9|5|2	19	4.75	0	0.3	0.92
PPP1R35-BirAFlag	NP_037499.2	ANAPC4	0|3|7|10|2|5|5|7|8|4|8|17	12|11|28|22	73	18.25	0	1.35	0.83
PPP1R35-BirAFlag	NP_004809.2	DDX23	8|7|12|8|24|23|21|19|3|4|7|4	14|13|9|11	47	11.75	0	0.5	0.93
PPP1R35-BirAFlag	NP_055644.2	DDX46	57|54|97|82|132|137|212|221|98|97|113|120	107|106|50|53	316	79	0	0.36	0.94
PPP1R35-BirAFlag	NP_000938.2	PRIM2	0|0|16|9|3|2|17|13|7|8|17|17	3|4|9|4	20	5	0	0.29	0.94
PPP1R35-BirAFlag	NP_079037.3	MOB3B	0|0|0|0|0|0|4|6|4|3|0|0	4|2|0|0	6	1.5	0	0.3	0.85
PPP1R35-BirAFlag	NP_004095.4	FASN	627|687|1626|1560|1526|1580|953|997|833|862|1192|1204	694|675|676|616	2661	665.25	0	0.42	0.94
PPP1R35-BirAFlag	NP_004290.2	ABCB7	0|0|2|0|0|2|0|0|0|0|0|0	2|4|0|0	6	1.5	0	0.75	0.72
PPP1R35-BirAFlag	NP_005751.2	CEBPZ	0|0|0|0|0|0|10|12|5|4|10|11	5|2|0|0	7	1.75	0	0.15	0.92
PPP1R35-BirAFlag	NP_006635.2	HSPH1	16|14|40|45|37|37|63|60|21|16|39|46	61|60|71|67	259	64.75	0	1.05	0.94
PPP1R35-BirAFlag	NP_005889.3	CAPRIN1	6|6|9|2|12|7|5|6|2|3|4|4	7|7|7|4	25	6.25	0	0.6	0.91
PPP1R35-BirAFlag	NP_976035.1	POLR1C	0|0|0|0|0|2|0|3|0|0|5|3	10|9|5|4	28	7	0.01	1.75	0.69
PPP1R35-BirAFlag	NP_060738.2	WDR41	2|3|6|5|6|4|18|16|7|10|11|14	6|7|4|3	20	5	0	0.29	0.94
PPP1R35-BirAFlag	NP_055860.1	WAPAL	8|4|19|13|32|25|52|47|21|21|32|31	6|4|4|4	18	4.5	0	0.09	0.94
PPP1R35-BirAFlag	NP_005446.2	ZRANB2	0|0|0|0|0|0|17|22|0|2|5|3	6|9|0|0	15	3.75	0	0.19	0.93
PPP1R35-BirAFlag	NP_689775.2	CDCA2	0|0|0|2|0|3|23|19|9|6|8|7	9|10|0|0	19	4.75	0	0.23	0.93
PPP1R35-BirAFlag	NP_005086.2	ZMYM4	3|0|0|0|7|6|5|5|2|4|0|5	4|4|4|2	14	3.5	0	0.54	0.88
PPP1R35-BirAFlag	NP_001612.1	AHR	0|0|0|0|0|0|2|0|0|0|0|0	6|7|3|3	19	4.75	0.33	4.75	0.4
PPP1R35-BirAFlag	NP_003896.1	NAE1	0|2|3|5|3|3|26|27|2|7|15|15	10|11|0|0	21	5.25	0	0.2	0.94
PPP1R35-BirAFlag	NP_001649.1	ARF1	12|12|18|17|36|36|50|48|26|24|31|31	48|44|20|19	131	32.75	0	0.67	0.94
PPP1R35-BirAFlag	NP_001651.1	ARF4	3|4|9|10|11|10|14|16|7|9|8|6	20|17|12|8	57	14.25	0	0.95	0.9
PPP1R35-BirAFlag	NP_001653.1	ARF5	6|6|0|0|14|15|27|29|13|14|15|16	27|23|6|7	63	15.75	0	0.56	0.93
PPP1R35-BirAFlag	NP_001654.1	ARF6	5|6|4|5|4|5|7|7|3|5|2|5	6|7|0|2	15	3.75	0	0.54	0.87
PPP1R35-BirAFlag	NP_001168.1	ARL1	0|3|15|16|15|13|6|5|0|6|8|9	16|8|8|9	41	10.25	0	0.66	0.91
PPP1R35-BirAFlag	NP_001203.1	C1QBP	58|64|99|88|76|80|213|229|100|110|112|116	121|127|56|51	355	88.75	0	0.4	0.94
PPP1R35-BirAFlag	NP_001734.1	CALM2	0|5|8|5|0|0|16|14|10|10|13|13	6|8|3|4	21	5.25	0	0.35	0.92
PPP1R35-BirAFlag	NP_001271.1	CIRBP	0|0|4|4|6|4|6|6|5|3|4|8	6|6|0|0	12	3	0	0.43	0.87
PPP1R35-BirAFlag	NP_001818.1	CKS2	0|0|0|0|0|0|0|0|0|0|0|0	3|4|0|0	7	1.75	0.48	17.5	0.32
PPP1R35-BirAFlag	NP_001275.1	AP3S1	0|5|6|4|4|4|10|9|3|3|7|7	16|18|6|6	46	11.5	0	1.21	0.82
PPP1R35-BirAFlag	NP_001284.1	CLNS1A	7|8|10|16|20|17|15|13|16|12|33|32	15|10|3|4	32	8	0	0.25	0.94
PPP1R35-BirAFlag	NP_001887.1	CSNK2A2	4|5|8|10|12|6|20|19|23|30|29|23	20|18|11|12	61	15.25	0	0.52	0.93
PPP1R35-BirAFlag	NP_001312.1	CSRP2	0|0|0|0|9|9|4|5|0|0|0|0	3|4|0|0	7	1.75	0	0.19	0.91
PPP1R35-BirAFlag	NP_003602.1	OFD1	2|0|3|0|8|7|6|5|0|2|4|4	13|9|25|25	72	18	0.49	2.4	0.3
PPP1R35-BirAFlag	NP_003850.1	DPM1	3|4|16|15|7|8|10|7|8|7|7|12	10|11|7|4	32	8	0	0.52	0.92
PPP1R35-BirAFlag	NP_001395.1	EEF1G	16|17|32|31|35|37|36|38|23|25|38|40	24|26|32|27	109	27.25	0	0.7	0.94
PPP1R35-BirAFlag	NP_001952.1	EEF2	24|27|66|57|43|43|112|131|86|98|144|134	51|48|66|54	219	54.75	0	0.39	0.94
PPP1R35-BirAFlag	NP_001405.1	EIF2B1	0|0|6|6|0|0|0|0|0|0|0|0	9|7|0|0	16	4	0	0.67	0.82
PPP1R35-BirAFlag	NP_001406.1	EIF2S3	5|4|6|7|22|19|22|23|8|15|13|12	17|24|11|9	61	15.25	0	0.68	0.92
PPP1R35-BirAFlag	NP_003741.1	EIF3A	9|17|40|30|70|68|49|37|20|25|25|25	27|30|30|33	120	30	0	0.43	0.94
PPP1R35-BirAFlag	NP_003748.1	EIF3I	9|8|13|9|23|24|22|23|8|11|13|13	45|44|12|18	119	29.75	0	1.27	0.89
PPP1R35-BirAFlag	NP_003747.1	EIF3H	0|0|0|0|7|4|0|0|0|0|0|0	4|5|0|0	9	2.25	0	0.41	0.86
PPP1R35-BirAFlag	NP_003745.1	EIF3F	9|8|12|12|22|20|18|16|11|15|18|15	25|23|14|15	77	19.25	0	0.92	0.92
PPP1R35-BirAFlag	NP_001559.1	EIF3E	5|5|30|25|16|14|6|8|3|0|13|17	8|9|14|8	39	9.75	0	0.35	0.94
PPP1R35-BirAFlag	NP_003744.1	EIF3D	4|2|4|5|16|13|32|30|11|8|6|6	15|20|0|0	35	8.75	0	0.28	0.94
PPP1R35-BirAFlag	NP_001976.1	ETFB	0|0|0|2|0|0|5|4|0|0|3|3	9|9|7|8	33	8.25	0	1.83	0.74
PPP1R35-BirAFlag	NP_002005.1	FKBP4	6|3|5|6|0|0|10|9|5|4|0|0	38|35|17|14	104	26	0.5	2.74	0.22
PPP1R35-BirAFlag	NP_001460.1	XRCC6	15|19|57|57|45|45|47|40|27|32|49|45	45|43|21|24	133	33.25	0	0.58	0.94
PPP1R35-BirAFlag	NP_003866.1	GMPS	5|5|10|18|12|11|25|18|19|16|41|36	18|14|14|16	62	15.5	0	0.4	0.94
PPP1R35-BirAFlag	NP_000170.1	MSH6	8|15|17|21|15|15|38|31|25|21|25|23	14|14|11|8	47	11.75	0	0.34	0.94
PPP1R35-BirAFlag	NP_002086.1	GTF2E2	0|3|8|5|5|6|34|40|51|44|66|58	12|13|12|9	46	11.5	0	0.19	0.94
PPP1R35-BirAFlag	NP_000174.1	HADHB	2|0|2|5|6|6|4|5|0|3|4|2	7|10|0|4	21	5.25	0	0.88	0.81
PPP1R35-BirAFlag	NP_003633.1	HAT1	4|4|8|6|8|8|47|39|21|18|25|24	23|21|9|7	60	15	0	0.35	0.94
PPP1R35-BirAFlag	NP_001530.1	DNAJA1	4|4|0|7|17|12|15|12|7|12|13|11	81|85|53|56	275	68.75	1	4.3	0
PPP1R35-BirAFlag	NP_001531.1	HSPB1	0|0|0|0|0|0|0|0|0|0|2|3	5|4|0|0	9	2.25	0	0.9	0.73
PPP1R35-BirAFlag	NP_003595.1	IRS4	41|37|72|64|56|52|28|22|25|14|34|34	77|68|87|78	310	77.5	0	1.14	0.94
PPP1R35-BirAFlag	NP_002257.1	KPNA2	8|5|23|19|11|12|15|15|12|11|17|17	26|27|16|15	84	21	0	1	0.92
PPP1R35-BirAFlag	NP_002349.1	MAD2L1	0|0|2|0|3|0|4|4|0|0|0|0	6|6|0|0	12	3	0	0.75	0.78
PPP1R35-BirAFlag	NP_003917.1	MBD3	0|0|2|5|4|0|8|8|0|9|15|13	6|4|18|14	42	10.5	0	0.75	0.9
PPP1R35-BirAFlag	NP_002457.1	MYBL2	0|0|0|0|0|0|0|2|0|0|0|0	7|6|0|0	13	3.25	0.28	3.25	0.41
PPP1R35-BirAFlag	NP_002477.1	NCBP1	3|2|9|9|2|0|21|22|3|4|14|11	5|3|0|0	8	2	0	0.09	0.94
PPP1R35-BirAFlag	NP_002487.1	NDUFS8	0|0|0|0|0|0|0|0|0|0|2|0	4|0|0|0	4	1	0.05	1	0.65
PPP1R35-BirAFlag	NP_003706.1	USO1	5|7|7|9|15|14|9|6|0|0|0|2	2|2|0|0	4	1	0	0.07	0.94
PPP1R35-BirAFlag	NP_002625.1	PHB	22|23|22|31|22|18|22|22|17|17|21|21	31|32|13|18	94	23.5	0	0.87	0.93
PPP1R35-BirAFlag	NP_002676.1	EXOSC10	8|14|21|19|23|13|113|113|55|55|67|62	37|37|24|12	110	27.5	0	0.24	0.94
PPP1R35-BirAFlag	NP_000929.1	POLR2B	2|2|5|6|4|0|6|8|5|5|12|10	10|9|24|20	63	15.75	0	1.43	0.78
PPP1R35-BirAFlag	NP_002703.1	PPP1R7	0|0|0|0|0|0|2|0|0|2|2|4	2|3|0|2	7	1.75	0	0.58	0.79
PPP1R35-BirAFlag	NP_002706.1	PPP2CA	5|5|5|6|6|7|7|9|11|12|16|11	10|12|14|7	43	10.75	0	0.77	0.91
PPP1R35-BirAFlag	NP_002711.1	PPP4C	0|0|8|6|8|12|20|18|7|10|7|7	18|14|8|6	46	11.5	0	0.61	0.92
PPP1R35-BirAFlag	NP_000937.1	PRIM1	0|0|0|3|0|2|0|0|0|0|0|4	8|6|3|0	17	4.25	0	1.21	0.72
PPP1R35-BirAFlag	NP_002818.1	PTPN1	9|12|18|16|20|21|30|30|14|11|12|15	15|11|0|0	26	6.5	0	0.22	0.94
PPP1R35-BirAFlag	NP_003601.1	RAE1	6|8|9|10|4|5|10|9|6|9|13|13	10|9|12|12	43	10.75	0	0.83	0.91
PPP1R35-BirAFlag	NP_002871.1	RAF1	0|3|0|4|4|6|5|5|0|0|3|3	5|2|3|0	10	2.5	0	0.45	0.86
PPP1R35-BirAFlag	NP_002873.1	RANBP1	10|10|15|10|9|9|16|19|12|14|12|13	13|11|4|6	34	8.5	0	0.49	0.92
PPP1R35-BirAFlag	NP_002874.1	RANGAP1	27|40|87|84|94|87|106|112|85|90|140|142	123|116|143|136	518	129.5	0	0.92	0.94
PPP1R35-BirAFlag	NP_002936.1	RPA1	10|9|16|14|27|20|51|59|26|23|29|29	14|14|5|0	33	8.25	0	0.15	0.94
PPP1R35-BirAFlag	NP_002937.1	RPA2	0|3|5|4|0|4|12|8|8|9|4|6	6|6|0|0	12	3	0	0.29	0.91
PPP1R35-BirAFlag	NP_000967.1	RPL12	11|12|13|14|16|11|17|15|18|21|18|20	16|18|8|10	52	13	0	0.63	0.93
PPP1R35-BirAFlag	NP_000969.1	RPL23	10|14|25|22|22|19|22|22|19|23|25|23	30|31|17|20	98	24.5	0	0.98	0.92
PPP1R35-BirAFlag	NP_000972.1	RPL19	0|5|11|12|13|14|16|17|0|0|14|15	16|16|12|0	44	11	0	0.67	0.92
PPP1R35-BirAFlag	NP_000974.1	RPL22	5|4|6|7|5|0|9|8|3|6|9|7	9|10|5|4	28	7	0	0.78	0.88
PPP1R35-BirAFlag	NP_000977.1	RPL24	12|14|22|23|24|24|22|23|11|16|13|10	30|29|17|15	91	22.75	0	0.95	0.92
PPP1R35-BirAFlag	NP_000978.1	RPL26	9|9|8|10|15|17|14|13|9|12|10|9	17|15|7|9	48	12	0	0.75	0.91
PPP1R35-BirAFlag	NP_000979.1	RPL27	11|12|12|13|19|16|10|9|5|7|6|11	13|13|10|9	45	11.25	0	0.64	0.92
PPP1R35-BirAFlag	NP_000981.1	RPL27A	6|9|10|9|17|15|13|14|7|6|0|0	15|14|6|7	42	10.5	0	0.66	0.92
PPP1R35-BirAFlag	NP_000985.1	RPL32	8|8|7|3|8|10|0|4|4|4|3|3	9|10|8|5	32	8	0	0.89	0.88
PPP1R35-BirAFlag	NP_000958.1	RPL3	16|16|28|44|45|37|25|32|12|10|34|28	38|40|24|25	127	31.75	0	0.71	0.94
PPP1R35-BirAFlag	NP_000963.1	RPL7A	30|29|32|36|38|41|23|20|32|29|36|34	45|37|36|31	149	37.25	0	0.94	0.93
PPP1R35-BirAFlag	NP_000995.1	RPLP2	12|14|24|27|35|38|72|73|31|35|62|67	26|27|27|24	104	26	0	0.36	0.94
PPP1R35-BirAFlag	NP_002941.1	RPN1	11|8|14|17|14|14|24|18|17|13|12|24	44|43|24|19	130	32.5	0	1.35	0.9
PPP1R35-BirAFlag	NP_001006.1	RPS11	10|11|14|14|14|14|7|7|5|6|6|9	9|13|12|13	47	11.75	0	0.84	0.91
PPP1R35-BirAFlag	NP_001008.1	RPS13	10|9|10|14|8|8|0|0|4|4|4|8	5|5|0|4	14	3.5	0	0.29	0.94
PPP1R35-BirAFlag	NP_001011.1	RPS16	12|12|22|24|37|35|27|27|9|12|16|15	43|44|15|14	116	29	0	0.81	0.93
PPP1R35-BirAFlag	NP_001013.1	RPS19	5|6|6|6|5|5|0|0|4|4|0|0	3|4|0|0	7	1.75	0	0.29	0.88
PPP1R35-BirAFlag	NP_001016.1	RPS23	7|7|7|7|13|14|7|5|8|6|8|8	9|10|9|7	35	8.75	0	0.65	0.92
PPP1R35-BirAFlag	NP_001019.1	RPS25	7|5|9|8|15|14|14|11|9|10|10|11	13|13|8|7	41	10.25	0	0.71	0.91
PPP1R35-BirAFlag	NP_001021.1	RPS27	0|0|0|14|19|23|18|16|0|7|8|9	20|21|12|14	67	16.75	0	0.8	0.92
PPP1R35-BirAFlag	NP_001022.1	RPS28	5|6|5|6|0|0|0|0|4|0|6|0	8|7|6|4	25	6.25	0	1.04	0.83
PPP1R35-BirAFlag	NP_001002.1	RPS7	20|14|61|64|29|31|14|15|46|39|53|53	25|25|46|32	128	32	0	0.51	0.94
PPP1R35-BirAFlag	NP_001003.1	RPS8	29|34|37|45|57|60|55|57|35|33|32|30	59|63|51|44	217	54.25	0	0.93	0.94
PPP1R35-BirAFlag	NP_003698.1	RUVBL1	49|59|111|96|97|92|317|324|177|167|206|196	1769|1770|2039|2206	7784	1946	1	6.07	0
PPP1R35-BirAFlag	NP_003861.1	IQGAP1	3|0|7|8|4|0|4|5|3|3|7|7	8|7|6|6	27	6.75	0	0.9	0.87
PPP1R35-BirAFlag	NP_003760.1	SRSF9	3|4|4|7|6|5|0|4|0|2|0|2	6|6|2|0	14	3.5	0	0.54	0.87
PPP1R35-BirAFlag	NP_003085.1	SNRPE	0|6|12|11|10|11|16|18|10|12|14|19	14|18|10|8	50	12.5	0	0.68	0.92
PPP1R35-BirAFlag	NP_003086.1	SNRPF	0|0|0|0|0|6|10|8|13|17|18|19	9|7|16|14	46	11.5	0	0.62	0.92
PPP1R35-BirAFlag	NP_003785.1	SNX4	0|0|0|0|2|0|5|9|5|7|4|10	3|2|0|0	5	1.25	0	0.13	0.94
PPP1R35-BirAFlag	NP_003137.1	SSRP1	13|12|15|24|18|15|19|18|8|9|19|12	15|13|6|3	37	9.25	0	0.43	0.94
PPP1R35-BirAFlag	NP_003464.1	STAM	0|0|13|12|15|12|18|19|7|14|12|10	6|6|3|4	19	4.75	0	0.26	0.94
PPP1R35-BirAFlag	NP_003926.1	TOP3B	0|0|3|0|2|0|20|19|5|11|12|12	21|22|19|24	86	21.5	0	1.1	0.92
PPP1R35-BirAFlag	NP_003290.1	HSP90B1	16|8|20|18|12|20|4|5|2|0|4|5	13|11|4|4	32	8	0	0.4	0.93
PPP1R35-BirAFlag	NP_003305.1	TTC1	0|0|4|4|6|6|7|7|2|0|4|0	10|9|4|4	27	6.75	0	0.96	0.84
PPP1R35-BirAFlag	NP_001062.1	TYMS	0|0|0|0|0|0|4|7|0|0|0|6	6|5|0|0	11	2.75	0	0.42	0.87
PPP1R35-BirAFlag	NP_003960.1	UBE2M	0|3|3|0|5|0|44|39|15|12|11|6	6|0|0|0	6	1.5	0	0.04	0.94
PPP1R35-BirAFlag	NP_003364.1	VCL	12|16|28|28|9|9|35|31|30|32|45|38	13|11|4|5	33	8.25	0	0.2	0.94
PPP1R35-BirAFlag	NP_003365.1	VDAC1	15|12|27|27|22|19|32|38|23|22|27|24	46|54|17|17	134	33.5	0	0.96	0.93
PPP1R35-BirAFlag	NP_003391.1	XPO1	2|7|20|20|6|6|7|7|4|4|15|22	13|13|15|10	51	12.75	0	0.61	0.93
PPP1R35-BirAFlag	NP_003671.1	YARS	11|14|24|11|11|10|13|13|4|6|13|12	20|20|7|8	55	13.75	0	0.72	0.92
PPP1R35-BirAFlag	NP_003428.1	ZNF136	0|0|0|0|0|0|0|0|0|0|0|0	3|5|0|0	8	2	0.49	20	0.31
PPP1R35-BirAFlag	NP_003452.1	ZYX	2|5|14|17|10|5|19|17|15|13|32|25	3|2|7|7	19	4.75	0	0.17	0.94
PPP1R35-BirAFlag	NP_065779.1	ESYT2	3|4|9|13|6|2|12|11|10|9|22|15	9|7|5|5	26	6.5	0	0.35	0.94
PPP1R35-BirAFlag	NP_001340.2	DARS	6|13|16|13|50|56|28|28|8|13|12|9	36|34|9|9	88	22	0	0.42	0.94
PPP1R35-BirAFlag	NP_031398.2	DDX42	29|34|48|51|45|43|144|144|93|81|101|106	41|48|18|15	122	30.5	0	0.21	0.94
PPP1R35-BirAFlag	NP_995314.1	NCKAP1	12|11|23|24|16|19|18|14|20|19|23|15	12|12|18|15	57	14.25	0	0.61	0.93
PPP1R35-BirAFlag	NP_000010.1	ACAT1	2|3|9|8|2|0|4|0|3|2|8|6	5|5|0|3	13	3.25	0	0.38	0.9
PPP1R35-BirAFlag	NP_000373.1	ALDH3A2	11|12|17|23|26|27|35|33|10|12|21|19	21|23|5|8	57	14.25	0	0.42	0.94
PPP1R35-BirAFlag	NP_000048.1	BLM	0|0|0|0|0|0|3|7|0|2|4|3	2|3|0|0	5	1.25	0	0.23	0.87
PPP1R35-BirAFlag	NP_001316.1	CSTF2	0|0|8|0|0|0|0|0|0|0|9|0	3|0|0|0	3	0.75	0	0.09	0.91
PPP1R35-BirAFlag	NP_001379.1	DRG2	4|5|6|9|5|2|11|10|7|7|18|20	4|7|0|8	19	4.75	0	0.25	0.94
PPP1R35-BirAFlag	NP_000108.1	EMD	9|10|7|10|10|8|25|25|15|14|17|20	12|10|6|6	34	8.5	0	0.34	0.94
PPP1R35-BirAFlag	NP_001490.1	GLE1	0|0|0|2|0|0|2|0|0|0|0|0	7|4|0|4	15	3.75	0.1	1.88	0.63
PPP1R35-BirAFlag	NP_001542.1	IGBP1	0|5|6|6|4|6|29|26|18|20|22|15	12|10|3|3	28	7	0	0.25	0.94
PPP1R35-BirAFlag	NP_055181.3	GNL3	6|13|20|22|23|22|25|27|17|25|34|30	16|12|21|17	66	16.5	0	0.52	0.94
PPP1R35-BirAFlag	NP_055144.3	EDC4	23|27|58|49|48|52|48|47|35|31|46|53	12|20|36|43	111	27.75	0	0.5	0.94
PPP1R35-BirAFlag	NP_006055.3	RRAGB	0|0|2|0|2|0|5|5|0|0|0|0	6|5|0|0	11	2.75	0	0.55	0.83
PPP1R35-BirAFlag	NP_055501.2	KIAA0355	0|0|0|0|0|0|0|0|0|0|0|0	7|7|4|0	18	4.5	0.75	45	0.06
PPP1R35-BirAFlag	NP_997006.1	GAB1	2|5|5|5|5|7|15|15|11|13|10|11	6|7|0|4	17	4.25	0	0.28	0.94
PPP1R35-BirAFlag	NP_004356.2	CETN3	0|0|0|0|0|0|0|0|0|0|0|0	6|6|4|0	16	4	0.75	40	0.06
PPP1R35-BirAFlag	NP_060530.3	IARS2	2|0|0|2|0|0|2|0|0|0|0|0	19|18|11|16	64	16	0.99	8	0
PPP1R35-BirAFlag	NP_009006.2	WDR45	6|7|10|7|6|8|6|6|13|13|13|11	16|15|19|17	67	16.75	0	1.29	0.89
PPP1R35-BirAFlag	NP_004837.1	EIF4E2	6|10|14|17|28|33|9|10|9|9|7|12	27|28|41|42	138	34.5	0	1.13	0.93
PPP1R35-BirAFlag	NP_597677.2	NIPBL	0|0|0|0|0|5|8|6|2|4|4|4	2|7|0|0	9	2.25	0	0.32	0.87
PPP1R35-BirAFlag	NP_004273.1	BAG2	6|7|7|8|8|8|6|6|6|5|5|4	9|8|3|5	25	6.25	0	0.78	0.87
PPP1R35-BirAFlag	NP_004716.1	BUB3	3|7|9|9|23|24|36|35|8|6|13|10	24|25|6|9	64	16	0	0.45	0.94
PPP1R35-BirAFlag	NP_004335.1	CETN2	0|0|0|0|0|0|0|0|0|0|6|0	6|7|7|0	20	5	0.01	1.67	0.69
PPP1R35-BirAFlag	NP_004636.1	COIL	0|0|8|7|4|5|22|21|6|11|13|13	6|7|5|5	23	5.75	0	0.27	0.94
PPP1R35-BirAFlag	NP_004757.1	COPB2	0|2|0|3|0|2|5|7|0|4|2|7	8|8|4|4	24	6	0	0.86	0.86
PPP1R35-BirAFlag	NP_004395.1	2002-09-01	14|18|43|50|47|37|39|36|27|35|38|45	28|27|27|26	108	27	0	0.56	0.94
PPP1R35-BirAFlag	NP_004413.1	DVL2	14|14|28|30|36|34|23|22|13|9|14|13	34|35|21|22	112	28	0	0.8	0.93
PPP1R35-BirAFlag	NP_004085.1	EIF2S1	3|2|6|10|8|7|15|12|4|7|8|10	24|21|10|7	62	15.5	0	1.15	0.86
PPP1R35-BirAFlag	NP_004452.1	FARSA	6|4|19|16|10|11|19|14|10|5|21|17	24|22|14|10	70	17.5	0	0.88	0.92
PPP1R35-BirAFlag	NP_004102.1	FEN1	5|5|15|10|15|9|33|39|23|26|31|25	13|12|3|3	31	7.75	0	0.22	0.94
PPP1R35-BirAFlag	NP_004119.1	GTF2F2	0|2|4|3|9|9|19|18|13|13|17|16	6|9|6|4	25	6.25	0	0.34	0.94
PPP1R35-BirAFlag	NP_004703.1	HGS	0|0|3|6|4|3|5|4|0|0|0|4	7|5|0|0	12	3	0	0.55	0.83
PPP1R35-BirAFlag	NP_004689.1	PRPF3	8|9|17|15|9|9|40|37|19|19|26|23	17|13|11|10	51	12.75	0	0.33	0.94
PPP1R35-BirAFlag	NP_004896.1	PRDX6	7|11|35|32|35|40|45|45|19|25|34|32	31|33|18|12	94	23.5	0	0.52	0.94
PPP1R35-BirAFlag	NP_004535.1	NDUFA10	2|3|9|8|7|5|10|11|7|9|5|11	16|13|10|9	48	12	0	1.09	0.88
PPP1R35-BirAFlag	NP_004138.1	DRG1	12|9|17|17|25|18|46|47|27|24|33|25	32|32|21|20	105	26.25	0	0.56	0.94
PPP1R35-BirAFlag	NP_004556.1	PEX14	3|6|13|12|17|17|7|11|7|4|14|7	6|5|10|11	32	8	0	0.47	0.92
PPP1R35-BirAFlag	NP_004721.1	ETF1	23|20|29|26|36|34|31|26|26|28|23|22	19|15|8|7	49	12.25	0	0.35	0.94
PPP1R35-BirAFlag	NP_004773.1	SNAP29	5|6|10|9|19|17|31|31|9|10|11|13	15|13|4|0	32	8	0	0.26	0.94
PPP1R35-BirAFlag	NP_004699.1	PDCD5	11|14|14|18|8|9|37|33|31|30|38|32	26|26|21|16	89	22.25	0	0.59	0.94
PPP1R35-BirAFlag	NP_004715.1	ZW10	2|0|3|4|0|0|4|8|0|0|8|8	7|6|5|7	25	6.25	0	0.78	0.88
PPP1R35-BirAFlag	NP_060458.3	SCYL2	0|3|10|11|6|5|4|3|3|7|5|5	4|3|13|11	31	7.75	0	0.74	0.89
PPP1R35-BirAFlag	NP_998784.1	ATP6V1H	0|4|4|8|0|0|2|3|0|2|6|6	5|5|3|0	13	3.25	0	0.46	0.88
PPP1R35-BirAFlag	NP_003015.2	ITSN1	9|12|24|17|58|63|16|16|6|7|21|12	7|7|12|6	32	8	0	0.13	0.94
PPP1R35-BirAFlag	NP_004930.1	DDX1	17|11|31|33|32|28|16|19|29|33|35|41	15|13|29|28	85	21.25	0	0.56	0.94
PPP1R35-BirAFlag	NP_004932.1	DHX8	0|0|2|0|3|0|25|28|3|0|5|10	3|4|0|0	7	1.75	0	0.07	0.94
PPP1R35-BirAFlag	NP_004999.1	NHP2L1	5|0|0|4|0|2|6|7|2|5|0|0	6|7|0|0	13	3.25	0	0.5	0.86
PPP1R35-BirAFlag	NP_005013.1	PFN1	6|4|6|5|5|5|34|39|25|28|23|17	15|15|8|7	45	11.25	0	0.31	0.94
PPP1R35-BirAFlag	NP_005042.1	QARS	4|9|19|19|34|44|32|34|7|16|23|25	7|5|10|11	33	8.25	0	0.21	0.94
PPP1R35-BirAFlag	NP_005057.1	SFPQ	53|50|52|67|73|88|83|93|67|69|92|90	71|61|54|51	237	59.25	0	0.64	0.94
PPP1R35-BirAFlag	NP_005070.1	TPD52	6|5|8|7|5|5|8|8|7|8|10|13	3|3|0|0	6	1.5	0	0.13	0.94
PPP1R35-BirAFlag	NP_005142.1	USP14	29|25|33|27|31|24|80|71|37|46|48|50	27|23|12|13	75	18.75	0	0.25	0.94
PPP1R35-BirAFlag	NP_001001563.1	TIMM50	8|7|21|19|12|9|18|19|15|19|24|29	27|29|25|16	97	24.25	0	0.92	0.93
PPP1R35-BirAFlag	NP_002617.3	PFKL	10|14|25|26|11|8|6|14|12|16|14|15	18|21|13|12	64	16	0	0.63	0.93
PPP1R35-BirAFlag	NP_005040.2	PWP2	0|0|4|0|0|0|6|3|0|0|0|3	5|2|0|0	7	1.75	0	0.35	0.84
PPP1R35-BirAFlag	NP_006576.2	CCT8	194|196|301|272|333|339|541|588|281|293|325|361	821|817|343|335	2316	579	0	1.03	0.94
PPP1R35-BirAFlag	NP_005198.1	CRKL	62|56|93|95|92|95|193|198|92|97|134|118	181|170|66|83	500	125	0	0.64	0.94
PPP1R35-BirAFlag	NP_005436.1	SMC3	16|13|30|24|23|24|35|27|19|26|25|22	19|14|11|8	52	13	0	0.4	0.94
PPP1R35-BirAFlag	NP_005435.1	RQCD1	3|0|4|0|0|0|0|0|0|0|0|0	5|2|7|9	23	5.75	0.02	1.64	0.68
PPP1R35-BirAFlag	NP_005490.1	UBA2	4|2|8|5|13|13|35|33|15|13|12|14	24|19|10|9	62	15.5	0	0.46	0.94
PPP1R35-BirAFlag	NP_694574.3	N4BP1	5|6|6|4|10|10|18|14|10|13|14|12	5|7|8|11	31	7.75	0	0.48	0.92
PPP1R35-BirAFlag	NP_003746.2	EIF3G	0|0|8|9|16|16|15|16|3|5|5|8	19|19|10|8	56	14	0	0.88	0.91
PPP1R35-BirAFlag	NP_063937.2	GSK3A	0|0|0|0|0|0|0|0|0|0|0|0	13|13|3|2	31	7.75	0.92	77.5	0.01
PPP1R35-BirAFlag	NP_001408.2	EIF4B	20|14|48|51|51|47|96|105|35|36|53|67	44|41|21|17	123	30.75	0	0.31	0.94
PPP1R35-BirAFlag	NP_940888.2	RPL7L1	2|4|10|7|8|6|7|7|0|0|7|6	10|8|0|0	18	4.5	0	0.5	0.88
PPP1R35-BirAFlag	NP_001001992.1	USP16	3|4|6|8|8|8|16|19|10|6|12|19	5|6|0|0	11	2.75	0	0.14	0.94
PPP1R35-BirAFlag	NP_005712.1	ACTR3	0|0|0|0|0|0|7|5|2|3|4|0	6|4|0|0	10	2.5	0	0.42	0.86
PPP1R35-BirAFlag	NP_005849.1	AKAP8	0|0|0|0|0|0|4|5|0|0|0|2	4|5|0|0	9	2.25	0	0.5	0.82
PPP1R35-BirAFlag	NP_005863.1	BCAS2	5|7|15|5|9|11|14|19|8|11|9|8	9|13|8|3	33	8.25	0	0.49	0.92
PPP1R35-BirAFlag	NP_005871.1	DNAJA2	5|5|8|14|12|10|14|10|10|9|18|15	54|54|51|63	222	55.5	1	3.36	0
PPP1R35-BirAFlag	NP_005733.1	PDIA6	9|14|14|20|12|9|4|5|12|10|14|13	2|4|9|7	22	5.5	0	0.32	0.94
PPP1R35-BirAFlag	NP_005737.1	NAMPT	7|9|28|35|10|0|4|5|13|12|23|26	20|23|24|20	87	21.75	0	0.69	0.93
PPP1R35-BirAFlag	NP_005796.1	PSMD14	6|6|6|5|6|4|4|5|4|0|0|4	6|7|0|0	13	3.25	0	0.54	0.85
PPP1R35-BirAFlag	NP_005724.1	KIF20A	0|0|0|0|0|0|5|6|0|0|0|0	7|6|0|0	13	3.25	0	0.59	0.83
PPP1R35-BirAFlag	NP_005769.1	RBM5	0|0|0|0|0|0|10|16|0|0|0|0	3|5|0|0	8	2	0	0.15	0.92
PPP1R35-BirAFlag	NP_005605.1	RHEB	4|5|8|6|7|7|0|5|6|6|0|0	10|9|4|0	23	5.75	0	0.77	0.85
PPP1R35-BirAFlag	NP_005608.1	RPS14	14|13|26|17|26|26|21|26|15|13|23|20	21|25|17|18	81	20.25	0	0.78	0.93
PPP1R35-BirAFlag	NP_005841.1	SF3B4	0|0|8|4|0|0|0|5|0|2|16|17	8|9|11|6	34	8.5	0	0.52	0.92
PPP1R35-BirAFlag	NP_005862.1	SMNDC1	0|0|5|6|4|0|20|22|14|10|24|23	3|0|0|0	3	0.75	0	0.03	0.94
PPP1R35-BirAFlag	NP_005753.1	TRIM28	32|26|76|71|83|74|151|171|69|61|110|91	109|98|52|50	309	77.25	0	0.48	0.94
PPP1R35-BirAFlag	NP_001272.2	TBCB	3|3|4|4|0|0|22|18|5|7|11|11	2|0|0|0	2	0.5	0	0.03	0.94
PPP1R35-BirAFlag	NP_060644.4	MAP1S	0|0|0|0|3|2|6|4|0|4|0|0	4|5|0|0	9	2.25	0	0.45	0.84
PPP1R35-BirAFlag	NP_001002269.1	EXOSC3	0|0|6|6|0|0|9|9|7|5|16|12	8|7|14|9	38	9.5	0	0.68	0.91
PPP1R35-BirAFlag	NP_003357.2	UQCRC2	20|17|24|27|25|25|8|11|19|13|16|21	33|33|13|16	95	23.75	0	0.91	0.92
PPP1R35-BirAFlag	NP_003081.2	SNRPA1	15|18|38|40|37|37|83|79|38|38|63|61	33|29|28|28	118	29.5	0	0.36	0.94
PPP1R35-BirAFlag	NP_001002800.1	SMC4	5|2|6|5|14|14|12|10|5|4|0|0	5|6|0|2	13	3.25	0	0.23	0.94
PPP1R35-BirAFlag	NP_005917.2	MFAP1	0|4|4|4|9|6|37|44|10|9|16|15	30|30|5|8	73	18.25	0	0.45	0.94
PPP1R35-BirAFlag	NP_061915.2	PUS7	2|3|10|12|2|3|35|33|24|28|44|42	8|4|0|0	12	3	0	0.07	0.94
PPP1R35-BirAFlag	NP_056450.2	GAPVD1	31|25|39|38|71|67|63|60|36|39|41|30	52|41|46|39	178	44.5	0	0.64	0.94
PPP1R35-BirAFlag	NP_002304.3	ABLIM1	0|0|0|0|0|0|19|19|4|6|8|4	3|6|0|0	9	2.25	0	0.12	0.93
PPP1R35-BirAFlag	NP_004044.3	BYSL	0|0|4|4|0|2|5|5|2|3|4|6	3|2|3|4	12	3	0	0.55	0.86
PPP1R35-BirAFlag	NP_003153.2	STRN	3|3|6|4|0|0|0|0|2|0|5|0	3|2|7|3	15	3.75	0	0.68	0.83
PPP1R35-BirAFlag	NP_006089.1	GNB2L1	31|26|34|35|67|68|63|63|34|32|30|29	80|81|34|27	222	55.5	0	0.82	0.94
PPP1R35-BirAFlag	NP_005960.1	NAP1L4	10|10|28|34|17|16|22|21|17|21|38|38	50|49|43|41	183	45.75	0	1.2	0.93
PPP1R35-BirAFlag	NP_006080.1	SCML2	37|33|58|59|51|57|172|164|107|103|135|112	75|75|43|47	240	60	0	0.36	0.94
PPP1R35-BirAFlag	NP_064555.2	NCLN	0|0|3|3|3|3|3|2|0|9|7|7	7|4|2|5	18	4.5	0	0.56	0.89
PPP1R35-BirAFlag	NP_056075.1	SIN3B	14|16|56|55|46|44|24|26|18|16|22|33	68|69|103|97	337	84.25	0	1.52	0.93
PPP1R35-BirAFlag	NP_005179.2	CBL	3|4|9|7|7|5|26|23|9|13|19|19	16|14|14|11	55	13.75	0	0.56	0.93
PPP1R35-BirAFlag	NP_115612.4	USP48	0|0|0|0|3|2|16|11|2|0|4|4	3|2|0|0	5	1.25	0	0.09	0.94
PPP1R35-BirAFlag	NP_001524.2	HNRNPL	11|9|30|27|42|33|68|63|35|27|44|52	23|30|22|25	100	25	0	0.38	0.94
PPP1R35-BirAFlag	NP_002801.1	PSMD4	9|5|12|11|14|18|24|16|10|11|9|12	16|19|8|8	51	12.75	0	0.61	0.93
PPP1R35-BirAFlag	NP_036558.3	SF3B3	36|35|49|43|95|87|131|114|61|67|72|63	136|152|85|85	458	114.5	0	0.93	0.94
PPP1R35-BirAFlag	NP_001005366.1	KDM2B	0|0|0|0|0|0|6|4|0|0|0|0	8|5|6|4	23	5.75	0	1.15	0.8
PPP1R35-BirAFlag	NP_006397.1	PRDX4	0|0|0|0|0|0|10|0|0|0|0|0	8|8|0|0	16	4	0	0.8	0.78
PPP1R35-BirAFlag	NP_006316.1	RAN	24|31|64|61|71|76|51|48|34|49|53|62	62|61|62|81	266	66.5	0	0.9	0.94
PPP1R35-BirAFlag	NP_006315.1	CFDP1	8|8|8|8|0|0|11|11|16|18|20|21	2|0|4|0	6	1.5	0	0.07	0.94
PPP1R35-BirAFlag	NP_006126.1	CAPZA1	33|30|46|40|64|58|70|90|40|33|47|63	41|42|48|41	172	43	0	0.54	0.94
PPP1R35-BirAFlag	NP_006127.1	CAPZA2	15|16|23|25|26|20|60|58|27|25|33|42	16|23|32|16	87	21.75	0	0.37	0.94
PPP1R35-BirAFlag	NP_006139.1	LASP1	4|4|3|5|0|3|12|10|7|6|11|10	7|7|2|0	16	4	0	0.35	0.91
PPP1R35-BirAFlag	NP_006181.1	ORC2	3|5|28|24|11|8|33|35|15|21|61|62	12|13|14|17	56	14	0	0.23	0.94
PPP1R35-BirAFlag	NP_006464.1	TAF6L	0|0|0|0|0|0|4|0|0|0|0|0	2|2|0|2	6	1.5	0	0.75	0.75
PPP1R35-BirAFlag	NP_006310.1	CDIPT	2|0|16|10|0|4|5|5|0|4|11|8	7|9|14|12	42	10.5	0	0.78	0.91
PPP1R35-BirAFlag	NP_006232.1	PPP1R2	0|0|2|4|0|0|9|8|6|5|4|6	4|8|2|3	17	4.25	0	0.5	0.89
PPP1R35-BirAFlag	NP_006247.1	PKN2	8|7|15|15|24|16|23|23|12|16|29|26	26|25|25|20	96	24	0	0.87	0.93
PPP1R35-BirAFlag	NP_006256.1	RAD21	0|0|0|0|0|0|5|9|0|2|4|0	4|0|0|0	4	1	0	0.14	0.89
PPP1R35-BirAFlag	NP_006382.1	IPO7	12|13|43|51|19|26|20|28|18|16|71|66	35|32|71|57	195	48.75	0	0.71	0.94
PPP1R35-BirAFlag	NP_006333.1	TACC3	2|0|8|7|9|12|12|19|2|0|4|4	5|5|0|0	10	2.5	0	0.16	0.94
PPP1R35-BirAFlag	NP_006286.1	VARS	9|8|29|35|18|19|27|27|19|24|30|30	11|12|10|8	41	10.25	0	0.32	0.94
PPP1R35-BirAFlag	NP_006827.1	GCN1L1	65|78|185|179|201|187|91|80|52|49|106|105	73|65|120|114	372	93	0	0.48	0.94
PPP1R35-BirAFlag	NP_055412.2	DNTTIP2	0|5|6|8|4|5|22|20|7|12|17|14	12|12|5|5	34	8.5	0	0.4	0.93
PPP1R35-BirAFlag	NP_055692.2	HELZ	0|0|0|5|0|0|2|2|0|0|0|0	16|13|13|15	57	14.25	0.92	4.07	0.02
PPP1R35-BirAFlag	NP_056046.1	NUP160	0|0|7|13|2|0|3|4|4|3|9|9	10|10|15|13	48	12	0	1.09	0.88
PPP1R35-BirAFlag	NP_114414.2	EIF2A	10|10|17|16|23|20|42|40|42|34|45|46	19|23|10|12	64	16	0	0.35	0.94
PPP1R35-BirAFlag	NP_067062.1	RBM25	0|0|2|0|9|10|23|27|2|0|10|7	15|12|6|0	33	8.25	0	0.33	0.93
PPP1R35-BirAFlag	NP_006833.2	SF3B2	16|16|30|28|39|41|66|70|40|28|47|45	79|82|57|48	266	66.5	0	0.98	0.94
PPP1R35-BirAFlag	NP_002574.2	PAWR	0|0|0|0|0|0|0|0|0|0|0|0	3|3|0|0	6	1.5	0.47	15	0.34
PPP1R35-BirAFlag	NP_003694.1	NOP14	0|0|3|0|0|0|20|19|0|6|7|8	4|6|3|0	13	3.25	0	0.17	0.93
PPP1R35-BirAFlag	NP_060791.3	BRIX1	0|3|6|12|4|5|2|3|3|2|5|0	3|2|5|5	15	3.75	0	0.42	0.9
PPP1R35-BirAFlag	NP_064581.2	XAB2	0|0|14|12|11|12|54|53|19|16|24|31	30|36|15|11	92	23	0	0.43	0.94
PPP1R35-BirAFlag	NP_002746.1	MAP2K1	4|2|0|0|0|3|9|10|3|0|0|0	15|14|0|0	29	7.25	0	0.76	0.85
PPP1R35-BirAFlag	NP_036473.2	GTPBP4	8|13|27|33|26|23|22|18|19|16|29|23	9|11|10|9	39	9.75	0	0.31	0.94
PPP1R35-BirAFlag	NP_005372.2	NCL	22|27|37|30|46|37|92|99|36|37|46|53	45|46|24|26	141	35.25	0	0.37	0.94
PPP1R35-BirAFlag	NP_000217.2	KRT9	0|0|0|0|17|21|5|6|13|15|17|19	13|10|9|8	40	10	0	0.5	0.93
PPP1R35-BirAFlag	NP_112556.2	HNRNPAB	7|11|16|16|21|19|25|20|7|9|12|9	23|19|8|7	57	14.25	0	0.62	0.93
PPP1R35-BirAFlag	NP_001007226.1	IGF2BP2	2|0|18|18|10|8|37|43|16|20|16|18	40|47|20|22	129	32.25	0	0.81	0.93
PPP1R35-BirAFlag	NP_073568.2	NUCKS1	0|0|5|3|0|0|45|39|6|0|15|16	7|5|0|0	12	3	0	0.07	0.94
PPP1R35-BirAFlag	NP_005852.2	STUB1	0|0|6|7|0|0|9|7|5|6|9|12	10|9|10|12	41	10.25	0	0.98	0.89
PPP1R35-BirAFlag	NP_057371.2	HP1BP3	7|8|11|12|17|14|50|52|20|21|15|20	16|20|5|5	46	11.5	0	0.23	0.94
PPP1R35-BirAFlag	NP_004438.3	EPS8	0|0|0|0|0|0|0|0|0|0|0|0	4|3|0|0	7	1.75	0.48	17.5	0.32
PPP1R35-BirAFlag	NP_056290.3	FAM98A	4|0|6|5|5|4|5|5|3|3|5|7	5|0|2|0	7	1.75	0	0.27	0.88
PPP1R35-BirAFlag	NP_078787.2	HAUS3	4|4|15|13|21|17|3|4|3|0|9|6	9|11|45|43	108	27	0	1.42	0.77
PPP1R35-BirAFlag	NP_001008697.1	TFIP11	9|12|32|20|22|22|43|45|20|18|24|22	26|25|26|21	98	24.5	0	0.56	0.94
PPP1R35-BirAFlag	NP_001008938.1	CKAP5	50|52|80|78|139|132|112|118|52|57|71|70	95|97|99|105	396	99	0	0.73	0.94
PPP1R35-BirAFlag	NP_006518.1	SLBP	0|0|0|0|0|0|11|9|0|4|3|3	9|11|0|0	20	5	0	0.5	0.89
PPP1R35-BirAFlag	NP_006658.1	PGRMC1	2|4|4|3|5|4|7|6|0|5|6|5	15|14|5|0	34	8.5	0	1.31	0.73
PPP1R35-BirAFlag	NP_006591.1	NUDC	48|47|48|53|56|58|105|107|62|50|59|47	180|182|45|59	466	116.5	0	1.1	0.94
PPP1R35-BirAFlag	NP_006657.1	RUVBL2	60|60|76|87|103|99|196|200|88|98|136|131	1181|1217|1271|1640	5309	1327.25	1	6.7	0
PPP1R35-BirAFlag	NP_006535.1	EXOC5	0|0|0|0|0|0|0|0|0|0|0|0	2|4|0|0	6	1.5	0.43	15	0.36
PPP1R35-BirAFlag	NP_006695.1	SUGT1	8|9|14|21|10|17|44|39|18|17|26|30	92|80|45|48	265	66.25	0	1.6	0.88
PPP1R35-BirAFlag	NP_006546.1	YKT6	6|8|17|12|12|13|27|31|38|40|37|41	21|19|8|6	54	13.5	0	0.33	0.94
PPP1R35-BirAFlag	NP_055970.1	LARP4B	0|0|9|7|0|2|6|6|6|4|7|9	6|7|0|3	16	4	0	0.44	0.9
PPP1R35-BirAFlag	NP_542790.2	ZSWIM3	0|0|0|0|0|0|0|0|0|0|0|0	2|5|0|2	9	2.25	0.62	22.5	0.15
PPP1R35-BirAFlag	NP_055871.1	RRP1B	3|6|15|12|23|17|24|25|7|11|11|14	12|8|6|3	29	7.25	0	0.3	0.94
PPP1R35-BirAFlag	NP_056340.2	IBTK	5|7|9|13|12|14|10|9|2|5|7|4	33|36|20|25	114	28.5	0.08	2.11	0.64
PPP1R35-BirAFlag	NP_006796.1	HNRNPA0	11|13|23|23|21|23|22|23|13|15|19|18	23|24|13|14	74	18.5	0	0.8	0.93
PPP1R35-BirAFlag	NP_006793.1	SF3A3	4|5|12|19|25|23|38|36|8|11|22|22	28|23|15|11	77	19.25	0	0.52	0.94
PPP1R35-BirAFlag	NP_006810.1	STIP1	7|6|13|8|7|6|24|26|8|6|8|8	21|24|9|5	59	14.75	0	0.59	0.93
PPP1R35-BirAFlag	NP_006775.1	WDR3	0|0|9|6|2|0|12|6|2|3|10|8	9|8|3|4	24	6	0	0.55	0.91
PPP1R35-BirAFlag	NP_060139.2	ERCC6L	0|2|8|10|8|8|12|11|8|5|12|11	13|13|13|16	55	13.75	0	1.15	0.89
PPP1R35-BirAFlag	NP_219485.1	HAUS8	3|0|10|10|10|10|10|11|3|0|8|6	12|10|34|28	84	21	0.3	2	0.41
PPP1R35-BirAFlag	NP_001009999.1	KDM1A	6|0|7|6|6|9|14|13|12|16|12|13	13|15|14|17	59	14.75	0	0.98	0.91
PPP1R35-BirAFlag	NP_008996.1	CDC37	3|3|12|8|5|4|18|19|7|4|17|13	38|36|26|26	126	31.5	0	1.7	0.85
PPP1R35-BirAFlag	NP_008937.1	NUDT21	16|14|19|19|25|17|33|37|28|27|28|24	34|37|30|23	124	31	0	0.89	0.93
PPP1R35-BirAFlag	NP_008869.1	SNRPD1	5|4|0|5|4|6|14|18|8|6|8|7	8|8|0|6	22	5.5	0	0.34	0.93
PPP1R35-BirAFlag	NP_008909.1	RNF113A	0|0|0|0|0|3|4|4|0|3|0|0	5|5|0|0	10	2.5	0	0.62	0.8
PPP1R35-BirAFlag	NP_001202.4	BUB1B	6|7|11|17|23|22|25|27|9|14|17|12	33|34|22|30	119	29.75	0	1.14	0.92
PPP1R35-BirAFlag	NP_001012321.1	RPSA	4|5|8|11|6|5|11|10|9|8|17|11	4|5|6|2	17	4.25	0	0.3	0.94
PPP1R35-BirAFlag	NP_009123.1	SUPT16H	18|17|25|25|31|27|35|35|14|14|14|14	28|26|9|11	74	18.5	0	0.53	0.94
PPP1R35-BirAFlag	NP_009202.1	STK38	9|15|17|12|22|23|33|33|29|29|29|29	20|19|17|14	70	17.5	0	0.53	0.94
PPP1R35-BirAFlag	NP_009121.1	SEC23IP	5|9|10|13|20|18|26|24|11|11|15|12	4|2|11|6	23	5.75	0	0.23	0.94
PPP1R35-BirAFlag	NP_009140.1	RPL35	5|5|15|10|12|11|4|3|9|12|10|9	8|8|8|11	35	8.75	0	0.65	0.91
PPP1R35-BirAFlag	NP_009210.1	U2AF2	10|5|42|24|18|20|29|33|26|24|49|44	23|17|20|25	85	21.25	0	0.46	0.94
PPP1R35-BirAFlag	NP_009057.1	VCP	49|54|125|146|126|118|19|20|10|12|16|17	11|6|6|5	28	7	0	0.05	0.94
PPP1R35-BirAFlag	NP_113584.3	HUWE1	0|2|9|10|0|0|0|0|2|0|4|6	10|11|5|3	29	7.25	0	0.76	0.88
PPP1R35-BirAFlag	NP_006222.2	POLE	0|0|2|0|0|0|0|0|0|0|0|0	2|3|2|0	7	1.75	0.04	1.75	0.66
PPP1R35-BirAFlag	NP_004437.2	EPRS	32|29|47|54|77|67|40|43|22|22|28|17	41|33|34|33	141	35.25	0	0.49	0.94
PPP1R35-BirAFlag	NP_078934.3	IPO4	0|0|4|7|0|0|0|0|2|0|7|8	3|5|2|0	10	2.5	0	0.33	0.89
PPP1R35-BirAFlag	NP_001015048.1	BAG5	0|0|0|0|0|0|0|0|0|0|0|0	4|3|0|0	7	1.75	0.48	17.5	0.32
PPP1R35-BirAFlag	NP_055444.2	ARHGEF10	0|0|0|0|0|2|0|0|0|0|2|0	2|0|3|0	5	1.25	0	0.62	0.75
PPP1R35-BirAFlag	NP_001017408.1	GOPC	0|0|0|0|0|0|3|0|0|0|0|0	7|4|2|0	13	3.25	0.1	2.17	0.63
PPP1R35-BirAFlag	NP_068749.3	RINT1	0|0|0|0|0|0|0|0|2|2|0|3	4|5|11|14	34	8.5	0.48	3.4	0.34
PPP1R35-BirAFlag	NP_001112.2	ADD3	11|11|17|16|25|25|35|35|19|22|13|16	10|15|3|3	31	7.75	0	0.22	0.94
PPP1R35-BirAFlag	NP_003123.2	SRM	0|0|3|0|4|2|8|6|5|5|3|4	10|9|2|4	25	6.25	0	0.89	0.84
PPP1R35-BirAFlag	NP_848604.3	STXBP4	0|0|0|0|2|2|4|0|3|9|18|20	9|6|7|6	28	7	0	0.37	0.93
PPP1R35-BirAFlag	NP_057562.3	ZC3HC1	0|0|0|0|0|0|5|5|0|0|4|4	2|3|0|0	5	1.25	0	0.25	0.86
PPP1R35-BirAFlag	NP_115553.2	PHAX	6|0|17|15|13|14|32|28|8|8|12|14	18|23|9|9	59	14.75	0	0.49	0.93
PPP1R35-BirAFlag	NP_982278.3	PPAPDC2	0|0|0|0|0|0|0|0|0|0|0|0	2|3|0|0	5	1.25	0.42	12.5	0.37
PPP1R35-BirAFlag	NP_031401.1	TARDBP	3|4|7|7|12|6|17|15|8|9|17|17	15|16|6|4	41	10.25	0	0.6	0.92
PPP1R35-BirAFlag	NP_004993.1	NDUFA9	7|5|8|14|6|7|0|0|7|6|8|7	8|5|10|8	31	7.75	0	0.7	0.9
PPP1R35-BirAFlag	NP_000875.2	IMPDH2	0|0|0|0|5|2|3|4|0|0|0|0	2|0|10|9	21	5.25	0	1.17	0.73
PPP1R35-BirAFlag	NP_061903.2	DHX29	0|2|23|28|27|23|25|21|18|19|32|31	21|18|23|28	90	22.5	0	0.71	0.93
PPP1R35-BirAFlag	NP_001012339.2	DNAJC21	0|0|0|2|0|0|3|6|0|0|0|2	2|0|0|0	2	0.5	0	0.11	0.86
PPP1R35-BirAFlag	NP_005073.2	TRIM25	14|20|22|29|33|28|41|36|32|31|47|45	28|24|19|21	92	23	0	0.5	0.94
PPP1R35-BirAFlag	NP_001349.2	DHX15	30|32|38|45|48|42|76|74|43|43|59|55	40|39|22|30	131	32.75	0	0.44	0.94
PPP1R35-BirAFlag	NP_008924.1	NPM3	0|4|6|8|3|0|3|5|8|8|7|9	2|0|5|6	13	3.25	0	0.38	0.9
PPP1R35-BirAFlag	NP_036243.1	AHSA1	25|22|33|25|33|29|46|39|42|38|48|53	39|41|28|18	126	31.5	0	0.62	0.94
PPP1R35-BirAFlag	NP_036552.1	IFIT5	8|9|44|38|35|29|34|43|34|29|53|59	16|20|14|22	72	18	0	0.32	0.94
PPP1R35-BirAFlag	NP_036377.1	SNW1	0|3|16|21|9|13|58|56|24|18|34|34	23|28|14|13	78	19.5	0	0.34	0.94
PPP1R35-BirAFlag	NP_036614.1	ZNF281	0|0|8|8|5|6|13|12|6|5|16|15	18|15|19|23	75	18.75	0	1.21	0.9
PPP1R35-BirAFlag	NP_001002019.1	PUS1	0|2|6|8|2|0|5|4|2|0|5|2	3|2|3|2	10	2.5	0	0.36	0.94
PPP1R35-BirAFlag	NP_037417.1	GNL2	7|5|13|13|19|19|50|53|20|15|18|18	30|27|19|18	94	23.5	0	0.46	0.94
PPP1R35-BirAFlag	NP_037386.1	TBK1	7|4|11|9|10|7|5|5|0|0|6|0	23|24|23|23	93	23.25	0	2.21	0.75
PPP1R35-BirAFlag	NP_001389.2	ECH1	2|4|11|6|14|19|0|0|0|0|0|0	3|0|4|5	12	3	0	0.18	0.93
PPP1R35-BirAFlag	NP_055888.1	SIPA1L3	0|0|0|0|3|0|0|0|0|2|0|0	4|0|0|3	7	1.75	0	0.7	0.75
PPP1R35-BirAFlag	NP_006176.2	NUMA1	8|8|29|26|48|44|93|96|31|29|45|61	28|27|23|12	90	22.5	0	0.24	0.94
PPP1R35-BirAFlag	NP_001119.3	AP1G1	0|0|0|2|0|0|0|0|0|0|0|0	2|2|2|0	6	1.5	0.02	1.5	0.67
PPP1R35-BirAFlag	NP_001164.2	ARHGAP5	0|0|0|2|0|2|6|7|6|3|3|6	6|0|0|0	6	1.5	0	0.23	0.87
PPP1R35-BirAFlag	NP_038470.1	STOML2	0|0|6|8|0|0|2|0|0|0|0|0	3|3|0|0	6	1.5	0	0.21	0.9
PPP1R35-BirAFlag	NP_060542.4	HEATR1	2|0|11|6|5|8|24|23|7|5|8|6	9|7|0|6	22	5.5	0	0.23	0.93
PPP1R35-BirAFlag	NP_733468.2	CASC5	2|3|8|8|32|27|15|19|3|5|7|6	19|19|19|16	73	18.25	0	0.62	0.93
PPP1R35-BirAFlag	NP_005906.2	MCM6	16|12|24|28|37|36|25|24|20|20|20|21	43|44|23|21	131	32.75	0	0.9	0.93
PPP1R35-BirAFlag	NP_071936.2	SUDS3	0|0|0|0|3|0|0|0|3|4|0|3	4|6|5|7	22	5.5	0	1.57	0.74
PPP1R35-BirAFlag	NP_054892.2	BABAM1	0|0|0|3|3|4|11|4|0|0|0|2	5|3|2|0	10	2.5	0	0.33	0.89
PPP1R35-BirAFlag	NP_055238.1	AFF4	0|0|0|0|3|3|23|24|4|6|3|6	7|6|6|2	21	5.25	0	0.22	0.94
PPP1R35-BirAFlag	NP_055111.1	CAPN7	0|0|0|0|0|0|0|0|0|0|0|0	2|0|0|0	2	0.5	0.19	5	0.55
PPP1R35-BirAFlag	NP_055140.1	CORO1C	28|32|86|85|35|37|45|51|61|39|62|66	28|33|31|27	119	29.75	0	0.35	0.94
PPP1R35-BirAFlag	NP_055121.1	C22orf28	22|18|33|37|28|30|34|35|32|25|31|34	27|21|18|22	88	22	0	0.61	0.94
PPP1R35-BirAFlag	NP_055054.1	EIF2B2	0|0|5|6|0|0|3|3|0|0|4|6	5|7|2|3	17	4.25	0	0.71	0.85
PPP1R35-BirAFlag	NP_055288.1	DIMT1	2|4|8|3|2|4|5|4|2|0|0|0	7|5|3|4	19	4.75	0	0.73	0.86
PPP1R35-BirAFlag	NP_055082.1	C11orf58	2|0|5|3|6|9|29|31|12|11|15|13	13|11|3|0	27	6.75	0	0.23	0.94
PPP1R35-BirAFlag	NP_055847.1	PDS5B	0|0|4|0|0|0|9|9|4|4|3|5	3|3|0|0	6	1.5	0	0.17	0.94
PPP1R35-BirAFlag	NP_055055.1	LIMD1	3|2|5|3|4|5|8|7|6|9|9|12	8|8|10|8	34	8.5	0	0.81	0.9
PPP1R35-BirAFlag	NP_055398.1	LMCD1	0|0|0|5|0|0|18|22|8|9|15|17	7|6|0|0	13	3.25	0	0.16	0.94
PPP1R35-BirAFlag	NP_055278.1	LSM3	0|0|17|4|4|0|12|14|6|6|7|11	5|4|15|5	29	7.25	0	0.47	0.92
PPP1R35-BirAFlag	NP_055331.1	CNOT3	3|3|3|0|3|3|6|7|0|0|0|0	8|10|6|6	30	7.5	0	1.15	0.83
PPP1R35-BirAFlag	NP_055706.1	PDAP1	11|12|21|23|25|25|54|50|36|42|49|46	35|33|14|16	98	24.5	0	0.47	0.94
PPP1R35-BirAFlag	NP_055362.1	TMOD3	2|0|4|7|3|7|14|12|0|0|0|0	11|8|16|12	47	11.75	0	0.9	0.9
PPP1R35-BirAFlag	NP_056200.1	SORBS1	0|0|0|2|0|0|7|8|0|0|4|4	3|7|4|0	14	3.5	0	0.47	0.88
PPP1R35-BirAFlag	NP_055690.1	KIF14	0|2|3|2|4|6|5|7|0|3|5|3	9|7|7|9	32	8	0	1.23	0.83
PPP1R35-BirAFlag	NP_055629.1	PSMD6	7|3|13|10|8|9|10|11|4|4|8|8	9|9|7|5	30	7.5	0	0.62	0.91
PPP1R35-BirAFlag	NP_055555.1	EIF4A3	15|15|28|30|27|28|26|27|13|7|11|12	35|32|7|10	84	21	0	0.72	0.93
PPP1R35-BirAFlag	NP_055814.1	RAB21	0|0|3|5|0|0|0|0|0|0|3|0	2|0|5|5	12	3	0	0.75	0.8
PPP1R35-BirAFlag	NP_055464.1	SAFB2	2|5|10|14|9|16|22|19|7|9|19|20	8|8|6|5	27	6.75	0	0.32	0.94
PPP1R35-BirAFlag	NP_055545.1	MLEC	0|0|0|0|0|0|0|0|0|0|0|0	4|0|0|0	4	1	0.25	10	0.45
PPP1R35-BirAFlag	NP_055448.1	CTR9	0|0|2|0|0|0|3|3|6|4|7|8	2|0|0|9	11	2.75	0	0.37	0.86
PPP1R35-BirAFlag	NP_055521.1	SART3	11|11|18|18|42|41|48|51|14|9|15|12	46|42|34|30	152	38	0	0.77	0.94
PPP1R35-BirAFlag	NP_055523.1	KNTC1	2|2|8|10|9|11|0|0|0|0|0|6	6|4|0|7	17	4.25	0	0.4	0.91
PPP1R35-BirAFlag	NP_055541.1	TBKBP1	0|0|0|0|0|0|0|0|0|0|0|0	3|0|4|3	10	2.5	0.72	25	0.1
PPP1R35-BirAFlag	NP_006819.2	ASCC3	9|12|17|20|43|37|20|17|19|18|37|27	19|21|30|29	99	24.75	0	0.62	0.94
PPP1R35-BirAFlag	NP_057226.1	HSD17B12	14|8|13|16|9|12|13|12|11|12|10|9	19|21|10|12	62	15.5	0	1.03	0.9
PPP1R35-BirAFlag	NP_057568.1	PDZD11	0|0|0|0|0|0|0|0|2|0|0|0	6|0|4|0	10	2.5	0.17	2.5	0.62
PPP1R35-BirAFlag	NP_057018.1	NOP58	9|10|29|30|28|22|36|29|14|10|33|30	22|23|18|12	75	18.75	0	0.54	0.94
PPP1R35-BirAFlag	NP_057123.1	C14orf166	0|3|17|14|20|21|20|20|16|13|20|20	16|13|15|8	52	13	0	0.63	0.93
PPP1R35-BirAFlag	NP_057131.1	SF3B14	5|5|9|9|14|13|18|21|6|13|13|9	16|13|8|7	44	11	0	0.56	0.93
PPP1R35-BirAFlag	NP_057141.1	COPZ1	4|0|4|3|6|4|8|8|5|2|2|3	6|6|0|2	14	3.5	0	0.44	0.89
PPP1R35-BirAFlag	NP_057143.1	PPIL1	2|2|0|3|4|4|10|12|4|8|4|9	7|8|0|3	18	4.5	0	0.41	0.91
PPP1R35-BirAFlag	NP_057179.1	GINS2	0|0|0|0|0|0|12|10|8|0|7|9	13|14|4|3	34	8.5	0	0.77	0.89
PPP1R35-BirAFlag	NP_057291.1	CPSF3	18|21|30|39|45|45|30|29|24|23|35|31	53|51|55|43	202	50.5	0	1.12	0.94
PPP1R35-BirAFlag	NP_057396.1	WBP11	2|0|4|3|0|0|8|10|0|5|4|0	8|8|7|5	28	7	0	0.78	0.89
PPP1R35-BirAFlag	NP_057308.1	SNX9	9|5|18|9|16|12|35|30|19|21|24|30	8|9|0|0	17	4.25	0	0.13	0.94
PPP1R35-BirAFlag	NP_055205.2	SND1	32|41|64|74|58|62|91|91|61|58|75|90	78|76|38|47	239	59.75	0	0.66	0.94
PPP1R35-BirAFlag	NP_005024.2	EXOSC9	0|3|0|0|5|0|11|13|3|6|6|3	13|10|8|6	37	9.25	0	0.77	0.9
PPP1R35-BirAFlag	NP_061989.2	UBFD1	20|26|42|29|45|43|12|13|5|0|7|0	17|14|6|3	40	10	0	0.23	0.94
PPP1R35-BirAFlag	NP_003964.3	RPL14	5|5|7|0|13|9|26|21|13|14|8|0	13|15|0|7	35	8.75	0	0.37	0.93
PPP1R35-BirAFlag	NP_009166.2	XPOT	9|11|25|30|10|14|4|5|6|9|15|14	16|21|16|17	70	17.5	0	0.64	0.93
PPP1R35-BirAFlag	NP_001028755.2	ACOT9	0|0|5|10|0|0|3|0|2|0|6|4	4|5|0|2	11	2.75	0	0.34	0.9
PPP1R35-BirAFlag	NP_004318.3	BCR	0|0|7|4|4|4|4|3|3|0|6|0	7|4|12|7	30	7.5	0	1.15	0.79
PPP1R35-BirAFlag	NP_004277.2	GTPBP1	5|0|4|6|0|8|14|12|7|10|11|10	14|10|7|5	36	9	0	0.69	0.91
PPP1R35-BirAFlag	NP_003749.2	EIF3J	0|0|2|3|7|7|16|15|3|4|5|4	9|6|2|2	19	4.75	0	0.31	0.92
PPP1R35-BirAFlag	NP_112601.3	CPVL	3|4|15|18|23|22|12|9|12|16|21|21	10|11|0|0	21	5.25	0	0.23	0.94
PPP1R35-BirAFlag	NP_005877.2	KATNB1	0|0|0|3|0|2|13|9|0|3|10|8	10|3|4|0	17	4.25	0	0.37	0.91
PPP1R35-BirAFlag	NP_037374.1	C16orf80	0|0|4|4|5|3|11|8|3|3|5|8	5|5|0|3	13	3.25	0	0.34	0.91
PPP1R35-BirAFlag	NP_659400.2	FAM91A1	4|3|12|7|10|10|4|7|8|6|12|11	7|11|14|16	48	12	0	1	0.89
PPP1R35-BirAFlag	NP_056988.3	EIF5B	10|12|17|17|17|20|24|23|19|15|23|26	9|10|13|11	43	10.75	0	0.43	0.94
PPP1R35-BirAFlag	NP_005379.3	PDCL	2|0|4|3|0|0|11|12|9|16|17|14	16|14|11|10	51	12.75	0	0.77	0.92
PPP1R35-BirAFlag	NP_001026873.2	C3orf75	13|12|16|18|23|16|25|22|18|20|16|16	19|19|20|19	77	19.25	0	0.8	0.93
PPP1R35-BirAFlag	NP_060504.1	WDR70	3|6|9|11|17|15|64|69|30|25|37|35	32|36|6|5	79	19.75	0	0.3	0.94
PPP1R35-BirAFlag	NP_060517.1	RBM22	0|0|0|0|0|0|8|6|0|0|0|0	3|5|0|0	8	2	0	0.29	0.89
PPP1R35-BirAFlag	NP_060315.1	COMMD8	0|3|7|4|3|5|5|6|13|17|16|18	8|7|5|7	27	6.75	0	0.39	0.94
PPP1R35-BirAFlag	NP_060386.1	PIH1D1	11|15|22|27|21|22|21|21|9|14|12|13	33|30|22|19	104	26	0	1.06	0.92
PPP1R35-BirAFlag	NP_061156.1	CMAS	2|2|0|0|6|4|9|11|2|3|3|5	4|3|0|0	7	1.75	0	0.17	0.91
PPP1R35-BirAFlag	NP_064709.2	CIAPIN1	6|3|7|7|13|13|18|15|11|14|20|24	9|10|2|5	26	6.5	0	0.3	0.94
PPP1R35-BirAFlag	NP_037535.2	STRN4	0|0|0|0|0|0|9|8|4|5|5|4	13|12|7|8	40	10	0	1.18	0.85
PPP1R35-BirAFlag	NP_061913.3	ELP4	2|4|20|17|9|10|18|11|10|14|34|25	11|11|14|15	51	12.75	0	0.43	0.94
PPP1R35-BirAFlag	NP_072096.2	GIGYF1	0|0|0|0|0|0|0|0|0|0|0|0	3|0|0|0	3	0.75	0.24	7.5	0.49
PPP1R35-BirAFlag	NP_004990.3	MYO6	7|7|9|11|30|24|26|26|0|4|4|8	6|5|10|6	27	6.75	0	0.24	0.94
PPP1R35-BirAFlag	NP_055870.2	SWAP70	5|6|14|10|4|9|15|14|7|10|20|21	3|5|0|0	8	2	0	0.1	0.94
PPP1R35-BirAFlag	NP_996790.3	PRKAA1	6|4|7|7|7|5|6|8|4|0|3|7	6|7|6|5	24	6	0	0.8	0.88
PPP1R35-BirAFlag	NP_038203.2	IARS	17|14|55|54|47|52|30|28|15|26|33|27	24|24|17|17	82	20.5	0	0.38	0.94
PPP1R35-BirAFlag	NP_149124.3	CNP	0|0|0|0|0|3|3|0|3|0|6|2	3|0|0|0	3	0.75	0	0.17	0.85
PPP1R35-BirAFlag	NP_001035700.1	EFTUD1	0|0|4|5|0|0|10|11|2|5|11|11	6|3|2|0	11	2.75	0	0.25	0.91
PPP1R35-BirAFlag	NP_061910.1	EXOSC4	0|0|6|5|8|9|12|13|10|15|13|14	8|10|18|16	52	13	0	0.9	0.9
PPP1R35-BirAFlag	NP_004738.3	DLG5	0|0|0|0|4|2|0|0|2|0|0|0	15|13|17|19	64	16	0.99	5.33	0
PPP1R35-BirAFlag	NP_060191.3	CC2D1A	2|2|7|3|3|6|20|19|7|3|11|14	19|19|12|14	64	16	0	0.82	0.92
PPP1R35-BirAFlag	NP_005325.2	HCFC1	35|38|98|85|96|101|89|87|60|60|95|86	58|62|64|53	237	59.25	0	0.6	0.94
PPP1R35-BirAFlag	NP_064628.1	TOMM22	5|0|22|26|17|18|20|24|19|27|31|22	37|34|26|24	121	30.25	0	1.04	0.93
PPP1R35-BirAFlag	NP_065147.1	DDX24	0|0|0|0|2|0|3|0|0|0|3|0	4|7|2|0	13	3.25	0.01	1.08	0.72
PPP1R35-BirAFlag	NP_065090.1	PCNP	6|5|3|5|12|9|32|29|22|29|18|20	16|14|0|0	30	7.5	0	0.25	0.94
PPP1R35-BirAFlag	NP_065134.1	NUP107	0|3|5|5|12|11|12|12|0|4|4|0	25|21|19|18	83	20.75	0	1.73	0.81
PPP1R35-BirAFlag	NP_085911.2	DDX11	0|0|0|0|0|0|0|0|0|0|0|0	4|7|3|0	14	3.5	0.73	35	0.09
PPP1R35-BirAFlag	NP_003751.2	EIF4G3	11|11|23|33|46|46|42|44|21|18|25|37	30|37|39|38	144	36	0	0.78	0.94
PPP1R35-BirAFlag	NP_060421.2	SMPD4	0|0|0|0|0|0|0|0|0|0|0|0	4|3|3|4	14	3.5	0.97	35	0.01
PPP1R35-BirAFlag	NP_066407.1	HIST1H2BD	40|52|94|90|102|17|91|12|53|53|69|68	13|13|50|43	119	29.75	0	0.3	0.94
PPP1R35-BirAFlag	NP_066406.1	HIST1H2BB	40|52|94|89|101|18|85|15|52|53|70|69	13|13|52|45	123	30.75	0	0.32	0.94
PPP1R35-BirAFlag	NP_001322.1	CTNND1	0|2|8|5|5|6|26|17|8|7|12|16	12|11|11|11	45	11.25	0	0.52	0.93
PPP1R35-BirAFlag	NP_001655.1	RHOA	0|0|2|2|3|4|14|13|0|0|3|3	7|7|0|0	14	3.5	0	0.26	0.92
PPP1R35-BirAFlag	NP_003482.1	NAA10	0|0|4|0|7|5|11|7|0|0|0|5	7|5|3|3	18	4.5	0	0.5	0.9
PPP1R35-BirAFlag	NP_002511.1	NPM1	58|55|136|116|93|88|142|160|121|124|153|219	92|91|90|89	362	90.5	0	0.48	0.94
PPP1R35-BirAFlag	NP_066565.1	NMT1	11|9|30|17|2|0|17|15|23|31|53|59	12|13|11|12	48	12	0	0.21	0.94
PPP1R35-BirAFlag	NP_066953.1	PPIA	4|0|7|6|15|12|15|19|6|8|10|7	11|14|7|6	38	9.5	0	0.56	0.92
PPP1R35-BirAFlag	NP_067058.1	EPS15L1	81|83|159|124|145|138|101|95|68|94|126|112	69|67|75|66	277	69.25	0	0.46	0.94
PPP1R35-BirAFlag	NP_067075.1	RAB18	0|0|0|3|0|0|12|11|2|3|7|5	10|10|0|0	20	5	0	0.43	0.91
PPP1R35-BirAFlag	NP_055627.2	CEP170	38|45|76|60|123|116|112|119|47|54|53|55	75|70|54|55	254	63.5	0	0.52	0.94
PPP1R35-BirAFlag	NP_001035918.1	MST4	0|0|0|0|0|0|0|0|0|0|4|7	3|3|0|0	6	1.5	0	0.27	0.87
PPP1R35-BirAFlag	NP_001035982.1	DIAPH3	0|0|0|5|4|2|3|3|0|0|3|0	4|2|7|0	13	3.25	0	0.72	0.79
PPP1R35-BirAFlag	NP_036347.1	MGEA5	3|0|3|9|13|8|16|13|11|6|17|11	17|19|17|20	73	18.25	0	1.11	0.91
PPP1R35-BirAFlag	NP_055799.2	AZI1	0|0|0|0|0|0|0|0|0|0|0|0	4|2|6|6	18	4.5	0.93	45	0.01
PPP1R35-BirAFlag	NP_003277.1	TOP1	7|6|11|6|21|19|19|12|0|4|0|0	16|12|0|2	30	7.5	0	0.38	0.93
PPP1R35-BirAFlag	NP_006314.2	SEC24B	0|0|2|5|2|0|10|11|8|5|7|7	3|4|2|0	9	2.25	0	0.21	0.94
PPP1R35-BirAFlag	NP_001036214.1	STAG2	0|0|7|8|0|0|13|13|11|10|16|20	5|4|6|2	17	4.25	0	0.24	0.94
PPP1R35-BirAFlag	NP_001026855.2	TP53BP2	7|3|22|16|29|28|36|30|10|10|16|19	36|34|29|33	132	33	0	1	0.93
PPP1R35-BirAFlag	NP_001037770.1	SMAP1	5|5|8|6|11|11|8|9|10|11|7|9	5|6|4|5	20	5	0	0.45	0.94
PPP1R35-BirAFlag	NP_002065.1	GNB1	0|0|0|0|0|0|8|8|6|5|4|0	8|5|0|0	13	3.25	0	0.41	0.88
PPP1R35-BirAFlag	NP_002618.1	PFKP	15|13|20|28|18|17|24|24|19|15|16|15	14|15|6|6	41	10.25	0	0.39	0.94
PPP1R35-BirAFlag	NP_004228.1	TRIP13	8|11|13|12|8|5|8|7|12|11|9|9	18|13|4|4	39	9.75	0	0.78	0.89
PPP1R35-BirAFlag	NP_065971.2	CHD8	7|3|9|12|38|21|23|19|11|18|14|23	25|20|48|44	137	34.25	0	1.12	0.92
PPP1R35-BirAFlag	NP_005442.2	PDLIM7	0|0|0|3|0|0|9|12|9|6|6|9	7|7|2|4	20	5	0	0.48	0.91
PPP1R35-BirAFlag	NP_004680.2	MTA1	11|11|23|20|22|20|29|27|15|17|30|26	26|25|32|30	113	28.25	0	0.96	0.93
PPP1R35-BirAFlag	NP_065795.1	MTA3	0|0|0|0|0|0|5|5|0|0|0|0	3|4|0|0	7	1.75	0	0.35	0.85
PPP1R35-BirAFlag	NP_001447.2	FLNA	721|702|1231|1221|1560|1540|1300|1314|734|771|1112|1073	808|798|771|825	3202	800.5	0	0.52	0.94
PPP1R35-BirAFlag	NP_001448.2	FLNB	110|111|153|167|181|184|89|82|111|118|146|148	64|67|68|95	294	73.5	0	0.4	0.94
PPP1R35-BirAFlag	NP_689971.4	YTHDF3	0|4|4|3|0|0|7|5|3|4|7|4	15|16|8|9	48	12	0	1.71	0.74
PPP1R35-BirAFlag	NP_060268.2	YTHDF1	3|0|5|3|8|6|10|10|9|7|4|9	17|13|9|7	46	11.5	0	1.15	0.85
PPP1R35-BirAFlag	NP_057342.2	YTHDF2	5|6|9|8|12|9|8|9|9|11|11|10	6|10|15|14	45	11.25	0	0.98	0.89
PPP1R35-BirAFlag	NP_006631.2	2009-09-01	9|5|30|30|38|35|29|27|7|11|27|30	26|21|20|17	84	21	0	0.58	0.94
PPP1R35-BirAFlag	NP_036442.3	KIF4A	5|5|5|14|30|28|51|42|17|18|15|18	15|15|7|9	46	11.5	0	0.25	0.94
PPP1R35-BirAFlag	NP_008985.3	KIF3A	0|0|0|0|0|0|0|0|0|0|0|0	4|6|5|3	18	4.5	0.98	45	0
PPP1R35-BirAFlag	NP_001032409.2	CYFIP2	6|7|14|12|11|10|14|13|12|16|11|16	4|4|0|10	18	4.5	0	0.28	0.94
PPP1R35-BirAFlag	NP_055423.1	CYFIP1	0|0|14|16|6|4|0|8|0|0|20|21	3|5|21|15	44	11	0	0.54	0.92
PPP1R35-BirAFlag	NP_783297.2	TJP1	14|19|31|33|66|70|58|63|25|26|40|35	80|76|49|45	250	62.5	0	0.92	0.94
PPP1R35-BirAFlag	NP_112604.2	HNRNPC	16|22|31|30|39|39|38|41|25|23|26|19	30|31|18|16	95	23.75	0	0.59	0.94
PPP1R35-BirAFlag	NP_057106.2	APH1A	0|0|0|0|0|0|0|0|0|0|0|0	3|0|0|0	3	0.75	0.24	7.5	0.49
PPP1R35-BirAFlag	NP_536350.2	GNAS	7|7|5|8|8|7|8|8|10|6|5|4	18|22|5|5	50	12.5	0	1.39	0.72
PPP1R35-BirAFlag	NP_001646.2	ARCN1	6|6|12|20|20|19|47|43|22|19|26|25	21|23|14|11	69	17.25	0	0.38	0.94
PPP1R35-BirAFlag	NP_000523.2	PCCB	162|174|336|334|338|344|116|118|92|83|105|92	210|194|174|184	762	190.5	0	0.56	0.94
PPP1R35-BirAFlag	NP_004915.2	ACTN4	15|12|46|34|38|33|31|33|14|14|21|17	35|23|21|23	102	25.5	0	0.61	0.94
PPP1R35-BirAFlag	NP_000537.3	TP53	6|4|7|8|32|34|5|5|5|5|5|0	9|10|7|5	31	7.75	0	0.23	0.94
PPP1R35-BirAFlag	NP_073153.1	ANAPC1	3|3|20|14|10|11|5|4|0|0|12|8	23|26|25|29	103	25.75	0	1.51	0.89
PPP1R35-BirAFlag	NP_003579.3	CUL4B	6|8|11|17|19|17|41|37|9|18|29|27	9|9|3|2	23	5.75	0	0.15	0.94
PPP1R35-BirAFlag	NP_689419.2	SNX6	2|0|0|3|0|0|13|13|2|3|11|7	15|17|4|2	38	9.5	0	0.73	0.9
PPP1R35-BirAFlag	NP_001008895.1	CUL4A	0|0|8|10|11|9|14|12|0|0|15|15	5|3|0|0	8	2	0	0.13	0.94
PPP1R35-BirAFlag	NP_002464.1	MYH9	17|14|55|49|42|41|54|62|11|19|20|35	19|13|23|20	75	18.75	0	0.32	0.94
PPP1R35-BirAFlag	NP_056480.1	AAAS	3|2|2|0|0|0|0|0|0|0|2|0	3|3|0|0	6	1.5	0	0.6	0.77
PPP1R35-BirAFlag	NP_073716.1	SNRPN	7|7|14|17|13|12|16|13|11|10|15|16	17|19|15|20	71	17.75	0	1.08	0.91
PPP1R35-BirAFlag	NP_056257.1	CNOT10	0|0|7|9|4|7|11|10|4|5|6|5	25|20|27|22	94	23.5	0.02	2.24	0.68
PPP1R35-BirAFlag	NP_075408.1	DCTN1	12|10|21|15|25|32|29|28|9|20|15|19	15|13|13|12	53	13.25	0	0.43	0.94
PPP1R35-BirAFlag	NP_002219.1	JUN	0|0|0|0|0|0|15|15|0|0|2|2	21|19|0|0	40	10	0	0.67	0.9
PPP1R35-BirAFlag	NP_079345.1	ZNF703	0|0|0|0|0|0|0|0|0|0|0|0	2|0|0|0	2	0.5	0.19	5	0.55
PPP1R35-BirAFlag	NP_071334.1	EGLN1	0|0|0|0|3|0|4|2|0|0|2|0	3|3|0|0	6	1.5	0	0.43	0.81
PPP1R35-BirAFlag	NP_055491.1	PUM1	0|3|4|5|4|6|9|6|3|5|5|6	17|12|7|4	40	10	0	1.33	0.75
PPP1R35-BirAFlag	NP_112182.1	ANP32E	5|4|4|4|0|0|11|17|19|19|31|35	8|7|2|3	20	5	0	0.15	0.94
PPP1R35-BirAFlag	NP_112197.1	TSC22D4	0|0|0|0|0|0|0|0|0|0|0|0	3|0|0|0	3	0.75	0.24	7.5	0.49
PPP1R35-BirAFlag	NP_008835.5	PRKDC	80|83|192|190|153|143|98|103|81|92|135|137	174|178|141|143	636	159	0	0.83	0.94
PPP1R35-BirAFlag	NP_112483.1	LAS1L	5|2|3|2|7|5|13|11|5|9|7|10	12|13|6|7	38	9.5	0	0.79	0.9
PPP1R35-BirAFlag	NP_054829.2	PPP1R8	0|0|0|0|0|0|9|4|5|0|10|8	11|11|4|5	31	7.75	0	0.82	0.88
PPP1R35-BirAFlag	NP_075447.1	WHSC1L1	0|0|0|0|8|5|12|14|5|3|0|0	10|8|5|0	23	5.75	0	0.44	0.91
PPP1R35-BirAFlag	NP_036369.2	SIRT2	0|0|0|0|0|0|0|0|0|0|0|0	27|31|26|16	100	25	1	250	0
PPP1R35-BirAFlag	NP_112420.1	HNRNPA1	25|29|39|46|59|57|68|89|47|41|58|47	76|71|41|33	221	55.25	0	0.7	0.94
PPP1R35-BirAFlag	NP_112533.1	HNRNPA2B1	18|20|42|33|87|87|107|120|39|45|54|41	65|69|24|25	183	45.75	0	0.4	0.94
PPP1R35-BirAFlag	NP_004492.2	HNRNPU	77|69|82|96|110|99|122|114|91|94|100|95	105|101|75|65	346	86.5	0	0.73	0.94
PPP1R35-BirAFlag	NP_005007.2	PCBP2	12|18|38|35|28|27|27|24|31|36|43|43	43|43|33|22	141	35.25	0	0.82	0.94
PPP1R35-BirAFlag	NP_006187.2	PCBP1	10|10|25|26|33|27|45|41|35|41|58|51	38|38|20|23	119	29.75	0	0.55	0.94
PPP1R35-BirAFlag	NP_006304.1	USP15	31|33|65|60|86|84|81|76|34|41|51|47	92|92|67|61	312	78	0	0.92	0.94
PPP1R35-BirAFlag	NP_114367.1	PTBP1	15|18|82|62|67|55|38|43|50|55|76|93	41|43|52|50	186	46.5	0	0.53	0.94
PPP1R35-BirAFlag	NP_116189.1	C1orf198	2|0|3|4|10|9|42|40|7|6|10|12	40|35|0|0	75	18.75	0	0.46	0.94
PPP1R35-BirAFlag	NP_116294.1	RBM17	5|9|15|14|23|25|45|45|16|16|15|24	20|17|7|7	51	12.75	0	0.28	0.94
PPP1R35-BirAFlag	NP_001034679.2	USP9X	0|0|2|3|3|0|12|8|7|6|6|13	18|15|13|16	62	15.5	0	1.24	0.89
PPP1R35-BirAFlag	NP_060609.2	DNAAF2	0|0|0|0|4|0|6|7|2|4|11|10	4|4|0|0	8	2	0	0.19	0.91
PPP1R35-BirAFlag	NP_127492.1	GTF2I	11|11|13|6|22|17|32|32|19|28|24|19	30|34|25|24	113	28.25	0	0.88	0.93
PPP1R35-BirAFlag	NP_054720.1	GGA3	3|3|4|5|3|6|9|12|12|9|9|12	9|6|6|4	25	6.25	0	0.52	0.91
PPP1R35-BirAFlag	NP_078873.2	MAP7D3	5|4|8|8|43|40|32|31|12|12|12|14	34|26|16|15	91	22.75	0	0.55	0.94
PPP1R35-BirAFlag	NP_853530.2	CUX1	0|0|6|4|5|9|13|11|2|6|10|10	8|6|11|8	33	8.25	0	0.69	0.91
PPP1R35-BirAFlag	NP_001091742.1	HMGCS1	0|0|0|0|0|0|0|0|0|0|0|0	3|4|0|0	7	1.75	0.48	17.5	0.32
PPP1R35-BirAFlag	NP_001011553.2	2007-09-01	7|8|21|16|30|25|40|33|7|9|12|13	24|23|15|11	73	18.25	0	0.5	0.94
PPP1R35-BirAFlag	NP_060713.1	2011-09-01	7|7|10|11|30|20|29|24|12|11|10|13	22|21|9|9	61	15.25	0	0.52	0.93
PPP1R35-BirAFlag	NP_001092282.1	2008-09-01	0|0|0|0|5|4|3|4|0|0|0|0	6|4|0|2	12	3	0	0.67	0.81
PPP1R35-BirAFlag	NP_001896.2	CTPS	27|33|75|86|55|52|67|72|53|65|99|93	48|41|42|41	172	43	0	0.45	0.94
PPP1R35-BirAFlag	NP_055903.2	TNRC6B	0|0|6|3|20|15|15|21|0|3|7|6	42|38|28|29	137	34.25	0	1.67	0.86
PPP1R35-BirAFlag	NP_055309.2	TNRC6A	0|0|0|0|10|10|0|2|0|0|0|0	12|17|29|30	88	22	0.44	2.2	0.36
PPP1R35-BirAFlag	NP_001091896.1	SMARCD2	0|0|0|0|0|0|0|0|0|0|0|0	2|0|0|0	2	0.5	0.19	5	0.55
PPP1R35-BirAFlag	NP_004078.2	DLG1	0|6|7|7|14|10|30|33|7|5|6|6	14|16|0|0	30	7.5	0	0.24	0.94
PPP1R35-BirAFlag	NP_001658.2	ARL2	2|5|7|5|2|0|0|3|8|7|5|7	5|4|6|8	23	5.75	0	0.77	0.87
PPP1R35-BirAFlag	NP_001091974.1	DDX17	35|39|82|70|82|74|86|73|60|59|63|73	91|87|54|54	286	71.5	0	0.85	0.94
PPP1R35-BirAFlag	NP_001180345.1	DDX3X	33|35|77|65|61|54|103|100|67|88|117|107	100|93|92|89	374	93.5	0	0.83	0.94
PPP1R35-BirAFlag	NP_004387.1	DDX5	37|37|77|75|74|71|84|87|56|57|101|83	80|78|77|80	315	78.75	0	0.84	0.94
PPP1R35-BirAFlag	NP_277071.2	CDK11A	4|4|14|10|13|9|0|0|0|0|19|0	14|13|12|13	52	13	0	0.79	0.92
PPP1R35-BirAFlag	NP_001020.2	RPS26	0|0|0|0|10|14|12|12|5|7|0|0	13|12|10|12	47	11.75	0	0.9	0.91
PPP1R35-BirAFlag	NP_006258.3	RANBP2	76|115|135|144|329|249|253|248|140|138|148|145	440|432|338|329	1539	384.75	0	1.32	0.94
PPP1R35-BirAFlag	NP_001116835.1	RGPD6	0|0|0|0|0|0|0|0|0|0|0|0	10|11|14|12	47	11.75	1	117.5	0
PPP1R35-BirAFlag	NP_001092693.1	IFT74	0|4|4|0|4|3|12|12|2|2|3|4	15|13|8|7	43	10.75	0	0.9	0.89
PPP1R35-BirAFlag	NP_653210.2	CCDC43	7|6|17|13|12|12|24|22|30|29|37|44	10|11|9|10	40	10	0	0.25	0.94
PPP1R35-BirAFlag	NP_938074.2	PRMT1	4|7|12|13|11|8|17|15|12|17|19|28	20|23|19|12	74	18.5	0	0.79	0.93
PPP1R35-BirAFlag	NP_149130.1	CALD1	19|16|21|22|33|26|60|55|30|25|24|22	27|34|13|16	90	22.5	0	0.39	0.94
PPP1R35-BirAFlag	NP_001017963.2	HSP90AA1	43|51|66|64|75|68|62|63|35|31|43|43	146|149|75|32	402	100.5	0	1.41	0.92
PPP1R35-BirAFlag	NP_005900.2	MAP1B	32|46|110|103|170|155|119|116|38|30|62|54	26|30|20|28	104	26	0	0.16	0.94
PPP1R35-BirAFlag	NP_000966.2	RPL11	8|9|13|11|20|18|14|15|11|7|16|12	18|17|7|6	48	12	0	0.63	0.92
PPP1R35-BirAFlag	NP_002939.2	RPL15	15|10|16|18|41|39|26|21|19|14|20|19	36|32|24|24	116	29	0	0.72	0.94
PPP1R35-BirAFlag	NP_150254.1	RPL13	7|5|11|13|29|29|16|16|10|8|6|12	27|20|11|9	67	16.75	0	0.58	0.93
PPP1R35-BirAFlag	NP_006353.2	NXF1	2|3|14|11|9|9|14|14|5|8|14|12	19|19|3|3	44	11	0	0.79	0.9
PPP1R35-BirAFlag	NP_001094289.1	MOB4	0|0|0|0|0|0|11|13|0|0|0|0	14|12|0|0	26	6.5	0	0.54	0.9
PPP1R35-BirAFlag	NP_001143.2	SLC25A5	22|36|50|49|42|48|59|66|53|57|47|47	98|108|61|61	328	82	0	1.31	0.93
PPP1R35-BirAFlag	NP_001627.2	SLC25A6	2|8|18|14|11|18|32|31|16|21|26|22	37|37|19|24	117	29.25	0	0.93	0.93
PPP1R35-BirAFlag	NP_001142.2	SLC25A4	7|0|4|11|11|0|0|2|4|0|0|0	10|10|5|4	29	7.25	0	0.66	0.9
PPP1R35-BirAFlag	NP_000916.2	PDHB	2|5|2|3|2|0|0|4|5|5|5|9	8|6|0|4	18	4.5	0	0.64	0.86
PPP1R35-BirAFlag	NP_001096137.1	PSMA4	0|2|0|4|5|6|9|7|4|3|4|0	9|7|0|0	16	4	0	0.5	0.87
PPP1R35-BirAFlag	NP_001096616.1	GIGYF2	22|18|39|32|55|52|21|22|22|23|30|24	63|58|89|91	301	75.25	0	1.41	0.93
PPP1R35-BirAFlag	NP_000996.2	RPS3	63|62|74|75|120|114|120|112|78|78|72|75	150|143|87|90	470	117.5	0	0.98	0.94
PPP1R35-BirAFlag	NP_005069.2	TLE3	0|2|0|0|4|4|6|8|0|2|0|2	8|5|2|2	17	4.25	0	0.61	0.86
PPP1R35-BirAFlag	NP_001098057.1	SLFN11	0|0|0|0|0|0|4|4|3|0|10|5	4|2|0|0	6	1.5	0	0.2	0.9
PPP1R35-BirAFlag	NP_001099000.1	CAP1	3|6|18|16|8|12|7|7|6|11|15|17	3|3|4|3	13	3.25	0	0.19	0.94
PPP1R35-BirAFlag	NP_006301.3	NPEPPS	9|11|19|21|10|12|9|11|16|16|22|18	32|29|17|12	90	22.5	0	1.05	0.91
PPP1R35-BirAFlag	NP_001104547.1	EZR	6|7|12|11|32|16|22|25|13|22|18|13	9|11|3|4	27	6.75	0	0.24	0.94
PPP1R35-BirAFlag	NP_001247421.1	RDX	7|4|6|16|13|14|21|19|9|0|0|0	8|8|6|4	26	6.5	0	0.33	0.94
PPP1R35-BirAFlag	NP_008938.2	CPSF6	13|11|24|20|27|25|72|60|21|21|30|38	40|39|15|20	114	28.5	0	0.43	0.94
PPP1R35-BirAFlag	NP_001106177.1	SCIN	3|0|8|14|10|10|88|78|55|72|80|79	43|36|27|19	125	31.25	0	0.37	0.94
PPP1R35-BirAFlag	NP_112196.3	TRMT1L	0|0|4|3|5|2|8|4|3|3|10|10	7|7|5|4	23	5.75	0	0.57	0.9
PPP1R35-BirAFlag	NP_001106207.1	FAM208A	3|4|8|13|12|12|15|10|6|9|7|9	8|10|11|9	38	9.5	0	0.68	0.92
PPP1R35-BirAFlag	NP_005689.2	SCAMP3	0|0|2|5|5|5|12|12|4|4|7|6	12|13|2|0	27	6.75	0	0.56	0.9
PPP1R35-BirAFlag	NP_001106849.1	FANCI	3|4|12|12|0|0|4|3|0|5|5|5	5|0|3|4	12	3	0	0.25	0.92
PPP1R35-BirAFlag	NP_005338.1	HSPA5	31|29|51|48|48|43|50|45|30|45|50|43	80|92|46|44	262	65.5	0	1.3	0.93
PPP1R35-BirAFlag	NP_001107018.1	LIMA1	12|8|19|14|19|19|33|26|15|12|17|21	5|7|9|7	28	7	0	0.24	0.94
PPP1R35-BirAFlag	NP_005337.2	HSPA1B	131|142|314|313|250|232|242|232|164|162|316|329	375|347|361|388	1471	367.75	0	1.14	0.94
PPP1R35-BirAFlag	NP_005518.3	HSPA1L	0|0|156|152|57|0|0|0|0|0|0|0	96|96|0|0	192	48	0	0.31	0.94
PPP1R35-BirAFlag	NP_444252.1	PFN2	0|0|2|2|15|13|0|0|0|0|0|0	8|10|0|0	18	4.5	0	0.32	0.92
PPP1R35-BirAFlag	NP_597680.2	ASNS	21|18|32|27|14|15|43|44|36|27|35|39	14|15|15|16	60	15	0	0.34	0.94
PPP1R35-BirAFlag	NP_919258.2	LIN54	0|0|0|0|0|0|5|5|0|0|3|7	6|6|3|4	19	4.75	0	0.79	0.85
PPP1R35-BirAFlag	NP_006274.2	TACC1	4|5|14|9|29|41|40|40|10|11|14|8	15|12|6|5	38	9.5	0	0.23	0.94
PPP1R35-BirAFlag	NP_001074324.1	PXN	2|2|8|5|7|7|7|6|0|0|7|8	6|4|0|3	13	3.25	0	0.41	0.89
PPP1R35-BirAFlag	NP_005681.2	DNM1L	10|13|43|40|12|12|8|8|10|11|24|25	9|13|20|14	56	14	0	0.34	0.94
PPP1R35-BirAFlag	NP_079170.2	NOL10	0|0|7|3|0|0|23|19|7|5|9|8	6|9|5|6	26	6.5	0	0.31	0.93
PPP1R35-BirAFlag	NP_476516.1	NAA15	4|2|3|4|8|6|11|18|8|6|4|8	8|8|3|0	19	4.75	0	0.33	0.92
PPP1R35-BirAFlag	NP_055096.2	PUF60	17|22|39|47|56|61|8|119|41|0|50|63	58|61|30|32	181	45.25	0	0.5	0.94
PPP1R35-BirAFlag	NP_490647.1	DNAJB6	0|3|3|6|6|7|5|5|4|2|3|0	10|9|5|6	30	7.5	0	1.15	0.82
PPP1R35-BirAFlag	NP_006442.2	PAIP1	3|6|6|5|4|4|14|10|7|7|11|9	10|9|0|0	19	4.75	0	0.38	0.91
PPP1R35-BirAFlag	NP_001231.2	CCNT1	4|3|9|11|8|9|20|20|7|6|17|14	15|15|8|11	49	12.25	0	0.61	0.93
PPP1R35-BirAFlag	NP_066299.2	MYL6	0|0|5|3|3|4|0|7|2|2|2|5	6|5|9|5	25	6.25	0	1.04	0.82
PPP1R35-BirAFlag	NP_001116827.1	PPP6C	3|2|13|13|9|5|12|12|7|8|12|13	15|20|17|13	65	16.25	0	1.25	0.88
PPP1R35-BirAFlag	NP_542414.1	PTPN13	7|11|21|21|33|47|20|21|14|14|23|16	48|41|32|38	159	39.75	0	0.99	0.93
PPP1R35-BirAFlag	NP_075068.2	NOL6	0|0|5|7|7|7|12|11|9|8|22|16	12|7|7|4	30	7.5	0	0.39	0.93
PPP1R35-BirAFlag	NP_078994.3	C9orf86	6|5|16|12|15|15|38|32|14|14|18|17	13|7|13|13	46	11.5	0	0.33	0.94
PPP1R35-BirAFlag	NP_001120662.1	CSK	0|2|6|4|3|4|9|5|6|0|3|4	10|8|0|0	18	4.5	0	0.6	0.86
PPP1R35-BirAFlag	NP_567824.1	DYRK1A	0|0|0|0|0|0|0|0|0|0|0|0	2|0|0|0	2	0.5	0.19	5	0.55
PPP1R35-BirAFlag	NP_001120683.1	KIAA1598	12|13|19|19|35|40|39|42|11|12|8|16	9|10|3|5	27	6.75	0	0.16	0.94
PPP1R35-BirAFlag	NP_001120982.1	APC	0|0|0|0|0|0|0|0|0|0|0|0	6|7|13|10	36	9	1	90	0
PPP1R35-BirAFlag	NP_001121599.1	GK	0|0|4|2|2|0|0|0|0|0|0|0	9|9|0|0	18	4.5	0.11	1.5	0.63
PPP1R35-BirAFlag	NP_057494.3	CHMP5	0|0|27|24|7|7|50|46|18|21|32|33	15|13|13|8	49	12.25	0	0.26	0.94
PPP1R35-BirAFlag	NP_003288.2	NR2C1	0|0|0|0|2|0|8|8|0|4|7|9	6|6|2|2	16	4	0	0.47	0.9
PPP1R35-BirAFlag	NP_055768.3	DIS3	4|4|9|8|9|11|12|13|14|14|14|9	11|8|0|4	23	5.75	0	0.41	0.92
PPP1R35-BirAFlag	NP_055842.2	PDXDC1	6|5|10|5|8|7|4|4|2|3|4|2	8|13|5|3	29	7.25	0	0.81	0.86
PPP1R35-BirAFlag	NP_055978.4	TRIM9	11|15|21|17|16|12|26|23|18|14|16|14	32|27|23|14	96	24	0	0.98	0.92
PPP1R35-BirAFlag	NP_001122316.1	SMARCA4	5|4|8|8|7|8|14|8|8|8|11|6	12|12|2|3	29	7.25	0	0.58	0.91
PPP1R35-BirAFlag	NP_001123291.1	CYB5R3	0|0|5|3|0|0|5|8|3|0|8|11	8|11|0|0	19	4.75	0	0.5	0.89
PPP1R35-BirAFlag	NP_055414.2	MAGED2	0|4|9|5|7|7|10|11|4|3|5|4	14|10|3|3	30	7.5	0	0.71	0.88
PPP1R35-BirAFlag	NP_008917.3	MAGED1	0|0|0|0|0|0|6|7|0|0|2|0	5|5|3|0	13	3.25	0	0.5	0.87
PPP1R35-BirAFlag	NP_002085.2	GSPT1	4|4|3|8|20|23|13|17|8|13|8|8	16|13|0|0	29	7.25	0	0.34	0.93
PPP1R35-BirAFlag	NP_892113.4	SHC1	0|0|0|6|0|0|11|8|0|3|7|5	9|11|5|5	30	7.5	0	0.79	0.89
PPP1R35-BirAFlag	NP_001123528.1	EEF1D	0|12|15|10|17|23|13|2|0|14|13|13	22|16|10|8	56	14	0	0.7	0.92
PPP1R35-BirAFlag	NP_598001.1	NEK7	0|0|0|0|2|0|0|3|0|0|0|0	4|0|0|0	4	1	0	0.4	0.76
PPP1R35-BirAFlag	NP_001123630.1	MYO1B	5|8|20|19|18|17|39|37|13|9|10|12	7|10|8|5	30	7.5	0	0.2	0.94
PPP1R35-BirAFlag	NP_001123999.1	SPAG9	15|12|26|29|46|41|35|37|12|11|24|16	12|16|25|22	75	18.75	0	0.43	0.94
PPP1R35-BirAFlag	NP_001124163.1	PPP3CA	3|4|2|0|0|2|8|0|0|0|0|0	8|11|0|4	23	5.75	0	0.96	0.79
PPP1R35-BirAFlag	NP_005596.2	PPP3CC	0|0|0|0|0|0|0|0|0|0|0|0	4|3|0|0	7	1.75	0.48	17.5	0.32
PPP1R35-BirAFlag	NP_001124192.1	AHCYL2	0|0|0|0|2|0|6|6|0|0|3|4	6|7|0|0	13	3.25	0	0.54	0.85
PPP1R35-BirAFlag	NP_006612.2	AHCYL1	6|4|4|2|0|5|5|5|8|7|5|11	2|5|3|10	20	5	0	0.53	0.89
PPP1R35-BirAFlag	NP_001124197.1	PSMB5	0|0|0|0|3|2|0|0|0|0|0|0	3|0|4|4	11	2.75	0	1.1	0.74
PPP1R35-BirAFlag	NP_570981.1	PPIL3	0|3|3|3|6|5|23|27|7|8|9|12	12|19|0|0	31	7.75	0	0.31	0.93
PPP1R35-BirAFlag	NP_001124435.1	TMEM194A	0|0|0|0|0|0|0|0|0|0|0|0	3|3|2|2	10	2.5	0.85	25	0.03
PPP1R35-BirAFlag	NP_001124488.1	CIZ1	0|0|0|0|3|2|17|18|9|4|7|9	5|4|4|4	17	4.25	0	0.24	0.94
PPP1R35-BirAFlag	NP_490597.1	BRD4	18|21|25|24|31|34|21|25|16|15|21|17	27|27|10|12	76	19	0	0.58	0.93
PPP1R35-BirAFlag	NP_550433.1	UNG	0|0|0|0|0|0|5|0|5|4|2|6	5|5|0|0	10	2.5	0	0.45	0.85
PPP1R35-BirAFlag	NP_001127836.1	MAP4	77|82|121|132|170|177|190|182|114|113|117|127	75|75|63|59	272	68	0	0.37	0.94
PPP1R35-BirAFlag	NP_001128145.1	NFIA	0|0|0|0|0|0|10|7|0|0|0|0	5|0|0|0	5	1.25	0	0.15	0.9
PPP1R35-BirAFlag	NP_001058.2	TOP2A	21|25|50|52|37|36|103|103|23|33|44|37	21|27|11|12	71	17.75	0	0.17	0.94
PPP1R35-BirAFlag	NP_001684.2	ATP6V1B2	3|4|12|16|0|0|9|10|5|9|12|12	5|0|8|8	21	5.25	0	0.38	0.92
PPP1R35-BirAFlag	NP_002709.2	PPP2R3A	0|0|0|0|0|0|0|0|0|0|0|0	2|0|2|0	4	1	0.37	10	0.38
PPP1R35-BirAFlag	NP_005403.2	SHMT2	2|5|15|11|8|7|7|5|5|10|11|8	22|18|3|5	48	12	0	0.92	0.87
PPP1R35-BirAFlag	NP_057406.2	RAB14	2|4|4|7|9|9|11|11|6|9|6|6	12|13|6|7	38	9.5	0	0.86	0.89
PPP1R35-BirAFlag	NP_112243.1	RAB1B	6|4|21|14|26|24|9|10|6|0|16|23	16|13|11|9	49	12.25	0	0.49	0.93
PPP1R35-BirAFlag	NP_002860.2	RAB6A	0|0|0|0|5|0|13|0|5|4|4|4	13|17|4|0	34	8.5	0	0.94	0.82
PPP1R35-BirAFlag	NP_001182257.1	RAB9A	0|0|3|4|0|0|11|7|4|0|11|8	8|9|2|3	22	5.5	0	0.5	0.91
PPP1R35-BirAFlag	NP_002861.1	RAB13	4|0|4|6|6|6|9|8|4|7|4|5	10|10|4|5	29	7.25	0	0.85	0.87
PPP1R35-BirAFlag	NP_001138430.1	EFCAB4B	0|0|0|0|0|0|0|0|0|0|0|0	5|4|0|0	9	2.25	0.5	22.5	0.27
PPP1R35-BirAFlag	NP_057215.3	RAB10	0|0|0|0|0|0|6|0|0|0|0|0	4|0|0|0	4	1	0	0.33	0.77
PPP1R35-BirAFlag	NP_004152.1	RAB1A	0|0|0|5|0|0|3|6|0|14|0|0	5|6|6|7	24	6	0	0.6	0.9
PPP1R35-BirAFlag	NP_005361.2	RAB8A	0|0|0|0|0|3|5|5|4|0|2|0	3|4|0|0	7	1.75	0	0.35	0.85
PPP1R35-BirAFlag	NP_061885.2	PLEKHA5	0|0|6|4|6|3|2|4|0|0|3|6	17|23|18|20	78	19.5	0.72	3.25	0.11
PPP1R35-BirAFlag	NP_061936.2	EML4	4|0|3|8|18|20|24|22|7|6|10|10	11|9|4|3	27	6.75	0	0.29	0.94
PPP1R35-BirAFlag	NP_003787.2	URI1	0|0|2|2|2|0|11|10|2|0|0|3	11|12|8|11	42	10.5	0	1	0.89
PPP1R35-BirAFlag	NP_004312.2	KIF1A	0|0|3|0|2|3|2|0|0|3|2|0	7|6|5|6	24	6	0.01	2	0.69
PPP1R35-BirAFlag	NP_904325.2	KIF1B	2|0|0|0|3|2|0|0|0|0|0|0	4|3|3|0	10	2.5	0	1	0.75
PPP1R35-BirAFlag	NP_006100.2	PRMT5	6|8|11|11|22|19|30|30|9|10|16|8	15|17|14|9	55	13.75	0	0.46	0.94
PPP1R35-BirAFlag	NP_006266.2	SRSF6	0|0|0|0|12|12|7|6|0|0|0|0	4|3|0|0	7	1.75	0	0.15	0.92
PPP1R35-BirAFlag	NP_057321.2	ANAPC5	0|0|6|5|5|4|0|0|3|3|10|8	8|6|28|30	72	18	0.49	2	0.3
PPP1R35-BirAFlag	NP_031381.2	HSP90AB1	68|74|101|97|109|102|99|95|55|62|79|78	223|210|116|81	630	157.5	0	1.49	0.93
PPP1R35-BirAFlag	NP_036272.2	SLC25A10	3|2|2|5|8|6|0|0|3|0|0|3	10|11|5|5	31	7.75	0	1.11	0.83
PPP1R35-BirAFlag	NP_057439.2	DDX47	11|11|10|9|8|6|4|6|7|6|7|6	12|10|8|7	37	9.25	0	0.84	0.9
PPP1R35-BirAFlag	NP_057227.2	NSFL1C	48|52|80|83|111|113|24|25|11|8|18|19	11|12|0|2	25	6.25	0	0.06	0.94
PPP1R35-BirAFlag	NP_077305.2	EFHD2	7|8|17|8|24|23|37|28|11|10|16|14	16|15|13|8	52	13	0	0.4	0.94
PPP1R35-BirAFlag	NP_079478.1	EFHD1	0|0|12|11|13|12|17|10|7|8|9|11	5|5|6|0	16	4	0	0.27	0.94
PPP1R35-BirAFlag	NP_613075.1	H2AFY	12|12|22|20|19|24|13|13|18|18|23|27	14|10|20|19	63	15.75	0	0.62	0.93
PPP1R35-BirAFlag	NP_005222.2	CTTN	55|48|73|74|85|91|114|114|62|60|65|64	89|89|41|33	252	63	0	0.55	0.94
PPP1R35-BirAFlag	NP_619541.1	H2AFV	0|0|0|0|0|0|0|0|0|0|0|0	7|0|0|0	7	1.75	0.25	17.5	0.43
PPP1R35-BirAFlag	NP_066390.1	HIST1H2AE	16|19|0|0|0|0|49|6|23|24|0|0	3|4|0|0	7	1.75	0	0.05	0.94
PPP1R35-BirAFlag	NP_002047.2	GFPT1	5|5|14|12|12|15|14|12|7|10|10|12	10|11|6|8	35	8.75	0	0.6	0.92
PPP1R35-BirAFlag	NP_068750.2	DHX35	0|0|2|0|0|0|10|8|0|4|2|2	9|10|17|11	47	11.75	0	1.31	0.81
PPP1R35-BirAFlag	NP_001128647.1	NEDD1	3|3|0|2|3|2|10|6|6|8|12|10	11|5|8|7	31	7.75	0	0.7	0.9
PPP1R35-BirAFlag	NP_001128716.1	TCOF1	12|17|13|21|41|43|77|76|27|31|33|30	32|28|15|15	90	22.5	0	0.29	0.94
PPP1R35-BirAFlag	NP_112598.2	EPPK1	4|5|13|11|4|5|4|5|6|7|10|10	3|3|0|0	6	1.5	0	0.12	0.94
PPP1R35-BirAFlag	NP_001129064.1	RPS27A	19|21|23|26|23|24|17|17|22|16|0|20	22|17|21|28	88	22	0	0.88	0.93
PPP1R35-BirAFlag	NP_001129125.1	PABPC4	13|12|22|19|30|35|26|23|14|15|19|15	18|20|15|15	68	17	0	0.52	0.94
PPP1R35-BirAFlag	NP_055484.3	NUP93	11|10|24|21|31|33|25|25|16|17|12|22	46|39|28|19	132	33	0	1.03	0.93
PPP1R35-BirAFlag	NP_001129224.1	ECD	9|9|24|16|24|18|35|34|34|26|52|53	31|33|34|30	128	32	0	0.61	0.94
PPP1R35-BirAFlag	NP_001129497.1	PLS3	24|23|47|40|26|30|34|38|59|43|49|62	15|22|7|7	51	12.75	0	0.21	0.94
PPP1R35-BirAFlag	NP_001129477.1	GART	47|47|90|79|70|77|33|33|43|39|60|64	33|32|45|49	159	39.75	0	0.47	0.94
PPP1R35-BirAFlag	NP_001129667.1	TNPO2	0|0|0|0|0|0|0|0|0|0|0|0	15|16|34|39	104	26	1	260	0
PPP1R35-BirAFlag	NP_002261.3	TNPO1	0|3|6|6|2|0|3|4|2|0|0|2	19|12|8|10	49	12.25	0.21	2.04	0.54
PPP1R35-BirAFlag	NP_057404.2	NUP98	6|4|5|6|16|17|25|30|5|2|10|9	35|36|21|23	115	28.75	0	1.05	0.92
PPP1R35-BirAFlag	NP_006697.2	TCERG1	16|11|21|22|21|25|69|65|24|24|28|26	24|21|9|8	62	15.5	0	0.23	0.94
PPP1R35-BirAFlag	NP_000692.2	ATP1A1	8|10|10|10|10|14|24|17|15|19|23|26	18|21|5|3	47	11.75	0	0.47	0.93
PPP1R35-BirAFlag	NP_005644.2	TFCP2	5|3|9|9|3|4|5|5|9|7|10|9	18|15|14|11	58	14.5	0	1.53	0.82
PPP1R35-BirAFlag	NP_006078.2	TUBB4A	0|7|0|0|9|0|28|18|0|0|31|27	28|25|14|0	67	16.75	0	0.57	0.93
PPP1R35-BirAFlag	NP_115914.1	TUBB6	10|14|11|5|14|13|12|12|8|11|10|14	16|14|4|6	40	10	0	0.71	0.91
PPP1R35-BirAFlag	NP_821133.1	TUBB	44|38|96|103|54|50|46|46|41|52|68|57	60|52|55|65	232	58	0	0.58	0.94
PPP1R35-BirAFlag	NP_006077.2	TUBB3	0|0|0|0|0|0|0|0|0|0|0|0	7|7|0|0	14	3.5	0.5	35	0.22
PPP1R35-BirAFlag	NP_821080.1	TUBB2B	10|15|21|15|0|0|0|0|23|21|22|20	13|13|0|5	31	7.75	0	0.34	0.93
PPP1R35-BirAFlag	NP_006640.2	UTP14A	0|0|7|6|3|0|20|21|6|5|20|19	15|17|7|8	47	11.75	0	0.57	0.93
PPP1R35-BirAFlag	NP_002853.2	PYGB	0|5|3|3|0|4|2|10|2|2|5|0	12|10|5|2	29	7.25	0	0.97	0.83
PPP1R35-BirAFlag	NP_001157412.1	PYGL	9|3|10|8|0|0|4|3|2|0|6|9	7|9|3|0	19	4.75	0	0.5	0.89
PPP1R35-BirAFlag	NP_060238.3	LRRC40	8|10|23|20|10|11|6|7|14|14|9|15	11|9|8|11	39	9.75	0	0.45	0.94
PPP1R35-BirAFlag	NP_060918.2	CAND1	28|26|56|52|27|26|10|10|22|19|45|44	28|31|43|38	140	35	0	0.65	0.94
PPP1R35-BirAFlag	NP_062565.2	PARD3	0|2|3|4|3|4|4|4|3|0|2|5	4|7|2|0	13	3.25	0	0.72	0.79
PPP1R35-BirAFlag	NP_653196.1	SLAIN1	0|0|0|0|0|0|0|2|0|0|0|0	2|2|0|0	4	1	0.02	1	0.68
PPP1R35-BirAFlag	NP_031393.2	RALY	0|0|3|2|2|0|2|4|0|0|0|0	4|4|0|0	8	2	0	0.57	0.79
PPP1R35-BirAFlag	NP_002613.2	PFDN1	0|0|0|0|0|0|5|4|0|0|0|5	20|22|6|9	57	14.25	0.5	2.85	0.26
PPP1R35-BirAFlag	NP_056347.1	POLR2M	0|0|0|0|0|0|0|3|0|0|0|0	3|0|0|0	3	0.75	0.01	0.5	0.71
PPP1R35-BirAFlag	NP_001137357.1	PPP1R12A	2|4|3|3|8|9|14|14|0|3|3|5	7|8|8|6	29	7.25	0	0.52	0.92
PPP1R35-BirAFlag	NP_037506.2	PDCD6IP	7|8|21|17|20|21|24|20|12|11|13|11	26|25|9|7	67	16.75	0	0.74	0.92
PPP1R35-BirAFlag	NP_001138303.1	PHB2	33|35|57|54|62|52|45|50|40|41|41|33	72|65|43|44	224	56	0	0.94	0.94
PPP1R35-BirAFlag	NP_078938.2	NAT10	9|8|27|21|32|26|70|53|20|20|43|41	34|34|15|10	93	23.25	0	0.38	0.94
PPP1R35-BirAFlag	NP_002615.2	PFDN5	0|3|18|18|4|4|9|9|8|7|16|22	20|22|32|31	105	26.25	0	1.31	0.9
PPP1R35-BirAFlag	NP_001138395.1	TTC26	0|0|0|0|0|0|0|0|0|0|0|0	2|0|2|0	4	1	0.37	10	0.38
PPP1R35-BirAFlag	NP_940877.2	FAM171A2	0|0|0|0|0|0|0|0|0|0|0|0	3|0|0|0	3	0.75	0.24	7.5	0.49
PPP1R35-BirAFlag	NP_006004.2	RPL10	12|11|17|15|21|20|11|12|13|14|19|11	25|25|13|12	75	18.75	0	0.91	0.92
PPP1R35-BirAFlag	NP_066973.2	GRIP1	0|0|0|0|0|0|3|3|0|0|0|0	4|3|0|0	7	1.75	0	0.58	0.78
PPP1R35-BirAFlag	NP_001138880.1	NONO	74|68|92|106|128|112|177|202|116|151|126|131	136|142|82|81	441	110.25	0	0.58	0.94
PPP1R35-BirAFlag	NP_001138926.1	STMN1	28|30|29|34|17|15|57|50|54|57|58|59	13|16|8|7	44	11	0	0.19	0.94
PPP1R35-BirAFlag	NP_056392.2	RAI14	18|25|33|24|66|70|52|52|32|24|26|26	15|13|22|17	67	16.75	0	0.25	0.94
PPP1R35-BirAFlag	NP_006302.2	NCOR1	0|2|0|0|0|2|11|7|2|3|3|3	7|7|6|6	26	6.5	0	0.72	0.9
PPP1R35-BirAFlag	NP_078880.2	RPAP3	21|26|24|34|49|54|50|47|15|19|25|19	75|73|51|53	252	63	0	1.21	0.93
PPP1R35-BirAFlag	NP_001139686.1	TBC1D15	11|19|37|31|38|34|27|25|11|13|30|25	40|41|48|39	168	42	0	1.12	0.93
PPP1R35-BirAFlag	NP_001139487.1	DLGAP5	3|0|9|12|17|16|59|54|9|16|19|19	20|19|8|8	55	13.75	0	0.24	0.94
PPP1R35-BirAFlag	NP_079055.3	PIP4K2C	0|0|4|4|2|3|9|7|6|6|7|4	4|2|0|0	6	1.5	0	0.19	0.94
PPP1R35-BirAFlag	NP_055548.3	ZFYVE16	7|9|30|23|43|39|14|13|4|9|22|16	3|4|11|7	25	6.25	0	0.15	0.94
PPP1R35-BirAFlag	NP_658988.2	SMCR8	0|2|6|3|0|0|7|7|5|8|7|4	2|3|0|0	5	1.25	0	0.17	0.94
PPP1R35-BirAFlag	NP_006363.4	SYNCRIP	27|25|59|49|48|37|43|38|27|23|43|51	37|39|33|32	141	35.25	0	0.64	0.94
PPP1R35-BirAFlag	NP_005817.1	HNRNPR	8|8|20|21|22|25|22|23|12|17|20|19	22|21|10|11	64	16	0	0.67	0.93
PPP1R35-BirAFlag	NP_060813.2	RIOK2	0|0|4|5|0|2|0|0|0|0|0|0	4|4|4|2	14	3.5	0	0.78	0.83
PPP1R35-BirAFlag	NP_690866.1	TIPRL	36|30|58|89|37|35|67|73|97|99|120|149	32|30|43|38	143	35.75	0	0.27	0.94
PPP1R35-BirAFlag	NP_683758.1	SNX1	21|28|25|29|36|36|45|45|35|35|30|27	40|38|23|17	118	29.5	0	0.66	0.94
PPP1R35-BirAFlag	NP_001153575.1	ZC3H14	0|4|7|5|7|8|31|32|0|4|3|8	9|9|5|4	27	6.75	0	0.21	0.94
PPP1R35-BirAFlag	NP_113668.2	RIOK1	0|0|4|5|11|8|22|19|7|8|7|7	12|11|8|6	37	9.25	0	0.45	0.93
PPP1R35-BirAFlag	NP_003886.3	SYNJ1	2|5|16|10|31|34|28|20|7|7|9|13	27|27|16|21	91	22.75	0	0.7	0.93
PPP1R35-BirAFlag	NP_001155032.1	TNIK	0|3|3|6|16|16|16|17|3|2|8|6	10|10|9|8	37	9.25	0	0.56	0.92
PPP1R35-BirAFlag	NP_663720.1	MAP4K4	0|0|0|0|0|0|0|0|0|3|0|2	3|6|0|0	9	2.25	0.01	0.9	0.7
PPP1R35-BirAFlag	NP_077719.2	NOTCH2	0|0|0|0|0|0|0|4|0|0|3|0	8|6|3|4	21	5.25	0	1.5	0.72
PPP1R35-BirAFlag	NP_002267.2	KRT19	16|20|27|23|60|55|13|14|6|2|8|8	40|45|33|25	143	35.75	0	0.62	0.94
PPP1R35-BirAFlag	NP_000412.3	KRT10	0|0|0|0|16|15|6|6|4|3|6|5	18|15|2|2	37	9.25	0	0.6	0.91
PPP1R35-BirAFlag	NP_036205.1	CCT5	24|33|83|68|59|56|35|30|51|58|68|76	78|78|122|124	402	100.5	0	1.26	0.94
PPP1R35-BirAFlag	NP_722550.1	RTN4	4|3|12|16|14|0|11|13|14|13|19|16	8|9|8|4	29	7.25	0	0.41	0.94
PPP1R35-BirAFlag	NP_002796.4	PSMC5	7|10|29|33|17|19|26|33|13|20|28|27	9|11|11|8	39	9.75	0	0.3	0.94
PPP1R35-BirAFlag	NP_055045.2	SRP68	19|17|43|29|55|55|65|76|36|41|38|40	41|37|31|29	138	34.5	0	0.49	0.94
PPP1R35-BirAFlag	NP_733765.1	ATP2A2	17|19|48|41|39|36|27|32|18|18|27|33	58|53|33|29	173	43.25	0	0.97	0.93
PPP1R35-BirAFlag	NP_002262.3	IPO5	3|0|17|22|6|3|0|0|5|0|20|18	5|5|11|15	36	9	0	0.43	0.93
PPP1R35-BirAFlag	NP_705898.1	CPNE8	0|0|0|5|0|0|5|3|11|9|16|16	14|18|14|17	63	15.75	0	0.98	0.91
PPP1R35-BirAFlag	NP_004945.4	MARK2	0|0|0|0|0|0|0|0|3|0|0|0	8|7|2|0	17	4.25	0.19	2.83	0.55
PPP1R35-BirAFlag	NP_001122390.1	MARK3	0|0|0|0|3|2|0|2|0|0|2|0	6|5|0|3	14	3.5	0.01	1.4	0.69
PPP1R35-BirAFlag	NP_001157632.1	PPP6R3	7|5|31|20|26|22|47|45|19|17|31|29	52|39|35|41	167	41.75	0	0.91	0.94
PPP1R35-BirAFlag	NP_057424.3	RAPGEF6	0|0|6|3|7|9|7|9|0|0|5|2	11|8|9|8	36	9	0	1	0.88
PPP1R35-BirAFlag	NP_003879.2	ALDH1A2	21|15|55|61|43|36|80|76|47|47|83|60	47|51|20|23	141	35.25	0	0.43	0.94
PPP1R35-BirAFlag	NP_000683.3	ALDH1B1	0|0|3|3|0|0|0|0|0|0|0|2	2|0|0|0	2	0.5	0	0.17	0.81
PPP1R35-BirAFlag	NP_001158286.1	ACIN1	0|0|7|5|20|23|47|47|10|8|18|16	6|6|0|5	17	4.25	0	0.09	0.94
PPP1R35-BirAFlag	NP_001159403.1	RRM2	3|2|5|6|3|3|34|18|12|16|17|19	14|15|7|0	36	9	0	0.34	0.93
PPP1R35-BirAFlag	NP_001159477.1	EPB41	65|63|118|128|144|143|113|113|69|66|106|89	55|69|52|46	222	55.5	0	0.39	0.94
PPP1R35-BirAFlag	NP_001159580.1	PALLD	0|3|4|2|6|5|21|14|3|2|4|2	8|9|2|2	21	5.25	0	0.3	0.93
PPP1R35-BirAFlag	NP_659498.4	SKA3	8|10|33|32|24|28|34|34|5|3|21|27	25|19|16|18	78	19.5	0	0.57	0.94
PPP1R35-BirAFlag	NP_001159757.1	CCT7	18|21|48|41|43|41|29|27|30|32|63|58	63|72|105|101	341	85.25	0	1.41	0.93
PPP1R35-BirAFlag	NP_001161143.1	LPP	0|0|0|3|6|4|16|18|4|5|3|8	14|11|3|3	31	7.75	0	0.46	0.92
PPP1R35-BirAFlag	NP_065176.3	NAV1	0|0|0|0|0|2|3|3|0|0|0|0	4|7|2|2	15	3.75	0.01	1.25	0.72
PPP1R35-BirAFlag	NP_060653.3	SBNO1	0|0|0|0|3|6|12|12|3|0|3|3	5|7|7|6	25	6.25	0	0.52	0.91
PPP1R35-BirAFlag	NP_002473.2	NASP	33|40|33|77|75|106|155|147|62|80|150|54	105|84|33|84	306	76.5	0	0.5	0.94
PPP1R35-BirAFlag	NP_733821.1	LMNA	0|0|4|4|0|0|7|8|0|0|0|4	9|9|2|3	23	5.75	0	0.77	0.86
PPP1R35-BirAFlag	NP_064504.2	ZC3HAV1	12|6|18|14|39|33|32|31|14|15|16|20	44|40|25|24	133	33.25	0	0.92	0.93
PPP1R35-BirAFlag	NP_068751.4	RIC8A	0|2|0|2|2|3|7|7|0|3|2|3	8|7|2|0	17	4.25	0	0.61	0.86
PPP1R35-BirAFlag	NP_060830.2	TXLNG	2|0|4|4|4|5|9|5|0|0|4|7	7|8|3|3	21	5.25	0	0.66	0.88
PPP1R35-BirAFlag	NP_001164014.1	PGAM5	16|18|19|10|45|45|11|8|8|10|11|9	31|26|14|12	83	20.75	0	0.46	0.94
PPP1R35-BirAFlag	NP_008830.2	IDH3B	0|0|0|4|3|4|3|0|3|2|6|4	11|12|2|3	28	7	0.01	1.4	0.71
PPP1R35-BirAFlag	NP_001163886.1	TJP2	9|9|16|23|51|47|28|29|14|11|14|25	25|20|21|23	89	22.25	0	0.45	0.94
PPP1R35-BirAFlag	NP_001164185.1	BCAR1	0|0|0|0|0|2|0|0|0|0|0|0	5|5|0|0	10	2.5	0.16	2.5	0.62
PPP1R35-BirAFlag	NP_443111.4	LARP4	0|0|5|5|6|5|7|5|3|5|4|11	7|5|0|4	16	4	0	0.44	0.9
PPP1R35-BirAFlag	NP_001164408.1	FUS	7|5|13|9|20|26|19|20|8|9|13|9	32|27|9|9	77	19.25	0	0.84	0.92
PPP1R35-BirAFlag	NP_001164006.1	ATAD3A	13|11|15|18|11|10|5|5|7|6|6|7	15|17|2|4	38	9.5	0	0.58	0.92
PPP1R35-BirAFlag	NP_056422.2	CHTOP	0|0|0|0|5|7|6|6|3|3|3|3	4|5|0|0	9	2.25	0	0.35	0.88
PPP1R35-BirAFlag	NP_001002814.2	RAB11FIP1	3|4|0|6|10|14|15|15|8|7|0|0	8|6|0|0	14	3.5	0	0.23	0.92
PPP1R35-BirAFlag	NP_789794.1	BBS7	0|0|0|0|0|0|0|0|0|0|0|0	6|8|2|0	16	4	0.69	40	0.12
PPP1R35-BirAFlag	NP_001307.2	CSE1L	16|18|37|35|17|10|46|35|24|29|38|30	42|42|28|25	137	34.25	0	0.82	0.94
PPP1R35-BirAFlag	NP_963863.2	SMG7	0|0|3|0|13|9|4|3|0|0|0|0	18|19|24|19	80	20	0	1.82	0.78
PPP1R35-BirAFlag	NP_001167568.1	LDHB	4|5|21|17|8|6|6|6|3|5|8|5	15|16|22|22	75	18.75	0	0.99	0.92
PPP1R35-BirAFlag	NP_001158886.1	LDHA	2|3|12|10|6|3|3|4|5|4|11|12	7|10|13|9	39	9.75	0	0.81	0.9
PPP1R35-BirAFlag	NP_036286.2	EIF2C2	0|3|5|0|9|6|8|7|4|3|7|0	14|14|24|23	75	18.75	0.18	2.21	0.62
PPP1R35-BirAFlag	NP_001171062.1	PPP2R2A	7|9|13|11|21|25|10|10|10|10|10|15	26|19|18|16	79	19.75	0	0.86	0.92
PPP1R35-BirAFlag	NP_001046.2	SULT1A1	0|8|24|18|13|14|0|0|0|0|0|0	8|6|3|0	17	4.25	0	0.2	0.93
PPP1R35-BirAFlag	NP_808227.1	CSNK2A1	14|11|22|24|18|15|38|34|32|32|45|34	31|30|31|29	121	30.25	0	0.73	0.94
PPP1R35-BirAFlag	NP_973726.2	SF1	21|25|40|26|20|18|56|55|46|60|58|50	24|23|13|12	72	18	0	0.31	0.94
PPP1R35-BirAFlag	NP_001171825.1	PHF8	0|0|0|0|0|0|6|6|0|3|0|4	4|0|0|0	4	1	0	0.17	0.88
PPP1R35-BirAFlag	NP_001171894.1	WDR44	22|23|29|36|39|43|65|64|25|24|34|29	12|10|9|5	36	9	0	0.14	0.94
PPP1R35-BirAFlag	NP_001172005.1	FMR1	0|0|9|7|0|0|6|5|3|5|3|11	6|5|7|3	21	5.25	0	0.53	0.9
PPP1R35-BirAFlag	NP_004851.2	FXR2	7|5|11|10|9|10|14|10|5|4|4|9	6|7|4|4	21	5.25	0	0.42	0.94
PPP1R35-BirAFlag	NP_001110.2	ADD1	10|12|20|24|27|27|23|22|12|13|15|17	13|9|11|9	42	10.5	0	0.39	0.94
PPP1R35-BirAFlag	NP_001177645.1	DNM2	0|0|6|6|0|2|4|0|0|0|3|2	13|15|10|9	47	11.75	0.01	1.96	0.69
PPP1R35-BirAFlag	NP_060548.2	LARP1B	0|0|3|3|2|2|6|5|0|0|12|13	3|4|4|14	25	6.25	0	0.5	0.9
PPP1R35-BirAFlag	NP_817126.1	ACTL6A	0|0|0|0|2|2|5|6|5|0|9|3	5|4|8|6	23	5.75	0	0.77	0.87
PPP1R35-BirAFlag	NP_149072.2	DIDO1	6|7|17|14|24|17|26|23|7|6|23|27	12|10|13|9	44	11	0	0.42	0.94
PPP1R35-BirAFlag	NP_001180424.1	ADAR	20|17|34|33|22|23|66|64|48|51|19|13	32|27|33|31	123	30.75	0	0.47	0.94
PPP1R35-BirAFlag	NP_886553.3	EIF4G1	52|50|85|98|151|158|130|134|58|60|89|87	99|108|75|78	360	90	0	0.58	0.94
PPP1R35-BirAFlag	NP_001182356.1	SRSF2	2|0|3|12|6|6|9|8|7|4|6|8	10|10|0|0	20	5	0	0.48	0.9
PPP1R35-BirAFlag	NP_001182375.1	SRSF7	6|6|6|7|18|22|20|17|12|12|9|11	14|11|11|11	47	11.75	0	0.56	0.93
PPP1R35-BirAFlag	NP_001182484.1	CLINT1	21|27|33|32|52|52|58|63|30|36|36|38	52|49|24|30	155	38.75	0	0.64	0.94
PPP1R35-BirAFlag	NP_001184222.1	DPYSL2	36|37|70|78|80|77|141|137|72|75|110|113	61|68|38|36	203	50.75	0	0.37	0.94
PPP1R35-BirAFlag	NP_001184223.1	DPYSL3	17|14|37|35|39|44|102|100|36|34|45|37	29|32|15|14	90	22.5	0	0.22	0.94
PPP1R35-BirAFlag	NP_001304.1	CRMP1	4|6|11|13|9|9|18|11|6|3|9|10	7|9|2|3	21	5.25	0	0.34	0.94
PPP1R35-BirAFlag	NP_851307.1	PPP2R5D	7|7|15|13|4|4|19|18|12|8|14|15	32|23|30|24	109	27.25	0	1.47	0.89
PPP1R35-BirAFlag	NP_001185709.1	ARPC4	4|0|0|4|2|3|6|3|0|4|0|3	8|2|5|7	22	5.5	0	1.1	0.79
PPP1R35-BirAFlag	NP_003613.3	PPFIBP1	0|0|0|2|0|0|0|0|0|0|0|0	5|5|4|4	18	4.5	0.26	4.5	0.42
PPP1R35-BirAFlag	NP_001186071.1	EIF3C	0|0|0|0|31|33|30|36|0|0|0|0	26|36|0|0	62	15.5	0	0.45	0.93
PPP1R35-BirAFlag	NP_001186084.1	KAT7	0|0|0|0|0|0|2|2|0|0|0|0	4|3|0|0	7	1.75	0	0.88	0.72
PPP1R35-BirAFlag	NP_001186269.1	RPL17	18|18|34|35|32|32|15|18|20|20|21|26	32|24|28|22	106	26.5	0	0.77	0.93
PPP1R35-BirAFlag	NP_001186740.1	INTS7	0|0|0|0|0|0|0|2|0|0|0|2	4|7|0|0	11	2.75	0.09	1.38	0.63
PPP1R35-BirAFlag	NP_009194.2	COPE	2|3|8|4|2|0|0|0|0|0|3|0	3|0|6|3	12	3	0	0.5	0.86
PPP1R35-BirAFlag	NP_001061.2	TUBG1	3|0|14|8|11|6|7|8|3|4|5|7	12|9|6|11	38	9.5	0	0.76	0.91
PPP1R35-BirAFlag	NP_852136.1	RFC2	0|0|6|2|0|0|6|3|2|3|8|8	4|0|0|4	8	2	0	0.25	0.9
PPP1R35-BirAFlag	NP_115949.3	SMEK1	10|11|31|39|16|20|48|42|19|22|49|36	28|30|30|27	115	28.75	0	0.59	0.94
PPP1R35-BirAFlag	NP_001186883.1	ACTG1	34|35|60|60|67|64|65|76|0|36|60|59	56|73|41|31	201	50.25	0	0.7	0.94
PPP1R35-BirAFlag	NP_001017992.1	ACTBL2	0|3|0|4|0|0|3|4|0|0|0|0	3|2|0|3	8	2	0	0.5	0.83
PPP1R35-BirAFlag	NP_005800.3	PRDX2	12|15|25|23|26|26|27|25|17|30|33|36	23|22|14|17	76	19	0	0.55	0.94
PPP1R35-BirAFlag	NP_858058.1	OGT	3|6|14|10|22|20|10|16|8|4|13|9	4|3|8|10	25	6.25	0	0.3	0.94
PPP1R35-BirAFlag	NP_001191187.1	NR3C1	0|0|3|3|10|7|9|10|3|2|4|5	7|5|3|2	17	4.25	0	0.42	0.91
PPP1R35-BirAFlag	NP_852664.1	PIK3R1	0|0|0|0|0|0|0|0|0|0|0|0	5|3|4|4	16	4	0.98	40	0
PPP1R35-BirAFlag	NP_002568.2	PAK2	7|8|9|11|10|13|30|34|18|14|15|15	11|6|0|2	19	4.75	0	0.15	0.94
PPP1R35-BirAFlag	NP_003655.3	AP3B1	7|6|18|14|17|20|8|7|9|8|10|8	18|15|20|21	74	18.5	0	0.97	0.92
PPP1R35-BirAFlag	NP_116021.2	PAPOLA	48|50|100|87|65|64|99|104|95|113|131|112	44|42|34|29	149	37.25	0	0.31	0.94
PPP1R35-BirAFlag	NP_001191332.1	ANK3	7|3|16|6|8|7|39|43|30|26|46|39	5|3|0|2	10	2.5	0	0.06	0.94
PPP1R35-BirAFlag	NP_001191397.1	RBM10	11|12|17|22|19|24|16|52|25|27|35|32	11|14|20|14	59	14.75	0	0.34	0.94
PPP1R35-BirAFlag	NP_004422.2	EPHA2	3|2|5|6|22|16|8|7|4|0|3|5	27|24|14|13	78	19.5	0	1.03	0.91
PPP1R35-BirAFlag	NP_038476.2	BAZ1A	2|3|8|12|20|22|43|36|6|7|35|28	17|15|9|9	50	12.5	0	0.32	0.94
PPP1R35-BirAFlag	NP_001193638.1	PRKAG1	4|5|10|15|9|11|10|11|5|4|9|11	9|7|12|10	38	9.5	0	0.73	0.91
PPP1R35-BirAFlag	NP_001193876.1	PICALM	0|0|5|9|6|4|13|11|13|9|13|19	6|5|7|5	23	5.75	0	0.36	0.94
PPP1R35-BirAFlag	NP_002645.3	PKM2	69|57|92|83|169|170|164|156|115|104|120|128	157|141|80|80	458	114.5	0	0.68	0.94
PPP1R35-BirAFlag	NP_001193937.1	MLLT4	42|50|111|89|153|175|177|173|112|87|142|148	89|89|47|55	280	70	0	0.4	0.94
PPP1R35-BirAFlag	NP_002825.3	PTPN11	15|19|40|33|24|24|53|59|58|53|96|64	17|17|6|5	45	11.25	0	0.14	0.94
PPP1R35-BirAFlag	NP_877423.1	MCM4	17|22|42|29|48|41|43|44|31|37|39|39	62|63|59|59	243	60.75	0	1.32	0.93
PPP1R35-BirAFlag	NP_057190.2	SCFD1	7|2|17|10|5|0|13|12|10|11|22|21	5|11|4|6	26	6.5	0	0.3	0.93
PPP1R35-BirAFlag	NP_005907.3	MCM7	20|15|49|46|77|71|24|25|27|30|48|44	85|84|66|64	299	74.75	0	1.01	0.94
PPP1R35-BirAFlag	NP_061173.1	RBBP6	3|2|0|2|0|0|8|16|4|4|7|9	8|6|0|5	19	4.75	0	0.38	0.92
PPP1R35-BirAFlag	NP_001229573.1	RAB2A	5|3|4|7|3|0|8|8|4|5|10|6	5|3|2|0	10	2.5	0	0.28	0.94
PPP1R35-BirAFlag	NP_892021.1	ZNF326	4|4|0|6|13|18|2|4|4|0|0|0	16|20|8|6	50	12.5	0	0.81	0.91
PPP1R35-BirAFlag	NP_004550.2	YBX1	14|9|17|4|18|17|11|11|7|13|6|11	13|15|11|0	39	9.75	0	0.56	0.92
PPP1R35-BirAFlag	NP_003642.3	CSDA	0|0|0|0|28|8|6|3|0|0|0|0	2|4|0|0	6	1.5	0	0.08	0.93
PPP1R35-BirAFlag	NP_898868.1	ZMYND8	3|4|5|4|4|6|19|16|8|6|11|10	10|10|4|3	27	6.75	0	0.39	0.93
PPP1R35-BirAFlag	NP_055971.2	RCOR1	0|2|5|6|3|0|5|4|0|0|5|4	9|10|8|6	33	8.25	0	1.5	0.78
PPP1R35-BirAFlag	NP_001230821.1	TPD52L2	2|5|9|9|11|7|14|14|11|7|10|13	6|8|0|0	14	3.5	0	0.25	0.94
PPP1R35-BirAFlag	NP_001186211.2	LRBA	26|26|50|50|86|88|49|46|19|23|32|36	24|26|23|20	93	23.25	0	0.27	0.94
PPP1R35-BirAFlag	NP_001238968.1	RAB5C	3|4|5|11|10|9|8|10|7|5|11|10	11|8|0|8	27	6.75	0	0.61	0.9
PPP1R35-BirAFlag	NP_004153.2	RAB5A	2|0|4|6|6|7|0|8|4|3|0|0	9|11|3|0	23	5.75	0	0.77	0.84
PPP1R35-BirAFlag	NP_874365.3	SCRIB	13|16|22|21|21|17|36|37|21|30|18|32	32|32|37|34	135	33.75	0	0.92	0.93
PPP1R35-BirAFlag	NP_001240626.1	ERBB2IP	14|13|22|30|53|54|35|38|12|17|40|31	52|51|49|45	197	49.25	0	0.92	0.94
PPP1R35-BirAFlag	NP_001243125.1	ARAF	0|0|0|0|0|0|0|2|0|0|0|0	4|5|0|3	12	3	0.15	3	0.62
PPP1R35-BirAFlag	NP_001243194.1	FLII	0|0|4|2|2|0|0|0|0|0|2|0	13|18|11|11	53	13.25	0.87	4.42	0.02
PPP1R35-BirAFlag	NP_001243211.1	KRT8	32|28|51|39|92|84|45|44|19|18|16|20	59|60|43|44	206	51.5	0	0.59	0.94
PPP1R35-BirAFlag	NP_006112.3	KRT1	0|0|0|0|34|33|14|17|17|18|39|31	28|25|18|21	92	23	0	0.63	0.94
PPP1R35-BirAFlag	NP_006448.4	PDLIM5	23|18|36|38|41|42|68|73|56|54|56|65	52|50|29|33	164	41	0	0.58	0.94
PPP1R35-BirAFlag	NP_031373.2	AP4E1	0|0|3|0|0|3|5|4|0|0|0|0	4|0|2|3	9	2.25	0	0.5	0.84
PPP1R35-BirAFlag	NP_829884.1	ERC1	7|6|15|19|23|24|13|11|2|0|0|0	36|36|24|27	123	30.75	0	1.31	0.91
PPP1R35-BirAFlag	NP_937818.1	NME1	0|0|0|0|11|12|12|13|0|0|10|6	12|12|0|0	24	6	0	0.48	0.91
PPP1R35-BirAFlag	NP_001244222.1	HNRNPH1	19|14|46|47|40|34|33|32|22|27|36|37	43|42|29|29	143	35.75	0	0.77	0.94
PPP1R35-BirAFlag	NP_001410.2	ELAVL1	11|13|12|13|15|16|21|21|14|7|14|20	32|27|10|10	79	19.75	0	0.94	0.91
PPP1R35-BirAFlag	NP_689508.3	TARS	21|18|27|19|14|11|43|43|26|27|17|32	22|20|18|17	77	19.25	0	0.45	0.94
PPP1R35-BirAFlag	NP_006421.2	CCT4	32|35|76|83|65|63|49|55|46|40|68|87	86|89|84|81	340	85	0	1	0.94
PPP1R35-BirAFlag	NP_001245200.1	MLH1	0|2|10|7|9|13|10|9|5|10|10|15	5|7|3|4	19	4.75	0	0.34	0.94
PPP1R35-BirAFlag	NP_001245237.1	NOP2	4|5|10|8|13|12|17|15|0|5|4|3	15|14|2|3	34	8.5	0	0.53	0.92
PPP1R35-BirAFlag	NP_001245308.1	SLC4A7	0|0|4|0|0|0|4|9|0|2|0|4	5|0|4|3	12	3	0	0.46	0.87
PPP1R35-BirAFlag	NP_054767.3	MKL2	69|75|139|144|244|236|12|12|8|14|22|22	104|84|110|108	406	101.5	0	0.42	0.94
PPP1R35-BirAFlag	NP_689706.2	ZNF362	0|0|0|0|0|0|0|0|0|2|0|3	3|3|0|0	6	1.5	0	0.6	0.77
PPP1R35-BirAFlag	NP_942133.1	ACACA	289|295|618|571|881|872|162|151|168|136|203|199	273|266|395|375	1309	327.25	0	0.37	0.94
PPP1R35-BirAFlag	NP_001084.3	ACACB	57|65|174|167|149|134|0|0|0|4|3|7	50|44|86|86	266	66.5	0	0.39	0.94
PPP1R35-BirAFlag	NP_115593.3	ANKRD17	12|11|21|30|32|29|47|26|24|27|36|31	40|64|55|52	211	52.75	0	1.27	0.93
PPP1R35-BirAFlag	NP_065741.3	ANKHD1-EIF4EBP3	8|9|9|24|18|17|30|15|7|12|18|9	43|27|63|59	192	48	0	1.78	0.81
PPP1R35-BirAFlag	NP_001252541.1	CNOT1	4|7|14|21|41|38|21|22|5|5|7|8	69|57|68|74	268	67	0	1.7	0.92
PPP1R35-BirAFlag	NP_001253988.1	SNX17	0|0|0|0|0|0|0|0|0|0|0|4	4|0|0|0	4	1	0	0.5	0.72
PPP1R35-BirAFlag	NP_001254485.1	PDCD6	3|6|7|6|3|0|2|2|0|4|0|0	5|2|5|0	12	3	0	0.46	0.87
PPP1R35-BirAFlag	NP_001254507.1	TOR1AIP1	0|3|0|2|0|0|19|16|14|11|11|10	3|2|0|0	5	1.25	0	0.07	0.94
PPP1R35-BirAFlag	NP_002379.3	MCM3	8|6|17|17|20|18|25|32|13|10|17|17	26|18|17|9	70	17.5	0	0.61	0.93
PPP1R35-BirAFlag	NP_060225.4	NSUN2	10|11|38|30|20|20|29|22|18|20|30|29	34|35|21|18	108	27	0	0.79	0.93
PPP1R35-BirAFlag	NP_001258016.1	VPS72	0|0|0|0|0|0|13|16|0|5|5|3	10|7|2|0	19	4.75	0	0.33	0.92
PPP1R35-BirAFlag	XP_003960691.1	LOC101060252	3|5|8|5|13|10|9|8|0|0|3|3	13|12|0|3	28	7	0	0.61	0.9
PPP1R35-BirAFlag	NP_055535.2	SLK	35|40|66|68|98|95|90|86|46|48|64|61	27|25|14|15	81	20.25	0	0.21	0.94
PPP1R35-BirAFlag	NP_058431.2	CRK	34|39|70|65|81|73|129|134|83|79|110|118	163|154|76|71	464	116	0	0.88	0.94
PPP1R35-BirAFlag	NP_958815.1	LUC7L	0|0|3|0|6|4|2|3|0|0|0|0	6|5|0|0	11	2.75	0	0.55	0.83
PPP1R35-BirAFlag	NP_057103.2	LUC7L2	7|5|5|4|6|6|4|6|4|0|4|4	5|5|5|5	20	5	0	0.77	0.87
PPP1R35-BirAFlag	NP_004414.3	DVL3	13|13|43|53|47|36|36|37|22|27|31|30	66|61|54|46	227	56.75	0	1.14	0.94
PPP1R35-BirAFlag	NP_976221.1	HDLBP	39|41|69|77|85|80|106|97|59|67|96|81	80|86|72|69	307	76.75	0	0.76	0.94
PPP1R35-BirAFlag	NP_004448.2	ACSL3	3|0|6|2|3|2|7|8|7|5|11|5	5|4|0|0	9	2.25	0	0.24	0.91
PPP1R35-BirAFlag	NP_981959.1	C17orf81	12|15|10|12|16|17|21|22|11|9|14|15	17|14|13|11	55	13.75	0	0.64	0.93
PPP1R35-BirAFlag	NP_001753.1	CCT6A	20|23|95|91|52|50|39|44|27|28|71|65	73|66|89|100	328	82	0	0.88	0.94
PPP1R35-BirAFlag	NP_001777.1	CDK1	21|26|55|55|35|36|43|47|30|30|49|57	45|41|23|24	133	33.25	0	0.59	0.94
PPP1R35-BirAFlag	NP_439892.2	CDK2	4|3|11|12|9|7|27|28|13|18|28|22	18|20|14|14	66	16.5	0	0.59	0.93
PPP1R35-BirAFlag	NP_001252.1	CDK9	0|4|9|9|7|9|21|18|10|11|9|9	18|17|9|6	50	12.5	0	0.64	0.92
PPP1R35-BirAFlag	NP_004926.1	CDK5	0|0|3|8|0|0|0|0|0|2|3|0	6|4|11|8	29	7.25	0	1.32	0.77
PPP1R35-BirAFlag	NP_148978.2	CDK16	0|0|0|0|0|0|13|14|4|3|5|7	5|8|0|0	13	3.25	0	0.24	0.92
PPP1R35-BirAFlag	NP_001830.1	CNN3	8|8|33|24|19|18|55|60|43|53|116|136	23|22|21|21	87	21.75	0	0.17	0.94
PPP1R35-BirAFlag	NP_004359.1	CNN2	8|8|12|16|8|10|13|13|12|12|19|13	4|8|5|8	25	6.25	0	0.36	0.94
PPP1R35-BirAFlag	NP_000782.1	DHFR	2|0|0|8|11|11|8|7|0|0|5|4	9|10|20|15	54	13.5	0	1.23	0.84
PPP1R35-BirAFlag	NP_001921.1	DHPS	0|0|0|3|0|2|4|3|0|0|2|0	10|9|4|8	31	7.75	0.06	2.21	0.64
PPP1R35-BirAFlag	NP_001354.1	DKC1	0|0|14|18|0|2|12|11|9|8|26|28	4|3|7|10	24	6	0	0.22	0.94
PPP1R35-BirAFlag	NP_001393.1	EEF1A1	76|80|343|345|114|104|160|153|169|202|450|547	90|69|63|60	282	70.5	0	0.14	0.94
PPP1R35-BirAFlag	NP_001407.1	EIF4A1	46|50|73|69|101|107|65|84|68|62|67|52	95|108|60|59	322	80.5	0	0.77	0.94
PPP1R35-BirAFlag	NP_001419.1	ENO1	94|120|286|275|171|171|162|197|147|185|233|223	217|225|116|119	677	169.25	0	0.6	0.94
PPP1R35-BirAFlag	NP_001422.1	EPB41L2	40|53|100|97|116|111|113|120|72|69|85|94	50|53|26|24	153	38.25	0	0.32	0.94
PPP1R35-BirAFlag	NP_001972.1	EPS15	10|8|29|38|42|37|51|42|19|14|23|25	24|25|16|18	83	20.75	0	0.45	0.94
PPP1R35-BirAFlag	NP_002098.1	H3F3A	0|0|0|0|0|0|0|0|0|0|0|0	13|0|0|0	13	3.25	0.25	32.5	0.43
PPP1R35-BirAFlag	NP_002626.1	SLC25A3	7|7|27|24|22|20|9|10|5|6|14|11	37|34|18|20	109	27.25	0	1.07	0.92
PPP1R35-BirAFlag	NP_003737.1	DYNLL1	0|0|0|0|8|6|0|10|0|0|5|5	13|10|0|0	23	5.75	0	0.64	0.86
PPP1R35-BirAFlag	NP_002700.1	PPP1CB	3|0|0|0|0|0|10|12|8|8|24|7	10|10|5|5	30	7.5	0	0.42	0.93
PPP1R35-BirAFlag	NP_001231903.1	PPP1CC	0|5|7|10|11|14|22|14|8|7|10|10	19|15|9|10	53	13.25	0	0.74	0.92
PPP1R35-BirAFlag	NP_002699.1	PPP1CA	2|2|6|5|9|10|13|12|6|7|7|8	12|13|7|6	38	9.5	0	0.76	0.9
PPP1R35-BirAFlag	NP_002756.1	PRPS2	0|0|0|0|0|0|0|0|0|0|0|0	9|0|0|0	9	2.25	0.25	22.5	0.43
PPP1R35-BirAFlag	NP_002783.1	PSMA7	0|0|6|6|4|0|4|5|2|0|0|4	4|3|4|0	11	2.75	0	0.46	0.87
PPP1R35-BirAFlag	NP_002794.1	PSMC2	13|14|26|24|38|36|37|27|6|16|20|19	28|25|30|19	102	25.5	0	0.68	0.94
PPP1R35-BirAFlag	NP_002807.1	PSMD12	7|2|13|11|15|16|26|25|9|9|13|9	9|12|6|7	34	8.5	0	0.33	0.94
PPP1R35-BirAFlag	NP_002849.1	ABCD3	4|10|15|19|23|18|20|17|16|11|21|19	20|15|11|10	56	14	0	0.64	0.93
PPP1R35-BirAFlag	NP_002884.1	RBBP7	10|12|5|12|20|17|21|22|12|14|13|19	23|24|18|20	85	21.25	0	0.99	0.92
PPP1R35-BirAFlag	NP_005601.1	RBBP4	2|5|5|7|15|19|14|16|8|9|11|11	16|11|7|15	49	12.25	0	0.7	0.92
PPP1R35-BirAFlag	NP_000970.1	RPL18	12|16|17|18|18|24|24|20|14|16|15|12	29|28|16|14	87	21.75	0	0.91	0.92
PPP1R35-BirAFlag	NP_000984.1	RPL31	14|10|14|13|17|14|9|9|9|9|9|11	12|14|11|10	47	11.75	0	0.76	0.92
PPP1R35-BirAFlag	NP_000997.1	RPS3A	14|14|23|20|40|33|60|68|41|42|29|34	48|44|11|11	114	28.5	0	0.45	0.94
PPP1R35-BirAFlag	NP_000998.1	RPS4X	17|20|35|42|62|55|33|36|26|26|30|30	64|48|22|28	162	40.5	0	0.69	0.94
PPP1R35-BirAFlag	NP_003016.1	SH3GL1	11|10|10|11|10|11|20|19|16|22|22|24	15|16|7|10	48	12	0	0.52	0.93
PPP1R35-BirAFlag	NP_003017.1	SH3GL2	0|0|0|0|0|0|7|11|11|7|3|8	4|3|0|0	7	1.75	0	0.16	0.92
PPP1R35-BirAFlag	NP_003127.1	SRP54	0|4|11|12|4|6|24|22|12|14|18|24	21|17|13|8	59	14.75	0	0.61	0.93
PPP1R35-BirAFlag	NP_003555.1	TAGLN2	42|42|80|70|55|61|109|111|99|79|172|150	56|50|50|41	197	49.25	0	0.31	0.94
PPP1R35-BirAFlag	NP_003267.1	TMPO	15|19|42|48|34|33|73|83|48|47|74|65	44|32|26|28	130	32.5	0	0.41	0.94
PPP1R35-BirAFlag	NP_003343.1	SUMO1	4|4|3|0|8|6|7|10|0|0|0|0	7|10|7|0	24	6	0	0.67	0.88
PPP1R35-BirAFlag	NP_003363.1	VBP1	3|3|10|6|0|0|10|10|11|14|26|23	18|16|30|23	87	21.75	0	0.89	0.92
PPP1R35-BirAFlag	NP_003394.1	YY1	0|0|0|0|5|0|12|11|0|0|0|0	9|6|0|0	15	3.75	0	0.33	0.91
PPP1R35-BirAFlag	NP_690867.3	KBTBD6	0|0|0|0|0|0|2|0|0|0|0|0	2|0|0|0	2	0.5	0.01	0.5	0.7
PPP1R35-BirAFlag	NP_001273.1	AP2B1	5|8|24|37|22|16|16|15|24|29|59|38	14|15|32|24	85	21.25	0	0.44	0.94
PPP1R35-BirAFlag	NP_000242.1	MSH2	6|6|14|19|9|5|15|21|8|9|28|20	13|11|4|8	36	9	0	0.37	0.94
PPP1R35-BirAFlag	NP_000265.1	OAT	0|3|7|7|7|4|2|3|0|0|0|4	6|7|0|0	13	3.25	0	0.46	0.87
PPP1R35-BirAFlag	NP_002524.2	NVL	4|5|9|8|3|6|27|28|17|13|13|27	14|15|6|5	40	10	0	0.36	0.93
PPP1R35-BirAFlag	NP_060418.4	NOL8	0|0|0|0|0|0|12|11|3|4|3|7	5|0|0|0	5	1.25	0	0.11	0.92
PPP1R35-BirAFlag	NP_002559.2	PABPC1	18|17|44|42|47|48|37|32|16|21|45|38	29|35|45|39	148	37	0	0.78	0.94
PPP1R35-BirAFlag	NP_996925.1	ENSA	4|0|0|4|0|0|10|10|10|11|13|7	4|7|0|0	11	2.75	0	0.23	0.92
PPP1R35-BirAFlag	NP_998734.1	NEBL	0|0|2|3|2|0|10|9|4|0|10|9	9|10|0|0	19	4.75	0	0.47	0.89
PPP1R35-BirAFlag	NP_004175.2	WARS	19|26|73|70|45|29|30|32|22|28|59|66	33|35|31|26	125	31.25	0	0.44	0.94
PPP1R35-BirAFlag	NP_003128.3	SRPK1	0|0|5|7|2|0|7|7|0|3|13|0	7|5|15|10	37	9.25	0	0.93	0.87
PPP1R35-BirAFlag	NP_004037.1	ATP5A1	55|63|128|124|105|110|115|117|92|85|103|112	150|155|83|85	473	118.25	0	0.94	0.94
PPP1R35-BirAFlag	NP_004850.1	CLTC	5|5|26|19|10|7|4|3|4|6|7|7	12|8|5|7	32	8	0	0.36	0.93
PPP1R35-BirAFlag	NP_004378.1	NKX2-5	0|0|0|0|0|0|8|0|0|5|0|3	2|3|0|0	5	1.25	0	0.19	0.89
PPP1R35-BirAFlag	NP_004690.1	FAM50A	0|0|2|2|4|0|27|25|17|17|19|21	4|3|0|0	7	1.75	0	0.07	0.94
PPP1R35-BirAFlag	NP_004484.1	HSD17B10	3|0|12|8|15|12|7|7|10|12|12|15	17|17|11|10	55	13.75	0	0.92	0.91
PPP1R35-BirAFlag	NP_004485.1	HDGF	0|0|3|5|0|4|25|27|14|16|16|21	2|5|0|0	7	1.75	0	0.07	0.94
PPP1R35-BirAFlag	NP_004789.1	KIF3B	0|0|0|0|0|0|0|0|0|0|0|0	3|2|0|0	5	1.25	0.42	12.5	0.37
PPP1R35-BirAFlag	NP_004512.1	KIF5B	35|36|81|68|105|95|70|65|31|32|57|44	45|38|26|27	136	34	0	0.34	0.94
PPP1R35-BirAFlag	NP_004634.1	PABPN1	0|5|3|0|5|5|13|13|5|0|7|0	5|3|2|0	10	2.5	0	0.19	0.92
PPP1R35-BirAFlag	NP_004148.1	PRKAR2A	0|3|7|8|4|4|16|20|12|11|32|22	7|6|0|2	15	3.75	0	0.14	0.94
PPP1R35-BirAFlag	NP_004577.1	RPS6KA3	0|0|0|3|0|0|0|3|8|9|0|5	6|3|0|0	9	2.25	0	0.26	0.9
PPP1R35-BirAFlag	NP_004588.1	SNRPD2	4|9|13|18|9|11|37|33|19|21|34|34	12|12|10|11	45	11.25	0	0.32	0.94
PPP1R35-BirAFlag	NP_004772.1	VAMP3	4|4|7|5|7|7|16|15|8|11|10|8	8|8|3|4	23	5.75	0	0.37	0.94
PPP1R35-BirAFlag	NP_004729.1	VAPB	0|3|6|6|10|8|14|15|11|11|12|11	11|10|0|0	21	5.25	0	0.36	0.92
PPP1R35-BirAFlag	NP_001673.2	ATP2B1	3|3|4|3|3|4|0|2|0|0|0|0	9|4|0|3	16	4	0	1	0.73
PPP1R35-BirAFlag	NP_004921.1	CAPZB	17|18|20|21|52|50|71|66|20|21|25|28	38|43|24|23	128	32	0	0.47	0.94
PPP1R35-BirAFlag	NP_005100.1	OXSR1	0|0|4|4|0|0|4|4|2|0|0|0	3|0|0|0	3	0.75	0	0.19	0.84
PPP1R35-BirAFlag	NP_005262.1	GLUD1	9|7|16|11|13|17|6|7|6|6|8|8	17|18|0|3	38	9.5	0	0.58	0.91
PPP1R35-BirAFlag	NP_005312.1	HIST1H1E	0|0|0|0|21|16|18|19|0|0|0|0	20|19|0|0	39	9.75	0	0.49	0.92
PPP1R35-BirAFlag	NP_005310.1	HIST1H1C	12|22|17|30|14|12|25|52|29|24|15|13	13|16|17|15	61	15.25	0	0.37	0.94
PPP1R35-BirAFlag	NP_005311.1	HIST1H1D	0|0|0|0|0|0|0|0|0|0|0|0	7|6|6|2	21	5.25	0.94	52.5	0.01
PPP1R35-BirAFlag	NP_005727.1	ACTR1A	0|6|19|11|17|21|11|14|7|8|13|0	7|9|3|0	19	4.75	0	0.24	0.94
PPP1R35-BirAFlag	NP_005713.1	ACTR2	3|4|4|3|0|0|0|4|4|4|2|3	2|3|6|3	14	3.5	0	0.88	0.79
PPP1R35-BirAFlag	NP_005498.1	CFL1	8|11|25|21|25|25|25|20|18|24|15|16	34|35|16|16	101	25.25	0	1.01	0.92
PPP1R35-BirAFlag	NP_005539.1	KARS	5|6|9|14|20|18|8|5|0|0|2|4	25|24|15|17	81	20.25	0	1.07	0.91
PPP1R35-BirAFlag	NP_005564.1	LMNB1	10|13|33|29|23|19|18|18|5|5|12|10	22|24|10|7	63	15.75	0	0.51	0.93
PPP1R35-BirAFlag	NP_005582.1	MRE11A	46|47|118|115|93|87|130|133|112|124|205|204	86|91|55|63	295	73.75	0	0.36	0.94
PPP1R35-BirAFlag	NP_005875.1	PAK4	3|0|0|0|0|0|16|11|4|5|7|8	9|10|4|4	27	6.75	0	0.5	0.92
PPP1R35-BirAFlag	NP_005868.1	SF3A1	15|18|35|43|29|29|36|33|26|30|48|30	20|19|27|28	94	23.5	0	0.52	0.94
PPP1R35-BirAFlag	NP_005619.1	SLC1A5	6|6|19|25|11|11|30|27|13|14|29|31	21|19|16|14	70	17.5	0	0.57	0.93
PPP1R35-BirAFlag	NP_001002032.1	HN1	6|8|20|16|22|13|26|28|32|44|48|39	10|8|8|7	33	8.25	0	0.18	0.94
PPP1R35-BirAFlag	NP_001001973.1	ATP5C1	17|19|22|21|20|21|20|22|15|18|15|17	27|23|13|18	81	20.25	0	0.92	0.92
PPP1R35-BirAFlag	NP_004719.2	DDX21	25|31|55|54|74|88|87|88|33|60|63|56	71|70|25|35	201	50.25	0	0.57	0.94
PPP1R35-BirAFlag	NP_006467.4	ATP5L	0|5|0|0|0|2|5|6|0|0|0|0	9|8|0|5	22	5.5	0	1	0.8
PPP1R35-BirAFlag	NP_001264.2	CHD4	34|43|99|109|95|102|129|130|83|64|125|123	83|75|101|78	337	84.25	0	0.65	0.94
PPP1R35-BirAFlag	NP_001005271.2	CHD3	0|0|0|0|3|0|4|5|0|0|12|3	3|0|0|0	3	0.75	0	0.09	0.91
PPP1R35-BirAFlag	NP_005902.1	MAT2A	3|5|4|4|7|8|0|0|0|0|2|2	5|0|4|4	13	3.25	0	0.43	0.89
PPP1R35-BirAFlag	NP_005911.1	MEF2D	2|2|0|2|6|6|17|20|11|10|8|8	5|6|2|0	13	3.25	0	0.18	0.94
PPP1R35-BirAFlag	NP_006381.2	IPO8	0|0|0|4|0|0|0|0|0|0|0|0	13|13|31|23	80	20	0.81	10	0.04
PPP1R35-BirAFlag	NP_057087.2	WIPI2	18|17|39|38|23|24|49|57|33|32|54|38	29|25|23|31	108	27	0	0.49	0.94
PPP1R35-BirAFlag	NP_036565.2	SF3B1	32|39|85|89|81|82|126|124|67|69|138|121	62|61|72|76	271	67.75	0	0.51	0.94
PPP1R35-BirAFlag	NP_212132.2	DOCK7	0|2|4|5|11|11|16|11|5|0|12|10	7|4|9|8	28	7	0	0.5	0.92
PPP1R35-BirAFlag	NP_001005751.1	FAM21A	2|3|13|12|6|12|23|21|0|6|22|29	23|25|20|13	81	20.25	0	0.78	0.93
PPP1R35-BirAFlag	NP_006422.1	CCT2	44|47|110|100|76|82|65|66|55|68|102|99	131|143|176|191	641	160.25	0	1.51	0.94
PPP1R35-BirAFlag	NP_006456.1	ARID3B	7|6|22|15|24|24|37|38|14|22|30|23	27|21|13|14	75	18.75	0	0.5	0.94
PPP1R35-BirAFlag	NP_006451.1	HEXIM1	0|0|0|0|6|4|8|12|0|0|0|0	10|10|0|3	23	5.75	0	0.57	0.89
PPP1R35-BirAFlag	NP_006136.1	DNAJB1	13|9|39|39|20|19|86|77|38|44|81|76	36|32|14|18	100	25	0	0.3	0.94
PPP1R35-BirAFlag	NP_006144.1	NCK1	5|5|10|14|21|21|48|44|19|22|29|20	35|35|12|15	97	24.25	0	0.53	0.94
PPP1R35-BirAFlag	NP_003572.2	NCK2	0|2|0|0|0|0|10|11|3|3|6|0	3|2|0|0	5	1.25	0	0.12	0.92
PPP1R35-BirAFlag	NP_006296.1	ANP32A	0|0|0|0|0|7|0|0|0|0|6|2	15|0|0|0	15	3.75	0	0.58	0.73
PPP1R35-BirAFlag	NP_006237.1	PPP2R5E	0|0|0|0|0|0|0|0|0|0|0|0	13|10|5|4	32	8	1	80	0
PPP1R35-BirAFlag	NP_006319.1	RBM14	7|8|10|8|33|32|8|8|4|4|4|3	34|34|7|9	84	21	0	0.65	0.93
PPP1R35-BirAFlag	NP_001185774.1	RBM14-RBM4	0|0|0|0|0|0|0|0|0|0|0|0	3|0|0|0	3	0.75	0.24	7.5	0.49
PPP1R35-BirAFlag	NP_006273.1	STK4	5|5|14|9|7|6|14|15|16|12|17|21	6|6|8|9	29	7.25	0	0.38	0.94
PPP1R35-BirAFlag	AP_000199.1	56160532	70|72|123|119|194|197|84|82|44|42|43|41	147|157|128|128	560	140	0	0.72	0.94
PPP1R35-BirAFlag	NP_006537.3	IGF2BP1	22|21|25|29|46|44|45|43|32|20|26|23	46|49|27|28	150	37.5	0	0.82	0.94
PPP1R35-BirAFlag	NP_002130.2	RBMX	10|11|14|15|19|17|16|16|10|11|13|14	12|12|8|9	41	10.25	0	0.57	0.94
PPP1R35-BirAFlag	NP_006073.2	TUBA1B	159|153|9|12|283|274|87|60|17|18|71|10	292|50|0|0	342	85.5	0	0.31	0.94
PPP1R35-BirAFlag	NP_006588.1	HSPA8	80|85|142|134|151|155|140|154|108|129|168|126	202|201|217|182	802	200.5	0	1.24	0.94
PPP1R35-BirAFlag	NP_068814.2	HSPA2	0|0|0|0|0|0|0|2|0|0|0|0	7|6|5|5	23	5.75	0.44	5.75	0.35
PPP1R35-BirAFlag	NP_006550.1	KHDRBS1	11|11|38|27|15|15|11|10|13|14|35|35	9|11|18|21	59	14.75	0	0.4	0.94
PPP1R35-BirAFlag	NP_055824.1	PDZRN3	0|0|0|0|0|0|0|0|0|0|0|0	4|4|3|5	16	4	0.98	40	0
PPP1R35-BirAFlag	NP_055950.1	NUP205	0|5|14|15|11|11|10|9|8|9|10|20	24|21|17|16	78	19.5	0	1.11	0.91
PPP1R35-BirAFlag	NP_110379.2	TCP1	76|61|103|107|125|129|114|116|86|92|107|99	163|161|128|129	581	145.25	0	1.14	0.94
PPP1R35-BirAFlag	NP_006792.1	KDELR1	0|0|0|0|0|0|0|0|0|0|0|0	2|3|0|0	5	1.25	0.42	12.5	0.37
PPP1R35-BirAFlag	NP_006741.1	SNTB2	0|0|0|4|3|3|3|2|0|3|0|0	3|4|5|0	12	3	0	0.86	0.78
PPP1R35-BirAFlag	NP_006749.1	U2AF1	0|9|4|14|17|16|15|15|0|9|14|14	13|14|10|8	45	11.25	0	0.68	0.92
PPP1R35-BirAFlag	NP_006752.1	YWHAE	8|5|15|13|17|14|27|28|11|12|17|17	23|22|16|8	69	17.25	0	0.63	0.93
PPP1R35-BirAFlag	NP_001129171.1	YWHAZ	0|0|11|9|5|5|5|8|2|0|11|10	10|8|8|11	37	9.25	0	0.84	0.9
PPP1R35-BirAFlag	NP_647539.1	YWHAB	0|0|8|0|0|2|3|0|0|0|10|7	4|6|9|0	19	4.75	0	0.53	0.89
PPP1R35-BirAFlag	NP_006817.1	YWHAQ	0|0|0|7|3|0|2|2|0|0|7|7	4|6|0|6	16	4	0	0.57	0.87
PPP1R35-BirAFlag	NP_036611.2	YWHAG	0|0|0|3|0|0|5|2|0|0|0|4	2|2|3|0	7	1.75	0	0.39	0.85
PPP1R35-BirAFlag	NP_003396.1	YWHAH	0|0|0|0|0|0|5|6|0|2|3|0	2|0|0|0	2	0.5	0	0.09	0.88
PPP1R35-BirAFlag	NP_004406.2	DSP	5|6|28|20|57|53|26|24|8|14|29|34	15|14|21|34	84	21	0	0.38	0.94
PPP1R35-BirAFlag	NP_009017.1	WDHD1	2|0|0|0|4|6|13|17|5|4|9|9	2|3|3|3	11	2.75	0	0.18	0.94
PPP1R35-BirAFlag	NP_008975.1	KATNA1	0|3|4|0|2|3|12|12|8|10|10|10	5|3|0|2	10	2.5	0	0.21	0.94
PPP1R35-BirAFlag	NP_009106.1	ERLIN2	11|10|15|12|21|17|9|7|9|9|8|8	18|19|9|6	52	13	0	0.68	0.92
PPP1R35-BirAFlag	NP_001611.1	AHNAK	236|245|414|395|563|547|629|621|313|344|415|428	246|228|191|205	870	217.5	0	0.35	0.94
PPP1R35-BirAFlag	NP_005078.2	FXR1	6|8|12|11|24|29|21|15|14|15|13|20	19|17|8|10	54	13.5	0	0.51	0.93
PPP1R35-BirAFlag	NP_003371.2	VIM	83|81|130|137|207|183|204|208|92|104|108|131	138|127|89|74	428	107	0	0.52	0.94
PPP1R35-BirAFlag	NP_005465.2	HDAC5	0|0|0|0|0|4|2|3|0|0|0|5	4|2|0|0	6	1.5	0	0.33	0.84
PPP1R35-BirAFlag	NP_005989.3	CCT3	50|54|90|94|88|82|81|81|55|65|73|79	130|113|122|104	469	117.25	0	1.27	0.94
PPP1R35-BirAFlag	NP_000273.2	PCCA	219|241|384|404|498|516|121|111|103|83|117|91	276|265|206|222	969	242.25	0	0.48	0.94
PPP1R35-BirAFlag	NP_001018077.1	SERBP1	37|34|42|48|50|58|119|142|75|65|75|71	46|53|33|29	161	40.25	0	0.31	0.94
PPP1R35-BirAFlag	NP_056014.2	ANKRD28	6|7|10|7|10|10|6|7|12|11|11|7	12|15|22|22	71	17.75	0	1.54	0.83
PPP1R35-BirAFlag	NP_775866.2	ANKRD52	0|2|2|3|4|0|2|0|4|0|0|0	4|2|10|13	29	7.25	0.17	1.81	0.62
PPP1R35-BirAFlag	NP_001883.4	CSNK1A1	2|8|7|6|12|7|6|5|6|7|12|14	4|7|18|10	39	9.75	0	0.75	0.89
PPP1R35-BirAFlag	NP_006865.1	ELF2	0|0|0|0|0|0|15|11|12|14|11|13	8|10|2|2	22	5.5	0	0.38	0.92
PPP1R35-BirAFlag	NP_001560.2	IRAK1	14|12|32|29|19|23|26|26|18|22|23|36	26|26|26|21	99	24.75	0	0.73	0.94
PPP1R35-BirAFlag	NP_001186326.1	NEK1	0|0|0|3|4|2|7|6|0|2|2|0	3|3|6|5	17	4.25	0	0.65	0.87
PPP1R35-BirAFlag	NP_036218.1	GTF3C3	0|0|4|0|3|4|8|7|0|4|6|8	4|3|12|7	26	6.5	0	0.81	0.85
PPP1R35-BirAFlag	NP_036448.1	KPNA6	6|5|4|4|14|10|12|13|14|9|9|4	11|13|11|13	48	12	0	0.86	0.91
PPP1R35-BirAFlag	NP_002255.3	KPNA1	0|0|3|0|0|0|0|0|0|0|5|12	4|4|0|0	8	2	0	0.24	0.9
PPP1R35-BirAFlag	NP_036457.1	MAPRE1	7|5|9|8|11|8|38|38|31|31|36|31	28|27|11|13	79	19.75	0	0.52	0.94
PPP1R35-BirAFlag	NP_055083.1	MAPRE2	0|0|13|10|8|3|24|17|0|6|19|12	6|7|11|9	33	8.25	0	0.38	0.93
PPP1R35-BirAFlag	NP_036555.1	RPL13A	13|12|18|13|41|39|39|44|8|7|16|13	47|47|20|18	132	33	0	0.78	0.94
PPP1R35-BirAFlag	NP_037468.1	SEC61A1	2|3|4|5|4|5|0|0|2|3|4|5	4|4|0|0	8	2	0	0.4	0.85
PPP1R35-BirAFlag	NP_003622.2	PARG	2|2|9|12|5|6|22|16|11|9|13|14	2|0|0|0	2	0.5	0	0.03	0.94
PPP1R35-BirAFlag	NP_001020764.1	ARFIP1	6|7|12|7|9|8|13|13|4|0|3|4	13|12|5|5	35	8.75	0	0.67	0.91
PPP1R35-BirAFlag	NP_003477.4	SLC7A5	0|0|0|0|5|0|6|4|0|0|0|0	6|7|2|0	15	3.75	0	0.68	0.83
PPP1R35-BirAFlag	NP_055227.1	CACYBP	10|9|27|16|12|8|16|10|16|21|27|32	30|24|26|21	101	25.25	0	0.86	0.93
PPP1R35-BirAFlag	NP_055317.1	PRPF19	8|12|27|30|21|20|21|21|11|12|38|29	15|15|22|23	75	18.75	0	0.55	0.94
PPP1R35-BirAFlag	NP_055554.1	BCLAF1	5|6|29|42|30|32|84|19|33|34|59|55	34|31|22|13	100	25	0	0.35	0.94
PPP1R35-BirAFlag	NP_055643.1	TOX4	24|29|50|57|73|75|80|79|34|37|75|71	60|61|34|39	194	48.5	0	0.61	0.94
PPP1R35-BirAFlag	NP_002037.2	GAPDH	43|40|94|81|93|99|65|52|59|47|64|78	79|83|55|68	285	71.25	0	0.74	0.94
PPP1R35-BirAFlag	NP_057457.1	WWOX	46|53|86|79|95|100|23|25|45|43|39|28	41|41|20|16	118	29.5	0	0.3	0.94
PPP1R35-BirAFlag	NP_001032238.1	ACOT1	30|28|51|54|34|35|42|37|50|49|64|51	26|23|0|0	49	12.25	0	0.21	0.94
PPP1R35-BirAFlag	NP_068579.3	EXOC4	2|0|9|8|14|16|18|13|6|2|16|21	26|25|21|26	98	24.5	0	1.26	0.91
PPP1R35-BirAFlag	NP_004593.2	STAU1	3|6|11|12|15|13|18|13|3|5|5|10	23|23|20|19	85	21.25	0	1.29	0.9
PPP1R35-BirAFlag	NP_037486.2	CNOT7	0|0|4|3|0|0|0|0|0|0|5|5	6|6|3|6	21	5.25	0	1.05	0.82
PPP1R35-BirAFlag	NP_056044.3	KIAA0664	6|3|7|4|5|4|14|14|13|10|4|7	28|24|25|28	105	26.25	0	1.88	0.83
PPP1R35-BirAFlag	NP_001034764.1	UNC45A	21|24|33|26|31|28|39|38|22|23|17|24	65|58|46|50	219	54.75	0	1.42	0.92
PPP1R35-BirAFlag	NP_060654.1	ARL8B	0|0|0|0|2|2|5|4|0|0|0|0	10|9|0|0	19	4.75	0	1.06	0.73
PPP1R35-BirAFlag	NP_060802.1	DDX19A	0|0|0|0|0|0|0|0|0|0|0|0	9|10|0|0	19	4.75	0.5	47.5	0.21
PPP1R35-BirAFlag	NP_060018.1	CDV3	7|7|10|15|13|18|27|31|14|13|30|25	10|8|2|0	20	5	0	0.16	0.94
PPP1R35-BirAFlag	NP_001034797.1	SDCCAG3	0|0|2|0|0|2|5|5|0|4|12|9	32|25|32|28	117	29.25	0.54	2.79	0.18
PPP1R35-BirAFlag	NP_006436.3	PRPF8	33|34|117|109|131|113|104|101|59|59|121|105	83|92|124|124	423	105.75	0	0.84	0.94
PPP1R35-BirAFlag	NP_000678.1	AHCY	0|5|8|9|4|5|11|11|5|4|10|13	10|10|7|10	37	9.25	0	0.77	0.91
PPP1R35-BirAFlag	NP_722517.3	C10orf46	0|0|0|0|0|0|4|0|0|0|0|2	4|2|0|0	6	1.5	0	0.5	0.78
PPP1R35-BirAFlag	NP_001000.2	RPS5	0|0|2|0|3|4|0|0|0|0|0|4	3|0|0|0	3	0.75	0	0.19	0.84
PPP1R35-BirAFlag	NP_001007.2	RPS12	0|0|8|10|4|5|8|8|0|5|11|14	4|5|9|9	27	6.75	0	0.54	0.91
PPP1R35-BirAFlag	NP_055984.1	RRS1	0|0|5|8|2|0|20|20|4|6|6|8	5|6|0|0	11	2.75	0	0.14	0.94
PPP1R35-BirAFlag	NP_001091872.1	ZNF295	0|0|0|0|0|0|2|0|0|0|0|0	2|0|0|0	2	0.5	0.01	0.5	0.7
PPP1R35-BirAFlag	NP_057475.2	NOP16	0|0|5|8|3|2|4|6|0|0|0|5	2|0|0|3	5	1.25	0	0.18	0.9
PPP1R35-BirAFlag	NP_056229.2	RPL36	4|6|6|7|10|11|0|7|6|5|4|5	6|0|7|6	19	4.75	0	0.45	0.91
PPP1R35-BirAFlag	NP_002254.2	KIFC1	0|0|0|0|0|0|24|23|2|0|6|4	2|0|0|0	2	0.5	0	0.02	0.94
PPP1R35-BirAFlag	NP_570967.1	DYNLRB2	0|0|0|0|0|0|0|0|0|0|0|0	5|6|0|0	11	2.75	0.5	27.5	0.24
PPP1R35-BirAFlag	NP_055332.3	UBP1	0|0|3|4|0|0|11|10|7|0|12|12	14|6|4|4	28	7	0	0.58	0.9
PPP1R35-BirAFlag	NP_001121901.1	SMARCAD1	0|0|0|0|0|0|4|3|0|0|0|0	3|4|8|7	22	5.5	0.01	1.57	0.72
PPP1R35-BirAFlag	NP_001123892.1	SMARCC2	0|0|4|0|6|3|11|12|0|0|2|6	7|6|4|4	21	5.25	0	0.46	0.91
PPP1R35-BirAFlag	NP_036256.2	CHORDC1	2|8|13|10|5|3|5|3|10|12|18|18	2|0|6|6	14	3.5	0	0.19	0.94
PPP1R35-BirAFlag	NP_003889.1	SYNJ2	2|0|3|4|12|10|8|7|11|13|10|9	3|3|3|2	11	2.75	0	0.22	0.94
PPP1R35-BirAFlag	NP_079184.2	WDR76	0|0|0|0|0|0|0|0|0|0|0|0	2|0|0|0	2	0.5	0.19	5	0.55
PPP1R35-BirAFlag	NP_036437.1	AP2A2	0|2|6|5|9|8|15|17|7|11|13|13	9|10|6|0	25	6.25	0	0.39	0.92
PPP1R35-BirAFlag	NP_001164633.1	ZMYM3	0|0|0|0|3|0|2|0|0|0|0|0	4|2|3|3	12	3	0	1.2	0.75
PPP1R35-BirAFlag	NP_699163.2	ERI1	0|0|0|0|0|0|0|2|0|0|0|0	2|0|0|0	2	0.5	0.01	0.5	0.7
PPP1R35-BirAFlag	NP_001191006.1	UBE4A	0|0|0|0|0|0|0|0|2|0|0|0	2|0|0|0	2	0.5	0.01	0.5	0.7
PPP1R35-BirAFlag	NP_705833.3	CRYBG3	0|0|3|0|8|5|0|0|0|0|0|6	2|2|14|16	34	8.5	0	1.21	0.74
PPP1R35-BirAFlag	NP_003375.1	VRK1	0|0|4|5|0|0|0|0|0|3|3|6	3|0|0|0	3	0.75	0	0.14	0.88
PPP1R35-BirAFlag	NP_005432.1	CHAF1B	0|0|0|0|4|2|8|9|0|0|0|3	3|2|0|0	5	1.25	0	0.15	0.91
PPP1R35-BirAFlag	NP_006017.1	H1FX	3|2|0|4|0|0|7|8|3|3|3|4	3|3|0|4	10	2.5	0	0.33	0.9
PPP1R35-BirAFlag	NP_079452.3	NINL	0|0|0|0|0|0|0|0|0|0|0|0	2|0|0|0	2	0.5	0.19	5	0.55
PPP1R35-BirAFlag	NP_006521.1	YEATS4	0|0|0|0|2|0|4|3|0|0|0|0	4|4|0|0	8	2	0	0.57	0.79
PPP1R35-BirAFlag	NP_057731.1	C8orf55	0|0|0|0|0|0|0|0|0|0|0|0	2|0|0|2	4	1	0.37	10	0.38
PPP1R35-BirAFlag	NP_085056.2	CYB5B	0|0|0|0|0|0|4|2|0|0|0|0	3|3|0|0	6	1.5	0	0.5	0.79
PPP1R35-BirAFlag	NP_038477.2	BAZ2A	0|0|0|0|3|0|7|7|0|0|2|2	3|5|0|0	8	2	0	0.29	0.89
PPP1R35-BirAFlag	NP_000099.2	DLD	3|2|8|12|0|0|0|0|0|6|6|3	3|5|0|0	8	2	0	0.2	0.91
PPP1R35-BirAFlag	NP_055520.3	DOCK4	0|0|0|3|4|2|0|0|0|0|3|0	6|6|8|7	27	6.75	0.01	1.93	0.72
PPP1R35-BirAFlag	NP_001035526.1	YARS2	2|0|8|9|0|0|0|0|0|0|0|0	3|0|0|0	3	0.75	0	0.09	0.91
PPP1R35-BirAFlag	NP_001036816.1	TPM3	2|3|2|0|6|8|9|10|2|3|0|0	5|0|0|0	5	1.25	0	0.13	0.91
PPP1R35-BirAFlag	NP_002959.2	SALL1	0|0|0|0|0|0|0|0|0|0|0|0	3|2|0|0	5	1.25	0.42	12.5	0.37
PPP1R35-BirAFlag	NP_001941.2	E2F4	0|0|0|0|0|0|2|0|0|0|0|0	4|3|0|4	11	2.75	0.12	2.75	0.62
PPP1R35-BirAFlag	NP_742112.1	CAMK2D	0|0|0|2|0|0|5|3|0|0|0|0	2|2|0|0	4	1	0	0.25	0.85
PPP1R35-BirAFlag	NP_037460.2	PYCR2	0|0|0|0|0|0|0|0|0|0|0|0	3|3|0|0	6	1.5	0.47	15	0.34
PPP1R35-BirAFlag	NP_110416.1	HM13	0|0|8|10|0|0|0|0|0|4|14|13	4|0|0|0	4	1	0	0.07	0.94
PPP1R35-BirAFlag	NP_067635.2	PLEKHA1	4|4|7|10|5|6|24|32|16|20|22|17	5|5|0|0	10	2.5	0	0.09	0.94
PPP1R35-BirAFlag	NP_057019.3	METTL13	0|0|0|0|0|0|0|0|0|0|0|0	2|2|0|0	4	1	0.37	10	0.38
PPP1R35-BirAFlag	NP_001687.1	ATP6V1E1	5|4|13|10|8|7|10|11|10|11|12|12	10|8|13|11	42	10.5	0	0.84	0.9
PPP1R35-BirAFlag	NP_001474.1	GBAS	0|0|0|0|0|0|0|0|0|0|0|0	6|5|0|0	11	2.75	0.5	27.5	0.24
PPP1R35-BirAFlag	NP_001035542.1	RUFY1	0|0|0|0|3|4|18|11|0|0|0|6	5|3|0|0	8	2	0	0.14	0.93
PPP1R35-BirAFlag	NP_001094058.1	RC3H2	0|0|0|0|0|0|3|3|0|0|0|0	5|0|0|0	5	1.25	0	0.42	0.76
PPP1R35-BirAFlag	NP_002803.2	PSMD8	5|5|11|7|2|3|13|12|8|11|20|16	3|4|5|3	15	3.75	0	0.21	0.94
PPP1R35-BirAFlag	NP_009190.2	VPS45	2|0|9|4|0|0|8|8|0|0|4|4	4|3|0|0	7	1.75	0	0.21	0.9
PPP1R35-BirAFlag	NP_003065.3	SMARCC1	0|0|0|3|0|0|10|9|3|3|3|3	7|0|3|0	10	2.5	0	0.26	0.9
PPP1R35-BirAFlag	NP_004597.2	TAF1	0|0|5|10|5|0|11|12|5|3|2|2	5|2|0|2	9	2.25	0	0.2	0.92
PPP1R35-BirAFlag	NP_115571.1	SON	8|7|24|26|34|40|46|44|9|12|17|17	5|7|0|5	17	4.25	0	0.09	0.94
PPP1R35-BirAFlag	NP_079463.2	C16orf70	0|0|0|2|4|0|7|5|5|4|6|6	2|3|0|0	5	1.25	0	0.19	0.94
PPP1R35-BirAFlag	NP_659492.1	C18orf25	0|0|0|0|0|0|5|5|0|0|2|0	2|0|0|0	2	0.5	0	0.1	0.87
PPP1R35-BirAFlag	NP_001185727.1	ASCC1	0|0|4|5|7|8|0|0|0|0|2|0	5|5|0|0	10	2.5	0	0.33	0.89
PPP1R35-BirAFlag	NP_056224.3	EP400	0|0|0|0|3|2|2|2|0|3|2|5	2|0|0|0	2	0.5	0	0.12	0.85
PPP1R35-BirAFlag	NP_001244118.1	DDX56	0|3|6|7|3|4|5|6|6|3|0|8	3|3|2|0	8	2	0	0.27	0.94
PPP1R35-BirAFlag	NP_001790.1	CDK7	2|0|9|5|3|0|15|12|10|0|16|18	5|4|3|0	12	3	0	0.18	0.94
PPP1R35-BirAFlag	NP_000091.1	CSTB	4|6|8|7|14|12|0|0|2|0|0|2	3|2|6|5	16	4	0	0.31	0.92
PPP1R35-BirAFlag	NP_005768.1	RBM6	0|0|0|0|0|0|10|10|0|0|3|0	3|4|0|0	7	1.75	0	0.17	0.91
PPP1R35-BirAFlag	NP_005990.1	TSNAX	6|5|8|9|4|5|14|11|10|8|18|17	4|9|0|0	13	3.25	0	0.19	0.94
PPP1R35-BirAFlag	NP_006338.1	PPIH	2|2|0|0|0|0|15|16|0|0|6|8	8|8|2|0	18	4.5	0	0.29	0.92
PPP1R35-BirAFlag	NP_077005.2	WDR18	0|0|3|4|0|0|7|6|0|0|5|0	5|6|0|0	11	2.75	0	0.42	0.87
PPP1R35-BirAFlag	NP_006345.1	TADA3	0|0|0|0|0|0|14|14|7|7|5|5	4|2|0|2	8	2	0	0.14	0.94
PPP1R35-BirAFlag	NP_115737.1	THOC3	0|0|0|0|3|4|0|0|0|3|4|5	2|0|0|0	2	0.5	0	0.11	0.86
PPP1R35-BirAFlag	NP_001122324.1	SRRT	0|0|0|0|0|0|6|3|6|0|0|5	4|0|0|0	4	1	0	0.17	0.88
PPP1R35-BirAFlag	NP_057458.4	ARID4B	0|0|0|0|2|0|11|7|0|0|0|0	2|2|0|0	4	1	0	0.11	0.91
PPP1R35-BirAFlag	NP_055862.1	KIAA0090	2|4|5|5|0|0|12|9|4|4|10|11	3|4|0|0	7	1.75	0	0.15	0.94
PPP1R35-BirAFlag	NP_077734.1	PLA2G4A	0|0|0|2|0|0|18|21|16|20|29|21	3|0|3|3	9	2.25	0	0.09	0.94
PPP1R35-BirAFlag	NP_005887.2	IDH1	0|3|11|8|3|0|7|5|11|5|23|19	3|0|0|0	3	0.75	0	0.04	0.94
PPP1R35-BirAFlag	NP_054808.1	NUPL1	0|0|0|0|5|4|6|7|8|5|0|8	9|7|11|8	35	8.75	0	1.09	0.86
PPP1R35-BirAFlag	NP_109590.3	RAI1	0|0|0|0|0|0|4|7|0|0|0|0	2|2|0|0	4	1	0	0.18	0.88
PPP1R35-BirAFlag	NP_065921.2	SH3RF1	0|0|0|0|2|0|2|0|0|0|0|0	3|0|2|0	5	1.25	0	0.62	0.75
PPP1R35-BirAFlag	NP_056990.3	TRIM33	0|0|3|4|2|0|8|8|0|2|7|7	6|7|0|3	16	4	0	0.5	0.89
PPP1R35-BirAFlag	NP_037397.2	C11orf2	0|0|6|0|0|0|0|0|0|0|0|0	3|3|2|0	8	2	0	0.67	0.78
PPP1R35-BirAFlag	NP_058518.1	MAPT	2|4|3|3|0|0|25|25|0|9|14|15	8|5|0|0	13	3.25	0	0.13	0.94
PPP1R35-BirAFlag	NP_001076045.1	RBFOX2	0|2|0|0|0|0|0|0|0|0|0|0	2|0|0|0	2	0.5	0.01	0.5	0.7
PPP1R35-BirAFlag	NP_060723.2	YY1AP1	0|0|0|0|0|0|0|0|0|3|0|0	2|3|0|2	7	1.75	0.01	1.17	0.69
PPP1R35-BirAFlag	NP_722560.1	PTK2	0|2|2|3|0|0|4|0|0|3|3|0	4|5|4|4	17	4.25	0	1.21	0.78
PPP1R35-BirAFlag	NP_005008.2	PCYT1A	0|0|0|0|0|0|13|13|6|4|7|5	2|2|0|0	4	1	0	0.08	0.94
PPP1R35-BirAFlag	NP_056943.1	GTF2A1	8|9|18|16|4|4|13|13|9|10|36|41	7|10|14|15	46	11.5	0	0.3	0.94
PPP1R35-BirAFlag	NP_003923.2	ST13	3|2|5|5|0|0|6|6|3|0|3|3	4|5|3|2	14	3.5	0	0.58	0.87
PPP1R35-BirAFlag	NP_659415.1	CCDC138	0|0|0|0|0|0|0|0|0|0|0|0	3|0|0|0	3	0.75	0.24	7.5	0.49
PPP1R35-BirAFlag	NP_001369.1	DYNC1I2	0|0|0|0|2|3|4|5|0|0|0|0	2|4|0|0	6	1.5	0	0.33	0.84
PPP1R35-BirAFlag	NP_734467.1	C11orf31	0|0|0|0|0|0|0|0|0|0|0|0	2|0|0|0	2	0.5	0.19	5	0.55
PPP1R35-BirAFlag	NP_001231867.1	TXN	6|0|3|4|14|12|8|10|0|0|0|0	10|9|0|5	24	6	0	0.46	0.91
PPP1R35-BirAFlag	NP_003812.1	RIPK2	5|3|6|7|3|6|7|6|10|7|10|9	2|0|0|0	2	0.5	0	0.05	0.94
PPP1R35-BirAFlag	NP_758440.1	POC1B	0|0|0|0|0|0|0|0|0|0|3|0	3|0|0|0	3	0.75	0.01	0.5	0.71
PPP1R35-BirAFlag	NP_067077.1	C21orf59	0|0|0|0|0|0|5|6|0|2|8|6	5|0|0|0	5	1.25	0	0.18	0.89
PPP1R35-BirAFlag	NP_006699.2	GLO1	3|5|4|6|0|5|7|7|5|7|8|9	5|0|0|0	5	1.25	0	0.15	0.94
PPP1R35-BirAFlag	NP_057136.2	RRP15	0|0|4|3|0|0|10|9|2|0|3|2	2|0|0|2	4	1	0	0.11	0.94
PPP1R35-BirAFlag	NP_115604.1	FAR1	2|2|7|2|4|5|0|0|2|3|3|0	3|3|2|0	8	2	0	0.33	0.88
PPP1R35-BirAFlag	NP_055428.1	FAF2	0|0|0|0|2|0|0|0|0|0|0|0	2|0|0|0	2	0.5	0.01	0.5	0.7
PPP1R35-BirAFlag	NP_002938.1	RPA3	0|0|6|8|0|0|15|12|11|11|13|14	3|3|2|0	8	2	0	0.14	0.94
PPP1R35-BirAFlag	NP_004166.1	SNRPD3	0|0|5|8|10|8|8|6|0|0|8|7	5|5|7|8	25	6.25	0	0.69	0.89
PPP1R35-BirAFlag	NP_060842.3	LRIF1	0|0|0|0|0|0|0|0|0|0|0|0	3|4|5|0	12	3	0.73	30	0.09
PPP1R35-BirAFlag	NP_056169.1	NUP188	0|0|3|4|0|0|0|2|2|4|9|8	5|3|6|6	20	5	0	0.59	0.9
PPP1R35-BirAFlag	NP_054727.1	CCDC22	0|0|3|0|2|0|0|0|0|0|0|3	3|0|6|4	13	3.25	0	1.08	0.74
PPP1R35-BirAFlag	NP_001034554.1	SRSF5	0|0|0|0|0|0|0|2|0|0|0|0	2|0|0|0	2	0.5	0.01	0.5	0.7
PPP1R35-BirAFlag	NP_079223.3	PHC3	0|0|0|0|0|0|0|0|0|0|0|0	4|4|0|0	8	2	0.5	20	0.29
PPP1R35-BirAFlag	NP_663722.1	APBB1	0|5|5|5|7|5|16|18|7|16|15|15	4|9|10|7	30	7.5	0	0.44	0.93
PPP1R35-BirAFlag	NP_001138916.1	SCAF4	3|2|11|11|7|9|9|10|8|8|0|10	6|5|0|0	11	2.75	0	0.25	0.94
PPP1R35-BirAFlag	NP_689853.3	DCP1B	0|4|8|6|9|6|0|0|4|0|3|0	5|5|10|8	28	7	0	0.82	0.88
PPP1R35-BirAFlag	NP_002004.1	FKBP3	6|8|7|7|4|4|8|8|14|13|20|14	4|3|2|0	9	2.25	0	0.13	0.94
PPP1R35-BirAFlag	NP_004587.1	SNRPA	0|4|5|7|11|9|8|8|5|11|8|6	8|5|14|14	41	10.25	0	0.93	0.89
PPP1R35-BirAFlag	NP_001012680.1	SLC3A2	0|0|6|8|0|0|3|0|4|0|7|13	2|0|0|2	4	1	0	0.1	0.94
PPP1R35-BirAFlag	NP_001087194.1	MEX3A	0|0|0|0|0|0|0|0|0|0|0|0	2|0|0|0	2	0.5	0.19	5	0.55
PPP1R35-BirAFlag	NP_036429.2	G3BP2	0|0|3|0|6|7|5|0|0|0|3|5	9|9|7|6	31	7.75	0	1.19	0.83
PPP1R35-BirAFlag	NP_001884.2	CSNK1D	3|0|6|5|2|0|5|7|4|3|0|6	6|0|10|9	25	6.25	0	0.96	0.82
PPP1R35-BirAFlag	NP_002430.3	MSH3	2|0|5|6|3|2|6|5|2|3|0|8	3|0|0|4	7	1.75	0	0.25	0.89
PPP1R35-BirAFlag	NP_001252532.1	MORF4L1	0|0|0|0|0|0|6|0|0|3|3|2	3|0|0|0	3	0.75	0	0.17	0.85
PPP1R35-BirAFlag	NP_071801.1	XRCC4	0|0|2|0|0|0|7|4|0|0|4|3	2|0|0|0	2	0.5	0	0.09	0.88
PPP1R35-BirAFlag	NP_076418.3	ZBTB10	0|0|0|0|0|0|0|3|0|0|0|0	3|0|0|0	3	0.75	0.01	0.5	0.71
PPP1R35-BirAFlag	NP_001018865.2	IQCB1	0|0|2|0|0|0|3|2|0|2|3|0	3|9|4|0	16	4	0.06	1.33	0.64
PPP1R35-BirAFlag	NP_115810.2	ZNF512	0|0|2|0|0|0|18|16|14|8|13|10	3|2|0|2	7	1.75	0	0.1	0.94
PPP1R35-BirAFlag	NP_055067.1	SLC25A15	0|0|0|0|0|0|0|0|0|0|0|0	4|0|0|0	4	1	0.25	10	0.45
PPP1R35-BirAFlag	NP_055532.1	ZNF536	0|0|0|0|0|0|0|2|0|0|0|0	3|4|5|0	12	3	0.15	3	0.62
PPP1R35-BirAFlag	NP_076982.3	SECISBP2	0|0|0|0|0|0|0|0|0|0|0|0	3|0|7|3	13	3.25	0.72	32.5	0.1
PPP1R35-BirAFlag	NP_001136402.1	API5	2|2|5|0|2|0|12|15|11|4|16|9	2|2|3|0	7	1.75	0	0.11	0.94
PPP1R35-BirAFlag	NP_115517.1	NSRP1	0|0|2|0|0|0|16|13|3|3|5|5	2|0|0|0	2	0.5	0	0.03	0.94
PPP1R35-BirAFlag	NP_536724.1	PIGU	0|0|0|0|0|0|0|0|0|0|4|0	2|0|0|0	2	0.5	0	0.25	0.76
PPP1R35-BirAFlag	NP_005975.1	SLC25A1	5|5|17|13|12|10|8|8|7|0|10|10	5|0|0|0	5	1.25	0	0.08	0.94
PPP1R35-BirAFlag	NP_005861.2	SAP18	3|0|0|0|0|0|19|15|0|0|0|0	3|4|0|0	7	1.75	0	0.1	0.93
PPP1R35-BirAFlag	NP_001160072.1	FAM122B	0|0|0|0|0|0|6|6|6|4|5|0	4|0|0|0	4	1	0	0.17	0.88
PPP1R35-BirAFlag	NP_036440.1	KDM2A	0|0|0|0|0|0|7|9|9|0|2|2	4|5|0|0	9	2.25	0	0.25	0.9
PPP1R35-BirAFlag	NP_056324.2	NECAP1	0|0|0|0|0|0|7|0|0|0|0|0	2|3|0|0	5	1.25	0	0.36	0.81
PPP1R35-BirAFlag	NP_795352.2	INADL	0|0|0|0|0|0|0|0|0|0|0|0	2|3|4|5	14	3.5	0.92	35	0.02
PPP1R35-BirAFlag	NP_003696.2	SLC25A12	0|0|0|0|0|0|4|4|0|0|0|0	6|4|0|0	10	2.5	0	0.62	0.79
PPP1R35-BirAFlag	NP_060102.1	CDKN2AIP	0|0|2|0|0|0|8|12|0|2|3|2	2|2|0|0	4	1	0	0.1	0.94
PPP1R35-BirAFlag	NP_001257368.1	ARPC5	0|0|0|0|0|0|0|0|0|0|0|4	2|0|0|0	2	0.5	0	0.25	0.76
PPP1R35-BirAFlag	NP_001803.2	CENPC1	0|0|0|0|0|0|10|10|3|0|2|0	3|0|0|0	3	0.75	0	0.07	0.92
PPP1R35-BirAFlag	NP_056138.1	UFL1	3|6|7|10|0|0|7|8|6|6|6|6	2|7|0|0	9	2.25	0	0.25	0.9
PPP1R35-BirAFlag	NP_878908.4	WASH1	0|0|0|0|0|0|0|0|0|0|0|0	2|0|3|3	8	2	0.66	20	0.14
PPP1R35-BirAFlag	NP_002798.2	PSMD1	8|12|36|30|19|21|5|5|8|4|5|8	4|0|4|6	14	3.5	0	0.11	0.94
PPP1R35-BirAFlag	NP_078887.2	NARG2	0|0|0|0|0|0|6|5|0|3|3|3	2|0|0|0	2	0.5	0	0.09	0.88
PPP1R35-BirAFlag	NP_065894.2	SCAPER	0|0|0|0|0|0|0|0|0|0|0|0	2|0|0|0	2	0.5	0.19	5	0.55
PPP1R35-BirAFlag	NP_067640.2	SENP2	0|0|0|0|0|0|2|3|0|0|4|4	2|0|0|2	4	1	0	0.25	0.85
PPP1R35-BirAFlag	NP_066273.1	BCL7A	0|0|0|0|0|0|3|3|0|0|0|0	3|3|0|0	6	1.5	0	0.5	0.79
PPP1R35-BirAFlag	NP_060298.2	COMMD4	2|0|5|6|0|0|0|0|0|3|4|4	4|0|3|6	13	3.25	0	0.59	0.85
PPP1R35-BirAFlag	NP_065812.1	RPTOR	0|2|8|3|0|0|0|0|0|0|0|0	2|0|4|5	11	2.75	0	0.5	0.85
PPP1R35-BirAFlag	NP_079157.3	SLC35E1	0|0|0|0|0|0|0|0|0|0|0|0	3|0|0|0	3	0.75	0.24	7.5	0.49
PPP1R35-BirAFlag	NP_002516.2	NRD1	0|0|0|0|0|0|0|0|0|0|0|0	2|4|0|2	8	2	0.62	20	0.15
PPP1R35-BirAFlag	NP_004770.4	CNOT8	0|0|0|0|0|0|0|0|0|0|0|0	3|4|0|4	11	2.75	0.73	27.5	0.09
PPP1R35-BirAFlag	NP_620147.1	LEO1	0|0|0|0|0|0|4|5|0|0|0|0	3|5|0|0	8	2	0	0.44	0.83
PPP1R35-BirAFlag	NP_009096.2	SF3A2	3|0|0|0|0|0|5|0|4|0|8|9	3|0|0|6	9	2.25	0	0.26	0.9
PPP1R35-BirAFlag	NP_001136157.1	ARHGAP32	0|0|0|0|0|0|0|0|0|0|0|0	3|0|0|0	3	0.75	0.24	7.5	0.49
PPP1R35-BirAFlag	NP_003289.2	NR2C2	0|0|0|0|0|0|12|12|5|3|4|5	4|2|0|0	6	1.5	0	0.12	0.92
PPP1R35-BirAFlag	NP_060764.3	CWF19L1	0|0|0|0|3|0|4|0|3|9|7|4	3|0|0|0	3	0.75	0	0.09	0.91
PPP1R35-BirAFlag	NP_008964.3	RER1	0|0|0|5|0|0|0|4|3|0|2|3	5|0|2|0	7	1.75	0	0.39	0.83
PPP1R35-BirAFlag	NP_055527.1	SETD1A	0|0|0|0|2|0|0|5|0|0|0|0	3|4|0|0	7	1.75	0	0.5	0.8
PPP1R35-BirAFlag	NP_076922.1	HOXB9	0|0|0|0|0|0|2|0|4|0|0|0	3|2|0|0	5	1.25	0	0.42	0.8
PPP1R35-BirAFlag	NP_036329.3	RABGAP1	0|0|3|3|3|0|4|4|3|0|2|2	2|0|0|0	2	0.5	0	0.12	0.94
PPP1R35-BirAFlag	NP_004956.5	HMGN1	0|0|0|0|0|3|0|0|0|0|0|0	2|0|0|0	2	0.5	0	0.33	0.73
PPP1R35-BirAFlag	NP_001032895.2	NCKAP5L	0|0|0|0|0|0|0|0|0|0|0|0	2|3|0|0	5	1.25	0.42	12.5	0.37
PPP1R35-BirAFlag	NP_001165694.1	MOB2	4|4|6|4|5|6|9|0|12|7|5|10	6|0|2|2	10	2.5	0	0.23	0.94
PPP1R35-BirAFlag	NP_065101.1	UTP3	0|0|0|0|0|0|5|5|0|0|6|11	2|0|0|0	2	0.5	0	0.06	0.94
PPP1R35-BirAFlag	NP_002510.2	NPAT	0|0|2|0|0|0|11|10|0|3|0|0	2|0|0|0	2	0.5	0	0.05	0.94
PPP1R35-BirAFlag	NP_031375.3	PAXIP1	0|0|0|0|0|0|0|0|0|0|0|0	2|0|0|0	2	0.5	0.19	5	0.55
PPP1R35-BirAFlag	NP_001091680.1	CTNNB1	0|0|0|0|0|0|3|0|0|0|0|0	2|0|0|3	5	1.25	0.01	0.83	0.69
PPP1R35-BirAFlag	NP_060875.2	C17orf79	0|0|0|0|4|0|14|13|2|0|7|7	7|0|0|0	7	1.75	0	0.13	0.92
PPP1R35-BirAFlag	NP_001185594.1	ARHGEF12	0|0|0|0|0|0|4|5|0|0|0|0	2|0|0|0	2	0.5	0	0.11	0.86
PPP1R35-BirAFlag	NP_060547.2	RBM28	0|0|0|0|0|0|4|0|0|0|0|0	2|0|0|0	2	0.5	0	0.25	0.76
PPP1R35-BirAFlag	NP_006746.1	TALDO1	0|0|0|0|0|0|11|11|4|3|4|3	2|0|0|0	2	0.5	0	0.05	0.94
PPP1R35-BirAFlag	NP_009200.2	STXBP3	0|0|0|0|0|0|0|0|0|0|2|0	2|0|0|0	2	0.5	0.01	0.5	0.7
PPP1R35-BirAFlag	NP_060903.2	KDM3A	0|0|0|0|0|0|22|16|8|6|3|8	3|6|2|0	11	2.75	0	0.14	0.93
PPP1R35-BirAFlag	NP_060857.2	STRBP	0|0|0|0|0|0|0|0|0|0|0|0	2|5|0|0	7	1.75	0.44	17.5	0.36
PPP1R35-BirAFlag	NP_002084.2	GSK3B	0|0|0|0|0|0|0|0|0|0|0|0	5|6|0|0	11	2.75	0.5	27.5	0.24
PPP1R35-BirAFlag	NP_001075028.1	CPSF4	0|0|0|0|0|6|0|0|0|0|0|0	7|7|0|5	19	4.75	0.01	1.58	0.69
PPP1R35-BirAFlag	NP_001138560.1	WDR67	0|0|0|0|0|0|0|0|0|0|0|0	2|3|0|0	5	1.25	0.42	12.5	0.37
PPP1R35-BirAFlag	NP_085151.1	SETD7	0|0|0|0|0|0|4|4|3|0|4|0	2|3|0|0	5	1.25	0	0.31	0.84
PPP1R35-BirAFlag	NP_680544.1	RPP25L	0|0|5|4|0|0|0|0|0|0|0|0	4|0|0|0	4	1	0	0.22	0.84
PPP1R35-BirAFlag	NP_612395.2	NAF1	0|0|0|3|0|0|4|0|0|2|0|0	2|0|0|0	2	0.5	0	0.14	0.84
PPP1R35-BirAFlag	NP_005521.1	IDH3A	0|0|0|0|0|0|0|0|0|0|0|0	2|0|0|0	2	0.5	0.19	5	0.55
PPP1R35-BirAFlag	NP_057284.1	NAA38	3|4|7|13|3|3|9|8|8|8|15|12	5|5|4|7	21	5.25	0	0.38	0.94
PPP1R35-BirAFlag	NP_057427.3	CENPF	0|0|0|0|0|0|0|2|0|0|0|0	4|0|0|0	4	1	0.05	1	0.65
PPP1R35-BirAFlag	NP_001243353.1	GUCY1A2	0|0|0|0|0|0|0|0|0|0|0|0	4|0|0|0	4	1	0.25	10	0.45
PPP1R35-BirAFlag	NP_001135890.1	MORF4L2	0|0|0|0|0|0|0|0|2|0|5|10	2|0|0|0	2	0.5	0	0.07	0.91
PPP1R35-BirAFlag	NP_001181919.1	MEPCE	3|3|0|0|3|4|3|4|3|3|3|4	4|4|2|4	14	3.5	0	0.88	0.81
PPP1R35-BirAFlag	NP_006243.2	PRKAA2	0|0|0|0|0|0|0|0|0|0|0|0	5|0|0|0	5	1.25	0.25	12.5	0.44
PPP1R35-BirAFlag	NP_115893.1	UNC80	0|0|0|0|0|0|0|0|0|0|0|0	3|0|0|0	3	0.75	0.24	7.5	0.49
PPP1R35-BirAFlag	NP_036357.1	NUBP2	0|0|8|4|0|0|0|0|2|0|4|0	4|0|2|2	8	2	0	0.33	0.88
PPP1R35-BirAFlag	NP_004732.2	NOLC1	0|2|2|2|5|6|11|13|4|4|9|9	4|3|0|0	7	1.75	0	0.15	0.94
PPP1R35-BirAFlag	NP_001137232.1	EIF5A	3|4|21|13|10|8|27|22|23|27|48|47	7|6|7|5	25	6.25	0	0.13	0.94
PPP1R35-BirAFlag	NP_001186190.1	UCHL5	0|0|0|0|2|0|3|3|0|0|0|2	2|0|0|0	2	0.5	0	0.17	0.81
PPP1R35-BirAFlag	NP_078914.1	QTRTD1	0|0|0|0|0|0|2|2|0|0|9|5	3|0|0|0	3	0.75	0	0.11	0.9
PPP1R35-BirAFlag	NP_009231.2	BRCA1	0|0|0|0|0|0|3|3|0|0|4|3	2|0|2|2	6	1.5	0	0.43	0.83
PPP1R35-BirAFlag	NP_000990.1	RPL38	5|8|14|8|3|4|0|0|7|7|19|7	4|0|0|4	8	2	0	0.12	0.94
PPP1R35-BirAFlag	NP_997657.1	GPS1	4|0|4|4|0|4|6|0|4|0|0|0	4|0|0|0	4	1	0	0.2	0.85
PPP1R35-BirAFlag	NP_055726.3	AAK1	0|0|5|6|7|7|13|11|8|5|8|9	4|0|5|2	11	2.75	0	0.23	0.94
PPP1R35-BirAFlag	NP_057231.1	PPME1	0|0|2|0|0|0|22|17|7|7|14|11	5|0|0|0	5	1.25	0	0.06	0.94
PPP1R35-BirAFlag	NP_203754.2	TNKS1BP1	0|0|0|0|0|0|13|11|0|0|0|0	2|0|0|0	2	0.5	0	0.04	0.94
PPP1R35-BirAFlag	NP_054879.3	MKRN2	0|0|0|0|0|0|0|0|0|4|2|2	4|0|0|0	4	1	0	0.33	0.78
PPP1R35-BirAFlag	NP_055186.2	AKAP8L	0|0|3|0|5|4|0|2|0|3|2|3	3|5|0|0	8	2	0	0.44	0.83
PPP1R35-BirAFlag	NP_000986.2	RPL34	2|2|3|3|3|4|0|0|3|0|0|0	2|2|2|2	8	2	0	0.57	0.82
PPP1R35-BirAFlag	NP_001335.1	DAD1	4|0|6|0|0|0|0|0|2|0|0|5	4|0|0|0	4	1	0	0.18	0.87
PPP1R35-BirAFlag	NP_003175.1	TAF2	0|0|0|0|0|0|11|11|0|3|0|3	2|0|0|0	2	0.5	0	0.05	0.94
PPP1R35-BirAFlag	NP_055542.1	MLL4	0|0|0|0|0|0|3|2|0|0|0|0	3|0|0|0	3	0.75	0	0.3	0.78
PPP1R35-BirAFlag	NP_006651.2	CLPX	3|0|0|0|0|0|0|0|0|0|0|4	2|3|0|0	5	1.25	0	0.36	0.82
PPP1R35-BirAFlag	NP_006504.2	SARS	0|0|5|5|0|0|6|6|2|3|9|11	4|0|5|6	15	3.75	0	0.38	0.91
PPP1R35-BirAFlag	NP_996896.1	TCEB2	3|0|0|2|0|0|0|0|3|0|2|3	2|0|0|2	4	1	0	0.33	0.81
PPP1R35-BirAFlag	NP_037366.1	EIF3K	0|0|9|4|6|0|7|4|7|5|9|10	0|5|11|8	24	6	0	0.63	0.89
PPP1R35-BirAFlag	NP_060140.2	OTUB1	0|0|0|0|0|0|2|0|0|0|0|3	0|2|0|0	2	0.5	0	0.2	0.79
[truncated: 9,228 more rows]

## Sheet: FLAG-IP raw
Bait	Prey	PreyGene	ctrlCounts	Spec	SpecSum	Avg	SAINT	FoldChange	BFDR
FlagBirA-PPP1R35_AAA_FIP	NP_064528.1	PNO1	0|0|0|0|2|0|2|3|6|4|3|0	5|0|0|0	5	1.25	0	0.25	0.85
FlagBirA-PPP1R35_AAA_FIP	NP_003925.1	FUBP3	21|22|6|4|5|6|15|17|23|19|16|20	29|30|23|24	106	26.5	0	1.18	0.92
FlagBirA-PPP1R35_AAA_FIP	NP_085911.2	DDX11	0|0|0|0|0|0|2|3|5|2|0|0	3|0|0|0	3	0.75	0	0.19	0.85
FlagBirA-PPP1R35_AAA_FIP	NP_001348.2	DHX9	79|80|59|60|58|50|83|79|102|101|51|52	166|151|107|103	527	131.75	0	1.3	0.94
FlagBirA-PPP1R35_AAA_FIP	NP_064711.1	PDXP	5|7|6|5|0|0|6|7|6|4|0|4	10|4|11|7	32	8	0	1.14	0.84
FlagBirA-PPP1R35_AAA_FIP	NP_065956.1	RDH14	0|0|0|0|0|0|2|0|0|0|0|0	3|0|0|0	3	0.75	0.03	0.75	0.66
FlagBirA-PPP1R35_AAA_FIP	NP_001511.2	GTF3C1	10|4|0|0|0|0|15|13|7|8|9|8	25|21|14|16	76	19	0	1.36	0.87
FlagBirA-PPP1R35_AAA_FIP	NP_055083.1	MAPRE2	4|0|8|11|8|7|3|0|4|6|0|4	7|8|5|8	28	7	0	0.74	0.9
FlagBirA-PPP1R35_AAA_FIP	NP_008990.2	KPTN	0|0|0|0|0|0|0|4|0|0|0|0	2|0|0|0	2	0.5	0	0.25	0.77
FlagBirA-PPP1R35_AAA_FIP	NP_002408.3	MKI67	0|0|0|0|0|0|0|0|5|3|0|0	2|5|5|6	18	4.5	0	1.12	0.79
FlagBirA-PPP1R35_AAA_FIP	NP_058633.2	POLA1	10|11|0|0|0|0|19|13|15|14|4|3	17|19|18|6	60	15	0	0.88	0.91
FlagBirA-PPP1R35_AAA_FIP	NP_001737.1	CANX	75|78|95|85|85|89|101|103|93|93|86|75	74|69|51|62	256	64	0	0.63	0.94
FlagBirA-PPP1R35_AAA_FIP	NP_004609.1	TOP3A	0|0|0|0|0|0|0|0|0|2|0|0	2|0|0|0	2	0.5	0.01	0.5	0.7
FlagBirA-PPP1R35_AAA_FIP	NP_004229.1	TRIP12	0|0|0|0|0|0|3|3|4|0|5|6	5|2|3|8	18	4.5	0	0.82	0.83
FlagBirA-PPP1R35_AAA_FIP	NP_066951.1	POLR2L	5|4|0|0|0|0|4|5|4|4|5|5	5|3|0|0	8	2	0	0.4	0.85
FlagBirA-PPP1R35_AAA_FIP	NP_066964.1	XRCC5	57|54|21|14|21|21|81|68|109|102|25|26	100|95|54|45	294	73.5	0	0.7	0.94
FlagBirA-PPP1R35_AAA_FIP	NP_002931.2	ABCE1	33|31|2|0|0|0|24|28|42|37|31|30	21|20|29|17	87	21.75	0	0.55	0.94
FlagBirA-PPP1R35_AAA_FIP	NP_001035810.1	G6PD	3|5|0|0|0|0|3|4|4|0|3|2	7|7|2|4	20	5	0	1.11	0.79
FlagBirA-PPP1R35_AAA_FIP	NP_064502.9	LARS	162|173|129|123|123|113|139|136|104|113|147|145	162|156|137|131	586	146.5	0	0.87	0.94
FlagBirA-PPP1R35_AAA_FIP	NP_001035828.1	TROVE2	25|17|3|5|4|6|31|24|18|14|22|25	23|23|17|14	77	19.25	0	0.69	0.93
FlagBirA-PPP1R35_AAA_FIP	NP_001035830.1	PGP	9|7|0|0|0|0|15|12|9|9|7|6	11|14|12|11	48	12	0	0.89	0.91
FlagBirA-PPP1R35_AAA_FIP	NP_001035847.1	PPP4R1	0|2|0|0|0|0|6|5|5|10|0|0	5|4|0|0	9	2.25	0	0.28	0.9
FlagBirA-PPP1R35_AAA_FIP	NP_005819.3	DCAF7	13|11|0|4|0|6|12|9|9|8|15|15	9|10|7|12	38	9.5	0	0.63	0.92
FlagBirA-PPP1R35_AAA_FIP	NP_036265.3	COPG2	29|38|30|28|31|32|52|44|33|36|42|37	51|45|35|29	160	40	0	0.83	0.94
FlagBirA-PPP1R35_AAA_FIP	NP_060140.2	OTUB1	27|30|0|0|0|0|33|29|29|31|23|25	25|22|35|29	111	27.75	0	0.87	0.93
FlagBirA-PPP1R35_AAA_FIP	NP_001596.2	AARS	37|30|0|0|0|0|45|42|34|48|10|12	33|31|15|21	100	25	0	0.54	0.94
FlagBirA-PPP1R35_AAA_FIP	NP_061878.3	MIOS	0|0|0|0|0|0|0|2|0|0|2|0	3|2|0|0	5	1.25	0	0.62	0.75
FlagBirA-PPP1R35_AAA_FIP	NP_001035879.1	PSPC1	5|6|0|0|0|0|13|12|7|8|14|11	11|14|11|11	47	11.75	0	0.87	0.91
FlagBirA-PPP1R35_AAA_FIP	NP_055627.2	CEP170	0|0|0|0|0|0|0|0|0|2|0|0	8|7|3|0	18	4.5	0.41	4.5	0.36
FlagBirA-PPP1R35_AAA_FIP	NP_059107.1	SMN2	0|5|11|14|9|9|7|2|6|7|0|0	13|12|9|10	44	11	0	0.88	0.9
FlagBirA-PPP1R35_AAA_FIP	NP_775882.2	FAM98B	0|2|0|0|0|0|8|12|11|8|0|0	12|11|2|0	25	6.25	0	0.54	0.9
FlagBirA-PPP1R35_AAA_FIP	NP_003840.2	SUCLG1	7|14|0|0|0|0|15|18|9|6|5|7	12|9|8|5	34	8.5	0	0.52	0.92
FlagBirA-PPP1R35_AAA_FIP	NP_005683.2	ABCF2	6|11|17|20|10|14|9|12|14|15|21|13	12|11|28|20	71	17.75	0	0.87	0.91
FlagBirA-PPP1R35_AAA_FIP	NP_071353.4	HEATR6	6|4|0|2|0|0|6|5|4|6|4|5	3|3|3|4	13	3.25	0	0.54	0.88
FlagBirA-PPP1R35_AAA_FIP	NP_060695.2	SMU1	19|17|0|0|3|0|27|21|26|37|26|21	42|39|43|36	160	40	0	1.25	0.93
FlagBirA-PPP1R35_AAA_FIP	NP_061828.1	UBB	12|17|0|0|0|0|11|17|24|16|9|8	10|15|15|20	60	15	0	0.73	0.92
FlagBirA-PPP1R35_AAA_FIP	NP_006435.2	SMC2	6|8|10|8|7|8|7|7|10|6|9|10	14|19|13|11	57	14.25	0	1.43	0.83
FlagBirA-PPP1R35_AAA_FIP	NP_001036005.1	NCBP2	3|0|0|0|0|0|2|2|3|3|0|0	3|4|3|0	10	2.5	0	0.83	0.78
FlagBirA-PPP1R35_AAA_FIP	NP_055955.1	TTLL12	42|39|0|0|0|0|37|33|42|44|16|27	46|51|36|25	158	39.5	0	0.92	0.93
FlagBirA-PPP1R35_AAA_FIP	NP_066952.1	PPA1	51|41|0|0|0|0|37|35|23|28|35|42	27|22|21|17	87	21.75	0	0.47	0.94
FlagBirA-PPP1R35_AAA_FIP	NP_060445.3	ZWILCH	3|0|0|0|0|0|8|12|5|2|0|2	3|0|0|0	3	0.75	0	0.07	0.92
FlagBirA-PPP1R35_AAA_FIP	NP_009055.2	UTRN	0|0|0|0|0|0|0|0|0|0|0|0	4|4|4|2	14	3.5	0.94	35	0.01
FlagBirA-PPP1R35_AAA_FIP	NP_005026.3	POLRMT	2|3|0|0|0|0|0|0|0|0|2|5	10|11|6|0	27	6.75	0.05	1.69	0.64
FlagBirA-PPP1R35_AAA_FIP	NP_001036069.1	XRN1	0|0|0|0|0|0|0|0|0|0|0|0	6|6|3|3	18	4.5	0.98	45	0
FlagBirA-PPP1R35_AAA_FIP	NP_001244.1	CDC5L	6|8|7|12|5|4|5|10|10|6|3|4	12|24|12|12	60	15	0	1.36	0.79
FlagBirA-PPP1R35_AAA_FIP	NP_891553.2	KLC1	17|24|26|24|17|18|19|17|22|17|5|2	15|20|19|16	70	17.5	0	0.7	0.93
FlagBirA-PPP1R35_AAA_FIP	NP_115683.3	C9orf64	8|3|0|0|0|0|11|14|13|13|6|5	11|11|5|4	31	7.75	0	0.57	0.91
FlagBirA-PPP1R35_AAA_FIP	NP_057460.3	ANKFY1	4|4|51|50|44|39|7|0|6|9|5|5	11|17|5|3	36	9	0	0.18	0.94
FlagBirA-PPP1R35_AAA_FIP	NP_005637.3	TARBP1	4|5|0|0|0|0|6|3|6|11|0|2	7|6|4|2	19	4.75	0	0.56	0.89
FlagBirA-PPP1R35_AAA_FIP	NP_005580.1	ALDH6A1	10|8|0|0|0|0|10|8|3|2|3|4	5|5|3|7	20	5	0	0.5	0.91
FlagBirA-PPP1R35_AAA_FIP	NP_006294.2	AIMP2	31|36|14|16|15|11|33|26|29|33|33|27	26|27|22|25	100	25	0	0.72	0.93
FlagBirA-PPP1R35_AAA_FIP	NP_066944.1	EEF1B2	32|24|8|9|11|12|28|20|21|24|22|26	16|25|27|23	91	22.75	0	0.76	0.93
FlagBirA-PPP1R35_AAA_FIP	NP_003580.1	CUL4A	9|9|0|0|0|0|17|15|10|11|11|11	7|6|4|0	17	4.25	0	0.27	0.94
FlagBirA-PPP1R35_AAA_FIP	NP_068598.1	FASTKD5	0|0|0|0|0|0|2|3|6|0|3|0	5|8|3|4	20	5	0	1.11	0.78
FlagBirA-PPP1R35_AAA_FIP	NP_036399.3	HSPBP1	3|0|0|0|0|0|4|4|0|0|4|3	3|3|0|0	6	1.5	0	0.38	0.84
FlagBirA-PPP1R35_AAA_FIP	NP_006314.2	SEC24B	4|4|0|0|0|0|6|0|5|5|2|0	3|8|2|4	17	4.25	0	0.77	0.83
FlagBirA-PPP1R35_AAA_FIP	NP_003841.1	SUCLA2	18|22|0|0|0|0|21|26|11|9|19|19	11|11|25|29	76	19	0	0.79	0.92
FlagBirA-PPP1R35_AAA_FIP	NP_000971.1	RPL18A	5|5|19|17|16|15|5|0|4|0|0|0	9|10|10|10	39	9.75	0	0.54	0.93
FlagBirA-PPP1R35_AAA_FIP	NP_068803.1	HIST1H4J	24|25|21|18|11|12|15|15|52|42|19|16	26|27|57|63	173	43.25	0	0.92	0.93
FlagBirA-PPP1R35_AAA_FIP	NP_542198.2	VPS41	0|0|0|0|0|0|0|0|0|0|0|0	3|0|0|0	3	0.75	0.24	7.5	0.48
FlagBirA-PPP1R35_AAA_FIP	NP_055841.2	MON2	12|10|5|6|2|5|13|11|6|10|7|5	6|8|0|2	16	4	0	0.32	0.92
FlagBirA-PPP1R35_AAA_FIP	NP_001041664.1	RCC1	14|13|0|0|0|0|18|16|25|26|16|19	22|20|15|20	77	19.25	0	0.75	0.93
FlagBirA-PPP1R35_AAA_FIP	NP_055642.3	ZC3H11A	2|4|0|0|0|0|7|8|7|6|6|6	9|9|3|0	21	5.25	0	0.7	0.87
FlagBirA-PPP1R35_AAA_FIP	NP_612357.4	FAM105B	0|0|9|4|0|3|3|3|4|3|2|2	5|4|0|0	9	2.25	0	0.35	0.88
FlagBirA-PPP1R35_AAA_FIP	NP_002991.2	SDHB	0|0|7|5|12|15|0|0|0|0|4|2	5|5|7|7	24	6	0	0.44	0.92
FlagBirA-PPP1R35_AAA_FIP	NP_000687.3	ALDH9A1	11|11|0|0|0|0|12|11|8|4|18|20	8|8|7|6	29	7.25	0	0.38	0.93
FlagBirA-PPP1R35_AAA_FIP	NP_037414.3	UHRF1	0|0|0|0|0|0|0|0|0|0|0|0	3|3|0|3	9	2.25	0.72	22.5	0.09
FlagBirA-PPP1R35_AAA_FIP	NP_037365.2	STK39	0|0|3|2|2|3|7|4|0|4|3|0	6|6|4|0	16	4	0	0.73	0.85
FlagBirA-PPP1R35_AAA_FIP	NP_006026.3	CDC42BPB	0|0|0|0|0|0|0|0|0|0|0|0	4|5|0|0	9	2.25	0.5	22.5	0.24
FlagBirA-PPP1R35_AAA_FIP	NP_057212.1	COPG1	29|29|8|9|11|6|34|30|41|27|28|30	32|42|27|37	138	34.5	0	0.92	0.93
FlagBirA-PPP1R35_AAA_FIP	NP_057038.2	DERA	16|16|0|0|2|0|13|15|5|9|5|5	6|5|9|7	27	6.75	0	0.42	0.92
FlagBirA-PPP1R35_AAA_FIP	NP_006624.2	IQGAP2	0|0|0|0|0|0|0|0|3|2|0|0	15|14|2|0	31	7.75	0.5	3.1	0.23
FlagBirA-PPP1R35_AAA_FIP	NP_001070674.1	SEC31A	20|19|0|0|0|0|28|32|17|23|19|14	19|15|11|11	56	14	0	0.47	0.93
FlagBirA-PPP1R35_AAA_FIP	NP_006631.2	2009-09-01	9|10|0|0|0|0|11|17|6|11|8|9	5|6|0|6	17	4.25	0	0.3	0.94
FlagBirA-PPP1R35_AAA_FIP	NP_004861.2	MPDU1	0|0|0|0|0|6|7|6|7|6|0|0	4|4|0|0	8	2	0	0.29	0.89
FlagBirA-PPP1R35_AAA_FIP	NP_064551.3	MCCC1	0|0|17|3|14|5|0|3|2|0|2|0	3|2|0|0	5	1.25	0	0.08	0.94
FlagBirA-PPP1R35_AAA_FIP	NP_002038.2	GARS	9|8|0|0|0|0|17|10|11|9|4|6	11|15|5|5	36	9	0	0.64	0.91
FlagBirA-PPP1R35_AAA_FIP	NP_060230.5	NCAPG2	6|7|8|4|0|5|6|2|8|9|9|8	7|9|6|5	27	6.75	0	0.75	0.89
FlagBirA-PPP1R35_AAA_FIP	NP_057147.2	HDDC2	12|7|0|0|0|0|11|14|8|12|8|10	13|13|11|11	48	12	0	0.92	0.91
FlagBirA-PPP1R35_AAA_FIP	NP_057042.2	DPH5	9|5|0|0|0|0|8|11|7|9|6|7	10|9|4|4	27	6.75	0	0.68	0.9
FlagBirA-PPP1R35_AAA_FIP	NP_003929.4	AP3D1	16|11|25|27|30|26|18|16|13|18|14|15	33|33|25|26	117	29.25	0	1.03	0.93
FlagBirA-PPP1R35_AAA_FIP	NP_061876.3	SPIN2A	0|0|0|2|0|0|0|3|8|8|0|0	4|6|0|0	10	2.5	0	0.31	0.89
FlagBirA-PPP1R35_AAA_FIP	NP_037466.2	GMPPB	5|7|3|2|2|5|6|6|4|3|8|6	5|7|0|0	12	3	0	0.4	0.89
FlagBirA-PPP1R35_AAA_FIP	NP_060289.2	RG9MTD1	0|0|0|0|0|0|0|0|0|0|0|0	5|9|0|0	14	3.5	0.5	35	0.2
FlagBirA-PPP1R35_AAA_FIP	NP_060941.2	ZC3H15	0|0|2|0|0|0|2|0|2|2|0|0	3|0|0|0	3	0.75	0	0.38	0.75
FlagBirA-PPP1R35_AAA_FIP	NP_057210.2	HSPB11	18|17|3|0|0|0|12|18|15|12|8|11	13|11|9|9	42	10.5	0	0.58	0.92
FlagBirA-PPP1R35_AAA_FIP	NP_001072113.1	CDC16	7|6|0|4|0|2|5|4|5|4|2|0	5|8|8|10	31	7.75	0	1.19	0.83
FlagBirA-PPP1R35_AAA_FIP	NP_006699.2	GLO1	10|9|0|2|0|0|12|12|6|5|2|3	6|4|3|5	18	4.5	0	0.38	0.92
FlagBirA-PPP1R35_AAA_FIP	NP_004652.2	CDC23	13|10|3|0|0|0|8|7|11|11|5|4	13|13|3|3	32	8	0	0.67	0.9
FlagBirA-PPP1R35_AAA_FIP	NP_001072983.1	TBCE	25|24|0|0|0|0|26|18|27|31|7|10	22|23|11|11	67	16.75	0	0.58	0.93
FlagBirA-PPP1R35_AAA_FIP	NP_056197.2	HECTD1	2|5|0|2|0|0|7|10|15|14|9|5	6|6|7|10	29	7.25	0	0.5	0.92
FlagBirA-PPP1R35_AAA_FIP	NP_056474.2	RSL1D1	0|3|20|22|24|22|8|4|12|12|0|0	17|20|14|10	61	15.25	0	0.66	0.93
FlagBirA-PPP1R35_AAA_FIP	NP_037373.2	FHOD1	5|3|0|0|0|0|7|6|5|9|6|4	3|2|3|2	10	2.5	0	0.31	0.94
FlagBirA-PPP1R35_AAA_FIP	NP_057417.3	SRRM2	0|0|16|16|5|6|0|0|0|0|0|0	2|2|0|4	8	2	0	0.12	0.93
FlagBirA-PPP1R35_AAA_FIP	NP_009200.2	STXBP3	9|7|0|0|0|0|11|10|11|11|12|14	12|11|2|6	31	7.75	0	0.6	0.91
FlagBirA-PPP1R35_AAA_FIP	NP_001073027.1	HNRNPUL2	3|0|0|0|0|0|3|3|0|0|0|0	11|13|0|0	24	6	0.44	2	0.34
FlagBirA-PPP1R35_AAA_FIP	NP_006378.3	CHERP	7|6|15|16|10|10|7|3|4|3|5|8	3|4|9|7	23	5.75	0	0.37	0.92
FlagBirA-PPP1R35_AAA_FIP	NP_005210.3	DIAPH1	18|19|0|3|3|0|29|25|15|15|14|17	20|25|13|10	68	17	0	0.63	0.93
FlagBirA-PPP1R35_AAA_FIP	NP_072045.1	RPS18	32|33|44|36|36|37|27|27|25|30|27|32	29|30|37|28	124	31	0	0.77	0.93
FlagBirA-PPP1R35_AAA_FIP	NP_061138.3	VPS33B	5|4|0|0|0|0|2|3|2|0|6|5	6|4|3|3	16	4	0	0.73	0.85
FlagBirA-PPP1R35_AAA_FIP	NP_001351.2	DHCR7	0|0|3|0|3|3|0|0|4|4|0|0	4|2|0|0	6	1.5	0	0.38	0.83
FlagBirA-PPP1R35_AAA_FIP	NP_001073335.1	BCS1L	0|0|0|0|0|0|0|0|0|0|0|0	8|5|3|0	16	4	0.74	40	0.07
FlagBirA-PPP1R35_AAA_FIP	NP_001427.2	FBL	0|0|8|8|7|10|0|0|8|6|3|0	12|12|7|8	39	9.75	0	1.08	0.87
FlagBirA-PPP1R35_AAA_FIP	NP_061819.2	NANS	14|18|0|0|0|0|28|18|15|15|15|10	20|23|13|12	68	17	0	0.74	0.92
FlagBirA-PPP1R35_AAA_FIP	NP_055318.2	UTP20	0|0|0|0|0|0|2|0|4|3|0|0	3|0|0|0	3	0.75	0	0.21	0.83
FlagBirA-PPP1R35_AAA_FIP	NP_003579.3	CUL4B	7|9|0|0|0|0|20|18|4|7|11|13	7|9|3|4	23	5.75	0	0.3	0.93
FlagBirA-PPP1R35_AAA_FIP	NP_055852.2	KIAA0913	0|0|0|0|0|0|0|0|0|0|0|0	7|0|0|0	7	1.75	0.25	17.5	0.42
FlagBirA-PPP1R35_AAA_FIP	NP_056154.1	ADNP	3|2|0|0|0|0|5|2|3|3|4|6	17|18|8|9	52	13	0.41	2.36	0.36
FlagBirA-PPP1R35_AAA_FIP	NP_001073867.1	KIAA0368	21|21|5|10|6|6|25|27|23|27|29|27	24|20|8|5	57	14.25	0	0.51	0.93
FlagBirA-PPP1R35_AAA_FIP	NP_001073884.1	U2SURP	6|4|27|27|32|34|6|11|3|4|5|4	5|8|0|5	18	4.5	0	0.14	0.94
FlagBirA-PPP1R35_AAA_FIP	NP_001073936.1	MYO5B	0|0|0|2|0|0|0|0|11|10|0|0	5|9|0|0	14	3.5	0	0.33	0.9
FlagBirA-PPP1R35_AAA_FIP	NP_056536.2	GEMIN4	7|12|5|5|3|6|11|18|15|18|5|3	26|22|7|3	58	14.5	0	0.81	0.91
FlagBirA-PPP1R35_AAA_FIP	NP_597709.2	RAVER1	0|0|0|0|0|0|0|0|0|0|0|0	9|7|0|4	20	5	0.75	50	0.06
FlagBirA-PPP1R35_AAA_FIP	NP_073733.1	KLC2	6|10|9|8|3|7|5|10|8|5|5|5	9|10|4|2	25	6.25	0	0.62	0.9
FlagBirA-PPP1R35_AAA_FIP	NP_005678.3	FARSB	35|32|0|0|0|0|37|40|35|31|26|35	33|35|32|41	141	35.25	0	0.92	0.93
FlagBirA-PPP1R35_AAA_FIP	NP_005177.2	CAPN1	11|14|6|7|5|5|14|18|9|13|15|17	15|14|9|5	43	10.75	0	0.61	0.92
FlagBirA-PPP1R35_AAA_FIP	NP_057736.4	CRNKL1	0|0|0|0|0|0|3|3|4|4|0|0	3|2|2|0	7	1.75	0	0.44	0.84
FlagBirA-PPP1R35_AAA_FIP	NP_001074248.1	MYO1C	16|16|0|3|2|0|19|16|15|17|29|23	28|26|7|7	68	17	0	0.65	0.93
FlagBirA-PPP1R35_AAA_FIP	NP_006182.2	PA2G4	48|52|5|3|5|5|56|47|57|73|35|36	50|65|50|51	216	54	0	0.83	0.94
FlagBirA-PPP1R35_AAA_FIP	NP_072179.1	RASA1	2|3|0|0|0|0|0|0|0|0|4|4	3|3|0|0	6	1.5	0	0.38	0.84
FlagBirA-PPP1R35_AAA_FIP	NP_001075019.1	THOC2	24|26|4|3|2|0|32|29|22|26|25|28	19|22|25|29	95	23.75	0	0.78	0.93
FlagBirA-PPP1R35_AAA_FIP	NP_006074.2	IK	10|10|0|0|0|0|9|7|13|13|5|6	19|17|11|9	56	14	0	1.08	0.89
FlagBirA-PPP1R35_AAA_FIP	NP_075266.1	ACSL4	11|11|6|8|8|6|15|13|9|21|14|13	14|13|12|9	48	12	0	0.67	0.92
FlagBirA-PPP1R35_AAA_FIP	NP_036443.1	KIN	0|2|0|0|0|0|0|0|2|0|0|0	6|8|3|0	17	4.25	0.22	2.12	0.53
FlagBirA-PPP1R35_AAA_FIP	NP_006035.2	HDAC6	4|0|0|0|0|0|3|0|0|0|2|0	6|0|0|0	6	1.5	0	0.43	0.77
FlagBirA-PPP1R35_AAA_FIP	NP_076983.1	NOC4L	7|7|2|0|0|0|4|3|0|0|4|4	5|8|0|3	16	4	0	0.57	0.87
FlagBirA-PPP1R35_AAA_FIP	NP_077007.1	WDR77	11|13|79|86|77|67|13|9|17|17|0|0	12|13|15|14	54	13.5	0	0.16	0.94
FlagBirA-PPP1R35_AAA_FIP	NP_055456.2	MDC1	4|4|0|0|0|0|0|2|2|3|2|2	4|6|3|2	15	3.75	0	0.94	0.79
FlagBirA-PPP1R35_AAA_FIP	NP_060587.8	WDR11	7|4|0|3|5|0|14|8|9|11|12|12	17|18|9|10	54	13.5	0	1.04	0.89
FlagBirA-PPP1R35_AAA_FIP	NP_078813.1	CARS2	3|0|0|0|0|0|2|4|2|3|7|8	4|3|0|3	10	2.5	0	0.33	0.9
FlagBirA-PPP1R35_AAA_FIP	NP_079120.1	NUP85	25|18|5|4|6|5|21|24|19|11|18|21	14|27|12|16	69	17.25	0	0.7	0.92
FlagBirA-PPP1R35_AAA_FIP	NP_079160.1	L2HGDH	3|2|3|3|4|2|2|3|2|3|2|3	11|10|3|5	29	7.25	0.17	2.07	0.6
FlagBirA-PPP1R35_AAA_FIP	NP_079422.1	NAA50	12|11|0|0|0|0|8|8|12|11|13|17	8|11|5|0	24	6	0	0.4	0.92
FlagBirA-PPP1R35_AAA_FIP	NP_079510.1	WDR61	18|19|7|9|3|5|15|20|15|17|18|17	21|21|20|20	82	20.5	0	1.05	0.92
FlagBirA-PPP1R35_AAA_FIP	NP_079517.1	UBXN6	0|0|0|0|0|0|0|0|0|0|0|2	5|8|5|4	22	5.5	0.45	5.5	0.32
FlagBirA-PPP1R35_AAA_FIP	NP_079543.1	13376886	2|4|0|0|0|0|4|4|7|3|4|3	7|4|3|2	16	4	0	0.73	0.84
FlagBirA-PPP1R35_AAA_FIP	NP_002731.4	PRKCI	3|2|3|0|0|0|4|4|0|0|0|0	7|6|9|10	32	8	0.02	2	0.68
FlagBirA-PPP1R35_AAA_FIP	NP_004676.3	MTMR6	6|4|0|2|0|0|3|0|6|4|0|0	9|7|5|5	26	6.5	0	1.08	0.83
FlagBirA-PPP1R35_AAA_FIP	NP_003791.3	RNGTT	2|0|0|0|0|0|0|0|2|4|0|0	9|8|3|4	24	6	0.09	2	0.62
FlagBirA-PPP1R35_AAA_FIP	NP_001077083.1	EARS2	0|0|0|0|0|0|0|5|2|0|0|4	4|2|8|3	17	4.25	0	0.94	0.78
FlagBirA-PPP1R35_AAA_FIP	NP_006109.2	HAX1	2|0|3|0|0|0|3|5|2|2|8|4	7|10|3|2	22	5.5	0	0.85	0.83
FlagBirA-PPP1R35_AAA_FIP	NP_110395.1	ILKAP	6|5|0|0|0|0|9|7|5|7|10|6	5|10|4|6	25	6.25	0	0.66	0.89
FlagBirA-PPP1R35_AAA_FIP	NP_112485.1	FAHD1	3|0|0|0|0|0|0|6|0|0|0|0	5|0|0|0	5	1.25	0	0.28	0.84
FlagBirA-PPP1R35_AAA_FIP	NP_112487.1	SLIRP	7|8|0|2|4|0|4|6|5|5|4|6	3|9|3|6	21	5.25	0	0.7	0.87
FlagBirA-PPP1R35_AAA_FIP	NP_004514.2	KIF11	142|144|235|230|197|201|70|77|125|129|23|24	102|94|124|110	430	107.5	0	0.46	0.94
FlagBirA-PPP1R35_AAA_FIP	NP_113626.1	NUDT12	7|5|0|0|0|0|10|18|7|8|6|0	4|4|2|0	10	2.5	0	0.18	0.94
FlagBirA-PPP1R35_AAA_FIP	NP_001000.2	RPS5	20|23|17|19|10|12|27|15|21|20|14|15	22|17|22|26	87	21.75	0	0.87	0.93
FlagBirA-PPP1R35_AAA_FIP	NP_114107.1	MRPS21	3|2|0|0|0|0|0|0|0|0|0|0	4|4|3|8	19	4.75	0.09	1.9	0.62
FlagBirA-PPP1R35_AAA_FIP	NP_114108.1	MRPS5	0|0|0|0|0|0|3|0|0|0|0|0	9|11|8|6	34	8.5	0.54	5.67	0.14
FlagBirA-PPP1R35_AAA_FIP	NP_112740.1	HNRPDL	25|21|13|10|10|10|27|31|33|24|18|14	36|44|33|31	144	36	0	1.12	0.93
FlagBirA-PPP1R35_AAA_FIP	NP_002129.2	HNRNPD	33|31|23|24|20|19|29|26|37|39|15|15	47|39|38|43	167	41.75	0	1.1	0.93
FlagBirA-PPP1R35_AAA_FIP	NP_036339.1	HNRNPH3	0|0|0|0|0|0|5|0|6|7|0|0	9|7|0|0	16	4	0	0.62	0.85
FlagBirA-PPP1R35_AAA_FIP	NP_004492.2	HNRNPU	37|30|56|50|62|56|27|28|35|34|20|24	65|60|57|53	235	58.75	0	1	0.94
FlagBirA-PPP1R35_AAA_FIP	NP_001004.2	RPS9	17|16|52|43|48|48|15|16|14|18|13|11	30|26|32|25	113	28.25	0	0.56	0.94
FlagBirA-PPP1R35_AAA_FIP	NP_056107.1	ESYT1	7|0|15|12|6|3|2|3|6|0|3|2	3|8|4|5	20	5	0	0.37	0.92
FlagBirA-PPP1R35_AAA_FIP	NP_065174.1	CORO1B	4|6|0|0|0|0|7|6|3|4|0|2	3|2|4|5	14	3.5	0	0.54	0.88
FlagBirA-PPP1R35_AAA_FIP	NP_115500.1	HDHD2	3|0|0|0|0|0|6|6|3|0|7|4	2|3|0|0	5	1.25	0	0.19	0.89
FlagBirA-PPP1R35_AAA_FIP	NP_115607.1	FAM96A	0|0|0|0|0|0|3|2|0|0|4|3	2|2|0|0	4	1	0	0.29	0.84
FlagBirA-PPP1R35_AAA_FIP	NP_115700.1	NTPCR	20|16|9|12|11|8|18|22|20|19|23|24	26|17|14|16	73	18.25	0	0.78	0.92
FlagBirA-PPP1R35_AAA_FIP	NP_115737.1	THOC3	6|6|11|8|6|7|6|5|6|6|7|6	5|9|8|7	29	7.25	0	0.76	0.9
FlagBirA-PPP1R35_AAA_FIP	NP_114402.1	NDRG3	6|8|6|4|2|0|11|19|9|5|10|9	5|3|5|6	19	4.75	0	0.32	0.94
FlagBirA-PPP1R35_AAA_FIP	NP_112552.1	HNRNPK	197|167|142|137|113|109|161|145|136|138|170|185	204|205|179|191	779	194.75	0	1.02	0.94
FlagBirA-PPP1R35_AAA_FIP	NP_114367.1	PTBP1	0|0|23|18|30|20|11|9|0|4|5|2	3|7|0|0	10	2.5	0	0.09	0.94
FlagBirA-PPP1R35_AAA_FIP	NP_001010.2	RPS15A	15|17|26|28|40|32|29|30|33|35|17|19	32|36|9|11	88	22	0	0.59	0.93
FlagBirA-PPP1R35_AAA_FIP	NP_066014.1	MOV10	0|0|4|3|3|4|0|0|0|0|0|0	4|5|0|0	9	2.25	0	0.56	0.81
FlagBirA-PPP1R35_AAA_FIP	NP_115963.1	DPY30	8|3|0|0|0|0|8|11|6|0|0|0	13|12|2|0	27	6.75	0	0.71	0.88
FlagBirA-PPP1R35_AAA_FIP	NP_116120.1	TXNDC17	7|12|7|6|6|5|13|11|11|9|17|12	11|10|7|7	35	8.75	0	0.58	0.92
FlagBirA-PPP1R35_AAA_FIP	NP_116136.1	USMG5	0|0|0|0|7|6|0|4|5|0|0|0	3|4|4|4	15	3.75	0	0.58	0.89
FlagBirA-PPP1R35_AAA_FIP	NP_001279.2	CLIC1	24|18|0|0|0|0|28|25|19|25|23|14	24|13|9|7	53	13.25	0	0.5	0.93
FlagBirA-PPP1R35_AAA_FIP	NP_110438.1	MRPS26	0|0|0|0|0|0|0|0|0|0|0|0	14|0|6|4	24	6	0.75	60	0.06
FlagBirA-PPP1R35_AAA_FIP	NP_001007.2	RPS12	47|41|17|15|23|23|46|50|36|33|10|13	41|36|20|21	118	29.5	0	0.61	0.94
FlagBirA-PPP1R35_AAA_FIP	AAH09271.1	UBE3A	9|7|0|0|0|0|6|5|5|4|8|0	8|10|5|0	23	5.75	0	0.68	0.88
FlagBirA-PPP1R35_AAA_FIP	NP_775901.3	RTTN	0|0|0|0|0|0|0|0|0|0|0|0	6|10|6|6	28	7	1	70	0
FlagBirA-PPP1R35_AAA_FIP	NP_067653.3	C12orf10	6|6|0|0|0|0|3|4|6|7|0|0	5|5|0|0	10	2.5	0	0.38	0.88
FlagBirA-PPP1R35_AAA_FIP	NP_060597.4	ELAC2	23|17|13|12|8|8|31|32|33|24|27|29	24|19|24|22	89	22.25	0	0.68	0.93
FlagBirA-PPP1R35_AAA_FIP	NP_073713.2	CTBP2	24|24|0|0|0|0|21|21|24|24|17|20	23|28|22|29	102	25.5	0	1.06	0.92
FlagBirA-PPP1R35_AAA_FIP	NP_001077430.1	WDR62	0|0|0|0|0|0|0|0|2|0|0|0	5|4|2|0	11	2.75	0.16	2.75	0.6
FlagBirA-PPP1R35_AAA_FIP	NP_075384.3	KRI1	0|0|0|0|0|0|0|0|0|0|0|0	4|0|0|0	4	1	0.25	10	0.45
FlagBirA-PPP1R35_AAA_FIP	NP_653259.3	DOCK11	6|3|8|2|7|4|0|3|2|3|4|0	11|4|0|0	15	3.75	0	0.5	0.85
FlagBirA-PPP1R35_AAA_FIP	NP_002686.2	POLR2E	6|3|7|6|5|6|8|7|5|6|7|6	10|6|5|3	24	6	0	0.8	0.86
FlagBirA-PPP1R35_AAA_FIP	NP_006223.2	POLR2H	4|5|0|4|0|0|3|2|3|6|0|0	4|3|3|3	13	3.25	0	0.59	0.87
FlagBirA-PPP1R35_AAA_FIP	NP_000960.2	RPL5	0|3|0|0|0|0|5|3|0|3|6|6	10|15|7|5	37	9.25	0.01	1.54	0.69
FlagBirA-PPP1R35_AAA_FIP	NP_116780.1	SEC23B	12|14|0|5|0|0|20|22|22|16|12|0	22|20|16|13	71	17.75	0	0.81	0.92
FlagBirA-PPP1R35_AAA_FIP	NP_116558.1	POLR2C	7|4|0|0|0|0|6|0|9|9|6|4	8|5|6|7	26	6.5	0	0.72	0.9
FlagBirA-PPP1R35_AAA_FIP	NP_055984.1	RRS1	0|0|0|0|0|0|0|0|6|4|0|0	3|6|0|0	9	2.25	0	0.45	0.84
FlagBirA-PPP1R35_AAA_FIP	NP_079498.2	WDR82	8|7|0|0|0|0|13|4|9|8|10|8	9|9|11|8	37	9.25	0	0.8	0.9
FlagBirA-PPP1R35_AAA_FIP	NP_783859.1	PTPMT1	0|0|0|0|0|0|0|0|0|0|0|0	7|4|0|0	11	2.75	0.5	27.5	0.23
FlagBirA-PPP1R35_AAA_FIP	NP_001091742.1	HMGCS1	2|0|0|0|0|0|3|6|4|6|0|0	4|3|2|0	9	2.25	0	0.38	0.88
FlagBirA-PPP1R35_AAA_FIP	NP_001091678.1	HNRNPF	50|60|35|44|37|39|72|69|61|76|51|60	88|98|68|76	330	82.5	0	1.11	0.94
FlagBirA-PPP1R35_AAA_FIP	NP_001896.2	CTPS	65|69|28|35|46|39|69|71|76|64|61|65	69|63|53|55	240	60	0	0.82	0.94
FlagBirA-PPP1R35_AAA_FIP	NP_940863.3	LONRF2	0|0|0|0|0|0|0|0|0|0|0|0	2|0|0|0	2	0.5	0.2	5	0.53
FlagBirA-PPP1R35_AAA_FIP	NP_001914.3	DDB1	11|10|36|33|21|26|15|13|20|19|9|8	24|24|11|13	72	18	0	0.52	0.93
FlagBirA-PPP1R35_AAA_FIP	NP_115558.3	FAM175B	0|3|0|0|0|0|3|3|2|0|0|0	2|2|0|3	7	1.75	0	0.58	0.8
FlagBirA-PPP1R35_AAA_FIP	NP_005882.2	ACAT2	56|54|6|12|8|7|48|53|42|49|50|49	23|35|46|49	153	38.25	0	0.7	0.94
FlagBirA-PPP1R35_AAA_FIP	NP_115709.3	FAM213A	4|4|0|0|0|0|6|8|0|0|0|0	2|0|0|0	2	0.5	0	0.07	0.9
FlagBirA-PPP1R35_AAA_FIP	NP_001091981.1	KIF2A	6|5|7|6|0|0|3|8|0|0|0|0	11|12|11|4	38	9.5	0	1.27	0.84
FlagBirA-PPP1R35_AAA_FIP	NP_060828.2	ABCF3	4|0|0|0|0|0|3|5|6|5|2|0	7|5|3|6	21	5.25	0	0.95	0.84
FlagBirA-PPP1R35_AAA_FIP	NP_149061.1	CECR5	26|33|0|0|0|2|26|29|12|16|25|23	21|28|17|18	84	21	0	0.68	0.93
FlagBirA-PPP1R35_AAA_FIP	NP_001005242.2	PKP2	0|0|0|0|0|0|0|0|2|3|0|0	3|6|0|0	9	2.25	0.01	0.9	0.7
FlagBirA-PPP1R35_AAA_FIP	NP_001091995.1	CKAP2	0|0|0|0|0|0|3|0|0|3|0|0	4|4|3|2	13	3.25	0	1.08	0.77
FlagBirA-PPP1R35_AAA_FIP	NP_006812.3	ACOT2	17|13|0|0|2|0|21|19|11|11|22|21	11|16|8|11	46	11.5	0	0.53	0.93
FlagBirA-PPP1R35_AAA_FIP	NP_001092047.1	RPL31	4|5|11|11|10|12|4|7|6|5|0|0	7|7|10|12	36	9	0	0.78	0.9
FlagBirA-PPP1R35_AAA_FIP	NP_056110.2	SMCHD1	25|26|0|3|4|0|21|22|12|14|14|14	28|31|20|21	100	25	0	0.98	0.92
FlagBirA-PPP1R35_AAA_FIP	NP_148982.1	RPS24	9|11|22|24|13|18|9|10|11|5|3|3	22|20|18|23	83	20.75	0	0.9	0.92
FlagBirA-PPP1R35_AAA_FIP	NP_004059.2	AP2M1	4|6|6|4|4|4|0|5|7|10|4|5	15|14|17|12	58	14.5	0	1.71	0.8
FlagBirA-PPP1R35_AAA_FIP	NP_001091947.1	GRSF1	11|12|0|0|0|3|14|20|16|14|10|11	19|19|17|15	70	17.5	0	0.97	0.92
FlagBirA-PPP1R35_AAA_FIP	NP_006293.2	MOGS	16|15|13|11|10|10|15|20|9|7|15|17	25|20|22|30	97	24.25	0	1.31	0.9
FlagBirA-PPP1R35_AAA_FIP	NP_003125.3	SRP14	0|0|8|7|5|0|0|3|7|7|0|0	4|7|0|0	11	2.75	0	0.37	0.89
FlagBirA-PPP1R35_AAA_FIP	NP_004697.2	ARHGEF1	5|3|0|0|0|0|6|2|2|2|9|8	3|2|0|0	5	1.25	0	0.15	0.94
FlagBirA-PPP1R35_AAA_FIP	NP_004714.2	ARHGEF2	9|5|4|6|2|0|14|14|8|12|3|6	29|43|16|10	98	24.5	0.25	1.75	0.45
FlagBirA-PPP1R35_AAA_FIP	NP_003461.2	USP7	5|4|0|0|0|0|6|7|5|10|2|0	12|18|7|6	43	10.75	0	1.26	0.78
FlagBirA-PPP1R35_AAA_FIP	NP_004482.4	ARHGAP35	0|0|0|0|0|0|0|0|0|0|0|0	3|0|0|0	3	0.75	0.24	7.5	0.48
FlagBirA-PPP1R35_AAA_FIP	NP_075567.2	UBE2Z	4|6|0|0|0|0|5|7|2|2|5|3	4|5|2|2	13	3.25	0	0.5	0.88
FlagBirA-PPP1R35_AAA_FIP	NP_001092906.1	ULK3	6|0|0|0|0|0|4|0|3|0|9|8	8|8|6|5	27	6.75	0	0.79	0.89
FlagBirA-PPP1R35_AAA_FIP	NP_002943.2	RPS2	46|42|70|74|52|52|31|36|34|34|24|18	64|45|41|37	187	46.75	0	0.65	0.94
FlagBirA-PPP1R35_AAA_FIP	NP_110382.3	TMX1	3|0|6|0|0|0|4|7|7|7|7|4	8|7|7|6	28	7	0	1	0.87
FlagBirA-PPP1R35_AAA_FIP	NP_056986.2	UBR5	9|5|0|0|2|0|6|8|7|13|6|7	13|19|10|6	48	12	0	1.09	0.86
FlagBirA-PPP1R35_AAA_FIP	NP_002878.2	RARS	81|90|63|64|56|56|93|98|88|97|104|95	73|74|61|49	257	64.25	0	0.64	0.94
FlagBirA-PPP1R35_AAA_FIP	NP_003132.2	TRIM21	52|41|113|114|114|106|89|76|71|81|26|24	66|60|45|56	227	56.75	0	0.5	0.94
FlagBirA-PPP1R35_AAA_FIP	NP_001093120.1	GXYLT1	7|8|0|0|0|0|8|8|6|3|0|0	7|5|5|0	17	4.25	0	0.53	0.89
FlagBirA-PPP1R35_AAA_FIP	NP_003983.2	CLK3	0|0|0|0|0|0|0|0|0|0|0|0	2|0|0|0	2	0.5	0.2	5	0.53
FlagBirA-PPP1R35_AAA_FIP	NP_057336.3	BIRC6	3|2|0|0|0|0|3|0|7|12|6|4	4|2|0|2	8	2	0	0.21	0.91
FlagBirA-PPP1R35_AAA_FIP	NP_055892.2	SARM1	6|9|0|0|0|0|7|7|2|5|0|2	12|16|2|0	30	7.5	0	0.94	0.8
FlagBirA-PPP1R35_AAA_FIP	NP_009035.3	RPL10A	17|14|34|39|34|37|20|17|26|24|16|12	33|36|21|30	120	30	0	0.79	0.93
FlagBirA-PPP1R35_AAA_FIP	NP_000966.2	RPL11	8|8|11|11|12|12|10|15|14|11|10|9	13|9|11|15	48	12	0	0.83	0.91
FlagBirA-PPP1R35_AAA_FIP	NP_000962.2	RPL7	20|23|56|57|48|52|21|19|22|23|13|9	37|39|42|42	160	40	0	0.71	0.94
FlagBirA-PPP1R35_AAA_FIP	NP_000652.2	RPL9	41|34|27|30|42|41|21|26|29|28|15|18	53|39|13|16	121	30.25	0	0.73	0.93
FlagBirA-PPP1R35_AAA_FIP	NP_150644.1	RPL8	4|6|6|15|13|18|6|4|4|5|0|4	5|7|8|8	28	7	0	0.42	0.93
FlagBirA-PPP1R35_AAA_FIP	NP_055839.3	XPO7	9|9|0|0|0|0|31|26|7|10|12|12	9|12|0|0	21	5.25	0	0.18	0.93
FlagBirA-PPP1R35_AAA_FIP	NP_060634.2	ASUN	3|5|0|0|0|0|4|5|3|4|5|3	4|5|0|0	9	2.25	0	0.45	0.85
FlagBirA-PPP1R35_AAA_FIP	NP_219483.1	ARMC6	9|5|5|5|2|0|11|8|11|10|9|7	3|6|5|4	18	4.5	0	0.41	0.94
FlagBirA-PPP1R35_AAA_FIP	NP_057376.2	TRAP1	4|5|0|0|0|0|10|11|6|2|4|0	6|10|3|4	23	5.75	0	0.55	0.9
FlagBirA-PPP1R35_AAA_FIP	NP_036336.2	GTF3C4	10|7|11|10|12|13|9|7|9|19|11|10	15|17|18|15	65	16.25	0	1.02	0.91
FlagBirA-PPP1R35_AAA_FIP	NP_004159.2	SDHA	8|7|13|11|16|16|5|2|13|9|5|7	8|10|9|0	27	6.75	0	0.42	0.92
FlagBirA-PPP1R35_AAA_FIP	NP_001609.2	PARP1	55|47|0|0|4|0|49|52|80|75|33|39	87|90|51|47	275	68.75	0	0.89	0.94
FlagBirA-PPP1R35_AAA_FIP	NP_079353.3	TOE1	0|0|0|0|0|0|5|0|3|0|0|0	4|2|0|0	6	1.5	0	0.38	0.83
FlagBirA-PPP1R35_AAA_FIP	NP_006169.2	NSF	41|37|30|27|28|25|38|38|39|34|35|46	39|31|33|36	139	34.75	0	0.8	0.94
FlagBirA-PPP1R35_AAA_FIP	NP_002682.2	POLD1	20|25|3|11|8|11|17|17|10|8|25|22	36|34|20|17	107	26.75	0	1.07	0.92
FlagBirA-PPP1R35_AAA_FIP	NP_003095.2	SORD	15|24|0|0|0|0|18|21|15|17|25|24	14|11|16|17	58	14.5	0	0.59	0.93
FlagBirA-PPP1R35_AAA_FIP	NP_001096123.1	OTUD4	0|0|60|58|46|55|0|0|17|18|0|0	17|13|5|5	40	10	0	0.17	0.94
FlagBirA-PPP1R35_AAA_FIP	NP_002803.2	PSMD8	14|14|16|17|10|17|8|10|3|5|19|18	3|3|10|7	23	5.75	0	0.31	0.94
FlagBirA-PPP1R35_AAA_FIP	NP_001098016.1	RPP30	0|0|0|0|0|0|6|5|9|5|7|7	11|7|0|2	20	5	0	0.62	0.87
FlagBirA-PPP1R35_AAA_FIP	NP_060272.3	HEATR2	17|15|0|4|0|0|18|25|10|8|6|8	12|10|0|0	22	5.5	0	0.26	0.93
FlagBirA-PPP1R35_AAA_FIP	NP_001739.2	CAPN2	17|17|0|0|0|0|26|21|17|22|19|21	23|22|12|14	71	17.75	0	0.74	0.93
FlagBirA-PPP1R35_AAA_FIP	NP_055548.3	ZFYVE16	0|0|0|0|0|0|6|3|5|7|0|0	3|6|3|0	12	3	0	0.46	0.88
FlagBirA-PPP1R35_AAA_FIP	NP_005763.3	RCL1	0|0|6|5|4|6|0|2|3|4|0|0	5|5|2|4	16	4	0	0.67	0.87
FlagBirA-PPP1R35_AAA_FIP	NP_060391.2	NPLOC4	13|15|0|0|0|0|17|12|19|19|8|2	15|15|18|10	58	14.5	0	0.76	0.92
FlagBirA-PPP1R35_AAA_FIP	NP_660208.2	SPATA5	0|0|0|0|0|0|0|0|2|2|0|0	5|4|0|0	9	2.25	0.02	1.12	0.68
FlagBirA-PPP1R35_AAA_FIP	NP_002636.2	PIK3C2A	4|2|0|0|0|0|0|0|0|2|0|0	2|4|2|0	8	2	0	0.67	0.78
FlagBirA-PPP1R35_AAA_FIP	NP_055335.2	MYBBP1A	25|32|42|38|38|27|27|23|26|27|20|13	86|72|44|39	241	60.25	0	1.51	0.9
FlagBirA-PPP1R35_AAA_FIP	NP_056473.2	NOC2L	10|13|0|0|2|0|12|10|11|7|14|17	20|25|10|11	66	16.5	0	1.06	0.89
FlagBirA-PPP1R35_AAA_FIP	NP_078878.3	HECTD3	0|0|0|0|0|0|0|0|5|6|0|0	6|8|0|2	16	4	0	0.73	0.83
FlagBirA-PPP1R35_AAA_FIP	NP_056280.2	GEMIN5	15|19|16|15|6|5|17|16|20|21|10|14	16|20|17|11	64	16	0	0.78	0.92
FlagBirA-PPP1R35_AAA_FIP	NP_056513.2	GPKOW	0|0|0|0|0|0|3|2|4|4|0|2	5|6|4|3	18	4.5	0	1.12	0.79
FlagBirA-PPP1R35_AAA_FIP	NP_073572.2	ACBD3	13|9|0|0|0|0|22|21|23|21|12|8	13|18|13|11	55	13.75	0	0.61	0.93
FlagBirA-PPP1R35_AAA_FIP	NP_000986.2	RPL34	2|2|10|9|11|10|2|3|2|3|0|0	3|3|5|4	15	3.75	0	0.36	0.91
FlagBirA-PPP1R35_AAA_FIP	NP_000987.2	RPL35A	3|3|0|0|0|0|4|0|4|0|0|0	3|4|4|3	14	3.5	0	0.88	0.82
FlagBirA-PPP1R35_AAA_FIP	NP_056229.2	RPL36	5|8|10|8|15|17|4|5|5|4|4|4	7|10|6|8	31	7.75	0	0.48	0.92
FlagBirA-PPP1R35_AAA_FIP	NP_418404.1	birA	5883|6174|8310|8687|8427|8836|5721|5640|4152|4093|5921|6641	2524|2107|4841|5250	14722	3680.5	0	0.42	0.94
FlagBirA-PPP1R35_AAA_FIP	NP_443107.1	VPS26B	2|4|0|0|0|0|8|0|0|0|0|0	4|0|0|0	4	1	0	0.17	0.88
FlagBirA-PPP1R35_AAA_FIP	NP_443108.1	NACC1	0|0|3|0|3|0|0|0|0|3|0|3	5|5|10|3	23	5.75	0.14	1.92	0.61
FlagBirA-PPP1R35_AAA_FIP	NP_001104792.1	DDX54	3|4|0|0|0|0|0|0|0|3|0|0	15|15|12|8	50	12.5	0.69	3.57	0.1
FlagBirA-PPP1R35_AAA_FIP	NP_004388.2	DDX6	11|15|0|0|0|0|31|23|20|20|15|11	15|14|8|9	46	11.5	0	0.43	0.93
FlagBirA-PPP1R35_AAA_FIP	NP_003249.3	TK1	9|0|0|0|0|0|11|11|12|13|0|0	10|9|0|0	19	4.75	0	0.38	0.91
FlagBirA-PPP1R35_AAA_FIP	NP_057154.2	MRPS23	0|0|0|0|0|0|0|2|2|0|0|0	3|6|4|5	18	4.5	0.06	2.25	0.63
FlagBirA-PPP1R35_AAA_FIP	NP_060611.2	MRPS10	0|0|0|0|0|0|0|0|0|0|0|0	3|4|0|2	9	2.25	0.68	22.5	0.11
FlagBirA-PPP1R35_AAA_FIP	NP_000959.2	RPL4	26|29|76|75|82|78|27|22|24|25|18|19	55|51|61|64	231	57.75	0	0.72	0.94
FlagBirA-PPP1R35_AAA_FIP	NP_001107018.1	LIMA1	4|3|0|0|0|0|4|5|7|11|2|3	5|8|0|2	15	3.75	0	0.42	0.9
FlagBirA-PPP1R35_AAA_FIP	NP_056268.2	THUMPD3	4|5|0|0|0|0|8|7|11|10|3|5	9|9|0|4	22	5.5	0	0.52	0.9
FlagBirA-PPP1R35_AAA_FIP	NP_036515.4	OSTF1	15|0|0|0|0|0|10|12|0|0|0|0	11|8|12|19	50	12.5	0	0.93	0.9
FlagBirA-PPP1R35_AAA_FIP	NP_055246.2	KIAA1274	2|3|0|0|0|0|5|4|0|0|4|0	9|8|0|0	17	4.25	0	0.94	0.75
FlagBirA-PPP1R35_AAA_FIP	NP_057225.2	DYNC1LI1	17|15|15|17|10|13|6|15|8|10|8|8	6|7|11|8	32	8	0	0.47	0.94
FlagBirA-PPP1R35_AAA_FIP	NP_005110.2	THRAP3	2|5|2|0|10|7|4|3|12|16|0|0	26|15|3|6	50	12.5	0	0.89	0.87
FlagBirA-PPP1R35_AAA_FIP	NP_001247.3	CDC27	8|10|0|0|0|0|7|8|9|13|6|8	5|4|4|3	16	4	0	0.35	0.94
FlagBirA-PPP1R35_AAA_FIP	NP_000961.2	RPL6	30|35|100|90|82|92|28|26|31|30|16|15	56|47|68|62	233	58.25	0	0.61	0.94
FlagBirA-PPP1R35_AAA_FIP	NP_006102.2	ACAA2	38|49|42|37|36|42|58|50|40|49|38|40	45|53|26|43	167	41.75	0	0.77	0.94
FlagBirA-PPP1R35_AAA_FIP	NP_065916.2	DHX36	3|5|2|0|0|0|3|2|4|0|2|3	7|9|8|10	34	8.5	0	1.89	0.73
FlagBirA-PPP1R35_AAA_FIP	NP_387506.1	DAP3	4|4|5|4|7|7|7|10|6|8|0|0	21|16|8|4	49	12.25	0	1.36	0.74
FlagBirA-PPP1R35_AAA_FIP	NP_444505.1	RPLP0	12|10|68|60|47|54|11|17|20|18|11|9	25|28|17|16	86	21.5	0	0.34	0.94
FlagBirA-PPP1R35_AAA_FIP	NP_446464.1	ASS1	46|50|0|0|0|0|58|58|7|9|11|10	43|45|3|0	91	22.75	0	0.39	0.94
FlagBirA-PPP1R35_AAA_FIP	NP_004163.3	SLC1A3	0|3|5|0|5|0|4|4|0|5|0|4	7|5|5|3	20	5	0	1	0.82
FlagBirA-PPP1R35_AAA_FIP	NP_002628.2	PHKA1	4|2|0|0|0|0|5|3|6|12|0|3	5|4|2|0	11	2.75	0	0.31	0.9
FlagBirA-PPP1R35_AAA_FIP	NP_001116236.1	PPOX	6|5|0|0|0|0|8|8|0|0|9|9	8|8|7|0	23	5.75	0	0.64	0.89
FlagBirA-PPP1R35_AAA_FIP	NP_071757.4	MMS19	21|20|13|15|19|15|23|22|15|15|25|35	27|28|18|19	92	23	0	0.77	0.93
FlagBirA-PPP1R35_AAA_FIP	NP_036219.2	GTF3C5	7|5|4|3|2|2|6|5|10|10|6|5	17|16|12|14	59	14.75	0	1.48	0.86
FlagBirA-PPP1R35_AAA_FIP	NP_056054.2	AGTPBP1	0|0|0|0|0|0|0|0|0|0|0|0	4|3|0|0	7	1.75	0.49	17.5	0.28
FlagBirA-PPP1R35_AAA_FIP	NP_000975.2	RPL23A	0|0|33|27|15|16|0|0|4|0|0|0	7|7|11|11	36	9	0	0.3	0.94
FlagBirA-PPP1R35_AAA_FIP	NP_476516.1	NAA15	12|18|0|0|0|0|6|8|15|15|12|9	13|14|20|17	64	16	0	0.97	0.91
FlagBirA-PPP1R35_AAA_FIP	NP_478070.1	FAM207A	0|0|0|0|0|0|0|0|0|0|0|0	2|2|0|0	4	1	0.39	10	0.36
FlagBirA-PPP1R35_AAA_FIP	NP_001001.2	RPS6	8|5|23|19|13|14|11|11|16|12|8|8	9|18|19|21	67	16.75	0	0.8	0.92
FlagBirA-PPP1R35_AAA_FIP	NP_001116428.1	DBNL	0|0|0|0|0|0|0|2|0|4|0|0	4|4|0|0	8	2	0	0.67	0.77
FlagBirA-PPP1R35_AAA_FIP	NP_064583.2	CCDC47	9|8|11|5|8|5|19|18|13|16|7|4	15|14|9|11	49	12.25	0	0.66	0.92
FlagBirA-PPP1R35_AAA_FIP	NP_001231.2	CCNT1	0|0|0|0|0|0|2|0|0|0|0|0	2|0|0|0	2	0.5	0.01	0.5	0.7
FlagBirA-PPP1R35_AAA_FIP	NP_072097.2	VPS16	0|0|0|0|0|0|0|0|4|2|2|5	2|0|4|5	11	2.75	0	0.61	0.83
FlagBirA-PPP1R35_AAA_FIP	NP_065908.1	VPS18	0|3|0|0|0|0|3|0|0|4|3|5	7|8|5|3	23	5.75	0	1.28	0.78
FlagBirA-PPP1R35_AAA_FIP	NP_054722.2	DHX38	0|0|0|0|0|0|0|0|0|3|0|0	2|0|0|0	2	0.5	0	0.33	0.73
FlagBirA-PPP1R35_AAA_FIP	NP_060676.2	VPS35	55|56|34|35|38|42|75|71|70|65|59|61	75|56|38|30	199	49.75	0	0.68	0.94
FlagBirA-PPP1R35_AAA_FIP	NP_056326.2	C20orf4	6|6|12|15|9|10|16|15|14|16|0|6	14|16|11|10	51	12.75	0	0.8	0.92
FlagBirA-PPP1R35_AAA_FIP	NP_065892.1	OSBPL8	0|0|0|0|0|0|0|0|6|5|0|0	5|3|0|0	8	2	0	0.36	0.87
FlagBirA-PPP1R35_AAA_FIP	NP_542382.1	MED30	0|0|0|0|0|0|0|0|0|0|0|0	2|2|0|0	4	1	0.39	10	0.36
FlagBirA-PPP1R35_AAA_FIP	NP_000973.2	RPL21	0|3|21|24|25|28|4|5|3|3|0|2	8|13|11|5	37	9.25	0	0.35	0.93
FlagBirA-PPP1R35_AAA_FIP	NP_005774.2	TXNDC9	5|7|0|3|0|0|4|2|4|7|6|7	2|0|5|7	14	3.5	0	0.5	0.88
FlagBirA-PPP1R35_AAA_FIP	NP_542165.1	DDX39B	90|84|58|69|65|61|82|100|82|73|94|94	72|65|55|55	247	61.75	0	0.64	0.94
FlagBirA-PPP1R35_AAA_FIP	NP_542414.1	PTPN13	0|0|0|0|0|0|0|0|2|0|0|0	6|5|0|0	11	2.75	0.23	2.75	0.52
FlagBirA-PPP1R35_AAA_FIP	NP_002902.2	UPF1	2|0|3|0|2|0|3|3|4|3|0|0	5|8|15|6	34	8.5	0.25	2.43	0.42
FlagBirA-PPP1R35_AAA_FIP	NP_542161.1	RNPS1	0|0|0|0|0|0|0|0|0|0|0|0	3|2|0|0	5	1.25	0.44	12.5	0.34
FlagBirA-PPP1R35_AAA_FIP	NP_079272.4	GFM1	20|20|12|8|5|9|18|16|15|14|22|24	19|28|16|14	77	19.25	0	0.84	0.92
FlagBirA-PPP1R35_AAA_FIP	NP_064520.2	WRNIP1	3|4|0|0|0|0|0|4|3|0|2|0	12|11|0|0	23	5.75	0.14	1.44	0.61
FlagBirA-PPP1R35_AAA_FIP	NP_057267.2	MRTO4	8|10|14|13|7|3|10|7|12|12|3|8	12|11|7|6	36	9	0	0.67	0.91
FlagBirA-PPP1R35_AAA_FIP	NP_079183.4	FBXO17	0|0|0|0|0|0|5|3|0|0|0|0	5|2|0|0	7	1.75	0	0.44	0.82
FlagBirA-PPP1R35_AAA_FIP	NP_075068.2	NOL6	0|2|0|0|0|0|0|0|0|7|8|5	4|2|3|0	9	2.25	0	0.3	0.9
FlagBirA-PPP1R35_AAA_FIP	NP_110517.2	CTNNBL1	13|20|0|0|0|0|20|17|17|22|12|13	25|21|20|23	89	22.25	0	1.06	0.92
FlagBirA-PPP1R35_AAA_FIP	NP_057055.2	MRPS7	0|0|3|4|5|5|0|3|3|0|0|0	2|3|3|5	13	3.25	0	0.65	0.85
FlagBirA-PPP1R35_AAA_FIP	NP_005821.2	MRPS31	0|0|3|0|0|0|0|0|0|0|0|0	3|7|6|5	21	5.25	0.22	3.5	0.53
FlagBirA-PPP1R35_AAA_FIP	NP_003282.2	TPP2	19|14|0|0|0|0|34|31|32|27|20|18	25|30|21|16	92	23	0	0.7	0.93
FlagBirA-PPP1R35_AAA_FIP	NP_057260.2	SDF4	3|4|5|5|0|4|7|7|3|5|4|5	8|8|5|6	27	6.75	0	0.96	0.87
FlagBirA-PPP1R35_AAA_FIP	NP_077718.3	NDUFS7	0|0|0|0|0|0|4|4|4|0|4|4	3|0|6|3	12	3	0	0.75	0.79
FlagBirA-PPP1R35_AAA_FIP	NP_751945.2	EIF2B4	6|3|6|6|2|2|4|3|2|2|11|10	7|3|2|5	17	4.25	0	0.4	0.91
FlagBirA-PPP1R35_AAA_FIP	NP_005735.2	ARIH1	0|3|2|0|0|0|6|6|5|5|4|2	7|7|6|6	26	6.5	0	1.08	0.85
FlagBirA-PPP1R35_AAA_FIP	NP_001120690.1	POLD2	4|5|0|0|0|0|3|2|4|5|4|3	7|7|6|4	24	6	0	1.2	0.81
FlagBirA-PPP1R35_AAA_FIP	NP_001120800.1	ACADM	4|3|0|0|0|0|2|7|7|3|4|7	12|7|3|2	24	6	0	0.86	0.82
FlagBirA-PPP1R35_AAA_FIP	NP_055486.2	UBE3C	3|6|2|0|2|0|9|8|12|9|8|11	9|12|4|3	28	7	0	0.61	0.9
FlagBirA-PPP1R35_AAA_FIP	NP_001120793.1	CBX5	0|3|0|0|0|0|3|5|6|3|0|0	4|5|2|0	11	2.75	0	0.5	0.86
FlagBirA-PPP1R35_AAA_FIP	NP_001120792.1	UBAP2L	6|0|3|6|6|8|9|13|16|11|5|3	19|15|14|13	61	15.25	0	1.05	0.9
FlagBirA-PPP1R35_AAA_FIP	NP_055686.3	PAN2	0|0|0|0|0|0|2|0|0|0|0|0	3|2|0|2	7	1.75	0.05	1.75	0.64
FlagBirA-PPP1R35_AAA_FIP	NP_570844.1	OPA1	0|3|0|0|0|0|0|0|5|3|8|10	6|8|0|0	14	3.5	0	0.39	0.9
FlagBirA-PPP1R35_AAA_FIP	NP_036387.2	XRN2	0|0|4|2|0|4|3|0|0|2|3|5	10|10|19|8	47	11.75	0.25	2.61	0.41
FlagBirA-PPP1R35_AAA_FIP	NP_808881.3	PDE12	6|4|0|0|0|0|8|7|6|10|11|6	5|11|7|8	31	7.75	0	0.74	0.9
FlagBirA-PPP1R35_AAA_FIP	NP_001121093.1	GALE	16|13|0|0|0|0|24|19|9|7|13|14	15|11|3|6	35	8.75	0	0.41	0.93
FlagBirA-PPP1R35_AAA_FIP	NP_001121164.1	PCCA	0|0|0|0|12|8|2|3|0|0|0|0	2|0|0|0	2	0.5	0	0.05	0.94
FlagBirA-PPP1R35_AAA_FIP	NP_001121188.1	ETFA	31|37|0|0|0|0|37|32|27|24|29|23	19|24|25|23	91	22.75	0	0.61	0.94
FlagBirA-PPP1R35_AAA_FIP	NP_001121361.1	SPG21	6|6|0|0|0|0|15|12|15|11|0|0	3|9|0|0	12	3	0	0.2	0.92
FlagBirA-PPP1R35_AAA_FIP	NP_612638.3	HINT3	5|4|4|0|0|0|5|5|5|5|7|9	5|5|0|0	10	2.5	0	0.31	0.9
FlagBirA-PPP1R35_AAA_FIP	NP_054735.3	SACM1L	9|8|0|0|3|3|22|17|13|16|17|10	19|18|6|10	53	13.25	0	0.68	0.92
FlagBirA-PPP1R35_AAA_FIP	NP_060579.3	MTPAP	3|0|0|0|0|0|2|2|0|3|3|2	3|3|0|2	8	2	0	0.67	0.79
FlagBirA-PPP1R35_AAA_FIP	NP_064508.3	TM9SF3	7|3|2|3|3|0|5|0|4|4|0|3	3|0|0|0	3	0.75	0	0.12	0.89
FlagBirA-PPP1R35_AAA_FIP	NP_004209.2	RAB11B	0|11|3|27|26|26|23|18|6|9|42|32	3|0|9|2	14	3.5	0	0.09	0.94
FlagBirA-PPP1R35_AAA_FIP	NP_004246.2	COX5A	6|7|16|16|10|13|12|7|9|7|10|9	6|0|2|2	10	2.5	0	0.16	0.94
FlagBirA-PPP1R35_AAA_FIP	NP_079095.3	DCAKD	6|6|0|0|3|0|10|9|4|4|5|6	7|4|5|4	20	5	0	0.53	0.9
FlagBirA-PPP1R35_AAA_FIP	NP_071349.3	UBE2O	0|0|0|0|0|0|0|0|0|0|0|0	3|4|0|0	7	1.75	0.49	17.5	0.28
FlagBirA-PPP1R35_AAA_FIP	NP_001122324.1	SRRT	17|10|0|0|0|0|14|15|17|9|11|7	29|26|14|21	90	22.5	0	1.32	0.89
FlagBirA-PPP1R35_AAA_FIP	NP_598399.2	GTPBP3	5|0|0|0|0|0|5|3|4|3|6|7	3|6|3|0	12	3	0	0.46	0.88
FlagBirA-PPP1R35_AAA_FIP	NP_003625.2	NIPSNAP1	0|0|0|3|0|0|0|0|0|0|0|0	3|0|0|0	3	0.75	0.01	0.5	0.71
FlagBirA-PPP1R35_AAA_FIP	NP_001123291.1	CYB5R3	0|3|13|10|12|13|6|7|3|5|6|8	5|2|3|4	14	3.5	0	0.27	0.94
FlagBirA-PPP1R35_AAA_FIP	NP_002757.2	PRPSAP1	8|11|7|6|13|12|17|14|13|7|7|10	14|14|11|17	56	14	0	0.9	0.91
FlagBirA-PPP1R35_AAA_FIP	NP_004083.3	ECHS1	11|7|0|0|0|0|0|10|6|9|9|9	8|8|6|6	28	7	0	0.67	0.9
FlagBirA-PPP1R35_AAA_FIP	NP_060117.3	FTSJ3	0|0|0|0|0|0|0|0|4|0|0|0	5|9|6|4	24	6	0.16	3	0.6
FlagBirA-PPP1R35_AAA_FIP	NP_001123995.1	CSDE1	7|6|0|0|0|0|7|9|16|15|9|6	13|15|9|7	44	11	0	0.71	0.92
FlagBirA-PPP1R35_AAA_FIP	NP_003582.2	CUL2	15|14|2|0|4|3|9|11|11|12|6|13	3|7|8|0	18	4.5	0	0.31	0.94
FlagBirA-PPP1R35_AAA_FIP	NP_002797.3	PSMC6	33|38|30|27|25|19|32|37|40|35|35|35	31|34|30|34	129	32.25	0	0.83	0.93
FlagBirA-PPP1R35_AAA_FIP	NP_001124295.1	DNMT1	8|4|7|6|0|7|4|6|7|8|4|2	24|17|15|7	63	15.75	0.22	1.97	0.53
FlagBirA-PPP1R35_AAA_FIP	NP_003720.1	RTCD1	19|16|3|0|9|5|21|26|13|16|6|16	14|18|7|7	46	11.5	0	0.49	0.93
FlagBirA-PPP1R35_AAA_FIP	NP_064716.2	RARS2	0|0|0|0|0|0|5|3|0|0|0|0	5|5|4|0	14	3.5	0	0.88	0.8
FlagBirA-PPP1R35_AAA_FIP	NP_003906.2	CPNE1	41|39|3|3|0|0|37|32|35|28|31|26	28|31|17|16	92	23	0	0.57	0.94
FlagBirA-PPP1R35_AAA_FIP	NP_060501.3	WDR6	0|0|5|0|0|0|0|0|5|6|0|0	7|3|2|0	12	3	0	0.55	0.84
FlagBirA-PPP1R35_AAA_FIP	NP_075566.2	PYCRL	3|0|0|0|4|0|3|0|0|2|4|4	3|3|4|0	10	2.5	0	0.62	0.83
FlagBirA-PPP1R35_AAA_FIP	NP_001128251.1	IPO11	8|9|0|0|0|0|16|17|13|8|4|7	4|5|3|0	12	3	0	0.18	0.94
FlagBirA-PPP1R35_AAA_FIP	NP_006444.2	TBL3	15|19|6|6|4|7|22|27|19|20|16|11	25|19|12|14	70	17.5	0	0.71	0.93
FlagBirA-PPP1R35_AAA_FIP	NP_078941.2	TBL1XR1	3|3|0|0|0|0|0|3|4|4|0|0	5|5|2|0	12	3	0	0.75	0.81
FlagBirA-PPP1R35_AAA_FIP	NP_001058.2	TOP2A	2|3|0|3|0|0|5|3|21|21|0|0	14|21|0|2	37	9.25	0	0.44	0.92
FlagBirA-PPP1R35_AAA_FIP	NP_001059.2	TOP2B	7|8|0|0|0|0|0|0|5|5|0|0	7|10|3|0	20	5	0	0.67	0.86
FlagBirA-PPP1R35_AAA_FIP	NP_055018.2	AP2A1	12|11|6|5|0|4|11|7|17|10|12|10	25|22|13|8	68	17	0	1.17	0.88
FlagBirA-PPP1R35_AAA_FIP	NP_002256.2	KPNB1	124|117|84|79|82|85|102|107|89|84|98|110	102|81|87|82	352	88	0	0.73	0.94
FlagBirA-PPP1R35_AAA_FIP	NP_003923.2	ST13	0|0|0|0|0|0|0|0|0|0|0|0	2|0|0|0	2	0.5	0.2	5	0.53
FlagBirA-PPP1R35_AAA_FIP	NP_056273.2	MTMR9	3|0|0|0|0|0|6|4|4|10|0|0	10|7|3|5	25	6.25	0	0.78	0.87
FlagBirA-PPP1R35_AAA_FIP	NP_057508.2	LUC7L3	6|7|8|10|4|6|13|10|11|9|7|6	9|10|11|11	41	10.25	0	0.85	0.91
FlagBirA-PPP1R35_AAA_FIP	NP_061936.2	EML4	6|8|0|0|0|0|4|7|5|6|7|8	9|9|5|3	26	6.5	0	0.81	0.88
FlagBirA-PPP1R35_AAA_FIP	NP_079359.2	EDC3	10|11|0|0|0|0|11|15|5|11|9|9	9|4|11|9	33	8.25	0	0.63	0.91
FlagBirA-PPP1R35_AAA_FIP	NP_036546.2	RAB3GAP2	19|19|3|4|0|3|23|21|20|19|32|33	20|21|16|17	74	18.5	0	0.57	0.93
FlagBirA-PPP1R35_AAA_FIP	NP_057022.2	NMD3	0|0|7|9|7|6|0|0|2|2|2|0	7|6|0|4	17	4.25	0	0.53	0.89
FlagBirA-PPP1R35_AAA_FIP	NP_612426.1	KTI12	0|0|0|0|0|0|0|0|0|0|2|5	4|0|0|0	4	1	0	0.29	0.81
FlagBirA-PPP1R35_AAA_FIP	NP_005723.2	RAD50	29|20|16|25|14|17|18|17|17|23|11|6	37|37|25|25	124	31	0	1.15	0.92
FlagBirA-PPP1R35_AAA_FIP	NP_000909.2	P4HB	3|5|0|0|0|0|5|8|3|7|0|2	6|10|9|6	31	7.75	0	1.03	0.86
FlagBirA-PPP1R35_AAA_FIP	NP_005207.2	DDOST	18|16|31|27|35|35|22|19|32|23|13|12	17|21|22|22	82	20.5	0	0.59	0.94
FlagBirA-PPP1R35_AAA_FIP	NP_006100.2	PRMT5	4|7|152|148|165|167|7|7|21|23|0|0	16|15|19|15	65	16.25	0	0.1	0.94
FlagBirA-PPP1R35_AAA_FIP	NP_056271.2	COBRA1	16|22|2|2|0|0|34|26|17|17|15|15	23|23|6|12	64	16	0	0.53	0.93
FlagBirA-PPP1R35_AAA_FIP	NP_079426.2	TARS2	13|13|5|10|7|6|9|7|11|10|13|14	14|10|11|16	51	12.75	0	0.94	0.9
FlagBirA-PPP1R35_AAA_FIP	NP_001128409.1	FIP1L1	12|7|0|0|2|0|11|7|9|10|0|4	16|18|9|8	51	12.75	0	1.11	0.88
FlagBirA-PPP1R35_AAA_FIP	NP_000173.2	HADHA	64|68|24|24|17|20|78|67|61|55|45|57	60|54|77|66	257	64.25	0	0.88	0.94
FlagBirA-PPP1R35_AAA_FIP	NP_002680.2	POLA2	8|11|0|0|0|0|10|6|6|5|0|0	9|6|6|10	31	7.75	0	0.74	0.9
FlagBirA-PPP1R35_AAA_FIP	NP_071350.2	C14orf133	0|0|0|0|0|0|0|2|0|0|0|0	2|3|0|0	5	1.25	0.04	1.25	0.65
FlagBirA-PPP1R35_AAA_FIP	NP_065752.1	ISY1	0|0|0|0|0|0|0|0|0|0|0|0	2|0|0|0	2	0.5	0.2	5	0.53
FlagBirA-PPP1R35_AAA_FIP	NP_031381.2	HSP90AB1	292|291|157|162|159|157|288|270|245|264|270|313	219|207|336|332	1094	273.5	0	0.9	0.94
FlagBirA-PPP1R35_AAA_FIP	NP_056325.2	DHRS7B	0|0|0|3|2|0|15|13|3|6|0|0	3|6|4|5	18	4.5	0	0.32	0.92
FlagBirA-PPP1R35_AAA_FIP	NP_057439.2	DDX47	6|3|0|4|4|3|3|2|4|4|4|2	10|11|9|12	42	10.5	0.01	2.1	0.71
FlagBirA-PPP1R35_AAA_FIP	NP_612403.2	HNRPLL	5|4|4|3|2|0|2|3|3|3|3|7	12|13|12|8	45	11.25	0	1.88	0.75
FlagBirA-PPP1R35_AAA_FIP	NP_620124.1	RHOT2	0|0|4|0|0|4|0|0|4|3|0|0	4|6|0|0	10	2.5	0	0.62	0.79
FlagBirA-PPP1R35_AAA_FIP	NP_620147.1	LEO1	0|0|0|0|0|0|0|0|0|0|0|0	3|0|0|0	3	0.75	0.24	7.5	0.48
FlagBirA-PPP1R35_AAA_FIP	NP_055781.2	DHX30	0|0|24|21|16|11|4|0|4|5|0|0	8|12|6|6	32	8	0	0.36	0.93
FlagBirA-PPP1R35_AAA_FIP	NP_620412.1	MSI2	3|0|0|0|0|0|6|13|7|7|5|3	12|18|8|10	48	12	0	1.2	0.85
FlagBirA-PPP1R35_AAA_FIP	NP_005138.3	DNAJA3	8|10|8|5|12|9|13|16|9|13|9|9	19|16|14|19	68	17	0	1.17	0.9
FlagBirA-PPP1R35_AAA_FIP	NP_065998.3	KIAA1609	6|8|0|0|0|0|17|12|7|8|0|0	3|4|0|0	7	1.75	0	0.12	0.94
FlagBirA-PPP1R35_AAA_FIP	NP_001128633.1	COMT	5|6|5|7|6|6|11|10|7|7|3|4	12|11|4|0	27	6.75	0	0.64	0.89
FlagBirA-PPP1R35_AAA_FIP	NP_071896.8	NOC3L	0|0|0|0|0|0|0|0|0|0|0|0	3|3|6|0	12	3	0.73	30	0.08
FlagBirA-PPP1R35_AAA_FIP	NP_001129108.1	PIP5K1A	2|0|0|0|0|0|0|0|0|2|0|0	3|2|0|3	8	2	0	1	0.74
FlagBirA-PPP1R35_AAA_FIP	NP_001129115.1	DCTN4	2|6|2|4|0|0|7|5|5|8|5|5	7|6|2|3	18	4.5	0	0.6	0.88
FlagBirA-PPP1R35_AAA_FIP	NP_071769.2	ATL2	4|4|0|0|0|0|5|8|6|7|4|6	3|5|0|0	8	2	0	0.27	0.89
FlagBirA-PPP1R35_AAA_FIP	NP_001129122.1	EEF1E1	8|7|9|13|9|11|12|11|7|11|4|8	11|11|9|7	38	9.5	0	0.76	0.91
FlagBirA-PPP1R35_AAA_FIP	NP_624311.1	PPIL4	0|2|0|0|0|3|0|0|0|5|0|0	4|7|3|6	20	5	0	1.25	0.77
FlagBirA-PPP1R35_AAA_FIP	NP_001129224.1	ECD	3|0|0|0|0|0|5|7|8|10|0|0	4|5|8|4	21	5.25	0	0.58	0.9
FlagBirA-PPP1R35_AAA_FIP	NP_001129243.1	RPN2	18|18|23|18|28|32|14|17|27|31|11|16	19|21|16|19	75	18.75	0	0.6	0.94
FlagBirA-PPP1R35_AAA_FIP	NP_001129507.1	TRMT1	7|5|5|9|4|3|10|10|9|7|4|4	21|21|8|12	62	15.5	0	1.55	0.79
FlagBirA-PPP1R35_AAA_FIP	NP_001129671.1	GRAMD1A	0|2|9|3|10|5|2|4|0|0|0|0	4|5|2|0	11	2.75	0	0.29	0.91
FlagBirA-PPP1R35_AAA_FIP	NP_001129665.1	FASTKD2	0|0|0|2|2|3|3|4|3|9|6|6	4|5|5|5	19	4.75	0	0.63	0.89
FlagBirA-PPP1R35_AAA_FIP	NP_631908.1	TRUB1	4|10|0|0|0|0|7|8|10|4|6|0	7|9|5|0	21	5.25	0	0.53	0.9
FlagBirA-PPP1R35_AAA_FIP	NP_005795.2	DDX39A	80|76|58|62|66|58|56|69|57|55|66|61	59|59|55|51	224	56	0	0.72	0.94
FlagBirA-PPP1R35_AAA_FIP	NP_003062.2	HLTF	0|3|0|0|0|0|0|0|2|0|0|0	2|0|2|0	4	1	0	0.4	0.79
FlagBirA-PPP1R35_AAA_FIP	NP_001131026.1	MCTS1	24|25|0|0|0|0|36|43|34|31|17|18	20|21|17|16	74	18.5	0	0.47	0.94
FlagBirA-PPP1R35_AAA_FIP	NP_001131074.1	MEMO1	2|3|0|0|0|0|2|0|3|4|0|0	3|8|5|3	19	4.75	0.01	1.36	0.72
FlagBirA-PPP1R35_AAA_FIP	NP_061887.2	POLR1B	10|12|0|0|0|0|7|10|17|13|10|18	15|15|8|9	47	11.75	0	0.67	0.92
FlagBirA-PPP1R35_AAA_FIP	NP_061184.1	COG1	0|0|0|0|0|0|3|0|2|0|0|2	9|7|0|3	19	4.75	0.19	1.9	0.6
FlagBirA-PPP1R35_AAA_FIP	NP_057322.2	ANAPC7	2|3|0|0|0|0|6|3|8|10|2|2	6|6|8|3	23	5.75	0	0.64	0.9
FlagBirA-PPP1R35_AAA_FIP	NP_003070.3	SMARCE1	0|0|0|0|0|0|2|0|0|2|0|0	2|3|0|3	8	2	0	1	0.74
FlagBirA-PPP1R35_AAA_FIP	NP_001132989.1	PRKRA	0|2|0|0|0|0|4|9|4|6|0|0	11|9|0|0	20	5	0	0.67	0.85
FlagBirA-PPP1R35_AAA_FIP	NP_005021.2	PLK1	2|0|0|0|0|0|0|4|4|5|0|3	3|3|6|9	21	5.25	0	1.17	0.76
FlagBirA-PPP1R35_AAA_FIP	NP_071741.2	NCAPG	26|31|9|13|8|6|34|22|23|23|31|24	26|29|18|13	86	21.5	0	0.66	0.93
FlagBirA-PPP1R35_AAA_FIP	NP_077297.2	RBM42	0|0|0|0|0|0|0|0|0|0|0|0	2|0|0|0	2	0.5	0.2	5	0.53
FlagBirA-PPP1R35_AAA_FIP	NP_110409.2	CLPTM1L	0|0|3|0|0|3|0|3|6|3|0|0	3|0|0|0	3	0.75	0	0.17	0.86
FlagBirA-PPP1R35_AAA_FIP	NP_003696.2	SLC25A12	0|0|0|0|0|0|0|6|9|11|0|0	13|12|9|0	34	8.5	0	0.85	0.88
FlagBirA-PPP1R35_AAA_FIP	NP_002795.2	PSMC3	36|36|16|18|17|18|55|60|49|54|39|35	52|60|26|53	191	47.75	0	0.83	0.94
FlagBirA-PPP1R35_AAA_FIP	NP_001960.2	EIF5	7|6|0|0|0|0|5|8|7|5|4|4	4|7|0|4	15	3.75	0	0.5	0.89
FlagBirA-PPP1R35_AAA_FIP	NP_006800.2	TOMM34	26|28|4|0|3|2|34|26|26|25|30|27	13|19|24|20	76	19	0	0.59	0.93
FlagBirA-PPP1R35_AAA_FIP	NP_006835.2	ILVBL	10|10|7|8|10|5|13|14|13|14|8|6	14|10|6|9	39	9.75	0	0.7	0.91
FlagBirA-PPP1R35_AAA_FIP	NP_002851.2	ALDH18A1	28|26|5|5|8|5|29|23|23|19|21|24	29|18|19|28	94	23.5	0	0.82	0.93
FlagBirA-PPP1R35_AAA_FIP	NP_055040.2	PPP2R1A	49|53|23|26|24|26|51|50|42|34|50|50	51|47|43|44	185	46.25	0	0.89	0.94
FlagBirA-PPP1R35_AAA_FIP	NP_055315.2	HTATSF1	3|4|0|0|0|0|13|10|16|13|3|5	13|11|10|10	44	11	0	0.76	0.91
FlagBirA-PPP1R35_AAA_FIP	NP_037460.2	PYCR2	21|20|14|16|20|24|13|14|10|11|20|13	22|18|12|8	60	15	0	0.67	0.92
FlagBirA-PPP1R35_AAA_FIP	NP_056277.2	NOL11	4|2|0|0|0|0|0|4|4|5|9|8	3|2|0|3	8	2	0	0.24	0.94
FlagBirA-PPP1R35_AAA_FIP	NP_054768.2	ACAD9	3|3|0|0|0|0|5|2|0|0|11|11	4|3|3|0	10	2.5	0	0.23	0.92
FlagBirA-PPP1R35_AAA_FIP	NP_056485.2	SENP3	0|2|0|0|0|0|0|0|4|4|0|0	4|4|8|11	27	6.75	0.04	1.69	0.65
FlagBirA-PPP1R35_AAA_FIP	NP_056937.2	UBXN1	3|3|3|0|0|0|4|2|3|3|7|7	4|0|5|0	9	2.25	0	0.32	0.89
FlagBirA-PPP1R35_AAA_FIP	NP_002930.2	RNH1	8|6|12|14|13|14|4|3|5|7|3|5	8|5|5|9	27	6.75	0	0.48	0.92
FlagBirA-PPP1R35_AAA_FIP	NP_002624.2	PGM1	22|26|0|0|0|0|16|20|11|9|6|4	12|10|21|20	63	15.75	0	0.66	0.93
FlagBirA-PPP1R35_AAA_FIP	NP_060773.3	EXOC2	5|3|0|0|0|0|8|4|5|5|0|0	7|8|4|0	19	4.75	0	0.73	0.86
FlagBirA-PPP1R35_AAA_FIP	NP_005304.3	PDIA3	0|0|0|0|0|0|0|0|0|3|0|0	3|0|0|0	3	0.75	0.01	0.5	0.71
FlagBirA-PPP1R35_AAA_FIP	NP_060555.2	IPO9	43|38|12|15|11|9|52|44|20|19|37|39	40|38|35|29	142	35.5	0	0.74	0.94
FlagBirA-PPP1R35_AAA_FIP	NP_060298.2	COMMD4	6|3|0|0|0|0|4|4|6|6|8|7	4|4|0|0	8	2	0	0.27	0.9
FlagBirA-PPP1R35_AAA_FIP	NP_057569.2	VTA1	14|12|0|0|0|0|18|17|19|19|17|13	13|15|12|12	52	13	0	0.68	0.92
FlagBirA-PPP1R35_AAA_FIP	NP_062826.2	METTL3	5|0|0|0|0|0|5|2|3|2|0|0	3|0|2|0	5	1.25	0	0.25	0.87
FlagBirA-PPP1R35_AAA_FIP	NP_062565.2	PARD3	0|4|0|0|0|0|0|0|0|0|0|0	3|2|0|0	5	1.25	0	0.62	0.73
FlagBirA-PPP1R35_AAA_FIP	NP_149075.2	FANCD2	3|3|0|0|3|0|7|12|4|3|6|5	6|6|0|0	12	3	0	0.32	0.9
FlagBirA-PPP1R35_AAA_FIP	NP_005975.1	SLC25A1	21|18|15|15|15|15|20|20|20|26|12|11	26|18|22|30	96	24	0	1.02	0.92
FlagBirA-PPP1R35_AAA_FIP	NP_004784.2	LONP1	62|52|11|4|3|4|53|56|35|29|61|72	80|83|40|37	240	60	0	0.9	0.94
FlagBirA-PPP1R35_AAA_FIP	NP_653081.1	OSBPL2	0|0|0|0|0|0|0|0|0|2|0|0	4|4|0|0	8	2	0.12	2	0.61
FlagBirA-PPP1R35_AAA_FIP	NP_001135766.1	SPG20	5|7|7|8|0|0|9|12|15|13|4|6	5|3|5|6	19	4.75	0	0.34	0.94
FlagBirA-PPP1R35_AAA_FIP	NP_001135836.1	ALG5	0|0|0|0|0|0|8|10|6|6|0|0	3|0|0|0	3	0.75	0	0.08	0.91
FlagBirA-PPP1R35_AAA_FIP	NP_001814.2	CKB	10|9|2|5|0|0|8|12|8|14|3|0	15|9|3|0	27	6.75	0	0.52	0.9
FlagBirA-PPP1R35_AAA_FIP	NP_644671.1	STAT1	0|0|0|0|0|0|3|7|11|12|6|9	7|2|4|3	16	4	0	0.35	0.91
FlagBirA-PPP1R35_AAA_FIP	NP_001135887.1	AIMP1	29|34|14|20|23|19|27|38|31|24|31|25	23|27|22|18	90	22.5	0	0.62	0.93
FlagBirA-PPP1R35_AAA_FIP	NP_001136067.1	P4HA1	0|0|0|0|0|0|0|0|0|0|0|0	9|12|5|4	30	7.5	1	75	0
FlagBirA-PPP1R35_AAA_FIP	NP_004238.3	EFTUD2	41|35|65|70|59|69|34|38|40|39|20|24	52|56|32|35	175	43.75	0	0.63	0.94
FlagBirA-PPP1R35_AAA_FIP	NP_060726.3	WDR12	0|5|0|0|0|0|2|6|4|5|0|0	5|2|0|0	7	1.75	0	0.32	0.87
FlagBirA-PPP1R35_AAA_FIP	NP_006704.3	SUB1	0|2|23|24|27|32|10|10|17|17|0|0	15|15|0|3	33	8.25	0	0.28	0.93
FlagBirA-PPP1R35_AAA_FIP	NP_001136120.1	SAR1A	8|5|2|0|2|0|16|15|24|23|11|14	10|15|8|7	40	10	0	0.43	0.93
FlagBirA-PPP1R35_AAA_FIP	NP_079152.3	ADCK4	4|0|2|0|0|0|0|4|0|4|0|0	4|5|4|0	13	3.25	0	0.81	0.81
FlagBirA-PPP1R35_AAA_FIP	NP_060533.2	HELLS	5|7|0|0|0|0|8|11|6|6|10|13	5|4|8|4	21	5.25	0	0.44	0.91
FlagBirA-PPP1R35_AAA_FIP	NP_001137359.1	COPS2	10|12|2|0|0|0|11|11|8|8|15|14	15|14|4|6	39	9.75	0	0.67	0.91
FlagBirA-PPP1R35_AAA_FIP	NP_060551.2	WRAP53	0|0|0|0|0|0|0|0|0|0|0|0	5|5|3|0	13	3.25	0.74	32.5	0.07
FlagBirA-PPP1R35_AAA_FIP	NP_056444.3	PRPF31	17|11|51|49|53|58|11|11|3|2|9|11	26|22|25|23	96	24	0	0.43	0.94
FlagBirA-PPP1R35_AAA_FIP	NP_001138238.1	DNAJC7	28|26|6|5|3|3|27|27|14|18|26|28	15|18|20|18	71	17.75	0	0.63	0.93
FlagBirA-PPP1R35_AAA_FIP	NP_001138303.1	PHB2	4|3|38|31|39|44|10|10|22|20|0|0	14|10|9|10	43	10.75	0	0.26	0.94
FlagBirA-PPP1R35_AAA_FIP	NP_001137457.1	BANF1	19|14|0|0|0|0|11|17|5|5|8|9	8|5|5|5	23	5.75	0	0.32	0.93
FlagBirA-PPP1R35_AAA_FIP	NP_004323.2	BPHL	0|0|0|0|0|0|0|0|0|0|0|0	4|4|0|0	8	2	0.5	20	0.25
FlagBirA-PPP1R35_AAA_FIP	NP_001137533.1	COPB1	49|48|35|36|28|28|69|67|61|61|59|72	62|57|42|43	204	51	0	0.72	0.94
FlagBirA-PPP1R35_AAA_FIP	NP_001137474.1	CTPS2	17|15|0|0|0|0|27|32|18|16|20|19	20|21|4|4	49	12.25	0	0.42	0.93
FlagBirA-PPP1R35_AAA_FIP	NP_078938.2	NAT10	0|0|0|0|0|0|0|0|3|2|0|0	4|8|3|2	17	4.25	0.09	1.7	0.62
FlagBirA-PPP1R35_AAA_FIP	NP_665861.1	CHEK2	0|0|0|0|0|0|0|3|0|0|0|0	6|0|0|0	6	1.5	0.07	1	0.63
FlagBirA-PPP1R35_AAA_FIP	NP_005947.3	MTHFD1	97|103|47|44|44|53|109|124|86|97|87|91	123|114|78|75	390	97.5	0	0.84	0.94
FlagBirA-PPP1R35_AAA_FIP	NP_149107.4	NEK9	0|0|0|0|0|0|6|4|4|2|3|0	9|16|4|3	32	8	0.2	1.6	0.53
FlagBirA-PPP1R35_AAA_FIP	NP_671701.1	NUDT2	3|0|0|0|0|0|5|4|4|4|0|0	4|2|0|0	6	1.5	0	0.33	0.85
FlagBirA-PPP1R35_AAA_FIP	NP_060855.2	LSG1	0|0|0|0|0|0|0|0|0|0|0|0	5|6|8|8	27	6.75	1	67.5	0
FlagBirA-PPP1R35_AAA_FIP	NP_055994.2	RRP12	0|0|2|3|5|0|0|0|0|0|0|0	5|7|4|7	23	5.75	0	1.44	0.76
FlagBirA-PPP1R35_AAA_FIP	NP_066957.3	MRPL23	0|0|0|0|0|0|0|0|0|0|0|0	2|0|0|0	2	0.5	0.2	5	0.53
FlagBirA-PPP1R35_AAA_FIP	NP_060720.2	INTS9	0|4|0|0|0|0|6|5|0|0|0|0	4|0|4|6	14	3.5	0	0.64	0.85
FlagBirA-PPP1R35_AAA_FIP	NP_001138638.1	PRMT3	3|6|4|5|4|4|12|8|18|15|6|6	11|9|13|13	46	11.5	0	0.7	0.92
FlagBirA-PPP1R35_AAA_FIP	NP_699160.2	ALDH16A1	10|9|2|0|0|0|16|15|9|10|10|10	7|9|3|3	22	5.5	0	0.35	0.92
FlagBirA-PPP1R35_AAA_FIP	NP_055699.2	SUGP2	0|0|0|0|0|0|0|0|0|0|0|0	8|4|5|0	17	4.25	0.75	42.5	0.06
FlagBirA-PPP1R35_AAA_FIP	NP_055568.3	BMS1	0|0|12|12|13|13|0|0|2|0|0|0	7|3|10|11	31	7.75	0	0.6	0.91
FlagBirA-PPP1R35_AAA_FIP	NP_060596.2	TMEM33	2|2|4|2|5|4|4|3|7|5|8|7	3|3|7|5	18	4.5	0	0.6	0.89
FlagBirA-PPP1R35_AAA_FIP	NP_001139197.1	LYAR	2|3|16|16|16|12|0|0|3|0|0|0	9|13|4|0	26	6.5	0	0.41	0.92
FlagBirA-PPP1R35_AAA_FIP	NP_060365.7	DDX27	0|0|0|0|0|0|0|0|0|0|0|0	4|3|0|0	7	1.75	0.49	17.5	0.28
FlagBirA-PPP1R35_AAA_FIP	NP_660298.2	MRPL10	0|2|0|0|0|0|3|4|2|2|0|0	3|4|0|0	7	1.75	0	0.5	0.81
FlagBirA-PPP1R35_AAA_FIP	NP_057040.2	MRPL4	0|0|0|0|0|0|0|0|0|0|0|0	2|0|0|0	2	0.5	0.2	5	0.53
FlagBirA-PPP1R35_AAA_FIP	NP_004160.3	SHMT1	6|9|0|0|0|0|14|13|6|6|2|3	3|5|7|5	20	5	0	0.37	0.92
FlagBirA-PPP1R35_AAA_FIP	NP_680480.1	PPIL2	0|3|0|0|0|0|0|0|3|3|0|0	3|0|0|0	3	0.75	0	0.25	0.81
FlagBirA-PPP1R35_AAA_FIP	NP_057195.2	TELO2	10|13|9|8|10|7|13|11|9|15|21|17	9|11|14|15	49	12.25	0	0.64	0.92
FlagBirA-PPP1R35_AAA_FIP	NP_078880.2	RPAP3	0|0|0|0|0|0|3|0|2|4|0|0	4|5|2|2	13	3.25	0	0.93	0.79
FlagBirA-PPP1R35_AAA_FIP	NP_078954.4	NARS2	4|0|6|3|4|0|0|0|2|0|0|0	8|8|0|4	20	5	0	1	0.79
FlagBirA-PPP1R35_AAA_FIP	NP_689474.1	C12orf23	5|3|0|2|0|0|9|6|5|7|2|3	7|6|0|3	16	4	0	0.5	0.89
FlagBirA-PPP1R35_AAA_FIP	NP_689557.1	LSM12	0|0|0|0|0|0|0|0|0|0|0|0	4|0|0|0	4	1	0.25	10	0.45
FlagBirA-PPP1R35_AAA_FIP	NP_065801.1	XPO5	43|38|14|19|18|19|73|75|51|58|36|37	36|48|23|19	126	31.5	0	0.43	0.94
FlagBirA-PPP1R35_AAA_FIP	NP_689866.1	UBE2E2	7|4|7|7|7|7|5|5|4|4|4|5	5|4|7|6	22	5.5	0	0.79	0.88
FlagBirA-PPP1R35_AAA_FIP	NP_689926.1	STT3A	0|0|5|0|5|7|2|5|7|7|0|0	2|3|0|0	5	1.25	0	0.18	0.94
FlagBirA-PPP1R35_AAA_FIP	NP_060829.2	UFSP2	0|0|0|0|0|0|2|0|0|0|0|0	15|13|9|5	42	10.5	0.81	10.5	0.03
FlagBirA-PPP1R35_AAA_FIP	NP_690852.1	LRWD1	15|5|0|0|0|0|6|7|5|0|0|0	6|6|6|5	23	5.75	0	0.52	0.91
FlagBirA-PPP1R35_AAA_FIP	NP_056380.2	LTN1	14|5|3|8|4|5|8|8|8|11|7|8	6|7|7|4	24	6	0	0.48	0.94
FlagBirA-PPP1R35_AAA_FIP	NP_690042.1	TES	8|9|15|15|7|7|11|12|6|8|5|8	12|13|8|7	40	10	0	0.67	0.92
FlagBirA-PPP1R35_AAA_FIP	NP_689449.1	CDC42EP1	0|0|0|0|0|0|0|0|0|0|3|2	3|3|0|0	6	1.5	0	0.6	0.77
FlagBirA-PPP1R35_AAA_FIP	NP_006614.2	PHGDH	113|111|32|31|37|39|83|89|56|73|83|87	81|92|62|65	300	75	0	0.67	0.94
FlagBirA-PPP1R35_AAA_FIP	NP_006592.3	PTGES3	17|16|21|15|9|10|19|17|16|16|14|17	26|26|30|26	108	27	0	1.35	0.91
FlagBirA-PPP1R35_AAA_FIP	NP_003130.2	SRPR	14|15|22|17|17|15|29|24|18|24|18|17	14|16|21|14	65	16.25	0	0.61	0.93
FlagBirA-PPP1R35_AAA_FIP	NP_689953.1	HIBADH	5|4|0|0|0|0|5|6|6|4|0|0	8|8|6|6	28	7	0	1.17	0.84
FlagBirA-PPP1R35_AAA_FIP	NP_006351.2	EIF3M	33|26|7|8|12|10|25|33|34|30|15|20	30|26|12|9	77	19.25	0	0.57	0.93
FlagBirA-PPP1R35_AAA_FIP	NP_060561.3	ELP3	5|7|0|0|0|0|7|7|6|6|7|5	8|6|11|5	30	7.5	0	1.07	0.84
FlagBirA-PPP1R35_AAA_FIP	NP_003325.2	UBA1	3|3|0|0|0|0|4|6|2|3|6|5	3|2|8|5	18	4.5	0	0.75	0.84
FlagBirA-PPP1R35_AAA_FIP	NP_006730.2	MCM5	68|60|23|26|29|25|57|55|80|78|54|63	68|77|65|63	273	68.25	0	0.86	0.94
FlagBirA-PPP1R35_AAA_FIP	NP_001153408.1	EBNA1BP2	0|0|0|0|0|2|0|0|0|0|0|0	5|6|4|0	15	3.75	0.29	3.75	0.41
FlagBirA-PPP1R35_AAA_FIP	NP_001153682.1	SLC25A13	10|10|18|18|14|13|28|27|58|66|8|10	37|53|28|28	146	36.5	0	0.59	0.94
FlagBirA-PPP1R35_AAA_FIP	NP_113673.3	GRWD1	10|15|0|0|4|6|12|11|18|17|14|15	14|15|12|13	54	13.5	0	0.77	0.92
FlagBirA-PPP1R35_AAA_FIP	NP_005773.3	ALYREF	0|0|13|15|5|6|0|0|2|0|0|0	3|3|4|4	14	3.5	0	0.25	0.92
FlagBirA-PPP1R35_AAA_FIP	NP_060552.4	POLR3B	0|0|0|0|0|0|2|3|0|0|0|0	4|5|0|4	13	3.25	0	1.3	0.72
FlagBirA-PPP1R35_AAA_FIP	NP_115661.1	MRI1	13|12|7|5|8|7|13|13|12|13|9|11	10|13|9|7	39	9.75	0	0.75	0.91
FlagBirA-PPP1R35_AAA_FIP	NP_055417.1	PIK3R4	0|0|0|0|0|0|0|3|5|2|0|0	3|0|3|0	6	1.5	0	0.38	0.84
FlagBirA-PPP1R35_AAA_FIP	NP_078796.2	C2orf47	6|7|0|0|0|0|5|5|4|5|0|3	5|3|3|4	15	3.75	0	0.58	0.88
FlagBirA-PPP1R35_AAA_FIP	NP_060216.2	TEX10	10|10|0|0|0|0|13|13|10|11|11|10	18|24|9|9	60	15	0	1.15	0.86
FlagBirA-PPP1R35_AAA_FIP	NP_064560.2	DUS3L	3|4|0|0|0|0|0|3|5|4|7|2	7|8|6|3	24	6	0	1	0.84
FlagBirA-PPP1R35_AAA_FIP	NP_001030324.2	UFD1L	4|8|0|0|0|0|5|6|5|0|3|5	2|4|0|0	6	1.5	0	0.21	0.89
FlagBirA-PPP1R35_AAA_FIP	NP_004125.3	HSPA9	47|48|41|31|37|41|79|69|63|63|50|57	71|71|46|68	256	64	0	0.86	0.94
FlagBirA-PPP1R35_AAA_FIP	NP_005581.2	MRE11A	15|11|14|9|6|4|5|17|9|10|8|14	18|25|14|12	69	17.25	0	1.08	0.9
FlagBirA-PPP1R35_AAA_FIP	NP_004506.2	ILF2	98|102|34|25|24|26|102|91|100|98|113|113	141|111|85|81	418	104.5	0	0.92	0.94
FlagBirA-PPP1R35_AAA_FIP	NP_001369.1	DYNC1I2	7|4|6|0|8|0|6|8|3|6|4|3	4|2|2|0	8	2	0	0.25	0.94
FlagBirA-PPP1R35_AAA_FIP	NP_036205.1	CCT5	233|239|224|223|198|229|198|205|192|190|161|177	186|149|195|211	741	185.25	0	0.78	0.94
FlagBirA-PPP1R35_AAA_FIP	NP_055815.1	STK38L	48|49|156|165|108|106|35|36|57|54|4|2	43|51|55|51	200	50	0	0.31	0.94
FlagBirA-PPP1R35_AAA_FIP	NP_056138.1	UFL1	6|9|0|0|0|0|14|19|17|20|10|11	24|26|10|15	75	18.75	0	0.96	0.91
FlagBirA-PPP1R35_AAA_FIP	NP_056449.1	KIAA1279	24|20|0|0|0|0|30|21|24|24|11|4	13|19|11|14	57	14.25	0	0.53	0.93
FlagBirA-PPP1R35_AAA_FIP	NP_061854.1	DNAJC10	3|3|0|0|0|0|5|2|3|3|0|0	3|4|3|2	12	3	0	0.75	0.83
FlagBirA-PPP1R35_AAA_FIP	NP_065761.1	LRRC47	45|44|20|27|22|23|49|58|42|45|32|49	45|55|50|49	199	49.75	0	0.93	0.94
FlagBirA-PPP1R35_AAA_FIP	NP_065799.1	INTS2	5|3|0|0|0|0|5|4|2|0|10|10	3|5|3|0	11	2.75	0	0.28	0.91
FlagBirA-PPP1R35_AAA_FIP	NP_067045.1	PRUNE	7|4|0|0|0|0|3|4|5|4|8|12	6|6|5|5	22	5.5	0	0.55	0.91
FlagBirA-PPP1R35_AAA_FIP	NP_066012.1	METTL14	0|0|0|0|0|0|0|0|0|0|0|0	3|0|0|0	3	0.75	0.24	7.5	0.48
FlagBirA-PPP1R35_AAA_FIP	NP_115604.1	FAR1	0|4|4|4|4|4|5|3|12|11|0|0	3|3|2|0	8	2	0	0.17	0.94
FlagBirA-PPP1R35_AAA_FIP	NP_115824.1	FAM120B	0|0|2|0|0|0|0|0|3|0|2|0	3|7|2|6	18	4.5	0.04	1.8	0.65
FlagBirA-PPP1R35_AAA_FIP	NP_443157.1	LENG8	0|0|0|0|0|0|0|2|0|0|0|0	5|4|0|0	9	2.25	0.15	2.25	0.6
FlagBirA-PPP1R35_AAA_FIP	NP_612404.1	MARS2	0|0|0|0|0|0|0|5|0|0|0|0	4|0|2|0	6	1.5	0	0.6	0.74
FlagBirA-PPP1R35_AAA_FIP	NP_055426.1	MDN1	35|34|23|29|22|19|17|16|34|41|32|36	38|46|17|15	116	29	0	0.75	0.93
FlagBirA-PPP1R35_AAA_FIP	NP_005115.2	NUP153	3|3|0|0|0|0|7|6|11|14|5|4	25|19|13|18	75	18.75	0	1.5	0.84
FlagBirA-PPP1R35_AAA_FIP	NP_002793.2	PSMC1	47|38|23|25|18|23|28|35|27|24|28|29	36|35|24|28	123	30.75	0	0.72	0.94
FlagBirA-PPP1R35_AAA_FIP	NP_004688.2	PRPF4	7|4|2|0|0|0|7|7|6|9|7|12	9|7|5|4	25	6.25	0	0.6	0.9
FlagBirA-PPP1R35_AAA_FIP	NP_066997.3	KIAA1967	28|27|27|25|21|19|31|26|18|20|32|27	41|39|36|42	158	39.5	0	1.25	0.93
FlagBirA-PPP1R35_AAA_FIP	NP_612510.1	TECR	5|4|12|8|12|12|6|7|9|11|0|0	7|5|3|2	17	4.25	0	0.35	0.94
FlagBirA-PPP1R35_AAA_FIP	NP_722560.1	PTK2	0|3|0|0|0|0|7|5|2|2|0|4	3|3|0|0	6	1.5	0	0.25	0.89
FlagBirA-PPP1R35_AAA_FIP	NP_705931.1	NUP50	5|5|0|0|0|0|5|4|0|6|5|5	5|4|0|6	15	3.75	0	0.68	0.85
FlagBirA-PPP1R35_AAA_FIP	NP_002523.2	NUP88	3|3|0|0|0|0|4|5|7|5|3|5	9|6|4|0	19	4.75	0	0.79	0.83
FlagBirA-PPP1R35_AAA_FIP	NP_036478.2	NUP62	5|6|0|0|0|0|6|3|3|10|10|11	11|9|0|0	20	5	0	0.48	0.9
FlagBirA-PPP1R35_AAA_FIP	NP_002262.3	IPO5	32|35|34|34|38|33|32|25|14|19|32|31	20|20|29|27	96	24	0	0.66	0.94
FlagBirA-PPP1R35_AAA_FIP	NP_722546.1	PYCR1	8|4|8|10|11|12|8|6|4|3|8|8	7|9|6|4	26	6.5	0	0.57	0.91
FlagBirA-PPP1R35_AAA_FIP	NP_055428.1	FAF2	8|8|6|6|7|9|11|7|13|12|2|6	12|11|10|9	42	10.5	0	0.84	0.91
FlagBirA-PPP1R35_AAA_FIP	NP_036379.2	SEPHS1	7|8|0|0|0|0|12|14|3|3|7|7	6|6|4|5	21	5.25	0	0.4	0.92
FlagBirA-PPP1R35_AAA_FIP	NP_056156.2	NCAPH	5|7|10|11|6|8|12|12|12|10|16|13	14|17|21|18	70	17.5	0	1.21	0.9
FlagBirA-PPP1R35_AAA_FIP	NP_055608.2	LCMT2	0|0|0|0|0|0|0|0|0|0|0|0	2|2|0|0	4	1	0.39	10	0.36
FlagBirA-PPP1R35_AAA_FIP	NP_061832.2	DAZAP1	8|10|0|2|0|0|5|5|4|7|13|13	8|13|9|10	40	10	0	0.77	0.91
FlagBirA-PPP1R35_AAA_FIP	NP_001157567.1	COPS7A	4|8|0|0|0|0|5|5|2|0|2|4	2|0|8|5	15	3.75	0	0.58	0.86
FlagBirA-PPP1R35_AAA_FIP	NP_001157616.1	CHAMP1	4|4|0|0|0|0|5|6|7|10|0|2	17|16|12|7	52	13	0	1.53	0.8
FlagBirA-PPP1R35_AAA_FIP	NP_001074010.2	MGA	0|0|0|0|0|0|2|0|4|8|0|0	5|5|2|0	12	3	0	0.5	0.87
FlagBirA-PPP1R35_AAA_FIP	NP_009135.4	DDX20	7|6|4|6|0|7|7|6|7|6|5|5	12|13|7|4	36	9	0	1.29	0.8
FlagBirA-PPP1R35_AAA_FIP	NP_002798.2	PSMD1	32|20|69|71|64|57|27|41|31|39|22|22	8|14|14|12	48	12	0	0.17	0.94
FlagBirA-PPP1R35_AAA_FIP	NP_002799.3	PSMD2	48|47|73|75|53|55|48|61|41|53|43|50	54|43|38|43	178	44.5	0	0.6	0.94
FlagBirA-PPP1R35_AAA_FIP	NP_002800.2	PSMD3	32|30|61|55|54|53|37|33|35|31|19|20	29|29|27|27	112	28	0	0.48	0.94
FlagBirA-PPP1R35_AAA_FIP	NP_002802.2	PSMD7	25|20|25|17|20|13|20|20|16|18|10|11	25|16|4|5	50	12.5	0	0.5	0.93
FlagBirA-PPP1R35_AAA_FIP	NP_733936.1	ALDH5A1	9|6|0|0|0|0|3|5|2|3|0|3	3|3|4|4	14	3.5	0	0.47	0.9
FlagBirA-PPP1R35_AAA_FIP	NP_000683.3	ALDH1B1	9|11|0|0|0|0|9|10|4|8|14|16	9|11|9|6	35	8.75	0	0.58	0.92
FlagBirA-PPP1R35_AAA_FIP	NP_056121.2	USP24	10|7|3|0|0|0|9|8|6|5|17|10	10|5|7|4	26	6.5	0	0.48	0.92
FlagBirA-PPP1R35_AAA_FIP	NP_663782.2	AP1B1	14|15|0|7|6|11|21|17|14|13|4|0	15|9|8|0	32	8	0	0.42	0.92
FlagBirA-PPP1R35_AAA_FIP	NP_060700.2	NUP133	26|26|12|12|8|11|51|43|50|48|51|57	53|58|42|42	195	48.75	0	0.9	0.94
FlagBirA-PPP1R35_AAA_FIP	NP_001160060.1	EIF2B3	5|3|5|4|2|0|13|15|10|10|6|4	14|16|7|6	43	10.75	0	0.77	0.91
FlagBirA-PPP1R35_AAA_FIP	NP_001161086.1	LEMD3	0|0|0|0|0|0|0|0|3|4|0|0	4|5|0|0	9	2.25	0	0.64	0.79
FlagBirA-PPP1R35_AAA_FIP	NP_065116.3	XPNPEP1	0|0|0|0|0|0|2|3|3|2|0|0	5|7|0|0	12	3	0.01	1	0.71
FlagBirA-PPP1R35_AAA_FIP	NP_001161093.1	ATXN10	26|32|7|4|9|9|26|32|11|13|22|25	10|12|14|12	48	12	0	0.38	0.94
FlagBirA-PPP1R35_AAA_FIP	NP_001160158.1	PFKM	19|22|23|22|21|18|23|18|14|16|12|14	22|24|19|16	81	20.25	0	0.88	0.92
FlagBirA-PPP1R35_AAA_FIP	NP_065175.4	VARS2	3|5|0|0|0|0|9|7|2|3|8|6	7|9|0|0	16	4	0	0.47	0.89
FlagBirA-PPP1R35_AAA_FIP	NP_073739.3	YTHDC2	0|2|3|0|2|0|0|0|0|3|0|0	16|19|15|16	66	16.5	1	5.5	0
FlagBirA-PPP1R35_AAA_FIP	NP_060705.2	CNDP2	9|8|0|0|0|0|0|4|0|0|2|5	5|0|5|0	10	2.5	0	0.29	0.9
FlagBirA-PPP1R35_AAA_FIP	NP_060557.3	TMEM48	0|2|0|0|0|0|0|3|7|7|3|0	9|5|4|0	18	4.5	0	0.64	0.86
FlagBirA-PPP1R35_AAA_FIP	NP_663760.1	ATXN2L	0|0|0|0|0|0|2|0|0|0|0|0	3|3|3|2	11	2.75	0.1	2.75	0.62
FlagBirA-PPP1R35_AAA_FIP	NP_036437.1	AP2A2	11|14|6|0|5|0|20|17|17|9|12|11	23|20|7|7	57	14.25	0	0.77	0.91
FlagBirA-PPP1R35_AAA_FIP	NP_003963.1	BTAF1	9|8|0|3|0|2|18|14|15|17|7|12	9|14|4|6	33	8.25	0	0.47	0.92
FlagBirA-PPP1R35_AAA_FIP	NP_113671.3	ITCH	0|0|0|0|0|0|0|0|5|0|0|0	3|0|0|0	3	0.75	0	0.3	0.77
FlagBirA-PPP1R35_AAA_FIP	NP_057444.2	TACO1	0|0|0|0|0|7|4|0|5|0|0|3	8|7|4|8	27	6.75	0	1.12	0.84
FlagBirA-PPP1R35_AAA_FIP	NP_776216.1	MALT1	5|4|0|0|0|0|5|7|0|0|0|4	6|5|6|7	24	6	0	1	0.85
FlagBirA-PPP1R35_AAA_FIP	NP_005887.2	IDH1	12|18|0|0|0|0|20|18|11|19|12|11	10|8|0|0	18	4.5	0	0.23	0.94
FlagBirA-PPP1R35_AAA_FIP	NP_002159.2	IDH2	68|62|0|0|0|0|69|57|41|43|42|50	46|42|36|38	162	40.5	0	0.59	0.94
FlagBirA-PPP1R35_AAA_FIP	NP_008933.2	ADRM1	0|0|2|0|0|0|6|0|8|6|4|8	5|7|4|7	23	5.75	0	0.72	0.89
FlagBirA-PPP1R35_AAA_FIP	NP_057122.2	SBDS	5|6|0|0|0|2|9|6|10|11|8|9	11|10|8|8	37	9.25	0	0.88	0.9
FlagBirA-PPP1R35_AAA_FIP	NP_067026.3	SRPRB	6|8|8|9|10|12|14|13|10|11|12|15	7|7|7|6	27	6.75	0	0.47	0.94
FlagBirA-PPP1R35_AAA_FIP	NP_001165375.1	VPRBP	0|0|7|6|5|5|2|0|0|0|0|0	9|6|4|0	19	4.75	0	0.73	0.85
FlagBirA-PPP1R35_AAA_FIP	NP_002430.3	MSH3	2|8|0|0|0|0|7|8|13|11|8|7	14|15|6|9	44	11	0	0.92	0.9
FlagBirA-PPP1R35_AAA_FIP	NP_001076581.2	GPD2	4|6|0|2|0|0|7|10|12|14|9|4	11|7|6|7	31	7.75	0	0.6	0.91
FlagBirA-PPP1R35_AAA_FIP	NP_787103.1	ZADH2	0|0|0|0|0|0|0|0|0|0|2|0	4|5|0|2	11	2.75	0.16	2.75	0.6
FlagBirA-PPP1R35_AAA_FIP	NP_002806.2	PSMD11	30|31|56|52|39|45|36|35|38|44|24|32	33|36|24|24	117	29.25	0	0.54	0.94
FlagBirA-PPP1R35_AAA_FIP	NP_003819.1	MTMR1	0|4|0|0|0|0|0|0|0|0|0|0	3|2|0|0	5	1.25	0	0.62	0.73
FlagBirA-PPP1R35_AAA_FIP	NP_788276.1	CDK5RAP3	6|3|0|0|0|0|7|5|4|6|0|0	3|5|0|2	10	2.5	0	0.38	0.88
FlagBirA-PPP1R35_AAA_FIP	NP_001165903.1	PHKG2	0|4|0|3|2|2|6|6|6|6|4|2	2|3|0|0	5	1.25	0	0.21	0.94
FlagBirA-PPP1R35_AAA_FIP	NP_001165906.1	RAB3GAP1	2|4|0|0|0|0|11|5|8|7|17|15	7|7|0|2	16	4	0	0.25	0.93
FlagBirA-PPP1R35_AAA_FIP	NP_001166110.1	CELF1	13|11|0|0|0|0|8|11|4|5|6|7	10|11|8|3	32	8	0	0.67	0.91
FlagBirA-PPP1R35_AAA_FIP	NP_001166958.1	NKRF	0|0|0|0|0|0|0|0|0|3|2|2	6|6|3|3	18	4.5	0.02	1.8	0.68
FlagBirA-PPP1R35_AAA_FIP	NP_001167568.1	LDHB	11|10|9|9|5|4|17|18|15|12|9|5	12|8|15|11	46	11.5	0	0.66	0.92
FlagBirA-PPP1R35_AAA_FIP	NP_001171479.1	CBS	15|11|0|0|0|0|5|8|17|18|3|0	9|10|0|3	22	5.5	0	0.31	0.93
FlagBirA-PPP1R35_AAA_FIP	NP_001171481.1	CDC45	0|2|0|7|0|3|0|0|5|3|2|4	6|6|0|3	15	3.75	0	0.62	0.86
FlagBirA-PPP1R35_AAA_FIP	NP_001171748.1	GNL3L	0|0|0|0|0|0|0|0|3|0|0|0	3|3|5|7	18	4.5	0.16	3	0.6
FlagBirA-PPP1R35_AAA_FIP	NP_001171820.1	FLAD1	10|7|0|0|0|0|20|29|14|8|4|8	13|12|4|4	33	8.25	0	0.34	0.93
FlagBirA-PPP1R35_AAA_FIP	NP_149080.2	ZCCHC3	0|0|0|0|0|0|0|0|0|0|0|0	4|6|2|2	14	3.5	0.89	35	0.01
FlagBirA-PPP1R35_AAA_FIP	NP_061141.2	UNC45A	29|25|12|14|9|9|23|37|31|37|30|30	26|19|19|16	80	20	0	0.54	0.93
FlagBirA-PPP1R35_AAA_FIP	NP_115544.1	WDR75	4|0|0|0|0|0|0|2|6|5|0|2	2|5|3|0	10	2.5	0	0.45	0.87
FlagBirA-PPP1R35_AAA_FIP	NP_817092.1	PPM1G	20|18|0|0|0|0|28|27|20|19|12|16	20|26|8|13	67	16.75	0	0.61	0.93
FlagBirA-PPP1R35_AAA_FIP	NP_003899.2	EIF2S2	18|20|26|25|20|21|21|22|21|25|16|17	29|38|31|30	128	32	0	1.25	0.92
FlagBirA-PPP1R35_AAA_FIP	NP_115687.2	POLDIP3	0|3|2|0|0|0|6|4|5|6|3|3	10|11|4|6	31	7.75	0	1.29	0.79
FlagBirA-PPP1R35_AAA_FIP	NP_001177808.1	ORC4	7|7|4|0|0|0|6|6|6|8|5|4	7|12|12|7	38	9.5	0	1.27	0.83
FlagBirA-PPP1R35_AAA_FIP	NP_001177893.1	ZMYM2	0|0|0|0|0|0|0|0|0|0|0|0	11|10|3|5	29	7.25	0.99	72.5	0
FlagBirA-PPP1R35_AAA_FIP	NP_835461.1	ZNF598	0|2|0|0|0|0|8|7|8|7|3|4	9|11|7|10	37	9.25	0	1.16	0.86
FlagBirA-PPP1R35_AAA_FIP	NP_001177957.2	TNPO3	5|5|0|0|0|0|12|10|8|8|6|6	8|11|0|0	19	4.75	0	0.43	0.9
FlagBirA-PPP1R35_AAA_FIP	NP_060205.3	TTC27	0|0|2|0|0|0|3|2|3|2|4|3	2|3|3|5	13	3.25	0	0.93	0.79
FlagBirA-PPP1R35_AAA_FIP	NP_665739.3	POGZ	3|0|0|0|0|0|4|2|2|4|0|0	17|21|5|6	49	12.25	0.5	3.06	0.23
FlagBirA-PPP1R35_AAA_FIP	NP_839955.1	EXOC1	0|3|0|0|0|0|0|2|0|4|0|0	2|5|0|0	7	1.75	0	0.5	0.79
FlagBirA-PPP1R35_AAA_FIP	NP_847896.1	ATG4B	3|6|0|0|0|0|6|3|6|7|3|2	4|6|6|4	20	5	0	0.77	0.87
FlagBirA-PPP1R35_AAA_FIP	NP_036359.2	GTPBP6	0|0|0|0|0|0|0|0|0|0|0|0	3|0|0|0	3	0.75	0.24	7.5	0.48
FlagBirA-PPP1R35_AAA_FIP	NP_064710.4	C16orf62	0|0|0|0|0|0|7|6|4|2|0|0	4|5|0|0	9	2.25	0	0.35	0.88
FlagBirA-PPP1R35_AAA_FIP	NP_001182220.1	SERPINB6	5|4|0|0|0|0|19|12|10|7|8|10	7|10|8|6	31	7.75	0	0.5	0.92
FlagBirA-PPP1R35_AAA_FIP	NP_849189.1	SFXN2	0|0|0|0|0|0|5|3|6|7|0|0	5|6|0|0	11	2.75	0	0.42	0.88
FlagBirA-PPP1R35_AAA_FIP	NP_006297.2	SMC1A	26|25|14|19|12|14|17|17|29|22|16|13	30|21|15|13	79	19.75	0	0.72	0.93
FlagBirA-PPP1R35_AAA_FIP	NP_001182356.1	SRSF2	0|0|13|12|7|7|2|3|6|5|0|0	4|7|0|0	11	2.75	0	0.22	0.92
FlagBirA-PPP1R35_AAA_FIP	NP_001182375.1	SRSF7	0|0|10|10|10|11|11|7|17|17|0|0	15|16|4|0	35	8.75	0	0.51	0.92
FlagBirA-PPP1R35_AAA_FIP	NP_001182537.1	PLEKHA1	0|0|0|0|0|0|0|0|0|0|0|0	3|2|0|2	7	1.75	0.63	17.5	0.12
FlagBirA-PPP1R35_AAA_FIP	NP_001184008.1	IFRD1	0|0|0|0|0|0|0|0|0|0|0|0	2|2|0|0	4	1	0.39	10	0.36
FlagBirA-PPP1R35_AAA_FIP	NP_001184188.1	ORC3	6|5|0|0|0|0|4|7|5|6|8|10	4|5|0|0	9	2.25	0	0.25	0.91
FlagBirA-PPP1R35_AAA_FIP	NP_001184259.1	POLE2	0|0|0|0|0|0|4|2|0|3|2|0	3|0|0|0	3	0.75	0	0.21	0.83
FlagBirA-PPP1R35_AAA_FIP	XP_003119578.1	LOC100507855	5|8|0|0|0|0|7|13|3|7|19|25	9|8|7|8	32	8	0	0.36	0.93
FlagBirA-PPP1R35_AAA_FIP	NP_001185918.1	NFS1	6|0|0|0|0|0|0|0|0|0|0|0	3|0|2|0	5	1.25	0	0.42	0.79
FlagBirA-PPP1R35_AAA_FIP	NP_001185986.1	RPS17	23|27|25|24|21|21|23|25|49|41|9|8	42|28|30|29	129	32.25	0	0.72	0.94
FlagBirA-PPP1R35_AAA_FIP	NP_001186084.1	KAT7	0|0|0|0|0|0|0|0|4|2|0|0	4|3|0|0	7	1.75	0	0.58	0.78
FlagBirA-PPP1R35_AAA_FIP	NP_001186190.1	UCHL5	11|12|0|0|0|0|15|15|12|16|12|10	11|10|7|6	34	8.5	0	0.55	0.92
FlagBirA-PPP1R35_AAA_FIP	NP_001186307.1	GBF1	6|8|0|0|0|0|12|10|10|12|8|7	6|6|2|0	14	3.5	0	0.29	0.94
FlagBirA-PPP1R35_AAA_FIP	NP_006245.2	PRKCD	2|0|0|0|0|0|0|0|5|2|0|0	4|4|0|2	10	2.5	0	0.71	0.8
FlagBirA-PPP1R35_AAA_FIP	NP_112574.3	ADPGK	7|5|0|0|0|0|12|5|3|6|5|3	3|0|0|4	7	1.75	0	0.18	0.91
FlagBirA-PPP1R35_AAA_FIP	NP_002147.2	HSPD1	181|174|54|50|55|56|179|152|79|82|166|205	139|109|119|117	484	121	0	0.63	0.94
FlagBirA-PPP1R35_AAA_FIP	NP_009185.2	PNKP	0|0|0|0|0|0|0|0|0|0|0|0	2|0|0|0	2	0.5	0.2	5	0.53
FlagBirA-PPP1R35_AAA_FIP	NP_003162.2	SUPV3L1	13|12|0|0|0|0|15|17|10|8|15|13	15|19|17|19	70	17.5	0	1.09	0.91
FlagBirA-PPP1R35_AAA_FIP	NP_001186797.1	GLRX3	9|10|9|8|12|11|24|20|14|17|13|17	19|14|8|8	49	12.25	0	0.56	0.93
FlagBirA-PPP1R35_AAA_FIP	NP_573566.2	LRPPRC	144|141|112|114|132|119|163|168|155|167|146|160	174|183|139|128	624	156	0	0.93	0.94
FlagBirA-PPP1R35_AAA_FIP	NP_115949.3	SMEK1	13|16|0|0|0|0|21|24|15|16|3|2	16|11|12|8	47	11.75	0	0.52	0.93
FlagBirA-PPP1R35_AAA_FIP	NP_036525.1	PFAS	80|86|2|7|8|4|82|102|85|78|80|81	73|85|60|74	292	73	0	0.78	0.94
FlagBirA-PPP1R35_AAA_FIP	NP_001922.2	DLAT	0|0|2|0|2|0|5|0|0|0|0|0	2|0|0|0	2	0.5	0	0.14	0.84
FlagBirA-PPP1R35_AAA_FIP	NP_112180.4	SNX27	8|7|5|7|3|3|8|4|6|9|13|12	13|13|5|12	43	10.75	0	0.86	0.9
FlagBirA-PPP1R35_AAA_FIP	NP_057030.3	PELO	6|6|9|7|9|9|6|12|20|13|7|6	20|24|14|9	67	16.75	0	1.02	0.9
FlagBirA-PPP1R35_AAA_FIP	NP_853551.1	RFC4	15|24|15|10|11|6|17|22|17|16|14|12	15|20|29|20	84	21	0	0.91	0.92
FlagBirA-PPP1R35_AAA_FIP	NP_037467.2	GMPPA	4|5|0|0|0|0|4|0|0|4|0|3	3|2|5|4	14	3.5	0	0.78	0.83
FlagBirA-PPP1R35_AAA_FIP	NP_612142.2	NUP35	0|3|0|0|0|0|3|2|0|0|5|2	4|5|4|3	16	4	0	1	0.81
FlagBirA-PPP1R35_AAA_FIP	NP_003892.2	SGPL1	0|0|0|0|0|0|5|6|0|2|3|0	11|7|0|4	22	5.5	0	1	0.77
FlagBirA-PPP1R35_AAA_FIP	NP_001188474.1	RBM15	0|0|0|0|0|0|5|3|3|3|3|0	4|6|0|0	10	2.5	0	0.62	0.79
FlagBirA-PPP1R35_AAA_FIP	NP_003901.2	BUD31	0|0|0|0|0|0|0|3|0|0|0|0	3|0|0|0	3	0.75	0.01	0.5	0.71
FlagBirA-PPP1R35_AAA_FIP	NP_061330.2	BAIAP2L1	0|0|0|0|0|0|3|0|0|0|0|0	3|2|2|0	7	1.75	0.01	1.17	0.69
FlagBirA-PPP1R35_AAA_FIP	NP_001677.2	ATP5B	38|34|186|181|191|194|48|58|74|58|27|29	52|46|43|56	197	49.25	0	0.26	0.94
FlagBirA-PPP1R35_AAA_FIP	NP_003583.2	CUL1	18|26|7|7|5|6|48|35|36|36|12|18	36|35|18|12	101	25.25	0	0.6	0.94
FlagBirA-PPP1R35_AAA_FIP	NP_001226.2	SERPINH1	11|12|0|0|0|3|7|7|2|0|9|12	3|3|3|5	14	3.5	0	0.29	0.94
FlagBirA-PPP1R35_AAA_FIP	NP_006383.2	NOP56	0|0|0|0|0|0|3|0|4|4|0|0	11|21|14|15	61	15.25	0.75	3.81	0.05
FlagBirA-PPP1R35_AAA_FIP	NP_003655.3	AP3B1	11|11|0|0|0|0|16|12|10|7|6|7	33|32|25|23	113	28.25	0	2.02	0.75
FlagBirA-PPP1R35_AAA_FIP	NP_036439.2	EPB41L3	0|0|0|0|0|0|0|2|5|4|0|0	5|10|3|2	20	5	0	1.11	0.73
FlagBirA-PPP1R35_AAA_FIP	NP_113619.2	COG3	0|0|0|0|0|0|9|7|3|0|2|0	3|4|0|0	7	1.75	0	0.22	0.9
FlagBirA-PPP1R35_AAA_FIP	NP_002904.3	RFC1	4|4|0|0|0|0|0|0|6|2|0|0	11|10|5|7	33	8.25	0	1.65	0.73
FlagBirA-PPP1R35_AAA_FIP	NP_001191455.1	SSR4	4|3|11|8|8|8|13|10|7|18|12|12	9|6|7|10	32	8	0	0.52	0.92
FlagBirA-PPP1R35_AAA_FIP	NP_038476.2	BAZ1A	0|0|0|0|0|0|0|0|4|3|0|0	4|7|0|4	15	3.75	0	1.07	0.74
FlagBirA-PPP1R35_AAA_FIP	NP_872578.1	MRPS9	0|3|0|0|0|0|3|0|3|5|0|4	8|5|2|0	15	3.75	0	0.83	0.78
FlagBirA-PPP1R35_AAA_FIP	NP_003742.2	EIF3B	23|22|16|13|13|10|13|15|20|15|8|11	19|31|16|15	81	20.25	0	0.9	0.92
FlagBirA-PPP1R35_AAA_FIP	NP_872590.1	PCNA	73|59|45|50|45|41|61|72|64|54|55|57	62|44|63|69	238	59.5	0	0.82	0.94
FlagBirA-PPP1R35_AAA_FIP	NP_060341.2	CPSF3L	2|0|0|0|0|0|3|3|4|3|2|3	2|2|0|0	4	1	0	0.29	0.84
FlagBirA-PPP1R35_AAA_FIP	NP_001193962.1	RNF40	0|3|0|0|0|0|3|2|7|3|2|5	5|5|0|4	14	3.5	0	0.58	0.87
FlagBirA-PPP1R35_AAA_FIP	NP_001367.2	DYNC1H1	208|205|207|203|233|226|261|237|206|224|153|150	176|181|145|151	653	163.25	0	0.66	0.94
FlagBirA-PPP1R35_AAA_FIP	NP_004672.2	EIF1AY	11|8|0|0|0|0|7|4|9|8|4|5	22|16|5|5	48	12	0	1.2	0.78
FlagBirA-PPP1R35_AAA_FIP	NP_002476.2	NBN	0|0|0|0|0|0|0|3|2|3|3|0	3|6|4|0	13	3.25	0	1.08	0.74
FlagBirA-PPP1R35_AAA_FIP	NP_004517.2	MCM2	0|4|0|0|0|0|3|4|4|6|5|8	7|5|2|0	14	3.5	0	0.5	0.88
FlagBirA-PPP1R35_AAA_FIP	NP_001975.1	ESD	11|13|0|0|0|0|23|18|22|21|2|5	24|25|13|14	76	19	0	0.84	0.92
FlagBirA-PPP1R35_AAA_FIP	NP_878256.1	RABGGTA	4|9|0|0|0|0|10|10|9|8|5|10	10|7|4|5	26	6.5	0	0.65	0.9
FlagBirA-PPP1R35_AAA_FIP	NP_000703.2	BLVRA	36|35|0|0|0|0|30|41|28|23|33|35	23|29|21|24	97	24.25	0	0.63	0.93
FlagBirA-PPP1R35_AAA_FIP	NP_877963.1	PLCG1	3|2|0|0|0|0|3|5|2|2|6|7	12|18|4|3	37	9.25	0.07	1.42	0.63
FlagBirA-PPP1R35_AAA_FIP	NP_001229528.1	RBM39	24|26|16|17|17|17|30|34|30|30|21|21	47|35|45|35	162	40.5	0	1.27	0.92
FlagBirA-PPP1R35_AAA_FIP	NP_006342.2	TIMM44	18|23|13|15|13|14|37|25|19|23|32|42	26|27|28|27	108	27	0	0.68	0.94
FlagBirA-PPP1R35_AAA_FIP	NP_001229852.1	EIF3L	21|17|14|16|8|9|13|17|14|15|3|0	18|20|16|12	66	16.5	0	0.87	0.92
FlagBirA-PPP1R35_AAA_FIP	NP_079106.3	LPCAT1	15|6|7|7|7|12|9|12|10|10|6|10	12|9|9|10	40	10	0	0.74	0.91
FlagBirA-PPP1R35_AAA_FIP	NP_005076.3	NUP214	0|0|0|0|0|0|5|5|3|9|4|4	12|8|5|2	27	6.75	0	0.96	0.82
FlagBirA-PPP1R35_AAA_FIP	NP_057191.2	ZFR	5|4|0|0|0|0|10|11|12|13|0|2	16|15|4|13	48	12	0	0.96	0.9
FlagBirA-PPP1R35_AAA_FIP	NP_059133.1	CPSF2	8|4|0|0|0|0|8|11|15|11|2|0	20|20|0|3	43	10.75	0	0.83	0.89
FlagBirA-PPP1R35_AAA_FIP	NP_004628.4	RAB7A	26|23|16|15|15|16|34|29|45|46|31|29	38|32|18|22	110	27.5	0	0.6	0.94
FlagBirA-PPP1R35_AAA_FIP	NP_064632.2	ADCK3	19|22|11|12|12|14|12|14|8|9|23|23	14|13|10|14	51	12.75	0	0.55	0.94
FlagBirA-PPP1R35_AAA_FIP	NP_003312.3	TUFM	54|52|58|64|73|72|38|43|48|48|39|51	56|49|48|57	210	52.5	0	0.72	0.94
FlagBirA-PPP1R35_AAA_FIP	NP_076962.2	NUP37	10|8|0|0|0|0|9|9|7|15|14|14	10|9|5|8	32	8	0	0.55	0.92
FlagBirA-PPP1R35_AAA_FIP	NP_892029.2	TRMT2A	6|9|0|4|0|3|8|4|6|7|0|0	7|9|4|10	30	7.5	0	0.88	0.88
FlagBirA-PPP1R35_AAA_FIP	NP_001230154.1	PES1	0|0|0|0|0|0|2|0|2|2|0|4	4|5|2|0	11	2.75	0	0.92	0.76
FlagBirA-PPP1R35_AAA_FIP	NP_004635.2	AP3B2	0|0|6|10|7|6|0|0|0|0|0|0	6|21|3|0	30	7.5	0.01	0.88	0.71
FlagBirA-PPP1R35_AAA_FIP	NP_057361.3	RAB23	4|4|0|0|0|0|5|7|7|6|5|0	3|6|0|0	9	2.25	0	0.32	0.88
FlagBirA-PPP1R35_AAA_FIP	NP_002258.2	KPNA3	15|15|0|0|0|0|18|20|23|17|15|14	17|19|10|15	61	15.25	0	0.71	0.93
FlagBirA-PPP1R35_AAA_FIP	NP_001117.2	ADSS	48|37|22|22|22|25|62|56|43|42|38|46	32|28|42|39	141	35.25	0	0.6	0.94
FlagBirA-PPP1R35_AAA_FIP	NP_005460.2	ACOT8	6|3|0|0|0|0|0|0|0|3|0|5	3|0|0|2	5	1.25	0	0.23	0.88
FlagBirA-PPP1R35_AAA_FIP	NP_919223.1	HNRNPA3	0|0|10|12|8|8|0|0|6|3|0|0	4|5|0|0	9	2.25	0	0.2	0.92
FlagBirA-PPP1R35_AAA_FIP	NP_874365.3	SCRIB	7|0|0|7|2|8|11|12|14|11|11|38	22|17|18|9	66	16.5	0	0.63	0.93
FlagBirA-PPP1R35_AAA_FIP	NP_001243125.1	ARAF	3|0|0|0|0|2|0|0|0|0|3|3	4|2|5|3	14	3.5	0	1.17	0.76
FlagBirA-PPP1R35_AAA_FIP	NP_001243211.1	KRT8	16|16|17|15|20|22|18|21|22|29|6|7	40|34|41|38	153	38.25	0	1.5	0.91
FlagBirA-PPP1R35_AAA_FIP	NP_001243239.1	GLS	12|14|10|13|7|12|21|18|16|19|18|22	16|15|12|12	55	13.75	0	0.64	0.93
FlagBirA-PPP1R35_AAA_FIP	NP_932164.1	HIBCH	3|6|0|0|0|0|6|5|2|4|10|11	3|3|0|6	12	3	0	0.29	0.91
FlagBirA-PPP1R35_AAA_FIP	NP_932332.1	GNPNAT1	7|4|0|0|0|0|10|9|6|8|7|4	8|7|6|10	31	7.75	0	0.82	0.89
FlagBirA-PPP1R35_AAA_FIP	NP_001243755.1	PAF1	2|0|0|0|0|0|0|4|5|3|3|4	5|6|9|9	29	7.25	0	1.61	0.75
FlagBirA-PPP1R35_AAA_FIP	NP_001243820.1	SRI	3|6|0|0|0|0|8|3|0|0|2|0	3|4|2|0	9	2.25	0	0.32	0.89
FlagBirA-PPP1R35_AAA_FIP	NP_056289.2	SAMHD1	9|16|5|7|6|6|11|9|20|23|15|12	24|24|18|26	92	23	0	1.07	0.92
FlagBirA-PPP1R35_AAA_FIP	NP_937832.1	COPS8	3|2|0|0|0|0|6|3|0|0|0|3	4|2|0|0	6	1.5	0	0.33	0.85
FlagBirA-PPP1R35_AAA_FIP	NP_060082.2	ZCCHC8	0|0|0|0|0|0|0|2|0|0|0|0	5|5|0|4	14	3.5	0.25	3.5	0.48
FlagBirA-PPP1R35_AAA_FIP	NP_004883.3	SEC22B	9|8|9|8|10|8|8|10|15|15|10|15	8|12|9|9	38	9.5	0	0.63	0.92
FlagBirA-PPP1R35_AAA_FIP	NP_001244222.1	HNRNPH1	70|62|54|58|51|58|90|91|79|93|76|83	134|122|113|138	507	126.75	0	1.38	0.94
FlagBirA-PPP1R35_AAA_FIP	NP_006355.2	SEC23A	13|11|4|4|0|0|12|13|13|12|16|15	17|21|16|14	68	17	0	1.1	0.9
FlagBirA-PPP1R35_AAA_FIP	NP_689508.3	TARS	90|75|6|11|5|9|98|99|75|88|70|75	67|62|82|71	282	70.5	0	0.72	0.94
FlagBirA-PPP1R35_AAA_FIP	NP_938148.1	GANAB	14|11|2|0|0|0|12|6|4|4|16|18	6|6|7|7	26	6.5	0	0.38	0.94
FlagBirA-PPP1R35_AAA_FIP	NP_002145.3	HSPA4	2|0|0|0|0|0|0|2|0|0|0|0	2|4|4|4	14	3.5	0.01	1.75	0.69
FlagBirA-PPP1R35_AAA_FIP	NP_006764.3	DDX18	0|0|0|2|2|3|0|0|2|0|0|0	5|6|0|0	11	2.75	0.01	1.1	0.69
FlagBirA-PPP1R35_AAA_FIP	NP_001719.2	BSG	11|9|26|29|34|34|19|19|26|25|13|12	8|4|8|7	27	6.75	0	0.2	0.94
FlagBirA-PPP1R35_AAA_FIP	NP_004913.2	SEC24C	32|36|0|0|2|0|44|49|48|47|26|26	36|52|34|23	145	36.25	0	0.75	0.94
FlagBirA-PPP1R35_AAA_FIP	NP_001244919.1	FBXO7	0|0|0|0|0|0|4|6|3|4|4|7	5|6|4|0	15	3.75	0	0.58	0.88
FlagBirA-PPP1R35_AAA_FIP	NP_006388.2	RNASEH2A	13|10|0|0|0|0|21|15|8|12|5|6	16|11|11|9	47	11.75	0	0.65	0.92
FlagBirA-PPP1R35_AAA_FIP	NP_006582.1	POLD3	3|0|2|0|3|0|0|0|0|0|0|2	5|9|0|0	14	3.5	0.07	1.17	0.63
FlagBirA-PPP1R35_AAA_FIP	NP_115545.3	ACAD11	5|5|0|0|0|0|3|5|6|2|0|0	5|0|3|0	8	2	0	0.36	0.87
FlagBirA-PPP1R35_AAA_FIP	NP_061895.3	TMX3	8|9|5|9|9|9|15|15|0|5|30|28	4|4|0|0	8	2	0	0.07	0.94
FlagBirA-PPP1R35_AAA_FIP	NP_001245237.1	NOP2	0|0|10|10|7|6|2|4|7|6|0|0	6|10|0|3	19	4.75	0	0.47	0.9
FlagBirA-PPP1R35_AAA_FIP	NP_003631.2	IKBKAP	10|15|2|0|0|0|12|11|16|16|17|14	17|21|12|14	64	16	0	0.97	0.91
FlagBirA-PPP1R35_AAA_FIP	NP_065796.1	AARS2	29|32|8|6|11|7|54|41|29|32|25|32	48|35|25|20	128	32	0	0.67	0.94
FlagBirA-PPP1R35_AAA_FIP	NP_001087.2	ACLY	170|160|0|0|0|0|153|157|186|178|195|203	202|187|183|170	742	185.5	0	0.93	0.94
FlagBirA-PPP1R35_AAA_FIP	NP_006360.3	LRRC41	5|4|0|0|0|0|11|12|10|8|0|5	3|13|4|2	22	5.5	0	0.48	0.9
FlagBirA-PPP1R35_AAA_FIP	NP_008941.2	DDX52	0|0|0|0|3|2|0|0|0|0|0|0	8|11|10|5	34	8.5	0.53	3.4	0.15
FlagBirA-PPP1R35_AAA_FIP	NP_060200.2	QRICH1	8|7|0|0|0|0|10|10|5|4|7|8	6|10|3|3	22	5.5	0	0.55	0.9
FlagBirA-PPP1R35_AAA_FIP	NP_689942.2	NT5DC1	18|14|0|0|0|0|27|25|26|15|24|19	26|24|13|13	76	19	0	0.72	0.93
FlagBirA-PPP1R35_AAA_FIP	NP_942600.1	FIBP	0|0|0|0|0|0|3|4|0|0|0|2	2|3|0|0	5	1.25	0	0.36	0.83
FlagBirA-PPP1R35_AAA_FIP	NP_060422.4	PTCD3	5|5|0|3|0|0|8|4|4|5|5|4	18|18|7|9	52	13	0.15	2	0.6
FlagBirA-PPP1R35_AAA_FIP	NP_001248341.1	DCTN2	24|28|34|26|31|33|36|34|30|36|26|21	28|30|18|18	94	23.5	0	0.65	0.93
FlagBirA-PPP1R35_AAA_FIP	NP_001248753.1	PSMG1	15|11|8|6|8|8|14|7|12|12|10|8	8|10|16|15	49	12.25	0	0.84	0.91
FlagBirA-PPP1R35_AAA_FIP	NP_055506.1	AQR	4|4|0|0|0|0|11|8|8|6|0|4	15|9|0|0	24	6	0	0.63	0.86
FlagBirA-PPP1R35_AAA_FIP	NP_055427.2	FAM120A	0|0|2|0|0|0|2|0|6|0|2|3	7|6|6|4	23	5.75	0	1.28	0.79
FlagBirA-PPP1R35_AAA_FIP	NP_008986.2	POLR3A	6|2|0|2|4|0|6|5|6|8|5|4	23|23|7|7	60	15	0.49	2.14	0.29
FlagBirA-PPP1R35_AAA_FIP	NP_945314.1	DHX57	0|0|0|0|0|0|0|0|0|0|0|0	10|9|15|8	42	10.5	1	105	0
FlagBirA-PPP1R35_AAA_FIP	NP_060440.2	C14orf102	0|0|0|0|0|0|8|4|6|4|0|2	5|8|0|0	13	3.25	0	0.46	0.87
FlagBirA-PPP1R35_AAA_FIP	NP_075391.3	INTS3	4|5|0|0|0|0|10|5|8|4|0|9	9|6|3|3	21	5.25	0	0.55	0.9
FlagBirA-PPP1R35_AAA_FIP	NP_004499.2	IDI1	11|10|0|0|0|0|17|13|6|4|6|5	7|7|3|0	17	4.25	0	0.28	0.92
FlagBirA-PPP1R35_AAA_FIP	NP_078805.3	CDC73	17|14|0|0|2|0|24|30|30|23|20|17	25|27|23|25	100	25	0	0.83	0.93
FlagBirA-PPP1R35_AAA_FIP	NP_002622.2	PGD	46|41|0|0|0|0|50|52|38|38|42|50	31|29|43|31	134	33.5	0	0.66	0.94
FlagBirA-PPP1R35_AAA_FIP	NP_001257889.1	NOSIP	0|0|4|5|5|3|0|0|0|0|5|4	6|5|2|0	13	3.25	0	0.65	0.84
FlagBirA-PPP1R35_AAA_FIP	NP_001257904.1	IST1	0|0|0|0|0|0|0|6|0|2|2|0	2|0|0|0	2	0.5	0	0.12	0.86
FlagBirA-PPP1R35_AAA_FIP	NP_078930.3	NOL9	0|0|0|0|0|0|0|0|3|3|0|2	23|23|18|22	86	21.5	1	7.17	0
FlagBirA-PPP1R35_AAA_FIP	NP_054733.2	SNRNP200	66|54|94|97|85|87|68|66|69|74|27|38	110|105|57|62	334	83.5	0	0.87	0.94
FlagBirA-PPP1R35_AAA_FIP	NP_003469.2	CUL5	16|16|2|0|0|0|5|11|5|5|8|9	10|13|6|9	38	9.5	0	0.59	0.92
FlagBirA-PPP1R35_AAA_FIP	NP_060979.2	LRRC59	8|5|19|21|28|20|13|9|4|7|12|10	6|10|12|15	43	10.75	0	0.44	0.93
FlagBirA-PPP1R35_AAA_FIP	NP_954592.1	CARM1	5|8|3|3|0|0|10|11|6|11|10|6	12|12|4|7	35	8.75	0	0.8	0.9
FlagBirA-PPP1R35_AAA_FIP	NP_060245.3	TTC19	2|2|0|0|0|0|4|5|3|0|0|2	8|4|0|0	12	3	0	0.67	0.78
FlagBirA-PPP1R35_AAA_FIP	NP_060592.2	DARS2	45|42|2|0|0|0|43|36|25|31|28|36	33|34|42|29	138	34.5	0	0.78	0.93
FlagBirA-PPP1R35_AAA_FIP	NP_071439.3	DUS1L	0|0|0|0|0|0|2|0|2|0|0|0	2|0|0|0	2	0.5	0	0.25	0.77
FlagBirA-PPP1R35_AAA_FIP	NP_003585.3	TTF2	0|0|0|0|0|0|4|2|0|4|0|2	6|3|3|0	12	3	0	0.75	0.79
FlagBirA-PPP1R35_AAA_FIP	NP_036601.2	PRPF6	10|15|8|7|12|6|11|8|14|9|8|8	16|20|11|14	61	15.25	0	1.05	0.9
FlagBirA-PPP1R35_AAA_FIP	NP_055535.2	SLK	10|11|0|0|0|0|10|8|5|6|3|4	8|9|5|4	26	6.5	0	0.62	0.9
FlagBirA-PPP1R35_AAA_FIP	NP_891552.1	HEATR3	8|4|0|0|0|0|12|7|10|6|9|7	2|8|7|8	25	6.25	0	0.57	0.91
FlagBirA-PPP1R35_AAA_FIP	NP_291028.3	TP53RK	0|2|0|0|0|0|5|5|0|3|0|0	4|4|0|3	11	2.75	0	0.55	0.86
FlagBirA-PPP1R35_AAA_FIP	NP_958434.1	CNN2	0|0|0|0|0|0|0|3|3|4|0|0	2|0|0|0	2	0.5	0	0.14	0.85
FlagBirA-PPP1R35_AAA_FIP	NP_003680.2	AKR7A2	0|0|0|0|0|0|3|0|2|4|0|0	2|3|0|0	5	1.25	0	0.36	0.83
FlagBirA-PPP1R35_AAA_FIP	NP_004809.2	DDX23	8|3|8|7|15|14|3|5|5|5|3|5	12|10|5|5	32	8	0	0.55	0.92
FlagBirA-PPP1R35_AAA_FIP	NP_055644.2	DDX46	24|34|17|14|18|15|31|25|33|35|17|17	45|37|23|27	132	33	0	0.96	0.93
FlagBirA-PPP1R35_AAA_FIP	NP_000938.2	PRIM2	19|17|0|0|0|0|24|22|18|19|15|15	14|21|29|26	90	22.5	0	0.98	0.92
FlagBirA-PPP1R35_AAA_FIP	NP_061982.3	ALG1	0|0|0|0|0|0|2|0|4|6|0|0	3|3|4|3	13	3.25	0	0.65	0.86
FlagBirA-PPP1R35_AAA_FIP	NP_005984.3	TBCD	14|18|0|0|0|0|17|17|8|14|21|20	7|15|3|4	29	7.25	0	0.35	0.93
FlagBirA-PPP1R35_AAA_FIP	NP_004095.4	FASN	672|627|732|712|712|715|493|506|576|558|540|567	550|485|603|555	2193	548.25	0	0.76	0.94
FlagBirA-PPP1R35_AAA_FIP	NP_060206.2	THUMPD1	0|0|0|0|0|0|4|3|0|0|0|0	3|3|2|0	8	2	0	0.57	0.82
FlagBirA-PPP1R35_AAA_FIP	NP_005830.2	SRRM1	0|0|7|7|4|6|0|0|0|7|0|0	5|8|0|4	17	4.25	0	0.61	0.87
FlagBirA-PPP1R35_AAA_FIP	NP_005751.2	CEBPZ	0|0|0|0|0|0|0|0|0|0|0|0	2|6|3|0	11	2.75	0.69	27.5	0.1
FlagBirA-PPP1R35_AAA_FIP	NP_057019.3	METTL13	0|0|0|0|0|0|4|2|0|3|3|0	3|0|0|2	5	1.25	0	0.36	0.83
FlagBirA-PPP1R35_AAA_FIP	NP_006635.2	HSPH1	0|0|0|0|0|0|0|0|0|0|0|3	4|4|10|5	23	5.75	0.26	3.83	0.41
FlagBirA-PPP1R35_AAA_FIP	NP_976035.1	POLR1C	11|9|9|11|7|9|13|15|15|14|11|12	13|13|12|16	54	13.5	0	0.9	0.91
FlagBirA-PPP1R35_AAA_FIP	NP_060738.2	WDR41	5|0|5|7|5|3|0|6|9|9|2|2	9|5|4|5	23	5.75	0	0.64	0.89
FlagBirA-PPP1R35_AAA_FIP	NP_055860.1	WAPAL	4|4|0|0|0|0|8|3|6|6|0|3	7|6|4|6	23	5.75	0	0.82	0.88
FlagBirA-PPP1R35_AAA_FIP	NP_004448.2	ACSL3	21|16|11|11|11|9|26|25|29|26|13|18	24|27|20|15	86	21.5	0	0.78	0.93
FlagBirA-PPP1R35_AAA_FIP	NP_003650.1	AGPS	41|34|0|0|0|0|44|45|33|36|45|46	24|27|24|29	104	26	0	0.57	0.94
FlagBirA-PPP1R35_AAA_FIP	NP_001144.1	ANXA4	9|5|0|0|0|0|15|12|2|5|8|9	8|7|0|3	18	4.5	0	0.33	0.92
FlagBirA-PPP1R35_AAA_FIP	NP_001649.1	ARF1	23|19|21|20|18|17|29|25|35|28|33|33	23|24|19|20	86	21.5	0	0.63	0.94
FlagBirA-PPP1R35_AAA_FIP	NP_001651.1	ARF4	8|10|9|12|9|11|10|11|15|17|17|13	12|13|9|12	46	11.5	0	0.68	0.92
FlagBirA-PPP1R35_AAA_FIP	NP_001168.1	ARL1	11|10|16|14|14|12|39|20|26|12|15|14	14|15|16|16	61	15.25	0	0.47	0.94
FlagBirA-PPP1R35_AAA_FIP	NP_001688.1	ATP5O	3|3|16|15|17|20|5|6|8|8|6|7	4|6|10|9	29	7.25	0	0.39	0.93
FlagBirA-PPP1R35_AAA_FIP	NP_001203.1	C1QBP	17|16|36|31|28|26|26|19|18|23|34|31	247|194|631|680	1752	438	1	12.51	0
FlagBirA-PPP1R35_AAA_FIP	NP_001748.1	CBR1	49|45|0|0|0|0|44|51|49|37|35|36	40|37|33|32	142	35.5	0	0.71	0.94
FlagBirA-PPP1R35_AAA_FIP	NP_001227.1	CBR3	4|5|0|0|0|0|13|11|4|4|5|2	7|6|7|6	26	6.5	0	0.54	0.91
FlagBirA-PPP1R35_AAA_FIP	NP_001275.1	AP3S1	9|8|14|13|12|11|14|14|12|12|18|17	9|11|9|12	41	10.25	0	0.59	0.94
FlagBirA-PPP1R35_AAA_FIP	NP_001312.1	CSRP2	0|0|0|0|0|0|2|0|0|0|0|0	5|4|3|2	14	3.5	0.19	3.5	0.6
FlagBirA-PPP1R35_AAA_FIP	NP_001335.1	DAD1	0|4|0|0|4|0|4|5|4|7|0|0	3|2|0|0	5	1.25	0	0.21	0.89
FlagBirA-PPP1R35_AAA_FIP	NP_003850.1	DPM1	9|7|18|10|24|17|9|11|16|13|11|10	20|19|10|17	66	16.5	0	0.79	0.92
FlagBirA-PPP1R35_AAA_FIP	NP_001395.1	EEF1G	123|121|90|80|69|63|107|111|93|94|92|89	98|105|109|119	431	107.75	0	0.88	0.94
FlagBirA-PPP1R35_AAA_FIP	NP_001952.1	EEF2	93|75|45|51|44|42|107|98|80|61|125|140	70|72|71|60	273	68.25	0	0.52	0.94
FlagBirA-PPP1R35_AAA_FIP	NP_001406.1	EIF2S3	26|27|20|18|20|23|23|25|18|21|20|23	29|17|22|18	86	21.5	0	0.81	0.93
FlagBirA-PPP1R35_AAA_FIP	NP_003741.1	EIF3A	31|30|19|18|19|17|31|21|31|30|17|19	26|32|28|29	115	28.75	0	0.93	0.93
FlagBirA-PPP1R35_AAA_FIP	NP_003748.1	EIF3I	12|10|15|12|9|9|10|5|12|11|5|4	13|12|11|12	48	12	0	0.89	0.91
FlagBirA-PPP1R35_AAA_FIP	NP_003747.1	EIF3H	0|2|0|0|3|0|8|2|6|4|0|0	5|6|0|0	11	2.75	0	0.39	0.88
FlagBirA-PPP1R35_AAA_FIP	NP_003745.1	EIF3F	16|12|8|6|5|6|12|14|13|12|13|14	11|12|12|4	39	9.75	0	0.65	0.92
FlagBirA-PPP1R35_AAA_FIP	NP_001559.1	EIF3E	18|18|14|17|14|12|13|19|16|21|8|10	26|17|30|20	93	23.25	0	1.16	0.91
FlagBirA-PPP1R35_AAA_FIP	NP_003744.1	EIF3D	6|8|4|5|6|4|3|3|4|5|0|0	10|13|5|9	37	9.25	0	1.32	0.81
FlagBirA-PPP1R35_AAA_FIP	NP_001972.1	EPS15	0|0|0|0|0|0|0|0|2|0|0|0	2|0|0|0	2	0.5	0.01	0.5	0.7
FlagBirA-PPP1R35_AAA_FIP	NP_001976.1	ETFB	8|9|0|0|0|0|7|5|3|7|8|12	5|3|8|12	28	7	0	0.67	0.89
FlagBirA-PPP1R35_AAA_FIP	NP_002005.1	FKBP4	106|93|54|48|40|48|90|94|90|85|68|92	110|98|98|99	405	101.25	0	1.01	0.94
FlagBirA-PPP1R35_AAA_FIP	NP_001460.1	XRCC6	66|70|51|47|50|44|106|96|123|113|33|36	125|118|58|56	357	89.25	0	0.76	0.94
FlagBirA-PPP1R35_AAA_FIP	NP_000145.1	GALK1	17|21|19|17|18|17|18|19|11|19|25|18	16|21|8|10	55	13.75	0	0.6	0.93
FlagBirA-PPP1R35_AAA_FIP	NP_003866.1	GMPS	63|73|28|31|37|31|101|108|82|87|75|80	92|101|61|48	302	75.5	0	0.72	0.94
FlagBirA-PPP1R35_AAA_FIP	NP_000170.1	MSH6	46|42|9|8|5|0|42|42|33|39|27|30	44|47|42|38	171	42.75	0	0.97	0.93
FlagBirA-PPP1R35_AAA_FIP	NP_001505.1	GTF2B	13|13|17|17|14|13|26|27|20|14|10|10	13|18|24|24	79	19.75	0	0.75	0.93
FlagBirA-PPP1R35_AAA_FIP	NP_000174.1	HADHB	16|14|3|0|4|2|14|19|22|24|24|14	27|28|24|22	101	25.25	0	1.05	0.92
FlagBirA-PPP1R35_AAA_FIP	NP_003633.1	HAT1	5|7|0|0|0|0|11|6|13|14|7|7	7|10|13|13	43	10.75	0	0.8	0.91
FlagBirA-PPP1R35_AAA_FIP	NP_000185.1	HPRT1	27|20|15|13|13|15|25|24|20|22|17|23	11|13|23|22	69	17.25	0	0.66	0.93
FlagBirA-PPP1R35_AAA_FIP	NP_001530.1	DNAJA1	20|16|35|37|19|28|39|47|34|25|37|44	19|20|13|7	59	14.75	0	0.32	0.94
FlagBirA-PPP1R35_AAA_FIP	NP_003595.1	IRS4	80|79|91|93|100|93|73|76|66|72|34|35	99|104|62|62	327	81.75	0	0.85	0.94
FlagBirA-PPP1R35_AAA_FIP	NP_002257.1	KPNA2	30|26|13|12|8|5|37|49|34|41|34|27	15|10|18|30	73	18.25	0	0.41	0.94
FlagBirA-PPP1R35_AAA_FIP	NP_002349.1	MAD2L1	3|4|8|5|4|6|4|5|4|3|2|2	5|2|6|4	17	4.25	0	0.61	0.88
FlagBirA-PPP1R35_AAA_FIP	NP_003917.1	MBD3	0|0|0|2|0|0|5|5|5|7|0|3	4|8|5|6	23	5.75	0	0.96	0.84
FlagBirA-PPP1R35_AAA_FIP	NP_002426.1	MPI	12|11|0|0|0|0|8|10|4|3|6|8	2|5|6|4	17	4.25	0	0.37	0.92
FlagBirA-PPP1R35_AAA_FIP	NP_002433.1	MSI1	3|5|4|3|0|0|6|6|8|6|4|0	11|18|5|7	41	10.25	0.02	1.46	0.68
FlagBirA-PPP1R35_AAA_FIP	NP_002477.1	NCBP1	12|14|6|4|2|3|25|29|29|21|15|12	16|17|7|6	46	11.5	0	0.4	0.93
FlagBirA-PPP1R35_AAA_FIP	NP_002487.1	NDUFS8	0|4|7|10|0|0|6|5|2|4|5|2	5|5|5|9	24	6	0	0.71	0.89
FlagBirA-PPP1R35_AAA_FIP	NP_003706.1	USO1	15|19|3|4|0|2|18|22|18|22|16|11	16|18|8|6	48	12	0	0.55	0.93
FlagBirA-PPP1R35_AAA_FIP	NP_002625.1	PHB	3|2|24|22|17|17|0|3|16|17|3|3	7|4|3|8	22	5.5	0	0.24	0.94
FlagBirA-PPP1R35_AAA_FIP	NP_002626.1	SLC25A3	7|9|33|27|34|28|7|7|24|25|2|4	21|20|11|12	64	16	0	0.48	0.93
FlagBirA-PPP1R35_AAA_FIP	NP_002676.1	EXOSC10	21|17|2|0|0|0|19|10|15|15|17|15	34|30|12|15	91	22.75	0	1.14	0.9
FlagBirA-PPP1R35_AAA_FIP	NP_000928.1	POLR2A	5|4|0|0|0|0|8|8|5|0|2|5	14|13|9|9	45	11.25	0	1.41	0.83
FlagBirA-PPP1R35_AAA_FIP	NP_000929.1	POLR2B	13|13|5|3|4|3|13|14|19|20|16|14	31|25|25|30	111	27.75	0	1.42	0.9
FlagBirA-PPP1R35_AAA_FIP	NP_002706.1	PPP2CA	7|15|10|12|9|8|14|14|9|14|8|11	13|8|12|12	45	11.25	0	0.78	0.91
FlagBirA-PPP1R35_AAA_FIP	NP_002711.1	PPP4C	0|0|0|0|0|0|0|2|4|7|0|0	3|2|2|0	7	1.75	0	0.32	0.88
FlagBirA-PPP1R35_AAA_FIP	NP_002818.1	PTPN1	10|12|13|9|16|10|12|15|13|12|8|5	9|7|11|6	33	8.25	0	0.53	0.94
FlagBirA-PPP1R35_AAA_FIP	NP_002824.1	PTPN9	4|6|0|3|0|2|4|6|7|6|0|4	7|9|7|5	28	7	0	1.08	0.85
FlagBirA-PPP1R35_AAA_FIP	NP_000308.1	PTS	0|0|17|17|12|13|0|0|5|4|0|0	5|5|4|6	20	5	0	0.29	0.93
FlagBirA-PPP1R35_AAA_FIP	NP_003601.1	RAE1	15|14|0|0|0|0|13|4|11|11|5|7	7|13|4|9	33	8.25	0	0.57	0.91
FlagBirA-PPP1R35_AAA_FIP	NP_002873.1	RANBP1	17|15|6|6|6|7|17|12|9|6|13|15	13|11|33|21	78	19.5	0	1.15	0.87
FlagBirA-PPP1R35_AAA_FIP	NP_002874.1	RANGAP1	41|37|35|32|35|33|54|43|38|43|51|56	41|35|35|41	152	38	0	0.69	0.94
FlagBirA-PPP1R35_AAA_FIP	NP_002892.1	RCN1	22|17|14|21|8|7|24|26|19|17|12|16	33|26|21|20	100	25	0	1	0.92
FlagBirA-PPP1R35_AAA_FIP	NP_002893.1	RCN2	22|23|35|41|32|32|29|37|32|22|15|18	53|56|59|45	213	53.25	0	1.37	0.93
FlagBirA-PPP1R35_AAA_FIP	NP_000967.1	RPL12	45|40|26|27|31|33|31|42|27|30|46|47	26|32|31|51	140	35	0	0.75	0.93
FlagBirA-PPP1R35_AAA_FIP	NP_000969.1	RPL23	38|46|11|9|8|10|28|15|23|23|21|19	46|28|23|25	122	30.5	0	0.73	0.93
FlagBirA-PPP1R35_AAA_FIP	NP_000974.1	RPL22	5|4|12|11|9|13|4|4|7|6|6|5	3|3|5|4	15	3.75	0	0.3	0.94
FlagBirA-PPP1R35_AAA_FIP	NP_000977.1	RPL24	10|14|23|22|24|22|10|13|12|11|11|8	15|14|29|24	82	20.5	0	0.87	0.92
FlagBirA-PPP1R35_AAA_FIP	NP_000978.1	RPL26	4|2|15|16|15|19|2|0|4|4|0|0	7|7|6|5	25	6.25	0	0.36	0.93
FlagBirA-PPP1R35_AAA_FIP	NP_000979.1	RPL27	10|7|33|26|26|30|7|6|6|7|7|7	11|9|10|13	43	10.75	0	0.34	0.94
FlagBirA-PPP1R35_AAA_FIP	NP_000981.1	RPL27A	4|5|10|12|10|10|4|5|5|5|5|4	7|6|12|13	38	9.5	0	0.86	0.9
FlagBirA-PPP1R35_AAA_FIP	NP_000980.1	RPL30	7|8|0|0|9|8|0|0|6|6|0|0	7|8|0|6	21	5.25	0	0.62	0.89
FlagBirA-PPP1R35_AAA_FIP	NP_000985.1	RPL32	0|0|11|12|10|9|0|0|3|3|2|0	4|5|6|6	21	5.25	0	0.46	0.91
FlagBirA-PPP1R35_AAA_FIP	NP_000990.1	RPL38	30|24|32|38|36|40|27|20|27|27|26|21	27|19|23|23	92	23	0	0.59	0.94
FlagBirA-PPP1R35_AAA_FIP	NP_000958.1	RPL3	6|5|45|47|42|46|14|12|8|14|2|4	26|24|16|20	86	21.5	0	0.46	0.94
FlagBirA-PPP1R35_AAA_FIP	NP_000963.1	RPL7A	13|12|44|42|40|41|14|13|19|19|9|9	25|25|32|30	112	28	0	0.65	0.94
FlagBirA-PPP1R35_AAA_FIP	NP_000995.1	RPLP2	11|11|42|49|47|52|18|14|17|19|10|12	23|22|15|15	75	18.75	0	0.37	0.94
FlagBirA-PPP1R35_AAA_FIP	NP_002941.1	RPN1	21|20|36|33|42|45|31|32|47|63|15|24	34|33|15|25	107	26.75	0	0.49	0.94
FlagBirA-PPP1R35_AAA_FIP	NP_001006.1	RPS11	7|11|13|15|0|0|9|9|7|8|4|6	11|9|12|13	45	11.25	0	0.8	0.91
FlagBirA-PPP1R35_AAA_FIP	NP_001008.1	RPS13	14|11|39|35|39|47|10|13|12|10|10|12	17|14|29|33	93	23.25	0	0.54	0.94
FlagBirA-PPP1R35_AAA_FIP	NP_001009.1	RPS15	0|0|33|30|31|35|21|25|0|0|4|11	41|23|24|22	110	27.5	0	0.81	0.93
FlagBirA-PPP1R35_AAA_FIP	NP_001011.1	RPS16	37|41|39|38|43|45|37|37|33|33|45|49	37|37|44|43	161	40.25	0	0.86	0.94
FlagBirA-PPP1R35_AAA_FIP	NP_001013.1	RPS19	6|5|21|19|16|13|3|2|3|3|2|2	6|7|7|8	28	7	0	0.35	0.93
FlagBirA-PPP1R35_AAA_FIP	NP_001019.1	RPS25	9|8|11|13|11|12|10|11|9|13|10|13	14|15|13|22	64	16	0	1.23	0.88
FlagBirA-PPP1R35_AAA_FIP	NP_001002.1	RPS7	10|9|39|39|31|33|13|11|18|10|8|8	16|19|21|20	76	19	0	0.49	0.94
FlagBirA-PPP1R35_AAA_FIP	NP_001003.1	RPS8	19|17|55|55|58|56|16|24|26|25|13|15	52|35|47|49	183	45.75	0	0.8	0.94
FlagBirA-PPP1R35_AAA_FIP	NP_001024.1	RRM1	30|27|0|0|0|0|39|35|70|56|36|37	17|23|22|27	89	22.25	0	0.35	0.94
FlagBirA-PPP1R35_AAA_FIP	NP_003698.1	RUVBL1	70|67|58|55|60|55|78|75|49|53|165|159	42|49|58|53	202	50.5	0	0.31	0.94
FlagBirA-PPP1R35_AAA_FIP	NP_003079.1	FSCN1	27|18|0|0|0|0|27|22|24|26|9|16	22|19|26|15	82	20.5	0	0.76	0.93
FlagBirA-PPP1R35_AAA_FIP	NP_003115.1	SPR	4|3|0|0|0|0|12|11|8|9|6|3	7|7|0|0	14	3.5	0	0.3	0.91
FlagBirA-PPP1R35_AAA_FIP	NP_003137.1	SSRP1	31|32|7|3|0|3|38|49|41|41|29|32	45|45|28|30	148	37	0	0.82	0.93
FlagBirA-PPP1R35_AAA_FIP	NP_003464.1	STAM	10|11|0|0|0|0|12|12|10|10|2|7	8|6|4|4	22	5.5	0	0.46	0.91
FlagBirA-PPP1R35_AAA_FIP	NP_003156.1	STXBP1	5|2|0|0|0|0|5|6|4|7|0|5	6|9|2|2	19	4.75	0	0.73	0.85
FlagBirA-PPP1R35_AAA_FIP	NP_003555.1	TAGLN2	24|29|0|0|0|0|26|25|8|8|25|34	18|22|35|33	108	27	0	0.86	0.93
FlagBirA-PPP1R35_AAA_FIP	NP_003290.1	HSP90B1	27|23|6|7|9|6|33|39|32|31|11|23	29|24|9|13	75	18.75	0	0.52	0.93
FlagBirA-PPP1R35_AAA_FIP	NP_003960.1	UBE2M	7|7|12|11|8|6|6|6|6|7|12|7	7|8|6|5	26	6.5	0	0.54	0.91
FlagBirA-PPP1R35_AAA_FIP	NP_000364.1	UMPS	13|13|4|6|5|6|15|23|9|12|14|17	12|6|9|10	37	9.25	0	0.46	0.93
FlagBirA-PPP1R35_AAA_FIP	NP_003671.1	YARS	3|3|0|0|5|3|2|4|4|3|0|0	3|0|0|0	3	0.75	0	0.17	0.86
FlagBirA-PPP1R35_AAA_FIP	NP_056076.1	NCAPD3	9|3|0|0|0|0|0|0|4|4|4|7	7|7|4|0	18	4.5	0	0.56	0.89
FlagBirA-PPP1R35_AAA_FIP	NP_065779.1	ESYT2	5|3|8|0|4|5|23|18|10|11|10|13	9|11|4|2	26	6.5	0	0.32	0.93
FlagBirA-PPP1R35_AAA_FIP	NP_991330.1	C19orf70	0|0|0|0|0|0|0|0|0|7|0|0	6|10|0|0	16	4	0.02	1.14	0.68
FlagBirA-PPP1R35_AAA_FIP	NP_001340.2	DARS	38|44|18|16|15|18|35|29|22|23|31|30	27|24|34|29	114	28.5	0	0.7	0.94
FlagBirA-PPP1R35_AAA_FIP	NP_071739.2	C17orf75	0|4|4|2|0|0|6|6|7|8|5|2	5|0|0|0	5	1.25	0	0.17	0.89
FlagBirA-PPP1R35_AAA_FIP	NP_995314.1	NCKAP1	22|21|0|0|0|0|27|26|19|21|23|27	11|17|12|15	55	13.75	0	0.51	0.93
FlagBirA-PPP1R35_AAA_FIP	NP_000010.1	ACAT1	45|49|48|52|63|57|43|46|32|34|41|45	40|39|42|43	164	41	0	0.68	0.94
FlagBirA-PPP1R35_AAA_FIP	NP_000373.1	ALDH3A2	7|9|6|6|5|6|7|9|10|14|8|7	4|5|9|7	25	6.25	0	0.52	0.91
FlagBirA-PPP1R35_AAA_FIP	NP_001273.1	AP2B1	24|21|9|14|7|9|21|29|30|31|26|28	47|38|27|20	132	33	0	1.08	0.92
FlagBirA-PPP1R35_AAA_FIP	NP_001274.1	AP1S1	5|5|0|0|0|0|4|3|3|7|0|0	3|3|0|2	8	2	0	0.33	0.89
FlagBirA-PPP1R35_AAA_FIP	NP_001315.1	CSTF1	4|9|0|0|0|0|9|8|11|9|9|6	15|19|14|10	58	14.5	0	1.45	0.83
FlagBirA-PPP1R35_AAA_FIP	NP_001319.1	CTBP1	27|25|0|0|0|0|14|19|8|10|21|9	10|11|10|14	45	11.25	0	0.43	0.93
FlagBirA-PPP1R35_AAA_FIP	NP_001379.1	DRG2	6|11|0|0|0|0|14|22|15|10|9|14	10|14|6|5	35	8.75	0	0.47	0.92
FlagBirA-PPP1R35_AAA_FIP	NP_000108.1	EMD	2|2|13|13|8|9|6|8|13|11|0|0	12|11|2|3	28	7	0	0.54	0.91
FlagBirA-PPP1R35_AAA_FIP	NP_000421.1	PAFAH1B1	11|9|0|0|0|0|10|10|7|8|6|9	13|11|8|6	38	9.5	0	0.9	0.89
FlagBirA-PPP1R35_AAA_FIP	NP_000294.1	PMM2	7|6|16|14|12|11|9|6|6|5|3|3	9|6|8|7	30	7.5	0	0.5	0.92
FlagBirA-PPP1R35_AAA_FIP	NP_055181.3	GNL3	4|7|18|19|13|17|0|2|0|5|2|3	23|27|16|13	79	19.75	0	1.07	0.91
FlagBirA-PPP1R35_AAA_FIP	NP_005119.2	DOPEY2	2|0|0|0|0|0|3|2|4|5|0|0	2|0|0|0	2	0.5	0	0.11	0.87
FlagBirA-PPP1R35_AAA_FIP	NP_055144.3	EDC4	12|8|0|0|0|0|18|16|13|18|9|13	11|8|0|0	19	4.75	0	0.26	0.93
FlagBirA-PPP1R35_AAA_FIP	NP_005434.4	PAPSS1	4|6|0|0|0|0|7|10|6|3|6|3	5|5|0|2	12	3	0	0.35	0.9
FlagBirA-PPP1R35_AAA_FIP	NP_004830.2	HOMER2	2|3|29|29|32|35|2|0|4|0|0|0	6|7|0|0	13	3.25	0	0.1	0.94
FlagBirA-PPP1R35_AAA_FIP	NP_060530.3	IARS2	19|18|0|0|0|0|9|12|7|8|29|25	16|17|8|7	48	12	0	0.44	0.93
FlagBirA-PPP1R35_AAA_FIP	NP_060707.2	CCAR1	10|8|4|5|3|0|9|12|16|16|0|4	12|9|4|0	25	6.25	0	0.39	0.92
FlagBirA-PPP1R35_AAA_FIP	NP_997657.1	GPS1	10|8|2|0|0|0|7|8|6|4|6|0	13|12|0|0	25	6.25	0	0.69	0.87
FlagBirA-PPP1R35_AAA_FIP	NP_002727.2	PRKAR2B	11|9|0|2|0|3|10|13|14|10|3|4	22|15|9|10	56	14	0	1.04	0.88
FlagBirA-PPP1R35_AAA_FIP	NP_002732.3	PKN1	9|5|0|0|0|0|13|11|21|16|10|10	16|13|10|14	53	13.25	0	0.72	0.92
FlagBirA-PPP1R35_AAA_FIP	NP_003843.3	TRIM24	3|3|0|0|0|0|8|4|8|10|8|10	7|9|12|9	37	9.25	0	0.93	0.89
FlagBirA-PPP1R35_AAA_FIP	NP_004175.2	WARS	37|47|35|30|27|29|67|61|48|58|11|9	61|49|48|52	210	52.5	0	0.82	0.94
FlagBirA-PPP1R35_AAA_FIP	NP_004840.1	ATG5	3|3|0|0|0|0|0|0|3|0|0|0	3|5|0|0	8	2	0	0.67	0.76
FlagBirA-PPP1R35_AAA_FIP	NP_597677.2	NIPBL	0|0|0|0|0|0|0|0|0|0|0|0	6|3|0|0	9	2.25	0.49	22.5	0.27
FlagBirA-PPP1R35_AAA_FIP	NP_004273.1	BAG2	3|6|8|7|8|10|6|6|5|6|4|4	9|10|17|11	47	11.75	0	1.31	0.82
FlagBirA-PPP1R35_AAA_FIP	NP_004716.1	BUB3	23|21|9|7|8|13|27|25|27|26|17|20	15|20|25|24	84	21	0	0.78	0.93
FlagBirA-PPP1R35_AAA_FIP	NP_004334.1	CALR	0|0|0|0|0|0|0|3|4|2|0|0	6|7|0|0	13	3.25	0	0.93	0.74
FlagBirA-PPP1R35_AAA_FIP	NP_004795.1	CIAO1	0|0|0|2|0|0|0|0|0|0|0|0	2|0|0|0	2	0.5	0.01	0.5	0.7
FlagBirA-PPP1R35_AAA_FIP	NP_004757.1	COPB2	29|31|19|27|19|17|42|42|43|42|28|28	39|45|24|40	148	37	0	0.87	0.93
FlagBirA-PPP1R35_AAA_FIP	NP_004085.1	EIF2S1	52|48|20|17|22|18|43|47|44|45|63|65	55|51|55|41	202	50.5	0	0.79	0.94
FlagBirA-PPP1R35_AAA_FIP	NP_004452.1	FARSA	33|32|4|6|4|6|28|37|32|31|31|37	30|32|31|32	125	31.25	0	0.84	0.93
FlagBirA-PPP1R35_AAA_FIP	NP_004508.1	ILK	8|8|0|0|0|0|7|10|8|7|2|5	4|8|7|10	29	7.25	0	0.81	0.89
FlagBirA-PPP1R35_AAA_FIP	NP_004530.1	NARS	63|62|71|67|74|65|62|54|54|53|58|49	70|71|66|75	282	70.5	0	0.97	0.94
FlagBirA-PPP1R35_AAA_FIP	NP_004535.1	NDUFA10	6|6|2|0|5|0|11|9|9|8|11|13	17|23|15|10	65	16.25	0	1.35	0.85
FlagBirA-PPP1R35_AAA_FIP	NP_004542.1	NDUFS3	15|13|19|17|12|18|25|24|16|16|19|21	12|20|23|14	69	17.25	0	0.7	0.93
FlagBirA-PPP1R35_AAA_FIP	NP_004138.1	DRG1	6|3|17|19|11|8|13|15|10|8|8|11	12|9|14|8	43	10.75	0	0.6	0.92
FlagBirA-PPP1R35_AAA_FIP	NP_004166.1	SNRPD3	4|4|9|10|8|6|7|3|6|4|4|5	6|7|23|16	52	13	0	1.37	0.73
FlagBirA-PPP1R35_AAA_FIP	NP_004263.1	HOMER1	4|5|43|44|22|27|3|0|8|4|0|0	18|16|10|8	52	13	0	0.3	0.94
FlagBirA-PPP1R35_AAA_FIP	NP_004715.1	ZW10	8|7|2|0|0|3|10|9|8|8|9|8	5|6|5|6	22	5.5	0	0.58	0.94
FlagBirA-PPP1R35_AAA_FIP	NP_060458.3	SCYL2	199|210|243|233|202|200|99|107|117|127|20|22	115|101|199|171	586	146.5	0	0.62	0.94
FlagBirA-PPP1R35_AAA_FIP	NP_998784.1	ATP6V1H	22|23|18|18|18|18|32|22|10|16|22|19	11|10|10|3	34	8.5	0	0.31	0.94
FlagBirA-PPP1R35_AAA_FIP	NP_004930.1	DDX1	8|6|9|9|8|0|11|14|23|29|4|0	19|23|19|16	77	19.25	0	0.74	0.93
FlagBirA-PPP1R35_AAA_FIP	NP_004949.1	MTOR	7|2|0|0|0|0|16|13|9|11|4|2	16|17|0|0	33	8.25	0	0.57	0.91
FlagBirA-PPP1R35_AAA_FIP	NP_005100.1	OXSR1	9|8|0|0|0|0|11|10|10|7|12|10	7|11|2|4	24	6	0	0.52	0.9
FlagBirA-PPP1R35_AAA_FIP	NP_005013.1	PFN1	170|189|32|29|26|28|115|123|120|104|253|282	126|95|196|195	612	153	0	0.57	0.94
FlagBirA-PPP1R35_AAA_FIP	NP_005042.1	QARS	75|76|30|36|23|22|86|82|72|81|87|87	59|54|39|27	179	44.75	0	0.51	0.94
FlagBirA-PPP1R35_AAA_FIP	NP_001001563.1	TIMM50	37|40|44|45|43|43|36|29|44|38|31|37	35|36|40|40	151	37.75	0	0.85	0.94
FlagBirA-PPP1R35_AAA_FIP	NP_002617.3	PFKL	49|38|52|50|46|43|49|59|49|54|37|40	61|53|35|35	184	46	0	0.81	0.94
FlagBirA-PPP1R35_AAA_FIP	NP_005040.2	PWP2	12|11|0|0|2|2|13|10|11|13|5|9	20|25|12|14	71	17.75	0	1.37	0.85
FlagBirA-PPP1R35_AAA_FIP	NP_006576.2	CCT8	126|137|156|155|156|158|120|120|123|122|126|115	96|100|128|138	462	115.5	0	0.74	0.94
FlagBirA-PPP1R35_AAA_FIP	NP_005262.1	GLUD1	0|0|20|15|14|22|0|0|9|7|5|3	4|3|9|8	24	6	0	0.29	0.93
FlagBirA-PPP1R35_AAA_FIP	NP_005436.1	SMC3	25|19|11|15|7|9|18|17|29|23|15|16	35|40|23|22	120	30	0	1.11	0.92
FlagBirA-PPP1R35_AAA_FIP	NP_005490.1	UBA2	8|4|0|0|0|0|13|12|19|15|9|9	9|6|0|6	21	5.25	0	0.31	0.93
FlagBirA-PPP1R35_AAA_FIP	NP_003746.2	EIF3G	4|4|6|6|5|5|6|3|6|3|5|2	7|6|6|3	22	5.5	0	0.92	0.85
FlagBirA-PPP1R35_AAA_FIP	NP_055186.2	AKAP8L	0|0|0|0|0|0|2|0|0|0|0|0	14|15|7|3	39	9.75	0.7	9.75	0.09
FlagBirA-PPP1R35_AAA_FIP	NP_940888.2	RPL7L1	0|0|0|0|0|0|0|0|2|0|0|0	5|4|4|4	17	4.25	0.27	4.25	0.41
FlagBirA-PPP1R35_AAA_FIP	NP_005727.1	ACTR1A	27|36|24|23|21|26|42|45|40|42|17|16	40|34|30|24	128	32	0	0.74	0.94
FlagBirA-PPP1R35_AAA_FIP	NP_005713.1	ACTR2	11|12|0|0|0|0|15|20|12|10|11|12	10|7|19|16	52	13	0	0.74	0.92
FlagBirA-PPP1R35_AAA_FIP	NP_005849.1	AKAP8	0|0|0|0|0|0|0|0|0|0|0|0	4|4|2|2	12	3	0.89	30	0.01
FlagBirA-PPP1R35_AAA_FIP	NP_005710.1	ARPC3	8|10|0|0|0|0|11|9|10|11|10|11	9|8|11|11	39	9.75	0	0.89	0.9
FlagBirA-PPP1R35_AAA_FIP	NP_005711.1	ARPC1B	8|8|0|0|0|0|0|3|5|7|4|3	6|7|5|9	27	6.75	0	0.84	0.88
FlagBirA-PPP1R35_AAA_FIP	NP_005757.1	FARP1	0|2|0|0|0|0|0|3|3|4|0|0	5|6|0|0	11	2.75	0	0.79	0.76
FlagBirA-PPP1R35_AAA_FIP	NP_005863.1	BCAS2	2|3|6|6|0|3|2|0|3|9|0|0	5|8|4|0	17	4.25	0	0.57	0.88
FlagBirA-PPP1R35_AAA_FIP	NP_005871.1	DNAJA2	20|29|52|52|37|28|47|41|35|38|51|47	30|23|9|17	79	19.75	0	0.38	0.94
FlagBirA-PPP1R35_AAA_FIP	NP_005521.1	IDH3A	24|30|6|6|5|5|26|23|12|12|30|29	19|18|30|32	99	24.75	0	0.82	0.93
FlagBirA-PPP1R35_AAA_FIP	NP_005733.1	PDIA6	40|32|20|20|21|22|33|36|31|29|33|39	28|27|31|27	113	28.25	0	0.72	0.93
FlagBirA-PPP1R35_AAA_FIP	NP_005737.1	NAMPT	76|75|78|74|69|74|88|86|66|76|46|51	66|89|66|67	288	72	0	0.83	0.94
FlagBirA-PPP1R35_AAA_FIP	NP_005796.1	PSMD14	6|7|17|17|20|15|11|12|7|7|6|7	12|11|0|6	29	7.25	0	0.39	0.93
FlagBirA-PPP1R35_AAA_FIP	NP_005769.1	RBM5	0|0|0|0|0|0|0|0|0|0|0|0	6|2|0|0	8	2	0.45	20	0.32
FlagBirA-PPP1R35_AAA_FIP	NP_005605.1	RHEB	9|9|0|0|0|0|10|8|11|9|8|13	9|7|8|5	29	7.25	0	0.6	0.91
FlagBirA-PPP1R35_AAA_FIP	NP_005608.1	RPS14	22|24|20|22|13|15|23|22|18|19|19|26	22|24|33|32	111	27.75	0	1.11	0.92
FlagBirA-PPP1R35_AAA_FIP	NP_005841.1	SF3B4	0|0|11|15|15|9|0|0|0|0|0|0	4|3|0|0	7	1.75	0	0.12	0.94
FlagBirA-PPP1R35_AAA_FIP	NP_005753.1	TRIM28	114|112|122|131|96|99|130|133|130|116|96|109	153|143|119|137	552	138	0	1.05	0.94
FlagBirA-PPP1R35_AAA_FIP	NP_001002252.1	ARL6IP4	0|0|0|3|0|0|3|0|2|2|0|0	3|0|0|0	3	0.75	0	0.25	0.81
FlagBirA-PPP1R35_AAA_FIP	NP_001272.2	TBCB	7|6|0|0|0|0|13|14|8|6|7|5	13|13|7|4	37	9.25	0	0.69	0.91
FlagBirA-PPP1R35_AAA_FIP	NP_060644.4	MAP1S	9|5|0|0|0|0|9|6|5|5|11|12	6|5|0|0	11	2.75	0	0.24	0.92
FlagBirA-PPP1R35_AAA_FIP	NP_001002800.1	SMC4	0|0|4|3|0|2|0|0|0|0|0|0	6|3|2|2	13	3.25	0	0.93	0.77
FlagBirA-PPP1R35_AAA_FIP	NP_005917.2	MFAP1	0|0|0|0|0|0|0|0|0|3|0|0	3|6|0|3	12	3	0.09	2	0.62
FlagBirA-PPP1R35_AAA_FIP	NP_003669.4	THOC5	0|2|0|0|0|0|6|7|0|9|5|5	12|10|5|5	32	8	0	1	0.86
FlagBirA-PPP1R35_AAA_FIP	NP_056450.2	GAPVD1	8|11|0|0|0|0|11|9|11|17|17|20	6|12|8|10	36	9	0	0.49	0.93
FlagBirA-PPP1R35_AAA_FIP	NP_006003.1	CLPP	0|0|6|4|4|4|0|0|4|0|0|0	6|2|2|3	13	3.25	0	0.65	0.84
FlagBirA-PPP1R35_AAA_FIP	NP_006089.1	GNB2L1	6|3|5|3|0|4|11|9|17|14|0|3	15|12|11|12	50	12.5	0	0.81	0.92
FlagBirA-PPP1R35_AAA_FIP	NP_006017.1	H1FX	0|0|8|7|5|6|4|0|5|0|0|0	9|10|5|6	30	7.5	0	1	0.86
FlagBirA-PPP1R35_AAA_FIP	NP_006080.1	SCML2	6|11|0|0|0|0|6|8|5|7|5|5	12|14|11|11	48	12	0	1.26	0.87
FlagBirA-PPP1R35_AAA_FIP	NP_064555.2	NCLN	0|3|5|7|5|0|3|0|8|8|3|5	4|5|0|0	9	2.25	0	0.28	0.9
FlagBirA-PPP1R35_AAA_FIP	NP_036313.3	FKBP8	8|11|11|10|8|9|12|14|15|16|9|8	13|16|14|10	53	13.25	0	0.85	0.91
FlagBirA-PPP1R35_AAA_FIP	NP_002801.1	PSMD4	10|8|21|17|11|13|12|8|11|11|6|5	7|8|6|6	27	6.75	0	0.36	0.94
FlagBirA-PPP1R35_AAA_FIP	NP_002444.2	MTIF2	0|0|0|0|0|0|0|0|0|0|0|0	5|2|0|0	7	1.75	0.45	17.5	0.32
FlagBirA-PPP1R35_AAA_FIP	NP_036565.2	SF3B1	26|23|61|69|87|84|46|45|38|49|5|10	29|37|19|24	109	27.25	0	0.32	0.94
FlagBirA-PPP1R35_AAA_FIP	NP_036558.3	SF3B3	16|13|62|66|69|75|19|18|19|23|11|10	27|24|12|18	81	20.25	0	0.28	0.94
FlagBirA-PPP1R35_AAA_FIP	NP_212132.2	DOCK7	6|6|0|0|0|0|7|4|4|3|4|5	11|12|7|5	35	8.75	0	1.35	0.8
FlagBirA-PPP1R35_AAA_FIP	NP_006316.1	RAN	41|46|11|7|3|6|29|39|48|44|42|37	43|52|50|43	188	47	0	1	0.93
FlagBirA-PPP1R35_AAA_FIP	NP_006312.1	ARIH2	8|7|0|0|0|0|10|10|9|9|0|0	13|10|3|5	31	7.75	0	0.78	0.89
FlagBirA-PPP1R35_AAA_FIP	NP_006132.1	DYNC1LI2	8|11|3|3|0|2|7|9|6|2|10|5	3|0|0|0	3	0.75	0	0.07	0.94
FlagBirA-PPP1R35_AAA_FIP	NP_006313.1	TUBGCP3	7|7|13|13|8|8|7|9|13|15|3|4	25|31|10|8	74	18.5	0	1.32	0.8
FlagBirA-PPP1R35_AAA_FIP	NP_006212.1	PIN1	5|5|0|0|0|0|4|5|5|0|3|0	15|13|0|4	32	8	0.16	1.6	0.6
FlagBirA-PPP1R35_AAA_FIP	NP_006215.1	PITPNA	4|6|0|0|0|0|0|0|0|0|0|0	3|0|4|0	7	1.75	0	0.35	0.86
FlagBirA-PPP1R35_AAA_FIP	NP_006349.1	SLC25A17	0|0|0|0|0|0|2|0|4|5|0|0	4|4|0|0	8	2	0	0.44	0.84
FlagBirA-PPP1R35_AAA_FIP	NP_006247.1	PKN2	20|17|0|0|0|0|18|15|26|17|13|15	24|22|26|40	112	28	0	1.22	0.9
FlagBirA-PPP1R35_AAA_FIP	NP_006251.1	DNAJC3	5|7|0|0|0|0|13|14|13|10|3|4	11|3|6|5	25	6.25	0	0.46	0.91
FlagBirA-PPP1R35_AAA_FIP	NP_006382.1	IPO7	49|63|24|27|26|24|58|60|49|56|37|38	65|52|39|33	189	47.25	0	0.77	0.94
FlagBirA-PPP1R35_AAA_FIP	NP_006338.1	PPIH	10|8|0|0|0|0|9|14|6|6|13|12	7|9|8|9	33	8.25	0	0.61	0.92
FlagBirA-PPP1R35_AAA_FIP	NP_006286.1	VARS	99|100|19|16|17|14|97|91|83|88|114|124	83|92|89|75	339	84.75	0	0.71	0.94
FlagBirA-PPP1R35_AAA_FIP	NP_006827.1	GCN1L1	136|132|95|82|73|75|158|175|145|126|55|64	133|148|48|39	368	92	0	0.55	0.94
FlagBirA-PPP1R35_AAA_FIP	NP_064572.2	C3orf37	2|0|0|3|0|0|0|0|3|3|0|0	8|5|0|4	17	4.25	0.03	1.42	0.67
FlagBirA-PPP1R35_AAA_FIP	NP_055635.3	TOMM70A	0|2|0|0|0|0|4|4|7|8|4|2	6|6|0|0	12	3	0	0.4	0.89
FlagBirA-PPP1R35_AAA_FIP	NP_055692.2	HELZ	0|0|0|0|0|0|0|0|0|0|0|0	4|0|0|0	4	1	0.25	10	0.45
FlagBirA-PPP1R35_AAA_FIP	NP_056046.1	NUP160	36|32|0|0|0|3|31|31|27|26|40|53	23|24|30|30	107	26.75	0	0.58	0.94
FlagBirA-PPP1R35_AAA_FIP	NP_114414.2	EIF2A	4|4|4|6|5|4|7|4|7|9|7|9	10|8|11|11	40	10	0	1.11	0.88
FlagBirA-PPP1R35_AAA_FIP	NP_055527.1	SETD1A	0|0|0|0|0|0|0|0|0|0|0|0	4|3|0|0	7	1.75	0.49	17.5	0.28
FlagBirA-PPP1R35_AAA_FIP	NP_001078.2	AAMP	6|6|0|0|0|0|5|9|7|7|11|7	6|4|6|3	19	4.75	0	0.47	0.91
FlagBirA-PPP1R35_AAA_FIP	NP_006833.2	SF3B2	3|2|30|27|33|26|4|4|2|3|0|0	11|9|3|0	23	5.75	0	0.18	0.94
FlagBirA-PPP1R35_AAA_FIP	NP_003694.1	NOP14	2|2|0|0|0|0|0|0|2|3|2|2	6|6|5|6	23	5.75	0.03	2.3	0.66
FlagBirA-PPP1R35_AAA_FIP	NP_060791.3	BRIX1	0|2|0|2|4|4|0|0|3|0|0|0	6|4|2|6	18	4.5	0	1.12	0.78
FlagBirA-PPP1R35_AAA_FIP	NP_036473.2	GTPBP4	0|2|0|0|3|0|0|0|5|2|0|0	13|11|5|7	36	9	0.21	2.25	0.53
FlagBirA-PPP1R35_AAA_FIP	NP_005372.2	NCL	3|0|80|86|70|76|14|7|22|22|0|0	35|28|16|18	97	24.25	0	0.29	0.94
FlagBirA-PPP1R35_AAA_FIP	NP_112556.2	HNRNPAB	6|3|13|10|10|10|3|3|0|3|0|0	5|7|0|2	14	3.5	0	0.3	0.91
FlagBirA-PPP1R35_AAA_FIP	NP_005852.2	STUB1	26|25|3|4|0|2|26|32|28|35|20|22	36|40|26|28	130	32.5	0	0.97	0.93
FlagBirA-PPP1R35_AAA_FIP	NP_077005.2	WDR18	17|17|0|0|0|0|17|16|19|18|9|10	19|16|22|16	73	18.25	0	0.99	0.92
FlagBirA-PPP1R35_AAA_FIP	NP_057371.2	HP1BP3	0|0|7|4|6|4|0|0|0|0|0|0	8|8|0|2	18	4.5	0	0.69	0.85
FlagBirA-PPP1R35_AAA_FIP	NP_004425.2	EML1	0|0|0|0|0|0|0|0|0|0|0|0	5|0|0|0	5	1.25	0.25	12.5	0.44
FlagBirA-PPP1R35_AAA_FIP	NP_001008938.1	CKAP5	26|28|4|4|0|5|34|30|20|18|31|27	10|8|8|5	31	7.75	0	0.24	0.94
FlagBirA-PPP1R35_AAA_FIP	NP_036465.2	MYCBP	5|8|29|32|34|37|5|6|11|11|0|0	11|6|10|8	35	8.75	0	0.25	0.94
FlagBirA-PPP1R35_AAA_FIP	NP_006658.1	PGRMC1	10|13|35|40|32|35|11|9|5|8|11|9	5|8|6|3	22	5.5	0	0.15	0.94
FlagBirA-PPP1R35_AAA_FIP	NP_006547.1	PMVK	6|3|0|0|0|0|5|5|2|0|4|3	8|5|6|4	23	5.75	0	1.05	0.83
FlagBirA-PPP1R35_AAA_FIP	NP_006657.1	RUVBL2	65|64|65|59|58|64|54|62|37|29|86|87	55|44|60|55	214	53.5	0	0.62	0.94
FlagBirA-PPP1R35_AAA_FIP	NP_006510.1	DYNLT1	0|4|0|0|0|0|0|5|0|5|0|0	4|3|8|0	15	3.75	0	0.75	0.81
FlagBirA-PPP1R35_AAA_FIP	NP_055970.1	LARP4B	3|2|3|5|2|0|5|4|6|7|3|5	11|11|10|13	45	11.25	0	1.73	0.78
FlagBirA-PPP1R35_AAA_FIP	NP_056084.1	ZCCHC11	0|0|0|0|0|0|0|3|0|0|0|0	5|4|0|0	9	2.25	0.07	1.5	0.63
FlagBirA-PPP1R35_AAA_FIP	NP_055871.1	RRP1B	0|0|12|13|16|12|0|0|0|0|0|0	6|5|4|3	18	4.5	0	0.31	0.92
FlagBirA-PPP1R35_AAA_FIP	NP_056340.2	IBTK	0|0|0|0|0|0|0|0|0|0|0|0	2|2|0|0	4	1	0.39	10	0.36
FlagBirA-PPP1R35_AAA_FIP	NP_006809.1	MLLT11	0|5|6|7|3|4|10|4|8|9|4|3	4|0|6|8	18	4.5	0	0.47	0.9
FlagBirA-PPP1R35_AAA_FIP	NP_006807.1	LMAN2	5|0|13|8|14|10|4|2|8|4|4|4	4|0|3|0	7	1.75	0	0.13	0.94
FlagBirA-PPP1R35_AAA_FIP	NP_006796.1	HNRNPA0	20|25|13|15|16|13|19|16|18|21|8|11	27|20|22|25	94	23.5	0	1.02	0.92
FlagBirA-PPP1R35_AAA_FIP	NP_006806.1	TMED2	0|0|6|5|4|0|2|0|0|0|0|0	3|0|3|0	6	1.5	0	0.27	0.88
FlagBirA-PPP1R35_AAA_FIP	NP_006810.1	STIP1	2|3|0|0|0|0|7|6|0|4|0|2	6|4|8|8	26	6.5	0	1	0.85
FlagBirA-PPP1R35_AAA_FIP	NP_006775.1	WDR3	9|10|4|8|4|3|16|16|19|18|5|4	19|26|9|10	64	16	0	0.86	0.91
FlagBirA-PPP1R35_AAA_FIP	NP_004406.2	DSP	0|5|7|11|6|3|15|10|26|18|8|6	8|21|11|9	49	12.25	0	0.56	0.92
FlagBirA-PPP1R35_AAA_FIP	NP_008996.1	CDC37	16|17|9|8|7|8|24|26|32|29|8|12	37|29|26|24	116	29	0	0.95	0.93
FlagBirA-PPP1R35_AAA_FIP	NP_008993.1	PWP1	0|2|0|0|0|2|0|0|2|4|0|0	3|3|0|0	6	1.5	0	0.5	0.8
FlagBirA-PPP1R35_AAA_FIP	NP_689969.2	RICTOR	0|0|0|0|0|0|0|0|0|0|0|0	4|0|0|0	4	1	0.25	10	0.45
FlagBirA-PPP1R35_AAA_FIP	NP_009123.1	SUPT16H	19|9|5|4|0|0|18|27|40|43|3|9	58|50|17|16	141	35.25	0	0.85	0.93
FlagBirA-PPP1R35_AAA_FIP	NP_009202.1	STK38	96|89|250|257|230|222|69|76|73|74|14|14	68|64|81|78	291	72.75	0	0.29	0.94
FlagBirA-PPP1R35_AAA_FIP	NP_009121.1	SEC23IP	3|2|0|0|0|0|9|10|5|7|5|10	3|3|4|6	16	4	0	0.4	0.91
FlagBirA-PPP1R35_AAA_FIP	NP_009140.1	RPL35	0|2|6|6|6|6|0|3|3|4|0|0	6|7|0|0	13	3.25	0	0.54	0.86
FlagBirA-PPP1R35_AAA_FIP	NP_009145.1	SEC63	5|3|10|12|9|10|7|7|14|22|10|14	13|17|8|8	46	11.5	0	0.64	0.92
FlagBirA-PPP1R35_AAA_FIP	NP_009210.1	U2AF2	44|34|21|18|11|8|33|43|47|49|30|38	61|49|63|70	243	60.75	0	1.27	0.93
FlagBirA-PPP1R35_AAA_FIP	NP_000131.2	FECH	9|6|2|0|6|5|8|6|7|4|14|5	10|11|9|7	37	9.25	0	0.8	0.9
FlagBirA-PPP1R35_AAA_FIP	NP_112493.2	SEH1L	11|10|3|4|2|3|12|9|11|9|8|13	10|11|9|5	35	8.75	0	0.7	0.91
FlagBirA-PPP1R35_AAA_FIP	NP_001012680.1	SLC3A2	5|3|13|14|5|8|8|7|14|12|2|3	5|4|2|0	11	2.75	0	0.2	0.94
FlagBirA-PPP1R35_AAA_FIP	NP_006222.2	POLE	3|3|0|0|0|0|4|3|9|8|4|5	4|9|9|9	31	7.75	0	0.91	0.88
FlagBirA-PPP1R35_AAA_FIP	NP_004437.2	EPRS	141|139|99|91|77|83|120|108|115|96|127|135	115|105|80|69	369	92.25	0	0.66	0.94
FlagBirA-PPP1R35_AAA_FIP	NP_078934.3	IPO4	47|47|27|25|26|31|67|65|62|55|47|46	62|52|36|32	182	45.5	0	0.69	0.94
FlagBirA-PPP1R35_AAA_FIP	NP_001015052.1	MPG	5|4|0|0|0|0|6|4|4|4|0|0	10|9|10|9	38	9.5	0	1.73	0.78
FlagBirA-PPP1R35_AAA_FIP	NP_061036.3	YOD1	0|0|0|0|0|0|0|0|0|0|0|0	3|0|0|3	6	1.5	0.48	15	0.3
FlagBirA-PPP1R35_AAA_FIP	NP_004131.3	LLGL1	4|7|0|0|0|0|3|5|2|0|13|10	5|4|5|3	17	4.25	0	0.37	0.92
FlagBirA-PPP1R35_AAA_FIP	NP_115717.3	DDI2	15|13|0|0|0|0|19|17|13|14|10|10	10|17|14|9	50	12.5	0	0.69	0.92
FlagBirA-PPP1R35_AAA_FIP	NP_003123.2	SRM	33|37|0|0|0|0|30|31|31|36|32|32	38|29|27|27	121	30.25	0	0.83	0.93
FlagBirA-PPP1R35_AAA_FIP	NP_031401.1	TARDBP	23|18|12|13|16|16|12|11|15|18|8|10	36|23|22|16	97	24.25	0	1.18	0.9
FlagBirA-PPP1R35_AAA_FIP	NP_001018494.1	PUM1	3|4|0|0|0|2|11|9|10|7|4|6	15|15|5|5	40	10	0	0.95	0.88
FlagBirA-PPP1R35_AAA_FIP	NP_004453.3	FDFT1	9|9|0|3|0|2|14|12|17|15|18|20	3|4|12|10	29	7.25	0	0.38	0.93
FlagBirA-PPP1R35_AAA_FIP	NP_008860.4	SKIV2L	12|12|3|4|3|0|16|11|15|14|13|11	25|17|8|8	58	14.5	0	0.94	0.89
FlagBirA-PPP1R35_AAA_FIP	NP_061903.2	DHX29	0|3|0|0|0|0|6|6|4|5|2|2	7|7|6|7	27	6.75	0	1.12	0.85
FlagBirA-PPP1R35_AAA_FIP	NP_005073.2	TRIM25	15|14|3|5|4|3|18|21|13|18|12|10	22|18|17|21	78	19.5	0	1	0.92
FlagBirA-PPP1R35_AAA_FIP	NP_008924.1	NPM3	7|7|0|0|0|0|0|0|0|0|8|10	6|0|6|6	18	4.5	0	0.5	0.9
FlagBirA-PPP1R35_AAA_FIP	NP_036330.1	GCA	9|9|0|0|0|0|4|8|0|0|3|7	2|3|0|0	5	1.25	0	0.14	0.94
FlagBirA-PPP1R35_AAA_FIP	NP_036335.1	GRHPR	20|16|2|2|0|0|15|21|11|11|26|19	9|12|4|5	30	7.5	0	0.32	0.93
FlagBirA-PPP1R35_AAA_FIP	NP_036450.1	LETM1	8|7|15|18|12|16|22|17|20|21|17|11	21|20|11|7	59	14.75	0	0.69	0.92
FlagBirA-PPP1R35_AAA_FIP	NP_036357.1	NUBP2	16|17|7|11|8|12|25|24|22|18|9|11	22|26|11|11	70	17.5	0	0.71	0.93
FlagBirA-PPP1R35_AAA_FIP	NP_036220.1	PGLS	22|32|0|0|0|0|50|46|28|31|27|29	29|35|26|23	113	28.25	0	0.59	0.94
FlagBirA-PPP1R35_AAA_FIP	NP_036545.1	QPCT	13|12|50|59|52|51|37|32|27|31|12|9	21|21|40|26	108	27	0	0.49	0.94
FlagBirA-PPP1R35_AAA_FIP	NP_055791.1	PDCD11	0|0|0|0|0|0|0|0|0|0|0|0	10|7|0|6	23	5.75	0.75	57.5	0.05
FlagBirA-PPP1R35_AAA_FIP	NP_000365.3	UROD	26|35|0|0|0|0|35|30|24|15|30|34	23|16|13|9	61	15.25	0	0.44	0.93
FlagBirA-PPP1R35_AAA_FIP	NP_001119.3	AP1G1	16|15|0|0|0|0|15|20|17|17|8|13	10|10|7|8	35	8.75	0	0.47	0.94
FlagBirA-PPP1R35_AAA_FIP	NP_006651.2	CLPX	9|11|18|17|16|19|12|15|20|17|17|16	15|17|14|16	62	15.5	0	0.79	0.92
FlagBirA-PPP1R35_AAA_FIP	NP_001026859.1	PLAA	6|6|23|16|13|13|6|7|14|11|5|3	17|20|10|12	59	14.75	0	0.76	0.92
FlagBirA-PPP1R35_AAA_FIP	NP_038470.1	STOML2	17|13|10|8|0|0|17|19|23|28|10|13	19|17|17|17	70	17.5	0	0.69	0.93
FlagBirA-PPP1R35_AAA_FIP	NP_060542.4	HEATR1	5|4|0|2|0|0|8|12|11|8|6|5	15|5|5|4	29	7.25	0	0.63	0.89
FlagBirA-PPP1R35_AAA_FIP	NP_072047.4	VPS52	0|0|0|0|0|0|0|3|0|0|0|0	2|3|0|0	5	1.25	0.01	0.83	0.69
FlagBirA-PPP1R35_AAA_FIP	NP_057393.2	LCMT1	7|5|0|0|0|0|6|6|8|5|0|0	7|9|3|2	21	5.25	0	0.7	0.87
FlagBirA-PPP1R35_AAA_FIP	NP_001027565.1	HNRNPH2	17|18|19|19|20|27|15|22|18|39|18|23	37|29|31|46	143	35.75	0	1.08	0.93
FlagBirA-PPP1R35_AAA_FIP	NP_005906.2	MCM6	75|87|15|14|9|10|71|67|74|78|69|71	75|67|64|63	269	67.25	0	0.82	0.94
FlagBirA-PPP1R35_AAA_FIP	NP_036585.1	TBL2	2|2|0|0|0|0|2|3|2|0|0|0	3|0|0|2	5	1.25	0	0.5	0.78
FlagBirA-PPP1R35_AAA_FIP	NP_001028675.1	SAR1B	0|0|0|0|0|0|0|0|0|8|0|0	6|4|0|0	10	2.5	0	0.62	0.78
FlagBirA-PPP1R35_AAA_FIP	NP_055140.1	CORO1C	41|38|0|0|0|0|28|31|29|25|19|21	34|32|33|27	126	31.5	0	0.8	0.93
FlagBirA-PPP1R35_AAA_FIP	NP_055121.1	C22orf28	18|20|13|16|13|12|40|41|51|46|30|28	47|46|30|43	166	41.5	0	0.86	0.94
FlagBirA-PPP1R35_AAA_FIP	NP_055288.1	DIMT1	2|2|0|0|0|0|3|3|4|3|0|0	7|4|10|6	27	6.75	0.05	1.93	0.64
FlagBirA-PPP1R35_AAA_FIP	NP_055398.1	LMCD1	3|0|0|0|0|0|4|3|0|0|2|3	5|0|0|0	5	1.25	0	0.36	0.79
FlagBirA-PPP1R35_AAA_FIP	NP_055317.1	PRPF19	14|13|13|12|14|11|11|7|10|16|2|3	26|25|7|11	69	17.25	0	1.15	0.88
FlagBirA-PPP1R35_AAA_FIP	NP_054781.1	NOB1	0|0|2|5|0|0|4|4|5|8|5|6	4|6|6|7	23	5.75	0	0.82	0.88
FlagBirA-PPP1R35_AAA_FIP	NP_054884.1	NDUFAF4	0|5|0|0|0|0|6|4|3|2|4|2	3|6|0|0	9	2.25	0	0.41	0.86
FlagBirA-PPP1R35_AAA_FIP	NP_054727.1	CCDC22	0|3|0|0|0|0|10|7|5|12|0|0	10|12|2|3	27	6.75	0	0.61	0.9
FlagBirA-PPP1R35_AAA_FIP	NP_055629.1	PSMD6	24|23|30|31|23|25|26|28|14|21|18|18	24|20|12|14	70	17.5	0	0.57	0.93
FlagBirA-PPP1R35_AAA_FIP	NP_055555.1	EIF4A3	15|18|2|3|0|0|15|23|31|26|12|11	36|32|11|12	91	22.75	0	0.8	0.93
FlagBirA-PPP1R35_AAA_FIP	NP_055448.1	CTR9	3|4|0|0|0|0|4|3|2|7|5|5	9|8|2|8	27	6.75	0	1.12	0.83
FlagBirA-PPP1R35_AAA_FIP	NP_055521.1	SART3	15|11|0|0|0|0|16|16|11|12|5|6	32|29|18|18	97	24.25	0	1.52	0.86
FlagBirA-PPP1R35_AAA_FIP	NP_055523.1	KNTC1	0|4|0|3|0|0|8|7|4|8|6|5	10|4|4|3	21	5.25	0	0.66	0.87
FlagBirA-PPP1R35_AAA_FIP	NP_055688.1	LPGAT1	0|0|0|0|0|0|0|0|0|0|0|0	3|0|0|0	3	0.75	0.24	7.5	0.48
FlagBirA-PPP1R35_AAA_FIP	NP_055454.1	TTC37	17|16|4|5|0|0|18|21|18|17|13|19	22|23|10|12	67	16.75	0	0.84	0.92
FlagBirA-PPP1R35_AAA_FIP	NP_006819.2	ASCC3	11|5|6|0|4|0|7|6|11|16|9|11	11|12|8|13	44	11	0	0.81	0.91
FlagBirA-PPP1R35_AAA_FIP	NP_057488.1	TRMT112	3|3|0|0|0|0|0|0|4|0|0|2	2|0|0|0	2	0.5	0	0.14	0.85
FlagBirA-PPP1R35_AAA_FIP	NP_057130.1	EXOSC1	3|5|0|0|0|0|7|5|0|3|6|5	6|3|0|0	9	2.25	0	0.35	0.88
FlagBirA-PPP1R35_AAA_FIP	NP_057226.1	HSD17B12	18|23|4|0|13|7|22|27|26|24|27|25	20|22|14|14	70	17.5	0	0.65	0.93
FlagBirA-PPP1R35_AAA_FIP	NP_057731.1	C8orf55	0|0|4|3|0|0|3|3|3|4|0|0	5|4|0|0	9	2.25	0	0.56	0.81
FlagBirA-PPP1R35_AAA_FIP	NP_057018.1	NOP58	3|4|0|0|2|3|8|5|12|11|5|2	19|15|9|9	52	13	0	1.13	0.87
FlagBirA-PPP1R35_AAA_FIP	NP_057123.1	C14orf166	0|0|4|6|0|0|6|4|6|4|0|2	12|10|2|5	29	7.25	0	1.21	0.77
FlagBirA-PPP1R35_AAA_FIP	NP_057131.1	SF3B14	5|7|7|8|4|6|6|0|7|6|0|4	3|7|3|3	16	4	0	0.53	0.89
FlagBirA-PPP1R35_AAA_FIP	NP_057141.1	COPZ1	0|0|5|3|0|0|5|0|11|10|0|0	4|4|4|2	14	3.5	0	0.33	0.91
FlagBirA-PPP1R35_AAA_FIP	NP_057146.1	FAM96B	2|0|0|4|0|0|3|0|0|3|0|0	2|0|0|0	2	0.5	0	0.14	0.85
FlagBirA-PPP1R35_AAA_FIP	NP_057161.1	PTRH2	6|5|8|7|10|8|6|10|6|7|0|0	6|5|0|0	11	2.75	0	0.28	0.94
FlagBirA-PPP1R35_AAA_FIP	NP_057291.1	CPSF3	7|6|0|0|0|0|10|12|13|10|3|6	14|5|8|10	37	9.25	0	0.74	0.9
FlagBirA-PPP1R35_AAA_FIP	NP_057308.1	SNX9	0|0|0|0|0|0|0|0|3|4|0|2	7|4|0|2	13	3.25	0	0.93	0.75
FlagBirA-PPP1R35_AAA_FIP	NP_055205.2	SND1	13|20|0|0|0|0|28|38|36|43|12|15	50|45|21|24	140	35	0	0.86	0.93
FlagBirA-PPP1R35_AAA_FIP	NP_005024.2	EXOSC9	4|3|0|0|0|0|7|7|7|3|5|5	2|3|0|0	5	1.25	0	0.18	0.94
FlagBirA-PPP1R35_AAA_FIP	NP_003964.3	RPL14	5|5|8|9|9|8|5|5|6|6|10|7	7|7|0|8	22	5.5	0	0.58	0.9
FlagBirA-PPP1R35_AAA_FIP	NP_009166.2	XPOT	53|54|35|33|32|34|70|63|43|50|39|42	53|57|36|34	180	45	0	0.68	0.94
FlagBirA-PPP1R35_AAA_FIP	NP_065816.2	UBR4	19|11|19|17|17|12|29|31|33|26|8|11	65|63|12|15	155	38.75	0	1.21	0.9
FlagBirA-PPP1R35_AAA_FIP	NP_057383.2	HSPA14	15|18|0|0|0|0|17|16|13|17|9|15	9|15|7|8	39	9.75	0	0.56	0.92
FlagBirA-PPP1R35_AAA_FIP	NP_003898.2	EIF2B5	3|5|2|0|0|2|12|9|5|6|9|7	12|18|6|12	48	12	0	1.14	0.86
FlagBirA-PPP1R35_AAA_FIP	NP_005877.2	KATNB1	6|4|0|2|0|0|4|5|5|4|0|3	4|6|0|0	10	2.5	0	0.45	0.85
FlagBirA-PPP1R35_AAA_FIP	NP_037397.2	C11orf2	3|3|0|0|0|0|8|6|5|6|0|2	5|7|0|4	16	4	0	0.57	0.88
FlagBirA-PPP1R35_AAA_FIP	NP_056044.3	KIAA0664	38|35|0|0|0|0|37|42|37|33|38|49	21|18|25|25	89	22.25	0	0.49	0.94
FlagBirA-PPP1R35_AAA_FIP	NP_060504.1	WDR70	0|0|0|0|0|0|3|6|6|3|2|0	6|11|0|6	23	5.75	0	0.96	0.8
FlagBirA-PPP1R35_AAA_FIP	NP_060517.1	RBM22	0|0|0|0|0|0|0|0|2|2|0|0	2|0|0|3	5	1.25	0	0.62	0.75
FlagBirA-PPP1R35_AAA_FIP	NP_060686.1	PANK4	13|9|6|8|5|3|11|6|3|4|6|7	16|13|3|0	32	8	0	0.67	0.89
FlagBirA-PPP1R35_AAA_FIP	NP_060708.1	AGK	0|5|7|5|12|3|5|4|16|16|3|0	4|7|2|3	16	4	0	0.25	0.93
FlagBirA-PPP1R35_AAA_FIP	NP_060277.1	OSGEP	8|10|7|5|4|3|6|8|10|6|5|6	7|9|7|6	29	7.25	0	0.72	0.9
FlagBirA-PPP1R35_AAA_FIP	NP_060295.1	ADPRHL2	2|4|0|0|0|0|5|4|5|0|3|0	2|2|0|0	4	1	0	0.2	0.88
FlagBirA-PPP1R35_AAA_FIP	NP_060357.1	C1orf123	0|4|0|0|0|0|7|5|4|0|0|0	3|3|0|0	6	1.5	0	0.25	0.89
FlagBirA-PPP1R35_AAA_FIP	NP_060366.1	C20orf11	3|0|11|7|7|3|6|10|8|5|0|0	9|5|9|7	30	7.5	0	0.71	0.9
FlagBirA-PPP1R35_AAA_FIP	NP_060017.1	FOXRED1	0|0|0|0|0|0|2|2|0|0|3|0	3|2|0|0	5	1.25	0	0.5	0.78
FlagBirA-PPP1R35_AAA_FIP	NP_060947.1	ACTR10	6|6|0|0|0|0|11|8|4|0|0|0	4|5|0|2	11	2.75	0	0.29	0.91
FlagBirA-PPP1R35_AAA_FIP	NP_061156.1	CMAS	5|5|0|3|0|0|5|9|5|8|3|4	19|16|10|9	54	13.5	0	1.59	0.76
FlagBirA-PPP1R35_AAA_FIP	NP_003904.3	PRPF4B	0|0|0|0|2|2|0|0|3|2|0|0	8|11|2|0	21	5.25	0.32	2.1	0.4
FlagBirA-PPP1R35_AAA_FIP	NP_000099.2	DLD	12|12|0|0|0|0|14|11|11|4|9|14	10|9|16|10	45	11.25	0	0.8	0.91
FlagBirA-PPP1R35_AAA_FIP	NP_003293.2	TRIP6	4|6|6|6|3|0|6|4|4|3|5|4	6|5|5|5	21	5.25	0	0.88	0.86
FlagBirA-PPP1R35_AAA_FIP	NP_055520.3	DOCK4	33|21|123|112|116|120|8|3|23|28|0|0	19|9|21|10	59	14.75	0	0.12	0.94
FlagBirA-PPP1R35_AAA_FIP	NP_004990.3	MYO6	22|19|0|4|0|2|20|26|16|20|10|16	33|41|29|28	131	32.75	0	1.36	0.91
FlagBirA-PPP1R35_AAA_FIP	NP_055870.2	SWAP70	3|0|0|0|0|0|5|7|2|0|0|0	5|3|0|0	8	2	0	0.33	0.88
FlagBirA-PPP1R35_AAA_FIP	NP_004270.2	PMPCB	25|25|0|0|2|3|21|25|22|21|31|29	23|23|30|29	105	26.25	0	0.88	0.93
FlagBirA-PPP1R35_AAA_FIP	NP_001035526.1	YARS2	11|13|0|0|0|0|18|16|11|14|0|0	35|25|5|5	70	17.5	0	1.03	0.85
FlagBirA-PPP1R35_AAA_FIP	NP_038203.2	IARS	176|158|85|86|86|75|118|141|100|114|118|115	152|142|86|93	473	118.25	0	0.71	0.94
FlagBirA-PPP1R35_AAA_FIP	NP_149124.3	CNP	17|16|19|19|18|14|18|18|14|18|13|17	16|18|19|15	68	17	0	0.89	0.92
FlagBirA-PPP1R35_AAA_FIP	NP_060684.4	LRRC1	0|7|21|9|0|0|0|7|8|7|6|33	10|18|10|6	44	11	0	0.41	0.93
FlagBirA-PPP1R35_AAA_FIP	NP_060191.3	CC2D1A	0|0|0|0|0|0|0|0|5|0|0|0	3|5|0|0	8	2	0	0.8	0.72
FlagBirA-PPP1R35_AAA_FIP	NP_006818.3	TMED10	5|6|9|9|7|6|0|0|0|5|0|3	8|9|2|4	23	5.75	0	0.64	0.89
FlagBirA-PPP1R35_AAA_FIP	NP_064576.1	MRPS22	2|2|0|0|2|0|0|0|0|0|2|0	11|17|4|5	37	9.25	0.51	4.62	0.15
FlagBirA-PPP1R35_AAA_FIP	NP_009191.1	LYPLA2	0|0|0|2|0|0|4|6|0|2|11|0	4|3|0|0	7	1.75	0	0.21	0.9
FlagBirA-PPP1R35_AAA_FIP	NP_065108.1	C12orf5	5|0|0|0|0|0|4|6|5|4|0|0	6|3|3|4	16	4	0	0.73	0.85
FlagBirA-PPP1R35_AAA_FIP	NP_065134.1	NUP107	14|12|13|10|15|14|22|19|25|36|17|17	31|33|22|20	106	26.5	0	0.87	0.93
FlagBirA-PPP1R35_AAA_FIP	NP_003751.2	EIF4G3	3|5|0|0|0|0|12|9|4|5|4|3	9|4|0|7	20	5	0	0.48	0.9
FlagBirA-PPP1R35_AAA_FIP	NP_056240.2	POLR1A	6|14|0|0|0|0|13|10|12|13|22|22	20|27|20|17	84	21	0	0.95	0.92
FlagBirA-PPP1R35_AAA_FIP	NP_066298.1	HIST1H3F	5|4|8|8|6|4|3|3|5|6|0|0	3|3|6|5	17	4.25	0	0.53	0.89
FlagBirA-PPP1R35_AAA_FIP	NP_066407.1	HIST1H2BD	23|31|16|15|13|15|14|18|61|67|17|19	40|39|53|54	186	46.5	0	0.73	0.94
FlagBirA-PPP1R35_AAA_FIP	NP_066406.1	HIST1H2BB	0|0|16|13|13|15|0|0|61|65|0|17	37|37|54|50	178	44.5	0	0.71	0.94
FlagBirA-PPP1R35_AAA_FIP	NP_001078929.1	CTNND1	4|2|5|0|4|3|9|5|13|14|9|12	16|18|12|14	60	15	0	1.11	0.9
FlagBirA-PPP1R35_AAA_FIP	NP_001655.1	RHOA	8|10|12|10|9|8|15|9|16|11|13|0	10|9|13|12	44	11	0	0.71	0.92
FlagBirA-PPP1R35_AAA_FIP	NP_002511.1	NPM1	20|15|102|92|104|108|29|37|27|18|23|20	37|38|37|44	156	39	0	0.37	0.94
FlagBirA-PPP1R35_AAA_FIP	NP_066953.1	PPIA	31|34|0|0|0|0|22|27|17|20|24|31	25|22|18|19	84	21	0	0.65	0.93
FlagBirA-PPP1R35_AAA_FIP	NP_001035918.1	MST4	2|0|0|0|0|0|7|6|11|14|0|4	8|10|0|0	18	4.5	0	0.36	0.91
FlagBirA-PPP1R35_AAA_FIP	NP_008878.3	SRP72	18|17|16|20|11|11|17|15|13|17|12|15	28|37|20|20	105	26.25	0	1.38	0.88
FlagBirA-PPP1R35_AAA_FIP	NP_001035982.1	DIAPH3	0|0|0|0|0|0|0|0|0|3|0|0	4|2|0|0	6	1.5	0.02	1	0.67
FlagBirA-PPP1R35_AAA_FIP	NP_036347.1	MGEA5	17|13|0|0|2|0|19|25|24|17|24|23	17|21|10|7	55	13.75	0	0.56	0.93
FlagBirA-PPP1R35_AAA_FIP	NP_001036004.1	MAZ	0|0|0|0|0|0|0|0|0|0|0|0	2|0|0|0	2	0.5	0.2	5	0.53
FlagBirA-PPP1R35_AAA_FIP	NP_003176.2	TAF4	4|3|0|0|0|0|2|5|11|13|0|0	7|15|9|4	35	8.75	0	0.73	0.9
FlagBirA-PPP1R35_AAA_FIP	NP_003277.1	TOP1	0|0|0|0|0|0|0|0|0|5|0|0	5|4|0|3	12	3	0.01	1.2	0.72
FlagBirA-PPP1R35_AAA_FIP	NP_002065.1	GNB1	4|4|0|0|5|5|7|5|8|5|9|9	6|4|7|9	26	6.5	0	0.72	0.89
FlagBirA-PPP1R35_AAA_FIP	NP_002618.1	PFKP	52|57|75|71|75|84|52|53|47|63|51|59	70|61|71|71	273	68.25	0	0.86	0.94
FlagBirA-PPP1R35_AAA_FIP	NP_004228.1	TRIP13	33|33|9|11|6|9|37|39|31|28|27|28	29|32|17|19	97	24.25	0	0.64	0.93
FlagBirA-PPP1R35_AAA_FIP	NP_065971.2	CHD8	0|0|0|0|0|0|2|2|0|0|0|0	5|0|3|2	10	2.5	0.02	1.25	0.69
FlagBirA-PPP1R35_AAA_FIP	NP_005442.2	PDLIM7	0|0|0|0|0|0|5|5|5|2|5|5	6|3|0|0	9	2.25	0	0.45	0.84
FlagBirA-PPP1R35_AAA_FIP	NP_071413.1	GOLPH3	4|7|0|4|0|0|4|4|6|0|7|13	6|4|4|0	14	3.5	0	0.35	0.91
FlagBirA-PPP1R35_AAA_FIP	NP_004680.2	MTA1	3|8|8|9|9|2|9|8|10|12|0|0	26|18|10|5	59	14.75	0	1.34	0.75
FlagBirA-PPP1R35_AAA_FIP	NP_004730.2	MTA2	3|0|0|0|0|0|3|6|7|6|0|3	6|7|3|0	16	4	0	0.62	0.87
FlagBirA-PPP1R35_AAA_FIP	NP_002733.2	PRKD1	0|0|0|0|0|0|0|0|0|0|0|0	2|3|0|0	5	1.25	0.44	12.5	0.34
FlagBirA-PPP1R35_AAA_FIP	NP_001447.2	FLNA	15|13|175|120|90|102|29|19|18|21|11|11	13|15|16|11	55	13.75	0	0.09	0.94
FlagBirA-PPP1R35_AAA_FIP	NP_000019.2	AGL	12|12|0|0|0|0|28|23|30|24|11|8	24|22|4|10	60	15	0	0.52	0.93
FlagBirA-PPP1R35_AAA_FIP	NP_057342.2	YTHDF2	10|4|4|5|3|4|5|7|5|5|6|7	7|4|4|4	19	4.75	0	0.56	0.9
FlagBirA-PPP1R35_AAA_FIP	NP_057103.2	LUC7L2	6|5|6|6|0|4|6|7|5|5|5|6	7|7|4|3	21	5.25	0	0.81	0.86
FlagBirA-PPP1R35_AAA_FIP	NP_057479.2	PTPLAD1	5|6|11|13|11|10|5|6|15|20|7|6	9|8|3|5	25	6.25	0	0.36	0.94
FlagBirA-PPP1R35_AAA_FIP	NP_112604.2	HNRNPC	15|19|0|3|5|4|15|12|20|26|5|5	32|29|21|18	100	25	0	1.09	0.92
FlagBirA-PPP1R35_AAA_FIP	NP_001070909.1	BCLAF1	0|0|3|2|11|9|4|0|13|13|0|0	11|12|2|3	28	7	0	0.54	0.91
FlagBirA-PPP1R35_AAA_FIP	NP_536350.2	GNAS	20|18|0|0|0|0|15|16|16|15|11|16	23|16|15|13	67	16.75	0	0.88	0.92
FlagBirA-PPP1R35_AAA_FIP	NP_006487.1	GNAI3	3|3|0|0|0|0|4|5|9|12|0|2	4|9|0|0	13	3.25	0	0.31	0.9
FlagBirA-PPP1R35_AAA_FIP	NP_002061.1	GNAI2	0|0|0|0|0|0|2|3|4|6|0|0	3|3|0|0	6	1.5	0	0.3	0.87
FlagBirA-PPP1R35_AAA_FIP	NP_001646.2	ARCN1	30|27|20|25|25|24|29|30|27|27|21|22	29|25|22|23	99	24.75	0	0.82	0.93
FlagBirA-PPP1R35_AAA_FIP	NP_006112.3	KRT1	26|21|43|38|32|35|19|20|10|8|0|0	6|7|6|9	28	7	0	0.17	0.94
FlagBirA-PPP1R35_AAA_FIP	NP_000537.3	TP53	2|3|0|0|0|0|5|5|11|10|4|2	12|11|3|6	32	8	0	0.76	0.89
FlagBirA-PPP1R35_AAA_FIP	NP_068831.1	JUP	14|12|0|0|0|0|20|20|16|18|31|27	19|19|13|12	63	15.75	0	0.54	0.93
FlagBirA-PPP1R35_AAA_FIP	NP_073153.1	ANAPC1	5|5|0|0|0|0|9|7|11|10|5|4	7|13|7|4	31	7.75	0	0.74	0.89
FlagBirA-PPP1R35_AAA_FIP	NP_001073593.1	CASP8	8|9|0|0|0|0|8|8|19|17|9|12	8|6|5|5	24	6	0	0.33	0.93
FlagBirA-PPP1R35_AAA_FIP	NP_002464.1	MYH9	72|93|0|0|0|0|56|63|103|123|15|12	60|58|54|62	234	58.5	0	0.52	0.94
FlagBirA-PPP1R35_AAA_FIP	NP_001242941.1	MYH10	72|76|0|0|0|0|58|51|126|132|0|0	58|58|36|33	185	46.25	0	0.36	0.94
FlagBirA-PPP1R35_AAA_FIP	NP_056480.1	AAAS	14|15|12|16|15|16|17|16|21|19|17|20	23|27|26|31	107	26.75	0	1.3	0.91
FlagBirA-PPP1R35_AAA_FIP	NP_073716.1	SNRPN	9|9|12|12|11|12|10|10|8|8|7|6	9|8|12|12	41	10.25	0	0.85	0.9
FlagBirA-PPP1R35_AAA_FIP	NP_065953.1	CAMSAP3	5|3|38|33|28|28|0|3|2|2|0|0	9|12|9|9	39	9.75	0	0.27	0.94
FlagBirA-PPP1R35_AAA_FIP	NP_004955.2	HDAC1	0|0|0|0|0|0|11|4|4|3|0|0	16|6|9|14	45	11.25	0	1.5	0.79
FlagBirA-PPP1R35_AAA_FIP	NP_001518.3	HDAC2	9|10|9|4|11|12|18|15|14|16|9|6	13|16|9|9	47	11.75	0	0.69	0.92
FlagBirA-PPP1R35_AAA_FIP	NP_000267.2	OCRL	4|2|5|4|6|4|4|0|0|4|3|6	8|13|7|3	31	7.75	0	1.29	0.75
FlagBirA-PPP1R35_AAA_FIP	NP_078974.1	SLC25A22	0|0|4|4|0|0|0|0|2|0|0|0	2|3|0|0	5	1.25	0	0.31	0.84
FlagBirA-PPP1R35_AAA_FIP	NP_079348.1	PTGES2	7|9|0|0|0|0|11|8|3|5|24|26	9|13|4|6	32	8	0	0.32	0.93
FlagBirA-PPP1R35_AAA_FIP	NP_001076045.1	RBFOX2	0|0|0|0|0|0|2|3|2|4|0|0	6|10|2|0	18	4.5	0.05	1.29	0.64
FlagBirA-PPP1R35_AAA_FIP	NP_071334.1	EGLN1	3|4|0|2|0|0|3|2|5|2|0|0	3|0|0|0	3	0.75	0	0.17	0.86
FlagBirA-PPP1R35_AAA_FIP	NP_112182.1	ANP32E	20|17|9|3|8|7|17|17|18|12|9|8	37|28|18|18	101	25.25	0	1.33	0.88
FlagBirA-PPP1R35_AAA_FIP	NP_112243.1	RAB1B	5|8|18|14|0|0|7|4|15|20|19|19	7|5|11|7	30	7.5	0	0.38	0.93
FlagBirA-PPP1R35_AAA_FIP	NP_114140.4	RAB34	8|12|6|7|0|0|5|11|0|0|12|12	7|9|7|11	34	8.5	0	0.71	0.91
FlagBirA-PPP1R35_AAA_FIP	NP_002861.1	RAB13	6|6|0|0|0|0|8|4|6|9|6|8	7|5|5|7	24	6	0	0.71	0.89
FlagBirA-PPP1R35_AAA_FIP	NP_002860.2	RAB6A	10|10|12|11|16|15|8|11|4|5|6|20	3|4|0|0	7	1.75	0	0.1	0.94
FlagBirA-PPP1R35_AAA_FIP	NP_008835.5	PRKDC	474|477|414|375|400|393|376|366|353|346|353|383	482|482|384|348	1696	424	0	0.89	0.94
FlagBirA-PPP1R35_AAA_FIP	NP_112483.1	LAS1L	5|7|0|0|0|0|8|4|3|6|5|4	33|28|53|37	151	37.75	1	5.03	0
FlagBirA-PPP1R35_AAA_FIP	NP_054829.2	PPP1R8	9|5|0|0|0|0|12|10|9|7|5|5	11|13|6|6	36	9	0	0.82	0.9
FlagBirA-PPP1R35_AAA_FIP	NP_004981.2	MARS	84|78|64|66|66|63|74|77|69|63|63|65	81|77|60|64	282	70.5	0	0.87	0.94
FlagBirA-PPP1R35_AAA_FIP	NP_005959.2	HNRNPM	37|40|46|42|51|51|43|46|55|58|14|16	98|114|78|93	383	95.75	0	1.69	0.92
FlagBirA-PPP1R35_AAA_FIP	NP_114366.1	PCBP2	55|53|18|23|29|34|39|38|48|45|33|31	42|33|46|42	163	40.75	0	0.75	0.94
FlagBirA-PPP1R35_AAA_FIP	NP_006187.2	PCBP1	20|21|10|10|23|16|23|23|15|19|17|20	18|23|15|19	75	18.75	0	0.82	0.92
FlagBirA-PPP1R35_AAA_FIP	NP_006304.1	USP15	15|11|4|4|2|0|14|9|26|25|0|0	14|15|15|15	59	14.75	0	0.58	0.93
FlagBirA-PPP1R35_AAA_FIP	NP_004642.2	USP11	13|12|2|2|0|0|17|17|11|13|5|5	17|21|8|13	59	14.75	0	0.87	0.91
FlagBirA-PPP1R35_AAA_FIP	NP_115882.1	AP1M1	20|27|6|8|6|8|31|32|26|32|25|28	32|25|32|25	114	28.5	0	0.89	0.93
FlagBirA-PPP1R35_AAA_FIP	NP_115914.1	TUBB6	27|21|42|42|43|35|24|22|27|28|27|38	32|35|65|55	187	46.75	0	1.1	0.93
FlagBirA-PPP1R35_AAA_FIP	NP_821080.1	TUBB2B	20|19|34|34|0|0|17|0|0|0|0|0	29|33|0|0	62	15.5	0	0.46	0.93
FlagBirA-PPP1R35_AAA_FIP	NP_821133.1	TUBB	161|175|133|129|135|128|139|131|130|132|174|181	173|124|298|305	900	225	0	1.26	0.94
FlagBirA-PPP1R35_AAA_FIP	NP_006077.2	TUBB3	0|0|9|3|0|0|4|5|6|4|0|4	6|12|5|4	27	6.75	0	0.9	0.84
FlagBirA-PPP1R35_AAA_FIP	NP_006078.2	TUBB4A	0|53|64|68|67|62|32|50|28|29|76|62	51|64|88|90	293	73.25	0	1.02	0.94
FlagBirA-PPP1R35_AAA_FIP	NP_116294.1	RBM17	0|0|6|7|6|5|0|0|0|0|4|3	3|0|2|0	5	1.25	0	0.19	0.89
FlagBirA-PPP1R35_AAA_FIP	NP_955445.1	PRC1	0|0|0|0|0|0|0|0|0|0|0|0	3|0|2|0	5	1.25	0.44	12.5	0.34
FlagBirA-PPP1R35_AAA_FIP	NP_001034679.2	USP9X	30|34|25|15|22|18|28|35|27|32|61|56	75|68|36|40	219	54.75	0	0.94	0.94
FlagBirA-PPP1R35_AAA_FIP	NP_004309.2	ASPH	4|9|0|0|0|0|9|7|0|4|6|8	9|8|0|0	17	4.25	0	0.47	0.89
FlagBirA-PPP1R35_AAA_FIP	NP_116559.1	RECQL	35|42|5|5|0|3|52|57|44|35|25|21	42|45|31|27	145	36.25	0	0.67	0.94
FlagBirA-PPP1R35_AAA_FIP	NP_127492.1	GTF2I	60|51|0|6|7|5|73|79|59|65|62|55	58|61|38|38	195	48.75	0	0.64	0.94
FlagBirA-PPP1R35_AAA_FIP	NP_006717.2	LRBA	4|6|0|0|0|0|6|8|2|8|10|13	7|7|2|0	16	4	0	0.35	0.91
FlagBirA-PPP1R35_AAA_FIP	NP_003321.3	TXNRD1	7|13|0|0|0|0|16|19|15|13|8|11	14|11|6|7	38	9.5	0	0.54	0.92
FlagBirA-PPP1R35_AAA_FIP	NP_004362.2	COPA	66|54|46|46|37|36|93|88|96|90|60|67	99|97|75|76	347	86.75	0	0.92	0.94
FlagBirA-PPP1R35_AAA_FIP	NP_006249.1	PRKG1	0|0|0|0|0|0|0|2|0|0|3|0	12|12|0|2	26	6.5	0.49	2.6	0.27
FlagBirA-PPP1R35_AAA_FIP	NP_001658.2	ARL2	11|15|0|0|0|0|9|15|15|15|14|15	11|16|11|7	45	11.25	0	0.75	0.91
FlagBirA-PPP1R35_AAA_FIP	NP_001091974.1	DDX17	88|76|55|59|50|53|84|81|67|74|83|86	123|97|120|122	462	115.5	0	1.33	0.94
FlagBirA-PPP1R35_AAA_FIP	NP_001180345.1	DDX3X	48|35|24|24|21|22|49|47|70|72|34|40	92|72|84|79	327	81.75	0	1.15	0.94
FlagBirA-PPP1R35_AAA_FIP	NP_004387.1	DDX5	73|77|44|42|44|47|58|60|66|83|49|55	99|85|129|131	444	111	0	1.39	0.93
FlagBirA-PPP1R35_AAA_FIP	NP_003472.2	USP5	37|37|14|11|11|10|61|53|17|18|23|31	26|35|26|18	105	26.25	0	0.46	0.94
FlagBirA-PPP1R35_AAA_FIP	NP_001026884.3	INF2	17|15|8|14|7|11|18|18|15|15|8|7	19|26|0|6	51	12.75	0	0.71	0.91
FlagBirA-PPP1R35_AAA_FIP	NP_001020.2	RPS26	0|5|14|13|16|20|6|4|6|0|6|6	9|0|11|10	30	7.5	0	0.42	0.93
FlagBirA-PPP1R35_AAA_FIP	NP_006258.3	RANBP2	29|37|41|36|38|34|25|25|29|41|38|41	65|53|48|47	213	53.25	0	1.3	0.93
FlagBirA-PPP1R35_AAA_FIP	NP_009207.2	CBX3	0|0|0|0|0|0|4|2|6|5|0|0	7|11|4|3	25	6.25	0	1.14	0.77
FlagBirA-PPP1R35_AAA_FIP	NP_938074.2	PRMT1	4|5|13|7|7|8|5|3|13|10|4|5	16|8|13|11	48	12	0	0.92	0.9
FlagBirA-PPP1R35_AAA_FIP	NP_001093131.1	EIF3CL	17|17|17|17|9|0|15|23|0|0|16|25	19|17|26|24	86	21.5	0	0.9	0.92
FlagBirA-PPP1R35_AAA_FIP	NP_001017963.2	HSP90AA1	307|301|98|97|91|94|293|284|207|232|266|292	212|183|337|370	1102	275.5	0	0.91	0.94
FlagBirA-PPP1R35_AAA_FIP	NP_005900.2	MAP1B	85|90|181|181|182|185|63|60|113|125|3|2	155|147|86|97	485	121.25	0	0.66	0.94
FlagBirA-PPP1R35_AAA_FIP	NP_065922.3	LRCH2	0|0|0|0|0|0|0|0|0|0|0|0	3|3|4|0	10	2.5	0.73	25	0.08
FlagBirA-PPP1R35_AAA_FIP	NP_002939.2	RPL15	11|10|39|41|24|27|9|9|8|10|6|4	14|24|11|13	62	15.5	0	0.39	0.94
FlagBirA-PPP1R35_AAA_FIP	NP_150254.1	RPL13	6|10|27|28|32|31|5|7|7|6|4|4	13|9|14|11	47	11.75	0	0.37	0.94
FlagBirA-PPP1R35_AAA_FIP	NP_006353.2	NXF1	12|9|0|0|0|2|12|7|9|9|9|8	15|16|27|20	78	19.5	0	1.62	0.78
FlagBirA-PPP1R35_AAA_FIP	NP_001093869.1	PDS5A	17|24|2|6|3|4|31|31|20|24|29|30	23|26|21|25	95	23.75	0	0.77	0.93
FlagBirA-PPP1R35_AAA_FIP	NP_001143.2	SLC25A5	23|21|51|52|51|48|34|39|42|37|51|54	33|27|35|46	141	35.25	0	0.67	0.94
FlagBirA-PPP1R35_AAA_FIP	NP_001142.2	SLC25A4	0|0|0|0|4|8|10|12|8|12|3|2	7|8|0|0	15	3.75	0	0.31	0.91
FlagBirA-PPP1R35_AAA_FIP	NP_001627.2	SLC25A6	12|16|22|22|21|0|13|15|14|14|25|23	13|13|17|21	64	16	0	0.67	0.93
FlagBirA-PPP1R35_AAA_FIP	NP_001095867.1	HNRNPR	4|6|17|19|13|16|3|4|8|12|0|2	11|14|12|10	47	11.75	0	0.65	0.92
FlagBirA-PPP1R35_AAA_FIP	NP_258412.1	ITPA	18|15|9|12|17|14|21|21|24|18|13|13	24|17|14|17	72	18	0	0.8	0.92
FlagBirA-PPP1R35_AAA_FIP	NP_000916.2	PDHB	37|33|0|0|0|0|32|22|24|24|24|28	24|30|22|22	98	24.5	0	0.7	0.93
FlagBirA-PPP1R35_AAA_FIP	NP_001096137.1	PSMA4	15|12|43|43|34|36|10|9|8|11|8|7	10|6|23|22	61	15.25	0	0.35	0.94
FlagBirA-PPP1R35_AAA_FIP	NP_000996.2	RPS3	99|103|101|107|104|110|105|94|90|103|135|136	83|90|137|134	444	111	0	0.82	0.94
FlagBirA-PPP1R35_AAA_FIP	NP_005069.2	TLE3	6|5|6|8|4|5|0|3|6|8|7|5	3|5|10|8	26	6.5	0	0.81	0.87
FlagBirA-PPP1R35_AAA_FIP	NP_001098057.1	SLFN11	14|14|8|7|18|16|18|19|20|23|7|8	26|28|16|15	85	21.25	0	0.99	0.92
FlagBirA-PPP1R35_AAA_FIP	NP_004665.2	ASH2L	0|0|0|0|0|0|6|4|2|5|0|0	7|5|0|0	12	3	0	0.55	0.84
FlagBirA-PPP1R35_AAA_FIP	NP_002808.3	PSMD13	33|34|38|36|24|22|40|33|30|26|32|33	29|32|15|16	92	23	0	0.59	0.93
FlagBirA-PPP1R35_AAA_FIP	NP_001002030.1	ECHDC1	9|9|4|3|0|0|18|16|13|21|15|7	9|6|11|8	34	8.5	0	0.44	0.93
FlagBirA-PPP1R35_AAA_FIP	NP_003839.2	SUCLG2	20|19|0|0|0|0|27|23|7|8|23|25	6|7|5|5	23	5.75	0	0.22	0.94
FlagBirA-PPP1R35_AAA_FIP	NP_291024.1	MYL12B	0|10|0|0|0|0|11|14|0|17|4|5	15|15|3|8	41	10.25	0	0.66	0.91
FlagBirA-PPP1R35_AAA_FIP	NP_006301.3	NPEPPS	49|49|7|6|4|4|50|41|24|20|42|51	41|41|36|45	163	40.75	0	0.81	0.94
FlagBirA-PPP1R35_AAA_FIP	NP_001106177.1	SCIN	0|0|0|0|0|0|0|0|0|0|0|0	3|2|0|0	5	1.25	0.44	12.5	0.34
FlagBirA-PPP1R35_AAA_FIP	NP_005974.2	SKP2	5|5|5|5|3|0|7|4|8|7|6|6	8|7|10|6	31	7.75	0	1.03	0.86
FlagBirA-PPP1R35_AAA_FIP	NP_112196.3	TRMT1L	11|11|11|2|6|5|9|7|12|10|8|10	17|20|8|8	53	13.25	0	1.15	0.86
FlagBirA-PPP1R35_AAA_FIP	NP_001106849.1	FANCI	18|20|17|10|6|5|52|36|24|32|25|22	35|41|10|22	108	27	0	0.61	0.94
FlagBirA-PPP1R35_AAA_FIP	NP_005338.1	HSPA5	58|55|59|66|73|80|152|165|128|120|34|38	87|78|91|77	333	83.25	0	0.53	0.94
FlagBirA-PPP1R35_AAA_FIP	NP_001106985.1	ARHGEF7	2|0|0|0|0|0|0|0|0|0|0|0	3|2|0|0	5	1.25	0.04	1.25	0.65
FlagBirA-PPP1R35_AAA_FIP	NP_057110.3	RDH11	5|5|0|0|0|0|2|6|5|4|4|4	6|4|4|4	18	4.5	0	0.82	0.85
FlagBirA-PPP1R35_AAA_FIP	NP_005337.2	HSPA1B	174|162|132|136|153|147|212|215|211|187|135|143	403|385|440|483	1711	427.75	0	2	0.93
FlagBirA-PPP1R35_AAA_FIP	NP_002146.2	HSPA6	15|0|0|0|0|0|0|0|0|8|0|0	21|0|19|25	65	16.25	0	1.41	0.82
FlagBirA-PPP1R35_AAA_FIP	NP_005518.3	HSPA1L	79|71|0|0|0|0|0|0|0|0|0|0	240|206|231|250	927	231.75	1	3.09	0
FlagBirA-PPP1R35_AAA_FIP	NP_078811.3	CORO7	9|6|0|0|0|0|15|0|0|15|4|6	14|0|8|3	25	6.25	0	0.42	0.91
FlagBirA-PPP1R35_AAA_FIP	NP_597680.2	ASNS	71|80|22|17|22|17|126|104|53|60|39|47	74|61|43|32	210	52.5	0	0.46	0.94
FlagBirA-PPP1R35_AAA_FIP	NP_473357.1	SRSF10	0|0|0|0|0|0|0|0|5|5|0|0	3|5|0|0	8	2	0	0.4	0.85
FlagBirA-PPP1R35_AAA_FIP	NP_068593.2	MRPS35	0|0|0|0|0|0|0|0|0|4|0|0	5|8|3|2	18	4.5	0.1	2.25	0.62
FlagBirA-PPP1R35_AAA_FIP	NP_001018864.2	IQCB1	0|0|0|0|0|0|0|0|0|0|0|0	3|0|0|0	3	0.75	0.24	7.5	0.48
FlagBirA-PPP1R35_AAA_FIP	NP_005717.3	TSFM	28|26|4|6|2|0|28|33|35|35|20|16	29|30|24|22	105	26.25	0	0.75	0.93
FlagBirA-PPP1R35_AAA_FIP	NP_510868.1	BCCIP	6|7|3|5|0|0|11|7|6|10|14|13	8|10|10|9	37	9.25	0	0.69	0.91
FlagBirA-PPP1R35_AAA_FIP	NP_478123.1	RAD51C	0|0|0|0|0|0|6|5|8|5|4|2	3|3|4|0	10	2.5	0	0.36	0.89
FlagBirA-PPP1R35_AAA_FIP	NP_055680.3	NCAPD2	23|27|12|11|14|10|40|26|36|36|15|30	32|29|17|24	102	25.5	0	0.67	0.93
FlagBirA-PPP1R35_AAA_FIP	NP_002504.2	NME3	21|13|17|15|15|15|23|21|23|14|10|11	30|30|18|12	90	22.5	0	0.98	0.92
FlagBirA-PPP1R35_AAA_FIP	NP_004887.2	VPS26A	14|15|4|6|7|12|19|25|17|22|17|14	26|19|17|15	77	19.25	0	0.82	0.92
FlagBirA-PPP1R35_AAA_FIP	NP_066299.2	MYL6	14|10|2|0|0|0|11|14|14|18|0|3	18|11|8|10	47	11.75	0	0.73	0.91
FlagBirA-PPP1R35_AAA_FIP	NP_006000.2	TUBA1A	28|33|25|25|30|135|86|96|36|25|135|126	28|26|48|54	156	39	0	0.29	0.94
FlagBirA-PPP1R35_AAA_FIP	NP_536316.1	PTP4A2	0|0|0|0|0|0|0|0|0|0|0|0	2|0|0|0	2	0.5	0.2	5	0.53
FlagBirA-PPP1R35_AAA_FIP	NP_004332.2	CAD	129|123|115|102|97|99|123|123|123|131|92|98	176|148|144|136	604	151	0	1.16	0.94
FlagBirA-PPP1R35_AAA_FIP	NP_001116827.1	PPP6C	0|5|8|8|9|6|0|2|3|3|0|8	9|13|10|11	43	10.75	0	1.26	0.86
FlagBirA-PPP1R35_AAA_FIP	NP_055899.2	MRPS27	9|4|5|7|3|2|3|4|10|11|0|0	11|12|12|11	46	11.5	0	1.1	0.89
FlagBirA-PPP1R35_AAA_FIP	NP_036606.2	UCK2	15|13|4|2|4|3|11|6|18|9|13|14	11|11|19|18	59	14.75	0	0.89	0.91
FlagBirA-PPP1R35_AAA_FIP	NP_001120662.1	CSK	22|14|0|0|0|0|23|21|25|27|13|16	36|34|21|16	107	26.75	0	1.03	0.92
FlagBirA-PPP1R35_AAA_FIP	NP_997192.2	UAP1L1	8|7|0|0|0|0|6|7|7|4|3|3	8|4|0|2	14	3.5	0	0.47	0.88
FlagBirA-PPP1R35_AAA_FIP	NP_277031.1	HK1	57|55|47|66|49|57|49|48|56|46|44|51	57|52|31|40	180	45	0	0.73	0.94
FlagBirA-PPP1R35_AAA_FIP	NP_000180.2	HK2	7|8|10|2|11|0|8|6|19|12|10|18	9|3|5|8	25	6.25	0	0.34	0.94
FlagBirA-PPP1R35_AAA_FIP	NP_001121631.1	VPS53	2|3|0|0|0|0|7|8|7|6|5|5	7|8|5|4	24	6	0	0.8	0.88
FlagBirA-PPP1R35_AAA_FIP	NP_001121689.1	PSIP1	3|4|0|0|0|0|7|6|3|2|3|0	15|13|6|8	42	10.5	0	1.62	0.73
FlagBirA-PPP1R35_AAA_FIP	NP_055768.3	DIS3	15|18|12|12|8|9|25|30|26|29|25|24	23|18|11|11	63	15.75	0	0.53	0.93
FlagBirA-PPP1R35_AAA_FIP	NP_001121699.1	GNE	19|9|0|0|0|0|20|21|17|16|11|10	18|11|12|7	48	12	0	0.59	0.92
FlagBirA-PPP1R35_AAA_FIP	NP_055842.2	PDXDC1	14|15|15|12|11|14|26|21|20|18|13|16	16|17|9|15	57	14.25	0	0.61	0.93
FlagBirA-PPP1R35_AAA_FIP	NP_001121901.1	SMARCAD1	3|0|0|0|0|0|2|3|4|5|7|4	10|6|4|6	26	6.5	0	1.08	0.82
FlagBirA-PPP1R35_AAA_FIP	NP_597700.1	GPT2	4|3|0|0|0|0|5|5|2|0|0|0	3|0|0|2	5	1.25	0	0.25	0.87
FlagBirA-PPP1R35_AAA_FIP	NP_001122316.1	SMARCA4	2|0|0|2|2|2|0|0|5|4|0|0	6|19|4|8	37	9.25	0.25	2.06	0.44
FlagBirA-PPP1R35_AAA_FIP	NP_056175.3	SKIV2L2	50|44|4|3|0|0|47|42|37|39|45|49	37|35|29|34	135	33.75	0	0.68	0.94
FlagBirA-PPP1R35_AAA_FIP	NP_055414.2	MAGED2	6|10|5|6|4|7|15|20|12|10|2|5	40|45|55|54	194	48.5	0.53	2.77	0.15
FlagBirA-PPP1R35_AAA_FIP	NP_002085.2	GSPT1	10|9|0|0|3|0|23|17|16|17|12|13	11|14|11|11	47	11.75	0	0.59	0.93
FlagBirA-PPP1R35_AAA_FIP	NP_001123520.1	DOCK9	0|0|0|0|0|0|0|0|0|0|0|0	2|0|0|0	2	0.5	0.2	5	0.53
FlagBirA-PPP1R35_AAA_FIP	NP_001123527.1	EEF1D	10|11|8|6|3|4|12|11|12|0|13|10	11|12|7|0	30	7.5	0	0.6	0.91
FlagBirA-PPP1R35_AAA_FIP	NP_598001.1	NEK7	0|4|0|0|0|0|2|3|0|0|4|2	3|4|3|3	13	3.25	0	0.81	0.83
FlagBirA-PPP1R35_AAA_FIP	NP_001123561.1	KARS	30|26|5|6|4|2|43|46|36|23|26|30	20|20|28|29	97	24.25	0	0.54	0.94
FlagBirA-PPP1R35_AAA_FIP	NP_853556.2	RFC5	21|21|10|12|12|10|25|26|13|15|16|21	24|26|16|18	84	21	0	0.82	0.93
FlagBirA-PPP1R35_AAA_FIP	NP_001123630.1	MYO1B	19|24|0|0|0|0|27|19|28|23|21|22	36|36|14|14	100	25	0	0.91	0.92
FlagBirA-PPP1R35_AAA_FIP	NP_056009.1	MYO1D	2|0|0|0|0|0|2|0|2|0|0|0	6|7|0|0	13	3.25	0.15	1.62	0.6
FlagBirA-PPP1R35_AAA_FIP	NP_001123892.1	SMARCC2	3|0|0|0|0|0|4|0|5|3|0|0	13|15|0|2	30	7.5	0.29	1.67	0.41
FlagBirA-PPP1R35_AAA_FIP	NP_001124150.1	EIF4E	12|9|0|0|0|0|12|11|6|10|8|6	11|14|7|6	38	9.5	0	0.79	0.9
FlagBirA-PPP1R35_AAA_FIP	NP_001127917.1	DDAH1	5|8|0|0|0|0|7|8|6|5|16|15	5|5|16|9	35	8.75	0	0.56	0.91
FlagBirA-PPP1R35_AAA_FIP	NP_001128230.1	ARFRP1	2|0|0|0|0|0|7|6|4|0|0|0	6|6|0|0	12	3	0	0.46	0.87
FlagBirA-PPP1R35_AAA_FIP	NP_002970.2	SCP2	3|4|0|0|0|0|2|2|2|3|5|5	2|5|2|0	9	2.25	0	0.45	0.85
FlagBirA-PPP1R35_AAA_FIP	NP_005403.2	SHMT2	40|37|21|14|28|27|33|25|17|14|10|10	30|24|35|51	140	35	0	0.91	0.93
FlagBirA-PPP1R35_AAA_FIP	NP_115756.2	GFM2	3|0|0|0|0|0|5|4|0|0|0|0	2|6|0|0	8	2	0	0.44	0.82
FlagBirA-PPP1R35_AAA_FIP	NP_612453.1	KCTD12	13|14|0|0|0|0|11|14|6|9|4|4	5|5|10|5	25	6.25	0	0.45	0.92
FlagBirA-PPP1R35_AAA_FIP	NP_004312.2	KIF1A	5|0|6|5|4|2|5|5|8|12|7|4	11|14|11|18	54	13.5	0	1.35	0.84
FlagBirA-PPP1R35_AAA_FIP	NP_056069.2	KIF13B	0|0|0|0|0|0|0|0|0|0|0|0	2|0|0|0	2	0.5	0.2	5	0.53
FlagBirA-PPP1R35_AAA_FIP	NP_005667.2	RBM10	19|22|87|90|97|98|19|16|47|45|0|0	63|56|31|36	186	46.5	0	0.48	0.94
FlagBirA-PPP1R35_AAA_FIP	NP_057321.2	ANAPC5	5|5|0|0|0|0|0|3|6|6|0|3	8|6|3|0	17	4.25	0	0.71	0.84
FlagBirA-PPP1R35_AAA_FIP	NP_036272.2	SLC25A10	0|0|0|0|2|0|0|0|2|3|0|0	2|2|0|0	4	1	0	0.4	0.79
FlagBirA-PPP1R35_AAA_FIP	NP_057665.2	ECSIT	0|0|0|0|0|0|0|0|0|0|0|0	3|2|0|0	5	1.25	0.44	12.5	0.34
FlagBirA-PPP1R35_AAA_FIP	NP_001128471.1	FERMT2	0|3|0|0|0|0|2|6|10|12|4|3	8|9|5|3	25	6.25	0	0.57	0.91
FlagBirA-PPP1R35_AAA_FIP	NP_613075.1	H2AFY	0|0|0|0|0|0|0|0|13|12|0|0	5|3|3|0	11	2.75	0	0.22	0.92
FlagBirA-PPP1R35_AAA_FIP	NP_002047.2	GFPT1	39|38|0|0|0|0|37|43|28|31|18|18	17|20|10|8	55	13.75	0	0.34	0.94
FlagBirA-PPP1R35_AAA_FIP	NP_004073.2	DCTN1	21|16|15|20|12|13|19|23|21|23|18|13	21|31|17|15	84	21	0	0.91	0.92
FlagBirA-PPP1R35_AAA_FIP	NP_001128647.1	NEDD1	0|0|0|0|0|0|2|5|0|0|3|0	5|5|0|0	10	2.5	0	0.62	0.81
FlagBirA-PPP1R35_AAA_FIP	NP_001128714.1	NDRG1	46|45|10|11|12|10|39|41|29|28|41|45	22|16|17|12	67	16.75	0	0.37	0.94
FlagBirA-PPP1R35_AAA_FIP	NP_112598.2	EPPK1	71|78|12|12|15|14|97|99|81|80|110|104	81|98|48|33	260	65	0	0.61	0.94
FlagBirA-PPP1R35_AAA_FIP	NP_001129123.1	EIF2AK2	4|5|10|8|8|7|9|9|9|8|6|7	25|22|5|0	52	13	0.04	1.37	0.65
FlagBirA-PPP1R35_AAA_FIP	NP_055484.3	NUP93	50|43|23|25|17|14|50|52|55|64|70|71	65|53|46|50	214	53.5	0	0.76	0.94
FlagBirA-PPP1R35_AAA_FIP	NP_001129293.1	FDPS	20|19|5|5|5|3|18|19|10|10|15|19	19|18|15|15	67	16.75	0	0.86	0.92
FlagBirA-PPP1R35_AAA_FIP	NP_001129409.1	SMAD2	0|0|0|0|0|0|0|4|2|6|3|0	6|0|0|0	6	1.5	0	0.3	0.84
FlagBirA-PPP1R35_AAA_FIP	NP_001129477.1	GART	158|152|9|15|7|12|177|163|172|154|134|131	115|95|90|110	410	102.5	0	0.59	0.94
FlagBirA-PPP1R35_AAA_FIP	NP_060856.2	PCID2	10|12|0|3|0|2|14|15|13|11|8|7	23|15|16|11	65	16.25	0	1.12	0.89
FlagBirA-PPP1R35_AAA_FIP	NP_060090.2	ILF3	20|24|44|40|40|38|19|18|21|26|30|28	42|55|57|58	212	53	0	1.26	0.93
FlagBirA-PPP1R35_AAA_FIP	NP_060857.2	STRBP	0|0|0|0|0|0|0|0|0|0|0|0	2|0|2|0	4	1	0.39	10	0.36
FlagBirA-PPP1R35_AAA_FIP	NP_644670.1	EHD4	6|6|0|0|0|0|6|11|18|19|9|10	9|16|8|10	43	10.75	0	0.58	0.92
FlagBirA-PPP1R35_AAA_FIP	NP_004586.2	SMS	9|7|6|3|4|3|11|13|8|10|9|11	12|12|4|0	28	7	0	0.58	0.9
FlagBirA-PPP1R35_AAA_FIP	NP_057404.2	NUP98	19|19|0|0|0|0|18|22|14|22|20|23	22|24|13|12	71	17.75	0	0.79	0.92
FlagBirA-PPP1R35_AAA_FIP	NP_631946.1	NAP1L1	16|15|18|22|20|21|18|30|25|29|10|11	33|34|36|23	126	31.5	0	1.07	0.93
FlagBirA-PPP1R35_AAA_FIP	NP_003553.2	SLC25A11	9|8|18|16|14|13|20|14|31|33|6|7	22|18|15|11	66	16.5	0	0.52	0.93
FlagBirA-PPP1R35_AAA_FIP	NP_001440.2	FHL1	9|6|2|5|0|0|9|10|10|9|9|10	8|10|9|8	35	8.75	0	0.88	0.9
FlagBirA-PPP1R35_AAA_FIP	NP_000692.2	ATP1A1	39|44|83|92|83|76|55|61|82|81|36|40	59|48|26|27	160	40	0	0.46	0.94
FlagBirA-PPP1R35_AAA_FIP	NP_036382.2	RRAS2	0|0|0|0|0|0|0|0|0|0|2|2	2|0|0|0	2	0.5	0	0.25	0.77
FlagBirA-PPP1R35_AAA_FIP	NP_060238.3	LRRC40	14|11|0|0|0|0|14|17|9|14|20|13	8|10|12|15	45	11.25	0	0.61	0.92
FlagBirA-PPP1R35_AAA_FIP	NP_006612.2	AHCYL1	7|5|0|0|0|0|4|7|4|9|5|9	6|9|11|12	38	9.5	0	1.06	0.88
FlagBirA-PPP1R35_AAA_FIP	NP_060918.2	CAND1	142|133|99|102|97|99|134|123|104|86|85|92	110|106|75|84	375	93.75	0	0.68	0.94
FlagBirA-PPP1R35_AAA_FIP	NP_001155971.1	CAND2	6|6|0|0|0|0|8|7|8|7|14|16	7|6|0|0	13	3.25	0	0.22	0.92
FlagBirA-PPP1R35_AAA_FIP	NP_061322.2	MATR3	60|65|28|24|15|21|75|81|75|90|73|66	99|101|107|105	412	103	0	1.2	0.94
FlagBirA-PPP1R35_AAA_FIP	NP_001137232.1	EIF5A	42|50|33|35|40|39|69|56|44|45|48|55	39|48|52|47	186	46.5	0	0.74	0.94
FlagBirA-PPP1R35_AAA_FIP	NP_001137357.1	PPP1R12A	0|0|0|0|0|0|2|0|2|3|0|0	5|6|6|0	17	4.25	0.02	1.7	0.67
FlagBirA-PPP1R35_AAA_FIP	NP_057001.1	GSTK1	5|7|0|2|0|0|13|12|5|2|10|13	4|4|8|3	19	4.75	0	0.37	0.92
FlagBirA-PPP1R35_AAA_FIP	NP_037506.2	PDCD6IP	47|47|0|0|2|0|51|57|37|45|40|37	50|33|34|30	147	36.75	0	0.68	0.94
FlagBirA-PPP1R35_AAA_FIP	NP_065812.1	RPTOR	15|15|3|4|3|4|6|9|0|4|5|7	13|17|10|7	47	11.75	0	0.78	0.91
FlagBirA-PPP1R35_AAA_FIP	NP_665875.1	ANXA11	12|15|0|0|0|0|6|7|12|15|7|7	19|14|5|5	43	10.75	0	0.72	0.91
FlagBirA-PPP1R35_AAA_FIP	NP_665877.1	GSTZ1	0|0|0|0|0|0|7|0|6|6|0|0	6|7|0|0	13	3.25	0	0.5	0.87
FlagBirA-PPP1R35_AAA_FIP	NP_665811.1	AIFM1	32|26|25|28|27|26|34|27|30|29|29|33	25|35|24|20	104	26	0	0.78	0.93
FlagBirA-PPP1R35_AAA_FIP	NP_001138392.1	TTC26	0|0|0|0|0|0|0|0|0|0|0|0	2|0|0|0	2	0.5	0.2	5	0.53
FlagBirA-PPP1R35_AAA_FIP	NP_001138384.1	ATG7	8|8|0|0|0|0|18|11|8|8|2|5	6|7|0|0	13	3.25	0	0.22	0.92
FlagBirA-PPP1R35_AAA_FIP	NP_001138630.1	HBS1L	7|6|0|0|0|3|3|4|9|4|4|5	9|7|6|6	28	7	0	0.88	0.88
FlagBirA-PPP1R35_AAA_FIP	NP_006004.2	RPL10	9|10|14|13|9|0|5|7|11|9|6|8	22|20|30|17	89	22.25	0	1.65	0.79
FlagBirA-PPP1R35_AAA_FIP	NP_001138880.1	NONO	20|18|13|11|9|7|24|17|15|18|11|15	24|18|25|27	94	23.5	0	1.07	0.92
FlagBirA-PPP1R35_AAA_FIP	NP_001138908.1	LSS	8|7|0|0|0|0|14|13|6|8|5|4	4|4|0|2	10	2.5	0	0.19	0.94
FlagBirA-PPP1R35_AAA_FIP	NP_001138915.1	PFKFB3	4|0|22|22|23|28|7|3|0|6|0|0	10|0|0|0	10	2.5	0	0.1	0.93
FlagBirA-PPP1R35_AAA_FIP	NP_001139110.1	GPSM1	5|2|0|0|0|0|0|4|0|0|0|0	13|10|0|0	23	5.75	0.08	1.28	0.62
FlagBirA-PPP1R35_AAA_FIP	NP_001139247.1	FKBP5	24|12|20|16|12|13|28|22|17|19|9|11	24|26|11|12	73	18.25	0	0.7	0.93
FlagBirA-PPP1R35_AAA_FIP	NP_671717.1	FBXO22	14|13|0|0|0|0|20|17|9|7|8|3	7|4|9|3	23	5.75	0	0.31	0.93
FlagBirA-PPP1R35_AAA_FIP	NP_001139686.1	TBC1D15	8|4|6|6|0|2|5|8|3|3|6|5	3|6|8|3	20	5	0	0.62	0.89
FlagBirA-PPP1R35_AAA_FIP	NP_003636.2	SLC27A2	0|2|0|0|0|0|9|7|5|2|3|4	7|9|0|0	16	4	0	0.5	0.88
FlagBirA-PPP1R35_AAA_FIP	NP_006363.4	SYNCRIP	8|11|53|54|46|46|8|10|11|9|3|0	19|19|17|18	73	18.25	0	0.34	0.94
FlagBirA-PPP1R35_AAA_FIP	NP_000840.2	GSTM3	8|10|0|0|0|0|15|13|20|18|6|6	12|11|9|7	39	9.75	0	0.51	0.93
FlagBirA-PPP1R35_AAA_FIP	NP_683759.1	NSUN5	0|0|0|0|0|0|0|0|0|3|0|0	4|4|0|0	8	2	0.04	1.33	0.65
FlagBirA-PPP1R35_AAA_FIP	NP_003644.2	COPS3	3|0|5|4|0|0|13|14|8|11|0|3	10|10|0|0	20	5	0	0.37	0.92
FlagBirA-PPP1R35_AAA_FIP	NP_073591.2	SFXN1	5|3|7|4|0|3|12|11|32|34|3|0	9|8|8|7	32	8	0	0.24	0.94
FlagBirA-PPP1R35_AAA_FIP	NP_001155059.1	GYS1	14|14|10|15|7|9|12|8|11|11|27|24	18|20|15|15	68	17	0	0.67	0.93
FlagBirA-PPP1R35_AAA_FIP	NP_002963.2	SBF1	0|3|0|0|0|0|0|2|2|4|5|0	7|12|4|7	30	7.5	0.03	1.67	0.66
FlagBirA-PPP1R35_AAA_FIP	NP_002267.2	KRT19	9|6|6|7|7|4|8|5|9|7|2|3	17|16|19|20	72	18	0	2	0.76
FlagBirA-PPP1R35_AAA_FIP	NP_954657.1	KRT18	22|19|10|16|9|7|22|14|19|16|4|3	30|27|25|21	103	25.75	0	1.17	0.92
FlagBirA-PPP1R35_AAA_FIP	NP_055423.1	CYFIP1	22|30|0|0|0|0|23|29|23|23|30|27	29|35|17|27	108	27	0	0.9	0.93
FlagBirA-PPP1R35_AAA_FIP	NP_001032409.2	CYFIP2	16|15|0|0|0|0|14|21|12|16|23|22	16|20|11|0	47	11.75	0	0.52	0.93
FlagBirA-PPP1R35_AAA_FIP	NP_705618.1	NUP155	45|44|29|20|20|20|45|41|47|50|57|63	49|47|48|48	192	48	0	0.8	0.94
FlagBirA-PPP1R35_AAA_FIP	NP_002796.4	PSMC5	64|57|37|38|42|37|67|74|77|66|52|63	57|56|50|57	220	55	0	0.73	0.94
FlagBirA-PPP1R35_AAA_FIP	NP_055045.2	SRP68	15|18|4|5|5|5|20|21|26|24|16|14	41|37|23|19	120	30	0	1.2	0.91
FlagBirA-PPP1R35_AAA_FIP	NP_733765.1	ATP2A2	26|30|60|53|58|56|23|29|78|73|16|10	62|45|29|40	176	44	0	0.58	0.94
FlagBirA-PPP1R35_AAA_FIP	NP_733935.1	MRPL11	0|0|0|0|0|0|0|2|2|3|0|0	6|5|2|2	15	3.75	0.01	1.5	0.69
FlagBirA-PPP1R35_AAA_FIP	NP_001157632.1	PPP6R3	14|11|9|8|2|3|10|12|13|12|11|9	22|22|19|22	85	21.25	0	1.57	0.88
FlagBirA-PPP1R35_AAA_FIP	NP_001157717.1	C1orf27	2|4|2|3|3|2|3|0|3|2|0|0	5|7|3|3	18	4.5	0	1.29	0.74
FlagBirA-PPP1R35_AAA_FIP	NP_733779.1	SKP1	2|0|5|5|5|5|5|4|5|0|0|0	2|2|3|5	12	3	0	0.6	0.85
FlagBirA-PPP1R35_AAA_FIP	NP_001158275.1	RBMX	5|5|12|17|18|16|3|2|9|7|0|0	9|8|12|11	40	10	0	0.57	0.92
FlagBirA-PPP1R35_AAA_FIP	NP_001128711.1	LDHA	18|17|0|3|0|0|22|20|19|17|18|23	15|12|10|16	53	13.25	0	0.59	0.93
FlagBirA-PPP1R35_AAA_FIP	NP_001159477.1	EPB41	0|3|0|0|0|0|4|3|2|0|0|0	7|4|0|0	11	2.75	0	0.79	0.75
FlagBirA-PPP1R35_AAA_FIP	NP_078888.4	DHX40	6|5|2|0|0|0|8|4|11|10|0|0	11|11|6|6	34	8.5	0	0.81	0.9
FlagBirA-PPP1R35_AAA_FIP	NP_001108585.2	WDR26	0|3|3|0|0|4|4|4|4|3|0|0	9|6|0|4	19	4.75	0	1.19	0.73
FlagBirA-PPP1R35_AAA_FIP	NP_001213.2	CAMK2G	0|0|0|0|0|0|2|4|2|0|2|0	10|4|3|3	20	5	0.14	1.67	0.61
FlagBirA-PPP1R35_AAA_FIP	NP_742112.1	CAMK2D	9|9|0|0|0|0|4|5|7|5|6|9	6|8|3|8	25	6.25	0	0.69	0.89
FlagBirA-PPP1R35_AAA_FIP	NP_002473.2	NASP	18|17|0|0|0|0|15|17|7|14|13|14	10|9|5|4	28	7	0	0.4	0.93
FlagBirA-PPP1R35_AAA_FIP	NP_064504.2	ZC3HAV1	8|5|5|4|6|4|5|3|8|11|0|0	13|10|11|12	46	11.5	0	1.21	0.88
FlagBirA-PPP1R35_AAA_FIP	NP_775885.1	NOMO2	2|5|4|4|8|12|5|6|10|17|6|10	9|5|0|2	16	4	0	0.28	0.92
FlagBirA-PPP1R35_AAA_FIP	NP_068751.4	RIC8A	17|12|8|5|0|3|13|14|9|15|13|12	10|14|4|6	34	8.5	0	0.53	0.92
FlagBirA-PPP1R35_AAA_FIP	NP_001164014.1	PGAM5	4|3|17|13|2|18|4|5|6|6|6|3	10|8|8|11	37	9.25	0	0.53	0.92
FlagBirA-PPP1R35_AAA_FIP	NP_008830.2	IDH3B	20|22|3|2|0|3|25|29|20|12|23|27	15|21|12|13	61	15.25	0	0.54	0.93
FlagBirA-PPP1R35_AAA_FIP	NP_071901.2	RAB3IP	0|0|0|0|0|0|0|0|0|0|0|0	5|4|0|0	9	2.25	0.5	22.5	0.24
FlagBirA-PPP1R35_AAA_FIP	NP_443111.4	LARP4	0|0|0|0|0|0|5|6|6|7|2|0	10|5|0|12	27	6.75	0	1.04	0.8
FlagBirA-PPP1R35_AAA_FIP	NP_001164006.1	ATAD3A	16|7|18|22|12|13|10|6|25|21|14|7	24|32|25|20	101	25.25	0	1.07	0.92
FlagBirA-PPP1R35_AAA_FIP	NP_001409.3	EIF4G2	18|15|31|28|18|21|23|31|46|45|12|19	54|46|43|40	183	45.75	0	1.01	0.93
FlagBirA-PPP1R35_AAA_FIP	NP_001307.2	CSE1L	112|113|70|70|78|84|138|154|87|88|103|116	66|66|56|68	256	64	0	0.44	0.94
FlagBirA-PPP1R35_AAA_FIP	NP_001166925.1	PDHA1	28|28|0|0|0|0|28|34|26|33|26|35	30|33|34|34	131	32.75	0	0.95	0.93
FlagBirA-PPP1R35_AAA_FIP	NP_789845.1	PPA2	0|0|0|0|0|0|9|0|0|0|0|0	9|4|0|0	13	3.25	0	0.72	0.75
FlagBirA-PPP1R35_AAA_FIP	NP_808227.1	CSNK2A1	0|0|0|0|0|0|5|5|5|5|0|2	8|9|8|7	32	8	0	1.6	0.78
FlagBirA-PPP1R35_AAA_FIP	NP_001171629.1	UGDH	16|14|0|0|0|0|19|17|15|16|9|11	15|13|6|9	43	10.75	0	0.6	0.92
FlagBirA-PPP1R35_AAA_FIP	NP_065142.2	MRPL47	0|0|0|0|0|0|0|0|0|0|0|0	4|3|0|0	7	1.75	0.49	17.5	0.28
FlagBirA-PPP1R35_AAA_FIP	NP_001177645.1	DNM2	26|23|2|0|0|0|17|18|5|2|25|18	8|10|13|10	41	10.25	0	0.4	0.93
FlagBirA-PPP1R35_AAA_FIP	NP_006787.2	AFG3L2	3|2|10|8|12|7|7|7|11|11|3|0	6|4|5|5	20	5	0	0.43	0.94
FlagBirA-PPP1R35_AAA_FIP	NP_001191332.1	ANK3	3|0|0|0|0|0|0|3|0|0|0|0	3|2|0|0	5	1.25	0	0.42	0.8
FlagBirA-PPP1R35_AAA_FIP	NP_001180201.1	RBBP5	4|6|0|0|0|0|9|5|10|8|0|2	7|6|4|3	20	5	0	0.53	0.9
FlagBirA-PPP1R35_AAA_FIP	NP_001180424.1	ADAR	41|42|14|11|10|11|34|52|38|35|44|35	58|75|42|54	229	57.25	0	1.19	0.93
FlagBirA-PPP1R35_AAA_FIP	NP_886553.3	EIF4G1	38|39|40|36|27|27|41|33|45|39|22|23	37|27|25|25	114	28.5	0	0.66	0.94
FlagBirA-PPP1R35_AAA_FIP	NP_001182027.1	ANKRD28	0|0|3|3|0|0|2|0|3|0|2|0	11|10|0|0	21	5.25	0.34	1.75	0.4
FlagBirA-PPP1R35_AAA_FIP	NP_006538.2	IGF2BP3	8|11|9|9|5|4|13|10|7|12|0|4	20|17|10|10	57	14.25	0	1.14	0.88
FlagBirA-PPP1R35_AAA_FIP	NP_001184222.1	DPYSL2	14|9|4|0|0|0|12|14|5|7|15|14	2|4|15|8	29	7.25	0	0.5	0.91
FlagBirA-PPP1R35_AAA_FIP	NP_001185808.1	ATP5J2-PTCD1	12|9|9|9|11|11|13|10|15|14|5|6	10|14|8|2	34	8.5	0	0.59	0.91
FlagBirA-PPP1R35_AAA_FIP	NP_001186269.1	RPL17	15|15|26|26|39|37|14|14|20|17|11|10	25|26|27|29	107	26.75	0	0.7	0.93
FlagBirA-PPP1R35_AAA_FIP	NP_001186600.1	CALU	49|42|49|48|42|40|46|49|34|40|34|32	21|43|50|37	151	37.75	0	0.77	0.94
FlagBirA-PPP1R35_AAA_FIP	NP_001186738.1	INTS7	0|0|0|0|0|0|3|3|5|3|4|6	4|7|2|6	19	4.75	0	0.86	0.84
FlagBirA-PPP1R35_AAA_FIP	NP_009194.2	COPE	31|24|4|7|3|5|32|34|28|30|21|21	33|27|22|29	111	27.75	0	0.84	0.93
FlagBirA-PPP1R35_AAA_FIP	NP_001135822.1	THOC6	17|17|17|12|16|17|13|8|18|15|23|22	22|24|16|13	75	18.75	0	0.83	0.92
FlagBirA-PPP1R35_AAA_FIP	NP_001061.2	TUBG1	20|14|7|9|5|3|15|14|14|18|21|28	26|23|16|22	87	21.75	0	0.89	0.93
FlagBirA-PPP1R35_AAA_FIP	NP_852136.1	RFC2	21|16|10|11|11|13|14|12|13|13|5|7	19|16|17|17	69	17.25	0	0.93	0.92
FlagBirA-PPP1R35_AAA_FIP	NP_001186846.1	PGM3	45|42|5|5|5|5|42|48|34|28|29|44	31|38|36|26	131	32.75	0	0.7	0.94
FlagBirA-PPP1R35_AAA_FIP	NP_001186883.1	ACTG1	109|119|15|12|28|29|0|104|101|72|124|111	74|76|114|128	392	98	0	0.81	0.94
FlagBirA-PPP1R35_AAA_FIP	NP_001188306.1	ALDH7A1	41|44|0|0|0|0|57|59|32|32|38|39	24|28|14|13	79	19.75	0	0.34	0.94
FlagBirA-PPP1R35_AAA_FIP	NP_001189360.1	PRDX1	0|0|12|12|6|8|0|0|2|0|0|0	2|0|0|0	2	0.5	0	0.04	0.94
FlagBirA-PPP1R35_AAA_FIP	NP_001190174.1	RPS10	41|45|23|23|14|15|55|41|51|42|31|32	46|45|51|50	192	48	0	0.91	0.94
FlagBirA-PPP1R35_AAA_FIP	NP_858058.1	OGT	0|8|0|0|0|3|9|6|7|10|7|12	2|2|9|9	22	5.5	0	0.5	0.91
FlagBirA-PPP1R35_AAA_FIP	NP_116021.2	PAPOLA	8|7|0|0|0|0|10|13|10|8|3|3	2|5|3|0	10	2.5	0	0.22	0.94
FlagBirA-PPP1R35_AAA_FIP	NP_863654.1	ACOT7	56|53|27|27|23|23|59|72|61|53|56|68	54|54|52|43	203	50.75	0	0.72	0.94
FlagBirA-PPP1R35_AAA_FIP	NP_003592.3	SMARCA5	2|3|0|0|0|0|4|0|10|9|0|0	15|9|4|5	33	8.25	0	0.87	0.86
FlagBirA-PPP1R35_AAA_FIP	NP_001193867.1	FAM115A	0|0|0|0|0|0|16|15|12|13|15|16	8|9|11|12	40	10	0	0.62	0.92
FlagBirA-PPP1R35_AAA_FIP	NP_002645.3	PKM2	449|447|126|148|187|180|106|305|88|285|180|210	95|274|118|515	1002	250.5	0	0.56	0.94
FlagBirA-PPP1R35_AAA_FIP	NP_001193937.1	MLLT4	7|4|7|5|4|0|8|5|3|7|7|4	4|9|3|0	16	4	0	0.53	0.87
FlagBirA-PPP1R35_AAA_FIP	NP_055912.2	CLASP2	7|12|23|27|21|27|7|11|7|6|4|2	10|6|2|6	24	6	0	0.22	0.94
FlagBirA-PPP1R35_AAA_FIP	NP_078837.3	NAA16	0|0|0|0|0|0|0|0|3|3|0|0	8|8|0|2	18	4.5	0.05	1.5	0.65
FlagBirA-PPP1R35_AAA_FIP	NP_001229236.1	PITRM1	42|35|0|0|0|0|40|30|15|20|47|45	22|19|15|13	69	17.25	0	0.38	0.94
FlagBirA-PPP1R35_AAA_FIP	NP_877423.1	MCM4	66|53|4|6|4|8|80|76|83|85|63|68	75|79|76|65	295	73.75	0	0.88	0.94
FlagBirA-PPP1R35_AAA_FIP	NP_057190.2	SCFD1	25|26|5|2|0|0|48|50|36|39|38|31	37|34|39|30	140	35	0	0.71	0.94
FlagBirA-PPP1R35_AAA_FIP	NP_005907.3	MCM7	104|107|47|48|63|54|93|106|122|116|98|104	142|127|132|123	524	131	0	1.1	0.94
FlagBirA-PPP1R35_AAA_FIP	NP_001229696.1	MTHFD1L	26|25|33|42|31|31|30|23|21|17|31|31	35|29|24|23	111	27.75	0	0.74	0.93
FlagBirA-PPP1R35_AAA_FIP	NP_056311.2	KIAA1429	4|2|0|0|0|0|5|4|8|5|0|3	12|11|4|7	34	8.5	0	1.31	0.8
FlagBirA-PPP1R35_AAA_FIP	NP_001229971.1	HLA-C	0|3|3|0|8|7|10|7|7|7|9|4	5|4|2|4	15	3.75	0	0.39	0.94
FlagBirA-PPP1R35_AAA_FIP	NP_001230076.1	NVL	3|6|0|0|0|0|5|8|11|12|9|9	15|12|8|9	44	11	0	0.96	0.89
FlagBirA-PPP1R35_AAA_FIP	NP_899195.1	SEC13	8|8|3|0|0|0|12|9|10|15|7|9	6|12|7|7	32	8	0	0.59	0.91
FlagBirA-PPP1R35_AAA_FIP	NP_001165694.1	MOB2	6|7|11|12|19|16|7|7|9|9|0|2	7|6|14|10	37	9.25	0	0.53	0.92
FlagBirA-PPP1R35_AAA_FIP	NP_477352.3	PI4KA	5|3|0|0|0|2|11|14|6|11|12|7	8|8|4|2	22	5.5	0	0.42	0.92
FlagBirA-PPP1R35_AAA_FIP	NP_062538.5	RNF20	4|6|0|0|0|0|5|3|8|5|0|0	5|4|8|8	25	6.25	0	0.89	0.87
FlagBirA-PPP1R35_AAA_FIP	NP_001238968.1	RAB5C	4|3|19|18|10|26|6|7|8|4|8|6	4|5|7|0	16	4	0	0.18	0.94
FlagBirA-PPP1R35_AAA_FIP	NP_001243194.1	FLII	0|0|2|0|0|0|0|0|2|0|2|0	3|5|4|5	17	4.25	0.03	2.12	0.66
FlagBirA-PPP1R35_AAA_FIP	NP_006448.4	PDLIM5	6|0|0|0|0|0|11|9|9|12|9|6	9|11|5|3	28	7	0	0.61	0.9
FlagBirA-PPP1R35_AAA_FIP	NP_001243546.1	TUBGCP2	16|13|8|14|9|8|24|21|20|18|16|11	29|24|15|16	84	21	0	0.93	0.92
FlagBirA-PPP1R35_AAA_FIP	NP_001243607.1	KIAA0391	3|3|0|0|0|0|0|0|0|2|0|0	3|7|6|4	20	5	0.01	1.67	0.71
FlagBirA-PPP1R35_AAA_FIP	NP_932157.1	PHC2	0|0|0|0|0|0|0|0|0|0|0|0	2|6|0|0	8	2	0.45	20	0.32
FlagBirA-PPP1R35_AAA_FIP	NP_065741.3	ANKHD1-EIF4EBP3	3|0|2|2|0|0|0|4|6|9|2|0	10|12|7|9	38	9.5	0	1.27	0.84
FlagBirA-PPP1R35_AAA_FIP	NP_115593.3	ANKRD17	0|2|0|2|3|2|8|7|11|9|2|6	10|8|0|0	18	4.5	0	0.45	0.9
FlagBirA-PPP1R35_AAA_FIP	NP_001243654.1	USP39	2|6|12|10|14|15|0|4|6|7|6|0	14|19|14|12	59	14.75	0	1.02	0.9
FlagBirA-PPP1R35_AAA_FIP	NP_937818.1	NME1	3|4|13|7|10|6|3|2|2|2|4|2	3|2|0|3	8	2	0	0.17	0.94
FlagBirA-PPP1R35_AAA_FIP	NP_001244127.1	CUL3	6|6|0|2|0|0|10|11|3|3|5|6	6|4|6|3	19	4.75	0	0.45	0.91
FlagBirA-PPP1R35_AAA_FIP	NP_001410.2	ELAVL1	22|18|8|0|3|5|23|32|16|21|23|22	38|27|34|30	129	32.25	0	1.17	0.92
FlagBirA-PPP1R35_AAA_FIP	NP_057213.2	COPS4	12|10|5|2|2|4|14|21|7|5|6|8	11|10|4|0	25	6.25	0	0.36	0.92
FlagBirA-PPP1R35_AAA_FIP	NP_006421.2	CCT4	147|163|138|134|135|128|127|141|137|146|104|103	141|121|136|142	540	135	0	0.87	0.94
FlagBirA-PPP1R35_AAA_FIP	NP_001245200.1	MLH1	0|2|0|0|0|2|9|7|4|8|0|0	6|7|2|3	18	4.5	0	0.53	0.89
FlagBirA-PPP1R35_AAA_FIP	NP_002446.2	MTX1	8|6|0|0|2|0|9|13|0|4|7|11	6|5|3|3	17	4.25	0	0.35	0.92
FlagBirA-PPP1R35_AAA_FIP	NP_942131.1	ACACA	7|5|11|0|27|17|11|13|12|5|3|5	8|10|4|3	25	6.25	0	0.28	0.93
FlagBirA-PPP1R35_AAA_FIP	NP_001248763.1	TBRG4	5|4|0|0|0|0|8|8|3|3|0|0	5|6|2|0	13	3.25	0	0.41	0.89
FlagBirA-PPP1R35_AAA_FIP	NP_001252541.1	CNOT1	22|24|5|8|6|4|42|46|37|36|27|28	27|28|5|5	65	16.25	0	0.37	0.94
FlagBirA-PPP1R35_AAA_FIP	NP_001254485.1	PDCD6	13|14|4|0|0|0|23|22|15|14|10|9	14|23|7|11	55	13.75	0	0.61	0.92
FlagBirA-PPP1R35_AAA_FIP	NP_056130.2	LARP1	0|0|8|8|3|3|0|0|0|0|0|0	7|6|0|0	13	3.25	0	0.41	0.89
FlagBirA-PPP1R35_AAA_FIP	NP_060225.4	NSUN2	55|51|55|58|67|56|63|47|68|67|32|36	101|119|91|74	385	96.25	0	1.43	0.93
FlagBirA-PPP1R35_AAA_FIP	NP_954664.1	BRE	8|0|0|0|0|0|10|13|6|7|0|0	7|12|3|3	25	6.25	0	0.54	0.9
FlagBirA-PPP1R35_AAA_FIP	NP_115958.2	GLYR1	0|0|2|0|0|0|0|2|3|2|0|0	4|7|5|4	20	5	0.04	2	0.66
FlagBirA-PPP1R35_AAA_FIP	NP_001986.2	ACSL1	4|7|2|0|0|2|13|13|5|5|6|4	5|4|2|0	11	2.75	0	0.21	0.94
FlagBirA-PPP1R35_AAA_FIP	XP_003960669.1	LOC101060521	0|0|0|0|0|0|0|0|0|0|0|0	8|5|0|0	13	3.25	0.5	32.5	0.2
FlagBirA-PPP1R35_AAA_FIP	NP_001177649.1	IKBKB	0|2|0|0|0|0|3|3|0|2|4|6	7|5|5|4	21	5.25	0	1.05	0.82
FlagBirA-PPP1R35_AAA_FIP	NP_005086.2	ZMYM4	0|0|0|0|0|0|0|0|0|0|0|0	10|10|11|11	42	10.5	1	105	0
FlagBirA-PPP1R35_AAA_FIP	NP_001654.1	ARF6	6|5|0|0|0|0|5|11|7|8|2|6	14|5|3|5	27	6.75	0	0.71	0.87
FlagBirA-PPP1R35_AAA_FIP	NP_001734.1	CALM2	7|8|13|11|9|11|15|15|13|15|0|3	21|17|9|7	54	13.5	0	0.9	0.9
FlagBirA-PPP1R35_AAA_FIP	NP_001753.1	CCT6A	172|186|131|141|128|135|161|161|148|130|113|111	158|131|144|155	588	147	0	0.82	0.94
FlagBirA-PPP1R35_AAA_FIP	NP_003900.1	CPNE3	20|21|9|12|10|9|18|20|24|16|14|21	17|19|11|12	59	14.75	0	0.66	0.93
FlagBirA-PPP1R35_AAA_FIP	NP_003463.1	DEK	10|7|2|0|0|0|8|6|10|7|5|11	12|19|12|11	54	13.5	0	1.29	0.85
FlagBirA-PPP1R35_AAA_FIP	NP_001393.1	EEF1A1	136|146|73|55|66|69|129|116|101|112|172|154	121|105|176|180	582	145.5	0	0.89	0.94
FlagBirA-PPP1R35_AAA_FIP	NP_001407.1	EIF4A1	145|144|120|115|128|132|103|113|97|107|116|116	80|65|135|124	404	101	0	0.7	0.94
FlagBirA-PPP1R35_AAA_FIP	NP_001419.1	ENO1	726|764|47|38|57|47|457|458|269|273|643|742	289|264|585|589	1727	431.75	0	0.57	0.94
FlagBirA-PPP1R35_AAA_FIP	NP_001966.1	ENO2	29|29|0|0|0|0|36|33|8|9|6|10	17|10|9|8	44	11	0	0.32	0.94
FlagBirA-PPP1R35_AAA_FIP	NP_001186318.1	EPB41L2	11|17|0|0|0|0|26|27|30|37|13|13	29|29|9|15	82	20.5	0	0.61	0.93
FlagBirA-PPP1R35_AAA_FIP	NP_001512.1	GTF3C2	0|0|0|0|0|0|0|0|0|0|0|0	10|9|17|12	48	12	1	120	0
FlagBirA-PPP1R35_AAA_FIP	NP_000405.1	HSD17B4	18|16|0|0|0|0|15|17|23|25|23|28	19|21|23|19	82	20.5	0	0.77	0.93
FlagBirA-PPP1R35_AAA_FIP	NP_000886.1	LTA4H	49|48|0|0|0|0|56|50|34|36|34|32	34|33|20|34	121	30.25	0	0.57	0.94
FlagBirA-PPP1R35_AAA_FIP	NP_002515.1	NRAS	4|3|0|0|0|0|5|6|6|8|7|0	7|10|6|3	26	6.5	0	0.87	0.86
FlagBirA-PPP1R35_AAA_FIP	NP_002544.1	ORC5	11|7|4|6|2|3|11|12|10|12|7|10	14|12|10|11	47	11.75	0	0.98	0.9
FlagBirA-PPP1R35_AAA_FIP	NP_002604.1	PDPK1	0|0|0|0|0|0|0|5|2|5|0|0	4|4|0|2	10	2.5	0	0.5	0.86
FlagBirA-PPP1R35_AAA_FIP	NP_000282.1	PGK1	256|261|5|5|3|3|251|226|145|133|266|291	130|136|153|131	550	137.5	0	0.49	0.94
FlagBirA-PPP1R35_AAA_FIP	NP_002697.1	PPM1B	24|25|79|69|183|68|12|18|22|24|21|31	21|29|26|28	104	26	0	0.2	0.94
FlagBirA-PPP1R35_AAA_FIP	NP_002700.1	PPP1CB	4|6|0|0|0|0|18|12|5|6|4|5	14|11|5|3	33	8.25	0	0.55	0.91
FlagBirA-PPP1R35_AAA_FIP	NP_001231903.1	PPP1CC	8|12|6|27|21|21|47|45|11|7|11|13	10|9|11|6	36	9	0	0.2	0.94
FlagBirA-PPP1R35_AAA_FIP	NP_001124163.1	PPP3CA	3|3|0|0|0|0|2|6|4|5|5|8	4|5|0|3	12	3	0	0.43	0.89
FlagBirA-PPP1R35_AAA_FIP	NP_002699.1	PPP1CA	5|2|0|0|0|0|0|0|5|5|0|0	5|4|6|5	20	5	0	1	0.83
FlagBirA-PPP1R35_AAA_FIP	NP_066955.1	PPP3CB	0|0|0|0|0|0|0|0|0|0|3|0	2|0|0|0	2	0.5	0	0.33	0.73
FlagBirA-PPP1R35_AAA_FIP	NP_000937.1	PRIM1	9|7|0|2|0|0|12|13|6|10|4|8	4|9|2|3	18	4.5	0	0.36	0.91
FlagBirA-PPP1R35_AAA_FIP	NP_002728.1	PRKCA	3|0|4|5|3|2|5|0|0|0|0|0	9|14|3|2	28	7	0.06	1.4	0.63
FlagBirA-PPP1R35_AAA_FIP	NP_002756.1	PRPS2	8|7|12|10|16|15|8|7|6|8|23|7	5|7|0|0	12	3	0	0.15	0.94
FlagBirA-PPP1R35_AAA_FIP	NP_002755.1	PRPS1	7|9|14|10|9|11|6|5|4|5|0|6	5|5|24|20	54	13.5	0	1.08	0.85
FlagBirA-PPP1R35_AAA_FIP	NP_001230871.1	PRPSAP2	32|29|7|10|8|9|30|26|19|22|25|24	21|25|13|10	69	17.25	0	0.56	0.93
FlagBirA-PPP1R35_AAA_FIP	NP_002794.1	PSMC2	63|54|60|57|47|49|42|41|42|43|43|49	48|38|55|58	199	49.75	0	0.81	0.94
FlagBirA-PPP1R35_AAA_FIP	NP_002807.1	PSMD12	24|29|29|27|20|27|23|25|24|26|15|22	25|23|19|13	80	20	0	0.69	0.93
FlagBirA-PPP1R35_AAA_FIP	NP_002849.1	ABCD3	0|0|3|0|0|0|0|0|17|15|0|0	7|7|2|6	22	5.5	0	0.34	0.93
FlagBirA-PPP1R35_AAA_FIP	NP_001185648.1	RBBP7	0|5|9|5|6|8|7|11|5|5|8|9	8|5|4|4	21	5.25	0	0.53	0.9
FlagBirA-PPP1R35_AAA_FIP	NP_005601.1	RBBP4	2|6|11|7|8|7|4|5|5|6|8|8	6|8|5|6	25	6.25	0	0.66	0.9
FlagBirA-PPP1R35_AAA_FIP	NP_002906.1	RFC3	4|0|0|0|3|0|9|9|9|6|6|5	4|7|4|3	18	4.5	0	0.5	0.9
FlagBirA-PPP1R35_AAA_FIP	NP_002936.1	RPA1	32|40|11|12|5|6|44|53|60|56|42|39	46|47|30|37	160	40	0	0.69	0.94
FlagBirA-PPP1R35_AAA_FIP	NP_000970.1	RPL18	9|6|21|22|18|19|8|6|11|9|4|3	11|12|16|9	48	12	0	0.56	0.93
FlagBirA-PPP1R35_AAA_FIP	NP_001139699.1	RPS20	11|11|9|9|12|12|12|10|9|7|17|18	7|8|13|15	43	10.75	0	0.61	0.92
FlagBirA-PPP1R35_AAA_FIP	NP_000997.1	RPS3A	21|24|34|37|29|36|20|16|20|19|13|11	33|23|32|40	128	32	0	0.88	0.93
FlagBirA-PPP1R35_AAA_FIP	NP_000998.1	RPS4X	32|35|53|60|65|64|28|29|31|32|33|32	48|41|53|48	190	47.5	0	0.74	0.94
FlagBirA-PPP1R35_AAA_FIP	NP_003127.1	SRP54	18|16|9|11|0|0|19|25|20|19|16|13	18|27|22|25	92	23	0	1.02	0.92
FlagBirA-PPP1R35_AAA_FIP	NP_003243.1	TIAL1	10|7|2|0|0|0|13|6|5|9|6|8	15|13|17|8	53	13.25	0	1.15	0.88
FlagBirA-PPP1R35_AAA_FIP	NP_003267.1	TMPO	49|60|14|12|13|8|51|57|26|42|25|31	32|43|54|42	171	42.75	0	0.73	0.94
FlagBirA-PPP1R35_AAA_FIP	NP_003391.1	XPO1	73|62|30|25|35|27|80|71|74|78|53|63	73|77|27|18	195	48.75	0	0.62	0.94
FlagBirA-PPP1R35_AAA_FIP	NP_002379.3	MCM3	59|78|70|66|63|69|61|68|71|56|44|48	79|65|70|73	287	71.75	0	0.96	0.94
FlagBirA-PPP1R35_AAA_FIP	NP_690867.3	KBTBD6	0|0|0|0|0|0|0|0|0|0|0|0	6|0|0|2	8	2	0.45	20	0.32
FlagBirA-PPP1R35_AAA_FIP	NP_000017.1	ADSL	47|47|5|7|6|0|48|50|37|32|42|46	36|42|25|29	132	33	0	0.67	0.94
FlagBirA-PPP1R35_AAA_FIP	NP_001317.1	CSTF3	4|3|0|0|0|0|6|6|0|0|3|5	5|5|0|0	10	2.5	0	0.42	0.87
FlagBirA-PPP1R35_AAA_FIP	NP_000242.1	MSH2	37|32|6|9|0|4|58|60|35|40|44|43	47|43|24|29	143	35.75	0	0.61	0.94
FlagBirA-PPP1R35_AAA_FIP	NP_000265.1	OAT	19|20|37|36|38|41|17|14|15|18|11|12	10|19|11|11	51	12.75	0	0.32	0.94
FlagBirA-PPP1R35_AAA_FIP	NP_000427.1	OXCT1	32|24|0|0|0|0|44|34|31|29|15|17	45|31|26|21	123	30.75	0	0.79	0.93
FlagBirA-PPP1R35_AAA_FIP	NP_942568.2	TBC1D9B	5|3|0|0|0|0|4|5|0|0|10|10	6|5|0|2	13	3.25	0	0.33	0.91
FlagBirA-PPP1R35_AAA_FIP	NP_002559.2	PABPC1	0|7|35|32|32|26|5|5|5|2|5|5	10|6|0|7	23	5.75	0	0.17	0.94
FlagBirA-PPP1R35_AAA_FIP	NP_001129125.1	PABPC4	0|0|23|24|22|13|0|0|0|3|0|0	8|4|8|0	20	5	0	0.21	0.93
FlagBirA-PPP1R35_AAA_FIP	NP_996895.1	AP3M1	3|6|0|0|0|0|8|12|8|15|5|5	9|6|7|5	27	6.75	0	0.5	0.92
FlagBirA-PPP1R35_AAA_FIP	NP_997176.1	MBNL1	0|0|0|0|0|0|0|0|0|0|0|0	7|4|2|4	17	4.25	0.94	42.5	0.01
FlagBirA-PPP1R35_AAA_FIP	NP_003128.3	SRPK1	18|21|27|24|27|22|24|14|3|8|0|11	20|8|14|13	55	13.75	0	0.51	0.93
FlagBirA-PPP1R35_AAA_FIP	NP_004291.1	ACP1	9|8|15|16|10|11|7|7|10|11|7|8	11|16|18|16	61	15.25	0	0.98	0.91
FlagBirA-PPP1R35_AAA_FIP	NP_004037.1	ATP5A1	58|43|108|104|139|136|58|53|71|55|56|61	49|61|61|65	236	59	0	0.43	0.94
FlagBirA-PPP1R35_AAA_FIP	NP_001782.1	CDC42	19|16|0|0|0|0|29|31|25|33|13|13	17|17|0|0	34	8.5	0	0.27	0.93
FlagBirA-PPP1R35_AAA_FIP	NP_004850.1	CLTC	365|340|304|309|306|277|295|290|295|291|242|259	299|271|317|295	1182	295.5	0	0.84	0.94
FlagBirA-PPP1R35_AAA_FIP	NP_009029.3	CLTCL1	41|53|51|0|0|0|42|45|45|52|39|45	53|0|53|0	106	26.5	0	0.5	0.94
FlagBirA-PPP1R35_AAA_FIP	NP_004102.1	FEN1	14|18|4|6|0|4|22|11|13|12|7|9	26|23|25|17	91	22.75	0	1.14	0.91
FlagBirA-PPP1R35_AAA_FIP	NP_004823.1	GSTO1	40|35|31|32|26|31|29|25|27|23|40|39	32|26|43|39	140	35	0	0.88	0.93
FlagBirA-PPP1R35_AAA_FIP	NP_004126.1	IDH3G	10|12|0|0|0|0|12|9|2|6|8|8	13|11|10|5	39	9.75	0	0.81	0.9
FlagBirA-PPP1R35_AAA_FIP	NP_004512.1	KIF5B	56|56|80|86|78|79|59|40|42|74|19|25	61|49|57|61	228	57	0	0.69	0.94
FlagBirA-PPP1R35_AAA_FIP	NP_004513.1	KIF5C	0|0|2|2|0|0|0|2|2|0|0|0	2|21|0|0	23	5.75	0.25	2.88	0.42
FlagBirA-PPP1R35_AAA_FIP	NP_004777.1	TXNL1	4|5|0|0|0|0|7|9|11|9|10|15	6|6|11|3	26	6.5	0	0.5	0.91
FlagBirA-PPP1R35_AAA_FIP	NP_001673.2	ATP2B1	4|0|6|10|0|2|0|0|13|17|0|0	11|17|4|3	35	8.75	0	0.58	0.91
FlagBirA-PPP1R35_AAA_FIP	NP_004926.1	CDK5	6|7|3|4|0|0|13|9|6|10|4|6	9|11|12|7	39	9.75	0	0.85	0.9
FlagBirA-PPP1R35_AAA_FIP	NP_001252.1	CDK9	4|0|2|0|0|0|5|3|3|5|4|4	7|7|5|4	23	5.75	0	1.15	0.81
FlagBirA-PPP1R35_AAA_FIP	NP_001777.1	CDK1	14|11|8|8|8|3|6|9|11|13|6|5	10|9|15|13	47	11.75	0	0.87	0.91
FlagBirA-PPP1R35_AAA_FIP	NP_938033.1	SRC	0|0|0|0|0|0|8|5|5|6|0|0	9|11|0|0	20	5	0	0.71	0.84
FlagBirA-PPP1R35_AAA_FIP	NP_005142.1	USP14	32|29|18|19|10|15|53|49|49|39|29|34	34|32|17|21	104	26	0	0.51	0.94
FlagBirA-PPP1R35_AAA_FIP	NP_005311.1	HIST1H1D	0|0|0|0|0|0|0|0|14|15|0|0	21|15|0|0	36	9	0	0.62	0.9
FlagBirA-PPP1R35_AAA_FIP	NP_005491.1	SAE1	51|64|22|21|19|21|51|65|37|44|67|65	40|37|35|24	136	34	0	0.52	0.94
FlagBirA-PPP1R35_AAA_FIP	NP_005712.1	ACTR3	19|21|0|0|0|0|23|22|24|24|20|21	13|17|15|14	59	14.75	0	0.61	0.93
FlagBirA-PPP1R35_AAA_FIP	NP_005709.1	ARPC4	0|0|0|0|0|0|6|0|0|8|0|0	6|0|4|3	13	3.25	0	0.46	0.88
[truncated: 9,319 more rows]
