# Supplementary material for: PPP1R35 is a novel centrosomal protein that regulates centriole length in concert with the microcephaly protein RTTN
Source: eLife journal article supplement (doi:10.7554/elife.37846), 2018-08-31
Supplement: supp [file elife-37846-supp-v1.zip › elife_poa_e37846_Supplementary_file_3.docx]

| **Target** | **Sense Strand Sequence (5’ to 3’)** | **siRNA ID** |
| --- | --- | --- |
| **Scrambled siRNA** | Sequence not available | 4390844 |
| **GAPDH** | Sequence not available | 4390850 |
| **PPP1R35, Exon** | CUGAGAAAGUCGUUCCAGAtt | s48124 |
| **PPP1R35, 3’ UTR** | GUAUUUUUGUGUUAAACUAtt | s195859 |
| **RTTN** | CCCGUGUCUUCACUUUGCAAUGGAA | RTTNHSS119506 |
