# Supplementary material for: PPP1R35 is a novel centrosomal protein that regulates centriole length in concert with the microcephaly protein RTTN
Source: eLife journal article supplement (doi:10.7554/elife.37846), 2018-08-31
Supplement: supp [file elife-37846-supp-v1.zip › elife_poa_e37846_Supplementary_file_4.xlsx]

## Sheet: Sheet1
Summary of Statisics
PPP1R35 is a Novel Centrosomal Protein that Regulates Centriole Length In Concert with the Microcephaly Protein RTTN
Andrew M. Sydor, Etienne Coyaud, Cristina Rovelli, Estelle Laurent, Helen Liu, Brian Raught, and Vito Mennella
Note: Unless otherwise noted, all statistics in this table were conducted using Barnard's Exact Test.
Figure 3c
Marker	Sample	Number of Analyzed Cells	p value (vs Scrambled siRNA)
CEP152	Scrambled siRNA	3348	N/A
	PPP1R35 Exon siRNA	2365	1.4e-126
	PPP1R35 3' UTR siRNA	2137	6.4e-131
	3' UTR + GFP-PPP1R35	1330	0.2
Figure 3e
Marker	Sample	Number of Analyzed Cells	p value (vs Scrambled siRNA)
SAS6	Scrambled siRNA	629	N/A
	PPP1R35 Exon siRNA	419	0.01
	PPP1R35 3' UTR siRNA	395	0.02
CETN1	Scrambled siRNA	2064	N/A
	PPP1R35 Exon siRNA	2043	2.4e-25
	PPP1R35 3' UTR siRNA	1872	9.1e-20
CEP135	Scrambled siRNA	945	N/A
	PPP1R35 Exon siRNA	1180	0.02
	PPP1R35 3' UTR siRNA	865	5.4e-06
CEP295	Scrambled siRNA	339	N/A
	PPP1R35 Exon siRNA	319	2.3e-09
	PPP1R35 3' UTR siRNA	340	2.5e-12
POC1B	Scrambled siRNA	462	N/A
	PPP1R35 Exon siRNA	514	2.6e-09
	PPP1R35 3' UTR siRNA	435	6e-13
CEP152	Scrambled siRNA	3348	N/A
	PPP1R35 Exon siRNA	2365	1.4e-126
	PPP1R35 3' UTR siRNA	2137	6.4e-131
Figure 4e
Marker	Sample	Number of Analyzed Cells	p value (vs Scrambled siRNA)
mCherry-RTTN	Scrambled siRNA	1436	N/A
	PPP1R35 Exon siRNA	1572	4.7e-09
	PPP1R35 3' UTR siRNA	1260	8.2e-20
Figure 4f
Marker	Sample	Number of Analyzed Cells	p value (vs Scrambled siRNA)
GFP-PPP1R35	Scrambled siRNA	522	N/A
	PPP1R35 Exon siRNA	405	2.1e-15
Figure 5c
Marker	Sample	Number of Analyzed Cells	p value (vs Scrambled siRNA)
CEP152	Scrambled siRNA	3348	N/A
	PPP1R35 3' UTR siRNA	2137	6.4e-131
	3' UTR + GFP-PPP1R35	1330	0.2
	3' UTR + S45D,S47D,S52D GFP-PPP1R35	530	0.2
	3' UTR + S45A GFP-PPP1R35	554	0.0036
	3' UTR + S47A GFP-PPP1R35	737	9.3e-05
Figure 5e
Marker	Sample	Number of Analyzed Cells	p value (vs Scrambled siRNA)
CEP152	Scrambled siRNA	3348	N/A
	PPP1R35 3' UTR siRNA	2137	6.4e-131
	3' UTR + GFP-PPP1R35	1330	0.2
	3' UTR + V79A, F81A GFP-PPP1R35	1061	0.00089
Figure 6b
siRNA Treatment/Construct	p-value (T-Test; vs Scrambled siRNA)
PPP1R35 Exon siRNA	0.001
PPP1R35 3' UTR siRNA	0.0003
GFP-PPP1R35 U2OS	0.37
Figure 6c
Marker	Sample	Number of Analyzed Cells	p value (vs Scrambled siRNA)
CP110	Scrambled siRNA	323	N/A
	PPP1R35 Exon siRNA	318	0.9
	PPP1R35 3' UTR siRNA	321	0.08
CPAP	Scrambled siRNA	1395	N/A
	PPP1R35 Exon siRNA	1152	1e-52
	PPP1R35 3' UTR siRNA	865	6.3e-65
SPICE	Scrambled siRNA	590	N/A
	PPP1R35 Exon siRNA	665	5.8e-21
	PPP1R35 3' UTR siRNA	538	3e-10
POC5	Scrambled siRNA	363	N/A
	PPP1R35 Exon siRNA	357	1.1e-06
	PPP1R35 3' UTR siRNA	281	4.8e-05
Figure 3- figure supplement 2
RT-qPCR Target	siRNA Treatment	p-value (T-Test; vs Scrambled siRNA)
c7orf47-1	PPP1R35 Exon siRNA	4.54886e-08
	PPP1R35 3' UTR siRNA	9.2221e-08
c7orf47-2	PPP1R35 Exon siRNA	1.49264e-09
	PPP1R35 3' UTR siRNA	1.24596e-12
Figure 3- figure supplement 5
Marker	Sample	Number of Analyzed Cells	p value (vs Scrambled siRNA)
Cdk5rap2	Scrambled siRNA	742	N/A
	PPP1R35 Exon siRNA	521	1.3e-10
	PPP1R35 3' UTR siRNA	521	1.8e-05
γ-tubulin	Scrambled siRNA	767	N/A
	PPP1R35 Exon siRNA	705	4.5e-17
	PPP1R35 3' UTR siRNA	581	3.6e-12
Figure 4- figure supplement 1
Marker	Sample	Number of Analyzed Cells	p value (vs Scrambled siRNA)
Centrin-1	Scrambled siRNA	523	N/A
	RTTN siRNA	469	0.8
Figure 6- figure supplement 12
Marker	Sample	Number of Analyzed Cells	p value (vs Scrambled siRNA)
Acetylated Tubulin	Scrambled siRNA	343	N/A
	PPP1R35 Exon siRNA	380	0.08
	PPP1R35 3' UTR siRNA	301	0.2
