# Supplementary figures and images for: PPP1R35 is a novel centrosomal protein that regulates centriole length in concert with the microcephaly protein RTTN
Source: eLife journal article supplement (doi:10.7554/elife.37846), 2018-08-31

**Anti-GFP**

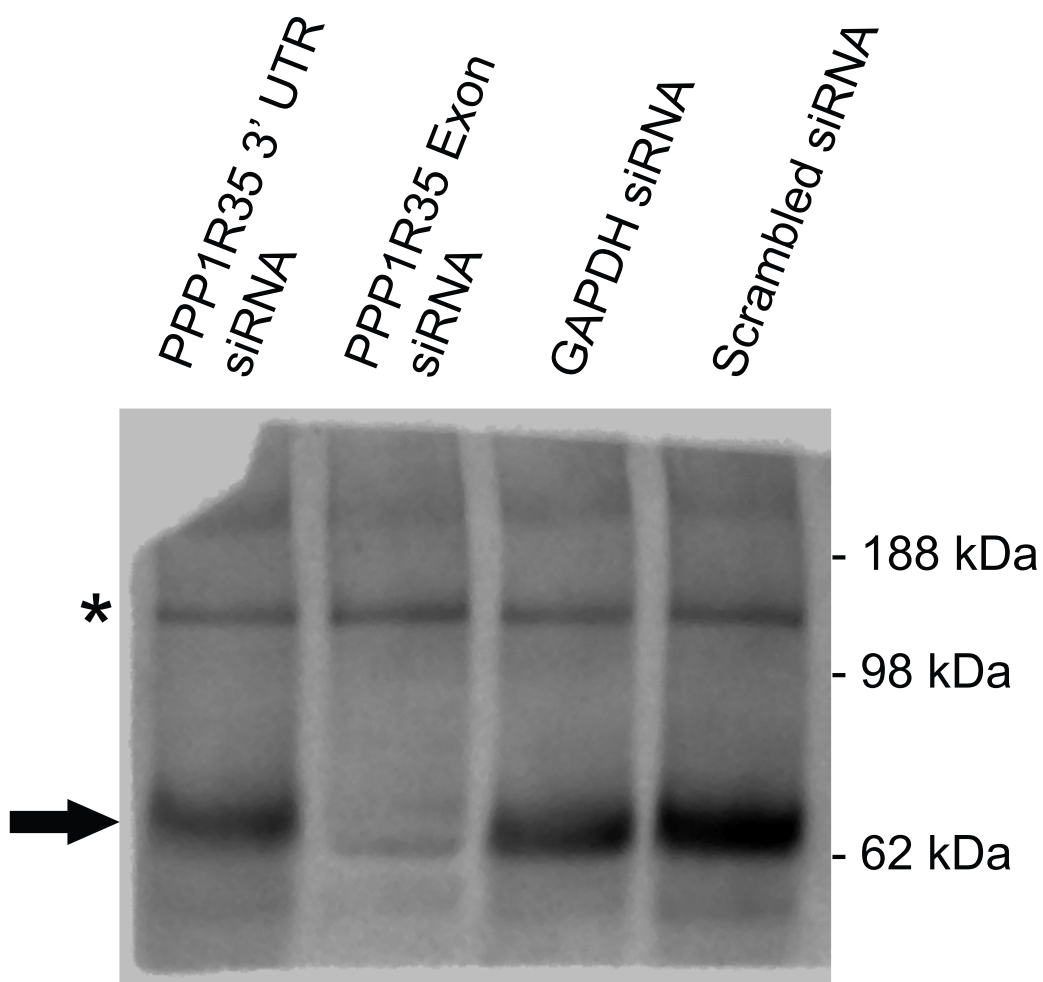

**Anti-GAPDH**

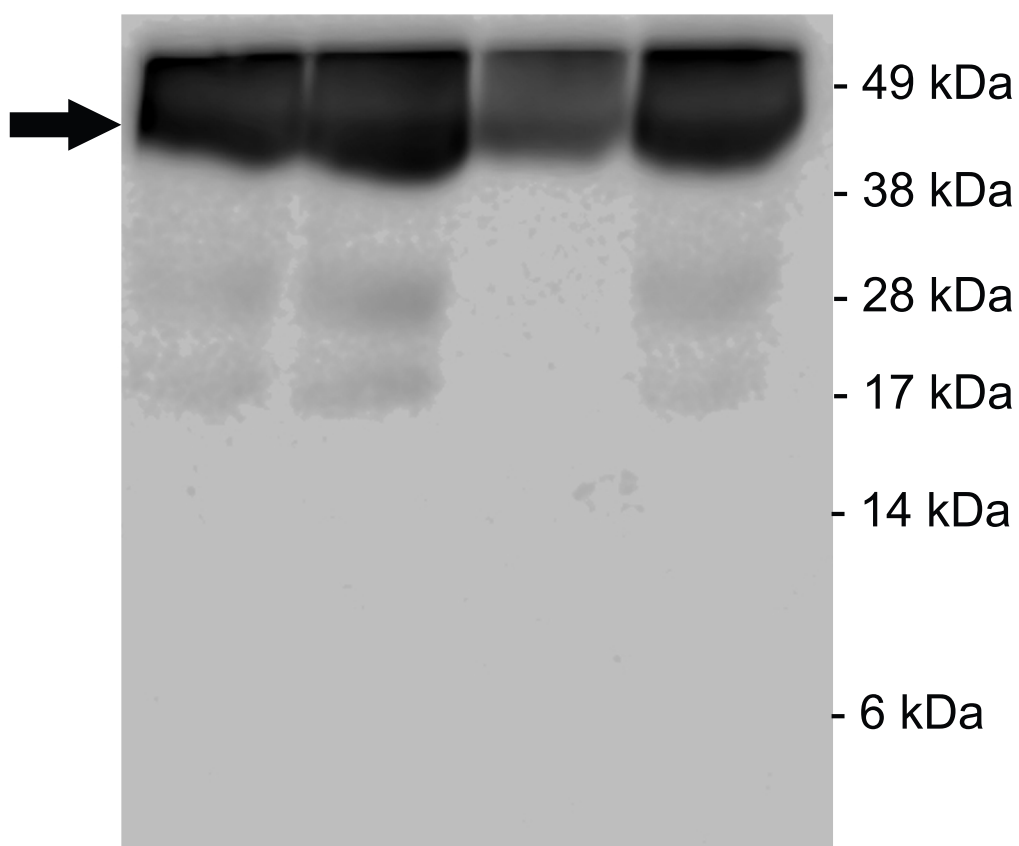

Supplement: supp [file elife-37846-supp-v1.zip › elife_poa_e37846_Figure_3_figure_supplement_1.pdf]

## Annotated PP1 Regulatory Domain

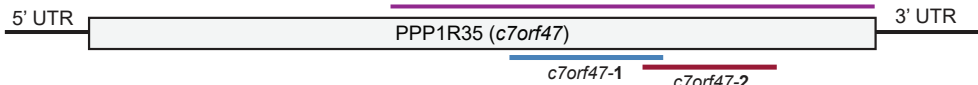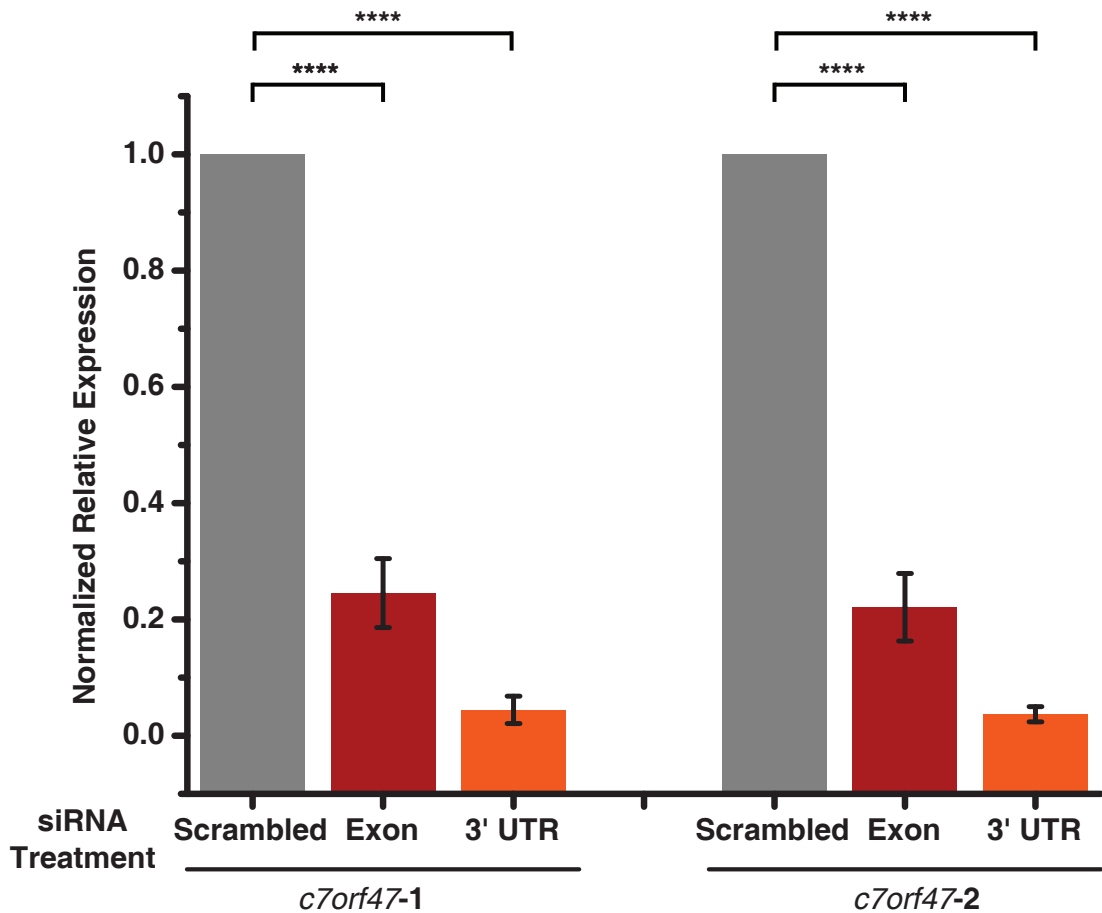

Supplement: supp [file elife-37846-supp-v1.zip › elife_poa_e37846_Figure_3_figure_supplement_2.pdf]

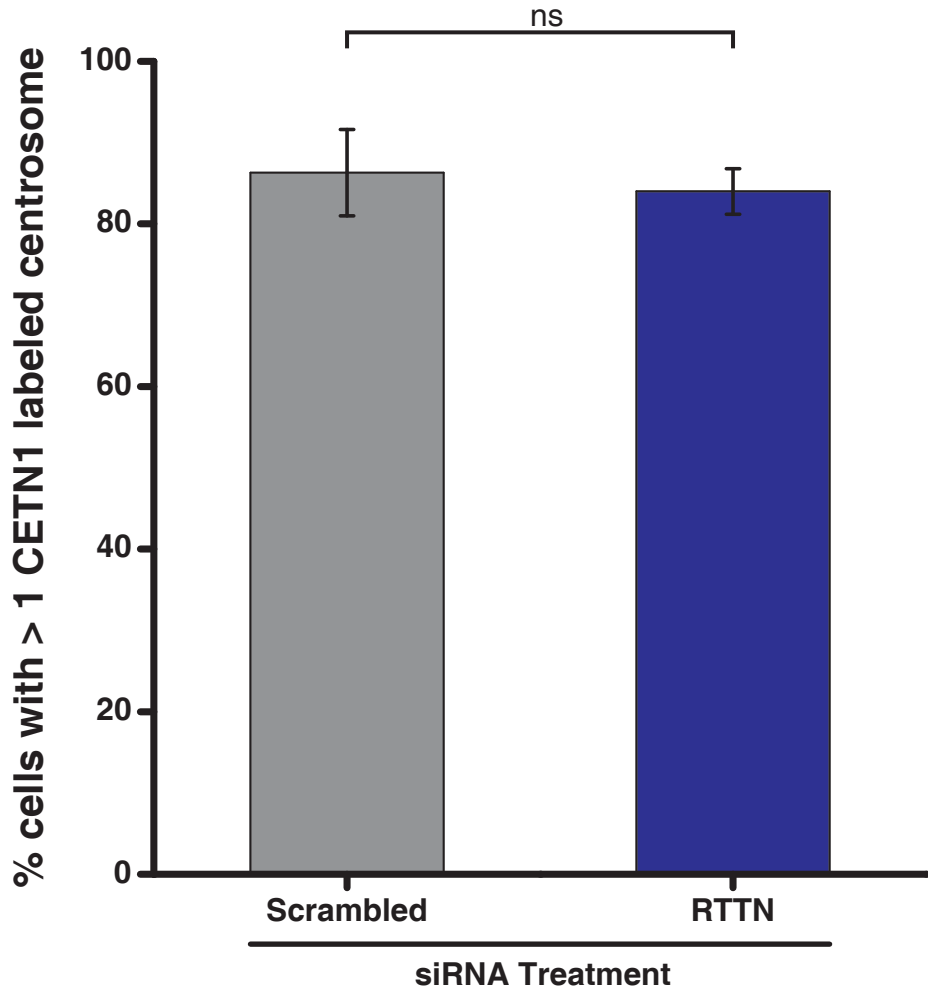

Supplement: supp [file elife-37846-supp-v1.zip › elife_poa_e37846_Figure_4_figure_supplement_1.pdf]

**% cells with > 1 centrosomal spot**

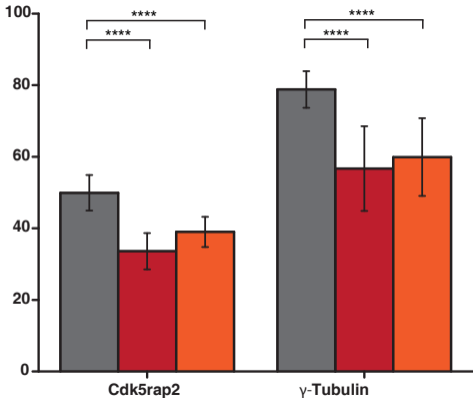

Supplement: supp [file elife-37846-supp-v1.zip › elife_poa_e37846_Figure_3_figure_supplement_5.pdf]

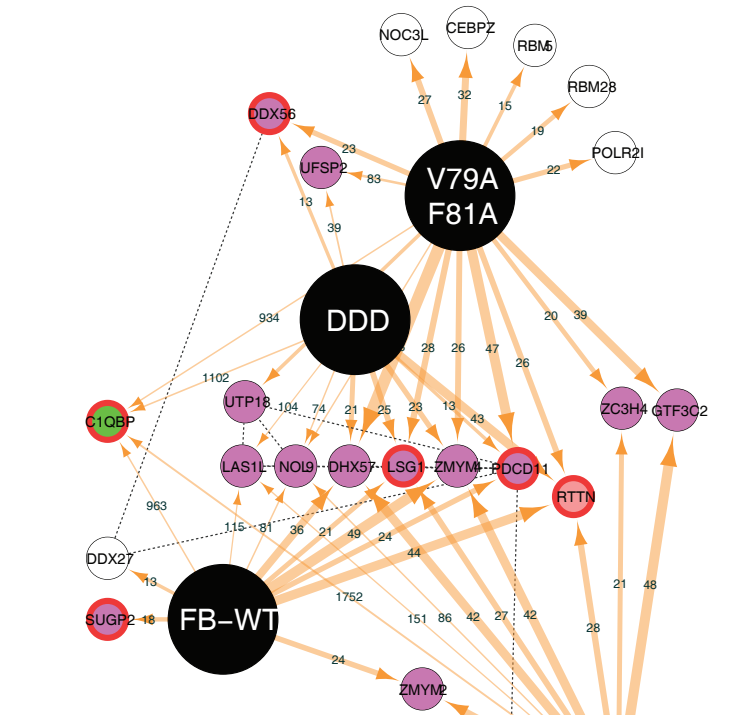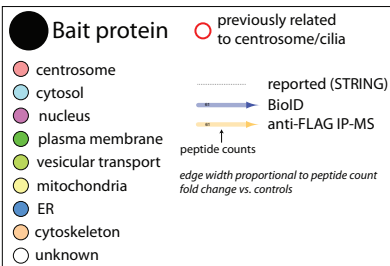

Supplement: supp [file elife-37846-supp-v1.zip › elife_poa_e37846_Figure_5_figure_supplement_3.pdf]

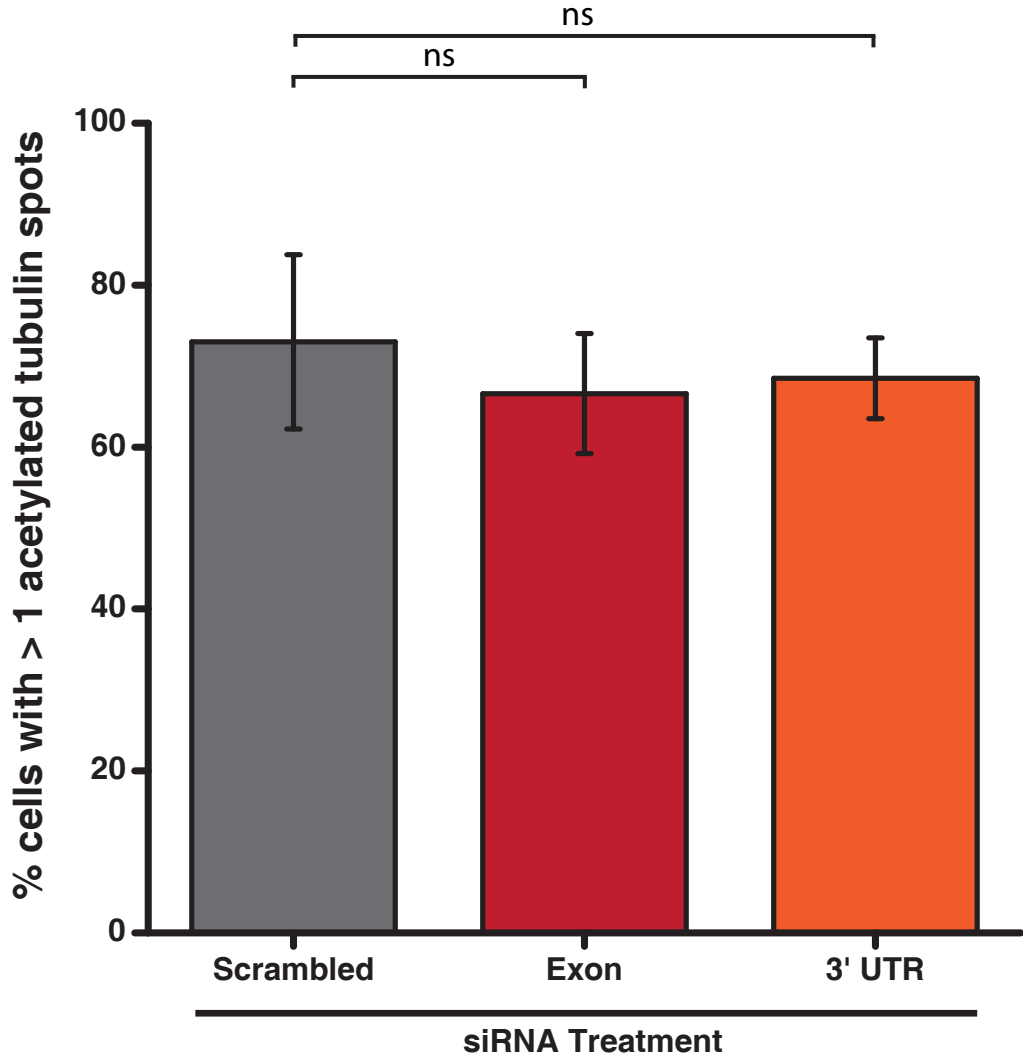

Supplement: supp [file elife-37846-supp-v1.zip › elife_poa_e37846_Figure_6_figure_supplement_1.pdf]

**a****WT U2-OS****GFP-PPP1R35 U2-OS**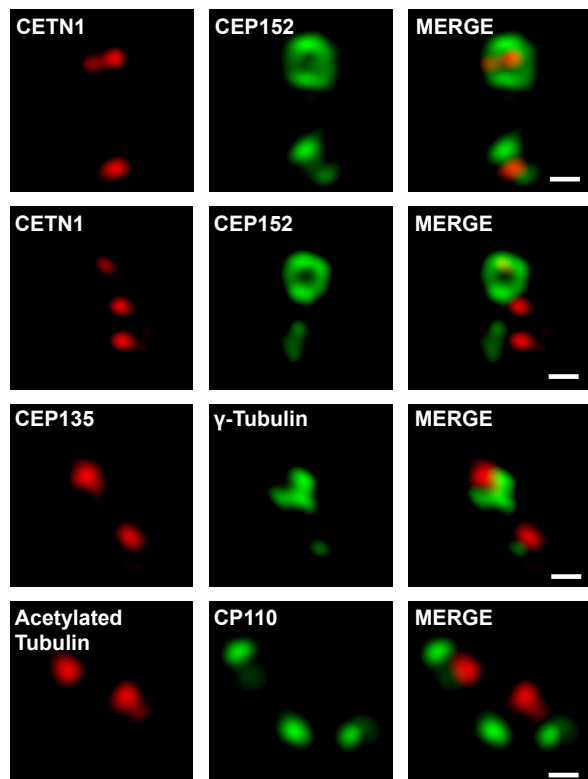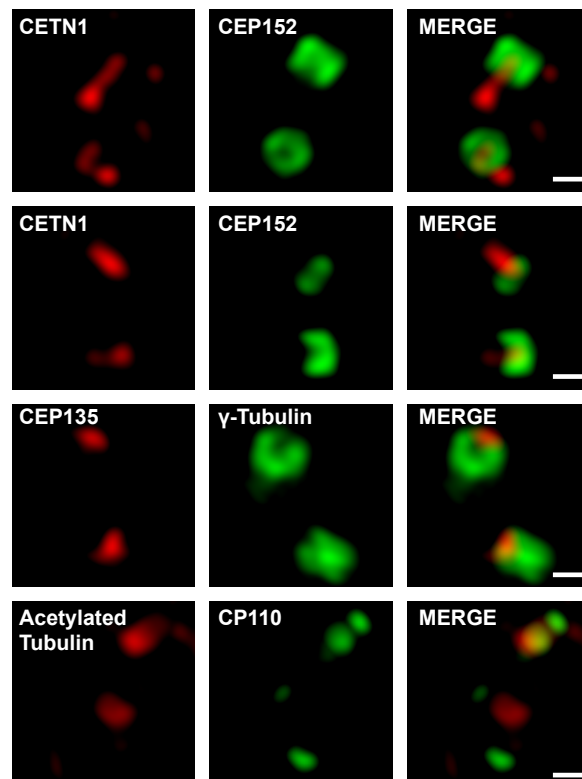**b**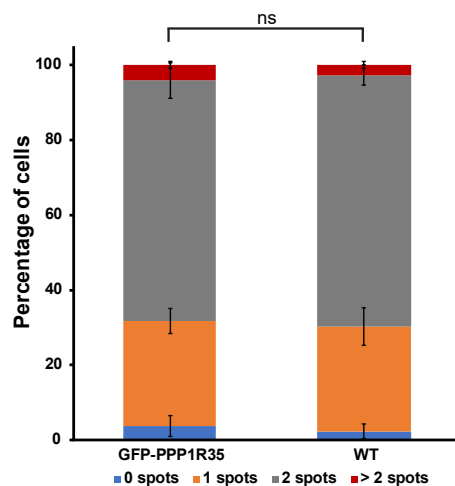

Supplement: supp [file elife-37846-supp-v1.zip › elife_poa_e37846_Figure_1_figure_supplement_1.pdf]

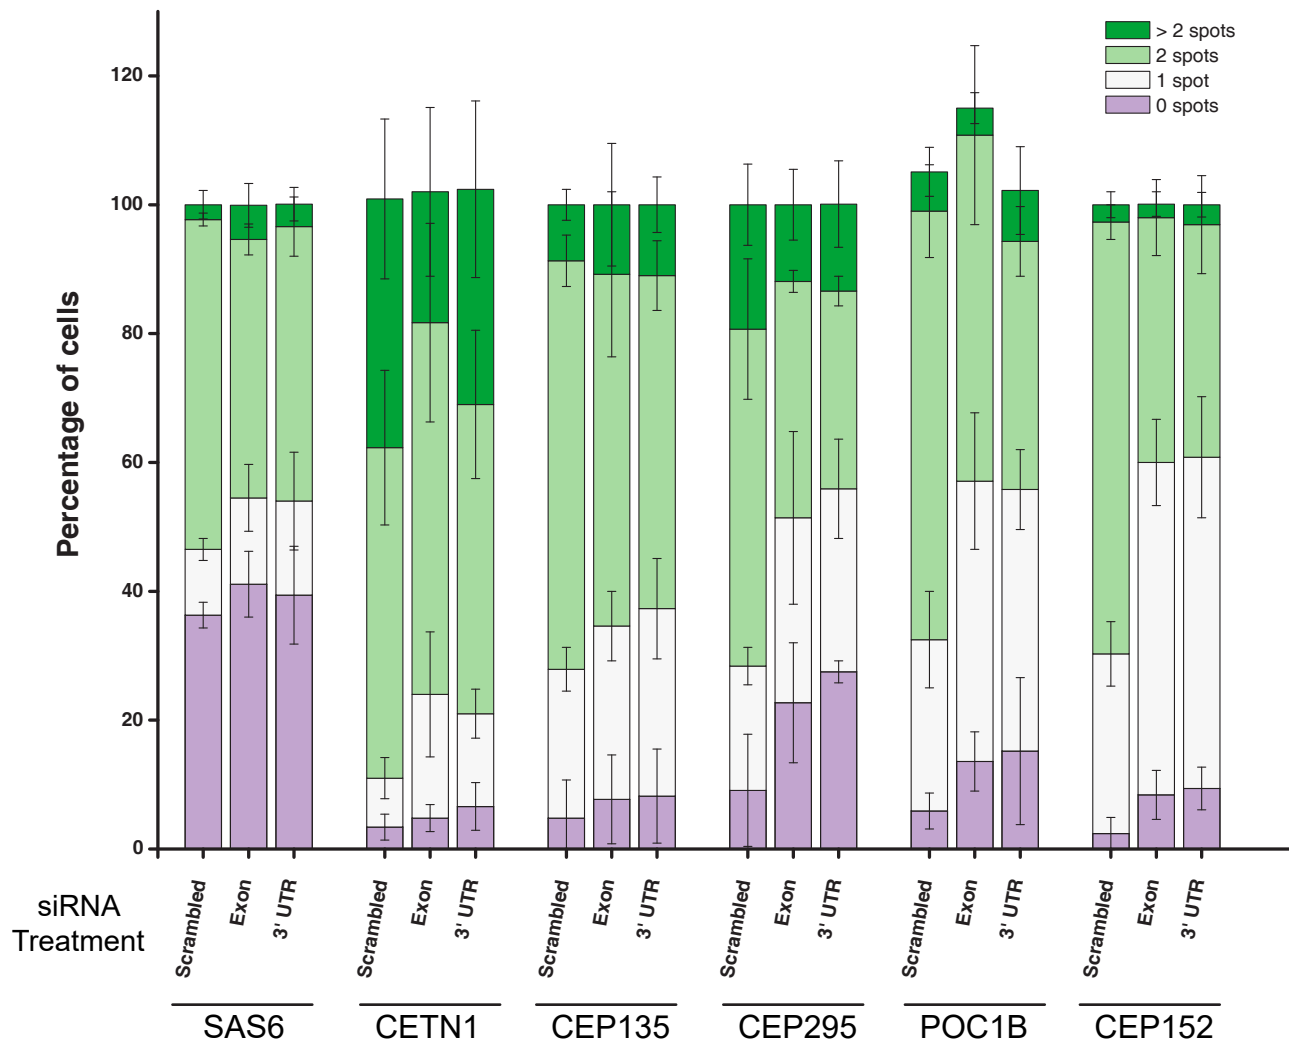

Supplement: supp [file elife-37846-supp-v1.zip › elife_poa_e37846_Figure_3_figure_supplement_4.pdf]

**a**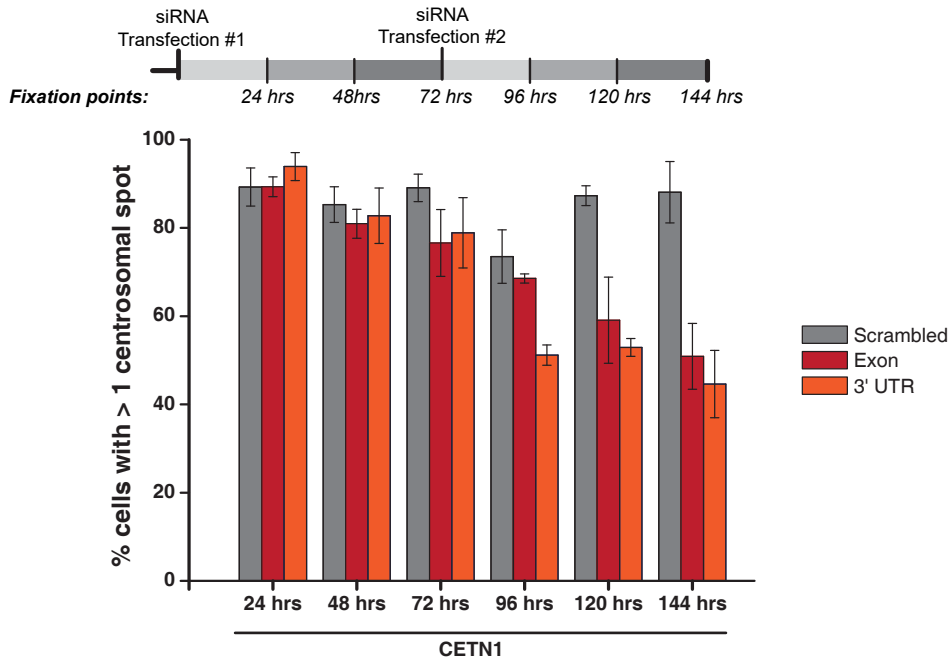**b**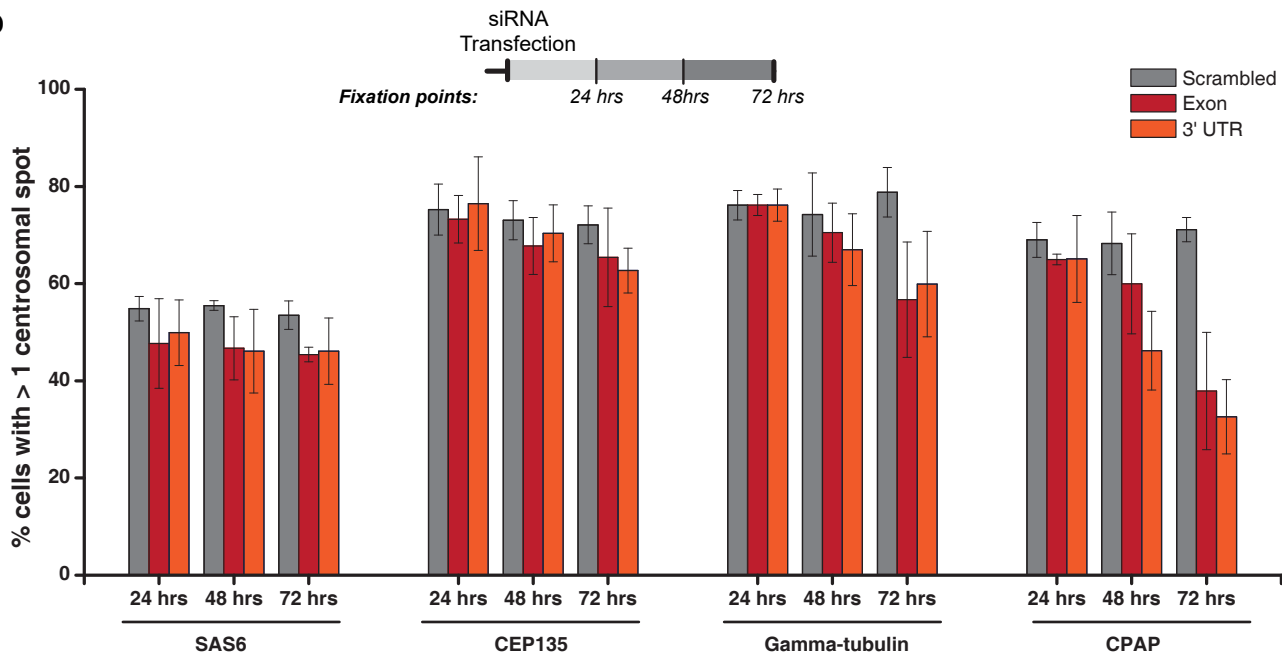

Supplement: supp [file elife-37846-supp-v1.zip › elife_poa_e37846_Figure_3_figure_supplement_3.pdf]

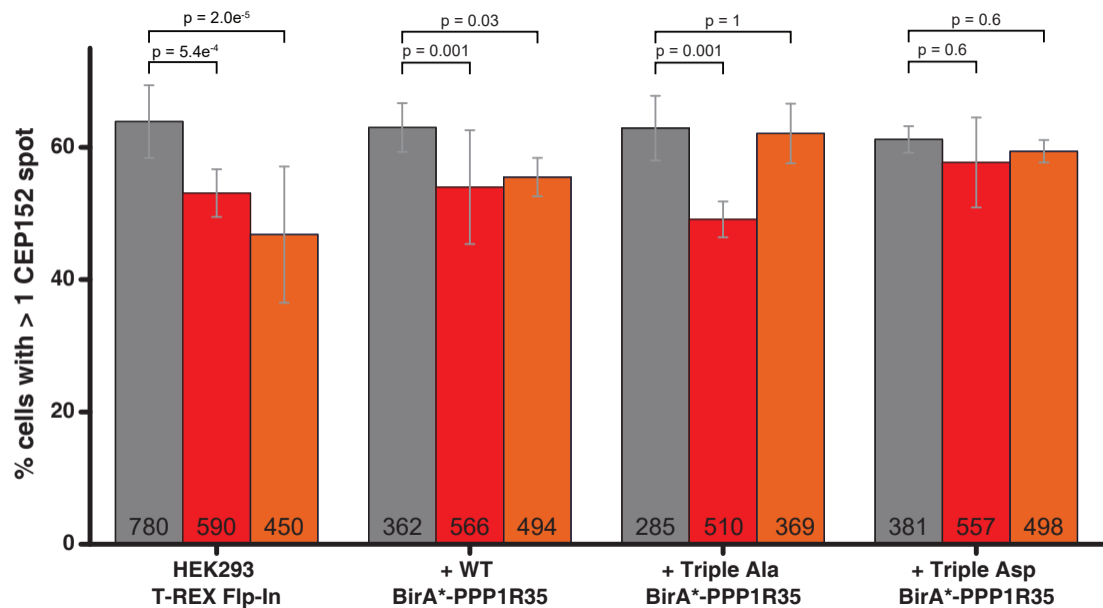

Supplement: supp [file elife-37846-supp-v1.zip › elife_poa_e37846_Figure_5_figure_supplement_4.pdf]
